# Supplementary material for: Towards automatic home-based sleep apnea estimation using deep learning
Source: NPJ Digit Med. 2024 Jun 1;7:144. doi: 10.1038/s41746-024-01139-z (PMC11144223; doi:10.1038/s41746-024-01139-z)
Supplement: Supplementary file 2 — Supplementary Table 4 [file 41746_2024_1139_MOESM2_ESM.xlsx]

## Sheet: RESULTS_VAL
								f1 multiclass - wieghted
WS	Fold	ID	ID	Name	Time	AUROC	AUPR	f1_T_0.1	f1_T_0.2	f1_T_0.3	f1_T_0.4	f1_T_0.5	f1_T_0.6	f1_T_0.7	f1_T_0.8	f1_T_0.9	Max f1
30	8	0	0	Models_3_2_3_4_5_6	6364.65	0.929719	0.755168	0.0536688	0.0536688	0.0568889	0.100026	0.108883	0.339436	0.535213	0.564767	0.140488	0.564767
30	8	1	1	Models_3_2_3_4_5	5760.73	0.929499	0.758992	0.0536688	0.0547009	0.0568889	0.0618357	0.110617	0.28976	0.553242	0.594116	0.457188	0.594116
30	8	2	2	Models_3_2_3_4_6	2939.66	0.894732	0.676175	0.0536688	0.0536688	0.0536688	0.0568889	0.0632099	0.258466	0.443675	0.51439	0.236379	0.51439
30	8	3	3	Models_3_2_3_5_6	5619.03	0.926375	0.749755	0.0536688	0.0547009	0.0568889	0.0592593	0.142222	0.268736	0.506628	0.596268	0.525397	0.596268
30	8	4	4	Models_3_2_4_5_6	5555.4	0.92495	0.761042	0.0536688	0.0547009	0.0568889	0.0632099	0.179601	0.339436	0.568254	0.510404	0.499035	0.568254
30	8	5	5	Models_3_3_4_5_6	5543.81	0.92724	0.749127	0.0536688	0.0536688	0.0557734	0.0618357	0.206869	0.339436	0.611113	0.48254	0.100026	0.611113
30	8	6	6	Models_3_2_3_4	2199.53	0.892554	0.671634	0.0536688	0.0536688	0.0536688	0.0568889	0.0632099	0.25947	0.396248	0.448849	0.353086	0.448849
30	8	7	7	Models_3_2_3_5	4868.32	0.925977	0.74444	0.0536688	0.0547009	0.0568889	0.101342	0.168081	0.28976	0.54005	0.617228	0.460568	0.617228
30	8	8	8	Models_3_2_3_6	2302.33	0.878185	0.632532	0.0536688	0.0536688	0.0536688	0.0568889	0.0592593	0.14631	0.331259	0.528178	0.237689	0.528178
30	8	9	9	Models_3_2_4_5	5231.45	0.926826	0.762436	0.0536688	0.0547009	0.0568889	0.0632099	0.171823	0.339436	0.590446	0.539341	0.443869	0.590446
30	8	10	10	Models_3_2_4_6	2309.32	0.871511	0.652271	0.0536688	0.0536688	0.0536688	0.0568889	0.13325	0.31156	0.443021	0.469392	0.199534	0.469392
30	8	11	11	Models_3_2_5_6	5051.82	0.919855	0.741366	0.0536688	0.0547009	0.0557734	0.0605201	0.142222	0.316049	0.544012	0.513318	0.370437	0.544012
30	8	12	12	Models_3_3_4_5	4999.99	0.928227	0.754746	0.0536688	0.0536688	0.0580499	0.0632099	0.206869	0.339436	0.511156	0.511785	0.469394	0.511785
30	8	13	13	Models_3_3_4_6	2285.81	0.885717	0.650434	0.0536688	0.0536688	0.0536688	0.0547009	0.0618357	0.293333	0.364897	0.436653	0.324392	0.436653
30	8	14	14	Models_3_3_5_6	4970.74	0.921934	0.729222	0.0536688	0.0536688	0.0568889	0.0605201	0.208213	0.292542	0.492593	0.538495	0.458491	0.538495
30	8	15	15	Models_3_4_5_6	5007.11	0.917348	0.739359	0.0536688	0.0536688	0.0580499	0.102716	0.262564	0.356359	0.534179	0.502011	0.135758	0.534179
30	8	16	16	Models_3_2_3	1551.83	0.877062	0.642757	0.0536688	0.0536688	0.0536688	0.0568889	0.0592593	0.14631	0.417239	0.569203	0.19771	0.569203
30	8	17	17	Models_3_2_4	1553.92	0.866506	0.644374	0.0536688	0.0536688	0.0536688	0.0909295	0.131997	0.261276	0.431545	0.483566	0.289893	0.483566
30	8	18	18	Models_3_2_5	4365.5	0.917809	0.734525	0.0536688	0.0547009	0.0568889	0.0605201	0.144046	0.363913	0.582918	0.598222	0.142222	0.598222
30	8	19	19	Models_3_2_6	1533.27	0.834347	0.565941	0.0536688	0.0536688	0.0536688	0.0920368	0.13325	0.101116	0.426214	0.606061	0.0954768	0.606061
30	8	20	20	Models_3_3_4	1544	0.884193	0.658825	0.0536688	0.0536688	0.0536688	0.0547009	0.0618357	0.234349	0.502129	0.453105	0.295947	0.502129
30	8	21	21	Models_3_3_5	4324.87	0.921512	0.730463	0.0536688	0.0536688	0.0568889	0.0605201	0.177778	0.292542	0.491735	0.563776	0.534674	0.563776
30	8	22	22	Models_3_3_6	1544.7	0.853772	0.566547	0.0536688	0.0536688	0.0536688	0.0536688	0.0568889	0.134483	0.471732	0.2897	0.0536688	0.471732
30	8	23	23	Models_3_4_5	4256.52	0.919791	0.749837	0.0536688	0.0536688	0.0592593	0.134321	0.264483	0.364127	0.53855	0.50153	0.45413	0.53855
30	8	24	24	Models_3_4_6	1604.3	0.826226	0.589695	0.0536688	0.0536688	0.0536688	0.0536688	0.161329	0.302667	0.377291	0.506141	0.170719	0.506141
30	8	25	25	Models_3_5_6	4351.19	0.900472	0.691124	0.0536688	0.0536688	0.0568889	0.0632099	0.225322	0.279365	0.545777	0.595822	0.29202	0.595822
30	8	26	26	Models_3_2	846.714	0.828863	0.574984	0.0536688	0.0536688	0.0536688	0.0920368	0.132736	0.137598	0.479812	0.460647	0.168081	0.479812
30	8	27	27	Models_3_3	867.194	0.851468	0.572559	0.0536688	0.0536688	0.0536688	0.0536688	0.0568889	0.0677249	0.390399	0.418868	0.195581	0.418868
30	8	28	28	Models_3_4	912.231	0.81412	0.555255	0.0536688	0.0536688	0.0536688	0.0536688	0.225377	0.361431	0.0536688	0.0536688	0.0536688	0.361431
30	8	29	29	Models_3_5	3697.99	0.899313	0.692282	0.0536688	0.0536688	0.0580499	0.0632099	0.203636	0.35224	0.509675	0.625409	0.336334	0.625409
30	8	30	30	Models_3_6	838.871	0.56608	0.205232	0.0536688	0.0536688	0.0536688	0.0536688	0.145072	0.175913	0.0536688	0.0536688	0.0536688	0.175913
30	8	42	42	Models_2_2_3_4_5_6	7218	0.939216	0.787	0.0536688	0.0547009	0.0557734	0.0580499	0.138769	0.234844	0.400491	0.627868	0.29239	0.627868
30	8	43	43	Models_2_2_3_4_5	7032.92	0.934763	0.776621	0.0536688	0.0557734	0.0568889	0.0943158	0.137453	0.209911	0.371122	0.664048	0.617965	0.664048
30	8	44	44	Models_2_2_3_4_6	3596.51	0.902565	0.687026	0.0536688	0.0536688	0.0536688	0.0568889	0.0568889	0.132466	0.283531	0.556918	0.200184	0.556918
30	8	45	45	Models_2_2_3_5_6	6941.44	0.928828	0.753966	0.0536688	0.0547009	0.0557734	0.0963951	0.137453	0.178342	0.315626	0.661441	0.448293	0.661441
30	8	46	46	Models_2_2_4_5_6	6875.66	0.930452	0.769896	0.0536688	0.0547009	0.0568889	0.0975561	0.140143	0.236394	0.427856	0.727485	0.42653	0.727485
30	8	47	47	Models_2_3_4_5_6	6848.64	0.93323	0.766917	0.0536688	0.0547009	0.0557734	0.0580499	0.140143	0.207379	0.448579	0.551169	0.530021	0.551169
30	8	48	48	Models_2_2_3_4	2689.63	0.900644	0.682676	0.0536688	0.0536688	0.0536688	0.0568889	0.0568889	0.1644	0.304386	0.475341	0.202291	0.475341
30	8	49	49	Models_2_2_3_5	5959.62	0.9287	0.74499	0.0536688	0.0536688	0.0557734	0.0557734	0.137453	0.247093	0.563983	0.341093	0.0536688	0.563983
30	8	50	50	Models_2_2_3_6	2698.19	0.879169	0.629648	0.0536688	0.0536688	0.0536688	0.0557734	0.0568889	0.133125	0.267875	0.475926	0.226524	0.475926
30	8	51	51	Models_2_2_4_5	5969.36	0.932446	0.778849	0.0536688	0.0547009	0.0568889	0.0963951	0.140143	0.241015	0.371122	0.656898	0.551527	0.656898
30	8	52	52	Models_2_2_4_6	2684.34	0.887569	0.660286	0.0536688	0.0536688	0.0547009	0.0557734	0.094161	0.0968899	0.38119	0.589571	0.29239	0.589571
30	8	53	53	Models_2_2_5_6	5880.43	0.921573	0.740114	0.0536688	0.0547009	0.0547009	0.0580499	0.14158	0.241571	0.521646	0.677658	0.0536688	0.677658
30	8	54	54	Models_2_3_4_5	5867.34	0.933881	0.77152	0.0536688	0.0547009	0.0568889	0.0954768	0.14158	0.203636	0.423314	0.608017	0.538759	0.608017
30	8	55	55	Models_2_3_4_6	2209.44	0.895858	0.670755	0.0536688	0.0536688	0.0536688	0.0547009	0.0592593	0.159756	0.290082	0.46467	0.163234	0.46467
30	8	56	56	Models_2_3_5_6	4775.08	0.926194	0.743174	0.0536688	0.0547009	0.0557734	0.0975561	0.0948148	0.21133	0.374444	0.583709	0.531248	0.583709
30	8	57	57	Models_2_4_5_6	4810.44	0.928745	0.768806	0.0536688	0.0536688	0.0557734	0.0605201	0.139708	0.268642	0.509667	0.649927	0.0605201	0.649927
30	8	58	58	Models_2_2_3	1459.03	0.877505	0.632681	0.0536688	0.0536688	0.0536688	0.0557734	0.0580499	0.0973913	0.246743	0.501425	0.19771	0.501425
30	8	59	59	Models_2_2_4	1430.6	0.886852	0.664036	0.0536688	0.0536688	0.0547009	0.0557734	0.0568889	0.132665	0.376335	0.540217	0.236976	0.540217
30	8	60	60	Models_2_2_5	4145.26	0.925221	0.752679	0.0536688	0.0547009	0.0557734	0.0975561	0.138769	0.239548	0.468148	0.600698	0.289231	0.600698
30	8	61	61	Models_2_2_6	1428.02	0.85526	0.597847	0.0536688	0.0536688	0.0536688	0.0547009	0.0580499	0.0922451	0.299337	0.482657	0.194545	0.482657
30	8	62	62	Models_2_3_4	1464.1	0.892423	0.667002	0.0536688	0.0536688	0.0536688	0.0547009	0.0580499	0.167725	0.368539	0.564279	0.0536688	0.564279
30	8	63	63	Models_2_3_5	4346.79	0.923279	0.732941	0.0536688	0.0547009	0.0557734	0.0975561	0.138769	0.215488	0.421915	0.649718	0.557281	0.649718
30	8	64	64	Models_2_3_6	1548.78	0.855486	0.562044	0.0536688	0.0536688	0.0536688	0.0547009	0.0568889	0.161503	0.194529	0.477627	0.286561	0.477627
30	8	65	65	Models_2_4_5	4419.81	0.929949	0.773855	0.0536688	0.0547009	0.0557734	0.0592593	0.139708	0.264483	0.453203	0.602072	0.395202	0.602072
30	8	66	66	Models_2_4_6	1548.85	0.870614	0.63747	0.0536688	0.0536688	0.0536688	0.0536688	0.10235	0.186566	0.367143	0.60855	0.0536688	0.60855
30	8	67	67	Models_2_5_6	4376.4	0.902411	0.690748	0.0536688	0.0536688	0.0547009	0.0605201	0.171123	0.29602	0.526502	0.600401	0.141684	0.600401
30	8	68	68	Models_2_2	824.045	0.846834	0.595648	0.0536688	0.0536688	0.0536688	0.0547009	0.0932462	0.125575	0.365458	0.53286	0.0960757	0.53286
30	8	69	69	Models_2_3	833.8	0.850798	0.562699	0.0536688	0.0536688	0.0536688	0.0536688	0.0568889	0.133169	0.326984	0.294684	0.0536688	0.326984
30	8	70	70	Models_2_4	814.936	0.853168	0.616297	0.0536688	0.0536688	0.0536688	0.0557734	0.0632099	0.186854	0.446944	0.547535	0.0536688	0.547535
30	8	71	71	Models_2_5	3649.01	0.900412	0.690375	0.0536688	0.0536688	0.0536688	0.0568889	0.104153	0.429149	0.541252	0.0536688	0.0536688	0.541252
30	8	72	72	Models_2_6	838.541	0.621991	0.240143	0.0536688	0.0536688	0.0536688	0.0536688	0.155194	0.0712644	0.22539	0.0488017	0.0536688	0.22539
30	8	73	73	Models_1_2	722.852	0.830501	0.587725	0.0920368	0.0985089	0.274892	0.498937	0.503238	0.324488	0.199747	0.136192	0.0557734	0.503238
30	8	74	74	Models_1_3	722.477	0.851782	0.577508	0.0547009	0.136526	0.455469	0.422222	0.309708	0.221486	0.0948148	0.0547009	0.0536688	0.455469
30	8	75	75	Models_1_4	732.915	0.813799	0.573474	0.0580499	0.225377	0.268435	0.281427	0.389401	0.475732	0.49692	0.345284	0.168183	0.49692
30	8	76	76	Models_1_5	727.934	0.858095	0.610061	0.0547009	0.0661499	0.360774	0.617338	0.675113	0.469371	0.202798	0.101342	0.0536688	0.675113
30	8	77	77	Models_1_6	732.06	0.570034	0.213779	0.0536688	0.0815012	0.315011	0.0916078	0.0536688	0.0536688	0.0536688	0.0536688	0.0536688	0.315011
30	8	78	78	Models_1_7	724.703	0.873145	0.640805	0.0557734	0.171123	0.351302	0.592852	0.701833	0.532259	0.398085	0.136861	0.0547009	0.701833
30	8	79	79	Models_1_8	738.671	0.874484	0.646921	0.0592593	0.17435	0.357518	0.53794	0.619939	0.501844	0.342513	0.136861	0.0547009	0.619939
30	8	80	80	Models_1_9	725.826	0.801374	0.467165	0.135758	0.426851	0.53037	0.550842	0.363723	0.288386	0.166346	0.0987654	0.0536688	0.550842
30	8	81	81	Models_1_10	725.099	0.878796	0.64445	0.0580499	0.203636	0.334316	0.517195	0.589556	0.476712	0.309609	0.136574	0.0536688	0.589556
30	9	82	82	Models_3_2_3_4_5_6	6500.49	0.868955	0.552138	0.0222222	0.0222222	0.0222222	0.0236407	0.0277778	0.225037	0.436545	0.598065	0.423413	0.598065
30	9	83	83	Models_3_2_3_4_5	5754.28	0.870054	0.554498	0.0222222	0.0222222	0.0222222	0.0236407	0.0271003	0.204981	0.368889	0.467418	0.248229	0.467418
30	9	84	84	Models_3_2_3_4_6	3013.5	0.831934	0.509521	0.0222222	0.0222222	0.0222222	0.0222222	0.0241546	0.167003	0.355552	0.459697	0.0435556	0.459697
30	9	85	85	Models_3_2_3_5_6	5769.3	0.865133	0.544986	0.0222222	0.0222222	0.0222222	0.0231481	0.0271003	0.224731	0.41487	0.532343	0.453521	0.532343
30	9	86	86	Models_3_2_4_5_6	5755.19	0.870794	0.55559	0.0222222	0.0222222	0.0222222	0.0236407	0.026455	0.174114	0.390741	0.473098	0.272072	0.473098
30	9	87	87	Models_3_3_4_5_6	5769.93	0.864146	0.542309	0.0222222	0.0222222	0.0222222	0.0226757	0.0940619	0.192593	0.400585	0.449586	0.177368	0.449586
30	9	88	88	Models_3_2_3_4	2250	0.830595	0.510796	0.0222222	0.0222222	0.0222222	0.0222222	0.0671156	0.0732594	0.355141	0.559596	0.2271	0.559596
30	9	89	89	Models_3_2_3_5	4933.12	0.862324	0.538042	0.0222222	0.0222222	0.0222222	0.0241546	0.0690697	0.23014	0.368201	0.44519	0.23997	0.44519
30	9	90	90	Models_3_2_3_6	2193.54	0.810933	0.47228	0.0222222	0.0222222	0.0222222	0.0222222	0.0241546	0.204268	0.368738	0.469118	0.22069	0.469118
30	9	91	91	Models_3_2_4_5	4929.86	0.868056	0.551757	0.0222222	0.0222222	0.0222222	0.0236407	0.026455	0.203704	0.391605	0.467418	0.181555	0.467418
30	9	92	92	Models_3_2_4_6	2283.72	0.830207	0.507474	0.0222222	0.0222222	0.0222222	0.0222222	0.0236407	0.199482	0.344468	0.556566	0.226311	0.556566
30	9	93	93	Models_3_2_5_6	5157.87	0.861087	0.534494	0.0222222	0.0222222	0.0222222	0.0241546	0.0271003	0.252134	0.45952	0.433109	0.396093	0.45952
30	9	94	94	Models_3_3_4_5	5082.75	0.856732	0.523083	0.0222222	0.0222222	0.0222222	0.0231481	0.136182	0.188852	0.445626	0.47788	0.0418803	0.47788
30	9	95	95	Models_3_3_4_6	2395.31	0.806271	0.461598	0.0222222	0.0222222	0.0222222	0.0222222	0.0671156	0.161332	0.389922	0.383224	0.0814815	0.389922
30	9	96	96	Models_3_3_5_6	4979.3	0.849567	0.504942	0.0222222	0.0222222	0.0222222	0.0222222	0.0516784	0.21564	0.422143	0.427185	0.162158	0.427185
30	9	97	97	Models_3_4_5_6	4993.48	0.854801	0.521418	0.0222222	0.0222222	0.0226757	0.0236407	0.171823	0.160195	0.394572	0.45254	0.160433	0.45254
30	9	98	98	Models_3_2_3	1570.51	0.81219	0.473681	0.0222222	0.0222222	0.0222222	0.0222222	0.0671156	0.13183	0.310735	0.401252	0.342906	0.401252
30	9	99	99	Models_3_2_4	1665.82	0.828287	0.50493	0.0222222	0.0222222	0.0222222	0.0222222	0.0246914	0.199482	0.310741	0.524192	0.195523	0.524192
30	9	100	100	Models_3_2_5	4317.01	0.861787	0.534388	0.0222222	0.0222222	0.0222222	0.0231481	0.0683575	0.254815	0.366116	0.368684	0.0869154	0.368684
30	9	101	101	Models_3_2_6	1589.79	0.800472	0.434622	0.0222222	0.0222222	0.0222222	0.0222222	0.0236407	0.197699	0.365796	0.455843	0.0418803	0.455843
30	9	102	102	Models_3_3_4	1638.39	0.803339	0.462808	0.0222222	0.0222222	0.0222222	0.0222222	0.0671156	0.171942	0.370833	0.400033	0.0854321	0.400033
30	9	103	103	Models_3_3_5	4514.56	0.843233	0.497904	0.0222222	0.0222222	0.0222222	0.0231481	0.0936661	0.238704	0.42341	0.429338	0.242781	0.429338
30	9	104	104	Models_3_3_6	1594.17	0.730622	0.332079	0.0222222	0.0222222	0.0222222	0.0222222	0.0226757	0.266	0.238747	0.411049	0.0418803	0.411049
30	9	105	105	Models_3_4_5	4275.36	0.850978	0.51578	0.0222222	0.0222222	0.0222222	0.0246914	0.163953	0.195831	0.447947	0.407906	0.150444	0.447947
30	9	106	106	Models_3_4_6	1598.66	0.787434	0.422166	0.0222222	0.0222222	0.0222222	0.0226757	0.0665788	0.217792	0.369029	0.324751	0.0418803	0.369029
30	9	107	107	Models_3_5_6	4327.85	0.829278	0.467086	0.0222222	0.0222222	0.0222222	0.0574879	0.107808	0.193452	0.286869	0.418881	0.226984	0.418881
30	9	108	108	Models_3_2	923.495	0.801648	0.444127	0.0222222	0.0222222	0.0222222	0.0226757	0.0660649	0.13268	0.401628	0.4585	0.188058	0.4585
30	9	109	109	Models_3_3	910.026	0.721754	0.321631	0.0222222	0.0222222	0.0222222	0.0222222	0.0231481	0.0932845	0.344255	0.0418803	0.0418803	0.344255
30	9	110	110	Models_3_4	884.744	0.770629	0.408473	0.0222222	0.0222222	0.0222222	0.0226757	0.0695245	0.309703	0.370941	0.36398	0.0435556	0.370941
30	9	111	111	Models_3_5	3594.51	0.827773	0.461387	0.0222222	0.0222222	0.0222222	0.0241546	0.104697	0.222199	0.394167	0.452125	0.0418803	0.452125
30	9	112	112	Models_3_6	813.734	0.563314	0.172789	0.0222222	0.0222222	0.0222222	0.0181406	0.133288	0.0418803	0.0418803	0.0418803	0.0418803	0.133288
30	9	124	124	Models_2_2_3_4_5_6	7572.27	0.890045	0.607999	0.0222222	0.0222222	0.0222222	0.0241546	0.071664	0.243139	0.349287	0.469867	0.414926	0.469867
30	9	125	125	Models_2_2_3_4_5	6698.75	0.877574	0.559167	0.0222222	0.0222222	0.0222222	0.0231481	0.070202	0.230389	0.460681	0.372396	0.0418803	0.460681
30	9	126	126	Models_2_2_3_4_6	3470.56	0.848064	0.540354	0.0222222	0.0222222	0.0222222	0.0236407	0.020202	0.18963	0.320864	0.505223	0.169068	0.505223
30	9	127	127	Models_2_2_3_5_6	6772.27	0.879605	0.575823	0.0222222	0.0222222	0.0222222	0.0236407	0.0706097	0.261331	0.462851	0.469335	0.413355	0.469335
30	9	128	128	Models_2_2_4_5_6	6698.26	0.876656	0.566002	0.0222222	0.0222222	0.0222222	0.0231481	0.108937	0.196339	0.436898	0.447119	0.1551	0.447119
30	9	129	129	Models_2_3_4_5_6	6510.56	0.873071	0.552877	0.0222222	0.0222222	0.0222222	0.0236407	0.111189	0.212149	0.418567	0.428868	0.0854321	0.428868
30	9	130	130	Models_2_2_3_4	2536.92	0.847124	0.529369	0.0222222	0.0222222	0.0222222	0.0226757	0.0252525	0.167868	0.346962	0.536914	0.155164	0.536914
30	9	131	131	Models_2_2_3_5	5891.1	0.878251	0.56869	0.0222222	0.0222222	0.0222222	0.0236407	0.0706097	0.295444	0.447644	0.470512	0.352099	0.470512
30	9	132	132	Models_2_2_3_6	2620.65	0.827917	0.487171	0.0222222	0.0222222	0.0222222	0.0185185	0.0530864	0.129039	0.287918	0.401681	0.123527	0.401681
30	9	133	133	Models_2_2_4_5	5913.18	0.873253	0.555411	0.0222222	0.0222222	0.0222222	0.0231481	0.106268	0.268845	0.439634	0.395906	0.238945	0.439634
30	9	134	134	Models_2_2_4_6	2672.23	0.844556	0.529103	0.0222222	0.0222222	0.0222222	0.0236407	0.0246914	0.188658	0.304674	0.532964	0.125406	0.532964
30	9	135	135	Models_2_2_5_6	5871.15	0.873664	0.555107	0.0222222	0.0222222	0.0222222	0.0226757	0.0271003	0.346525	0.439363	0.410076	0.0427015	0.439363
30	9	136	136	Models_2_3_4_5	5893.65	0.875584	0.566304	0.0222222	0.0222222	0.0222222	0.0246914	0.145906	0.212149	0.448387	0.446789	0.443863	0.448387
30	9	137	137	Models_2_3_4_6	2599.05	0.849444	0.531999	0.0222222	0.0222222	0.0222222	0.0226757	0.0236407	0.125397	0.365667	0.423792	0.1951	0.423792
30	9	138	138	Models_2_3_5_6	5979.48	0.868073	0.546919	0.0222222	0.0222222	0.0222222	0.0231481	0.110399	0.231047	0.44101	0.444455	0.396093	0.444455
30	9	139	139	Models_2_4_5_6	5991.74	0.859663	0.527184	0.0222222	0.0222222	0.0222222	0.0231481	0.0946765	0.162406	0.4186	0.485141	0.082963	0.485141
30	9	140	140	Models_2_2_3	1793.75	0.830479	0.503685	0.0222222	0.0222222	0.0222222	0.0226757	0.141406	0.0956427	0.249538	0.455096	0.0483951	0.455096
30	9	141	141	Models_2_2_4	1764.05	0.843769	0.525432	0.0222222	0.0222222	0.0222222	0.0226757	0.0246914	0.167892	0.396605	0.364806	0.0418803	0.396605
30	9	142	142	Models_2_2_5	5064.36	0.87083	0.54557	0.0222222	0.0222222	0.0222222	0.0236407	0.0271003	0.252751	0.416162	0.394419	0.123457	0.416162
30	9	143	143	Models_2_2_6	1912.15	0.818493	0.465828	0.0222222	0.0222222	0.0222222	0.0226757	0.100449	0.125658	0.208395	0.43794	0.0444444	0.43794
30	9	144	144	Models_2_3_4	1884.63	0.831826	0.499719	0.0222222	0.0222222	0.0222222	0.0222222	0.068264	0.20651	0.424627	0.486391	0.152913	0.486391
30	9	145	145	Models_2_3_5	5189.44	0.862688	0.531728	0.0222222	0.0222222	0.0222222	0.0231481	0.107018	0.242034	0.436679	0.420199	0.332716	0.436679
30	9	146	146	Models_2_3_6	1744.65	0.774514	0.388697	0.0222222	0.0222222	0.0222222	0.0181406	0.0181406	0.0913131	0.274113	0.344124	0.0453704	0.344124
30	9	147	147	Models_2_4_5	4887.45	0.859026	0.535276	0.0222222	0.0222222	0.0222222	0.0231481	0.071664	0.187802	0.353404	0.526772	0.247642	0.526772
30	9	148	148	Models_2_4_6	1722.89	0.800186	0.460688	0.0222222	0.0222222	0.0222222	0.0222222	0.0660649	0.167219	0.482711	0.440061	0.0418803	0.482711
30	9	149	149	Models_2_5_6	4862.91	0.834924	0.484231	0.0222222	0.0222222	0.0222222	0.0612434	0.106268	0.192298	0.419776	0.503189	0.345308	0.503189
30	9	150	150	Models_2_2	901.399	0.817983	0.4892	0.0222222	0.0222222	0.0222222	0.0226757	0.0660649	0.135128	0.293501	0.543985	0.0463357	0.543985
30	9	151	151	Models_2_3	926.426	0.781266	0.398504	0.0222222	0.0222222	0.0222222	0.0222222	0.0651	0.0551704	0.343076	0.32716	0.0418803	0.343076
30	9	152	152	Models_2_4	916.697	0.806068	0.467523	0.0222222	0.0222222	0.0222222	0.0222222	0.0660649	0.208682	0.354609	0.439167	0.0418803	0.439167
30	9	153	153	Models_2_5	4078.09	0.831244	0.475933	0.0222222	0.0222222	0.0222222	0.0236407	0.134246	0.159031	0.398185	0.480718	0.0418803	0.480718
30	9	154	154	Models_2_6	908.653	0.578769	0.189428	0.0222222	0.0222222	0.0181406	0.0181406	0.0934898	0.144602	0.0418803	0.0418803	0.0418803	0.144602
30	9	155	155	Models_1_2	714.761	0.801373	0.443059	0.0226757	0.13268	0.46832	0.401308	0.372077	0.0483951	0.0427015	0.0418803	0.0418803	0.46832
30	9	156	156	Models_1_3	711.549	0.707483	0.329853	0.0651	0.0236407	0.306972	0.297579	0.0814815	0.0427015	0.0418803	0.0418803	0.0418803	0.306972
30	9	157	157	Models_1_4	719.991	0.765077	0.412916	0.0222222	0.0676768	0.33978	0.39799	0.480394	0.251458	0.184127	0.0833727	0.0427015	0.480394
30	9	158	158	Models_1_5	715.458	0.746916	0.385918	0.106598	0.197919	0.353723	0.382469	0.451968	0.217319	0.157227	0.0435556	0.0418803	0.451968
30	9	159	159	Models_1_6	718.685	0.557292	0.187521	0.084249	0.260506	0.123148	0.0837272	0.0418803	0.0418803	0.0418803	0.0418803	0.0418803	0.260506
30	9	160	160	Models_1_7	713.036	0.792683	0.426163	0.10416	0.28774	0.467306	0.4612	0.230087	0.246672	0.121713	0.0435556	0.0418803	0.467306
30	9	161	161	Models_1_8	725.979	0.790953	0.41847	0.0222222	0.166902	0.328309	0.458814	0.488702	0.37118	0.241232	0.0842925	0.0427015	0.488702
30	9	162	162	Models_1_9	712.444	0.786531	0.421995	0.10416	0.223405	0.489758	0.41211	0.333514	0.243777	0.0846763	0.0418803	0.0418803	0.489758
30	9	163	163	Models_1_10	729.65	0.796204	0.434398	0.0591962	0.367961	0.466315	0.414815	0.208195	0.246795	0.190236	0.121296	0.0418803	0.466315
30	10	164	164	Models_3_2_3_4_5_6	7574.6	0.933161	0.752918	0.0536688	0.0536688	0.093	0.0953086	0.145774	0.241877	0.36706	0.625589	0.398562	0.625589
30	10	165	165	Models_3_2_3_4_5	6815.68	0.930687	0.744026	0.0536688	0.0536688	0.0920368	0.0953086	0.209949	0.277581	0.34164	0.577135	0.49892	0.577135
30	10	166	166	Models_3_2_3_4_6	3649.53	0.905715	0.676065	0.0536688	0.0536688	0.0557734	0.0965684	0.0935354	0.255151	0.266637	0.563604	0.343116	0.563604
30	10	167	167	Models_3_2_3_5_6	6894.71	0.931057	0.750127	0.0536688	0.0536688	0.0920368	0.0953086	0.132073	0.239503	0.398386	0.602134	0.650306	0.650306
30	10	168	168	Models_3_2_4_5_6	6826.91	0.926468	0.740677	0.0536688	0.0547009	0.0953704	0.130732	0.209868	0.237306	0.389788	0.625589	0.498649	0.625589
30	10	169	169	Models_3_3_4_5_6	5866.38	0.927167	0.732404	0.0536688	0.0536688	0.0557734	0.0954074	0.0952381	0.256396	0.347003	0.599893	0.442547	0.599893
30	10	170	170	Models_3_2_3_4	2255.04	0.901802	0.656092	0.0536688	0.0536688	0.0557734	0.0954074	0.0939345	0.291915	0.308995	0.533346	0.0960317	0.533346
30	10	171	171	Models_3_2_3_5	5157.53	0.929662	0.741992	0.0536688	0.0536688	0.0557734	0.0939345	0.132042	0.27585	0.37128	0.561196	0.434032	0.561196
30	10	172	172	Models_3_2_3_6	2302.29	0.896403	0.656506	0.0536688	0.0536688	0.0557734	0.093	0.124029	0.281055	0.263523	0.498905	0.510356	0.510356
30	10	173	173	Models_3_2_4_5	5155.98	0.924667	0.730253	0.0536688	0.0536688	0.0568889	0.130546	0.210317	0.263444	0.443059	0.619459	0.0960317	0.619459
30	10	174	174	Models_3_2_4_6	2345.6	0.887705	0.62892	0.0536688	0.0536688	0.0547009	0.0926189	0.172671	0.238681	0.452634	0.471748	0.433649	0.471748
30	10	175	175	Models_3_2_5_6	5209.97	0.924308	0.74031	0.0536688	0.0536688	0.0920368	0.131167	0.212909	0.289899	0.36904	0.546913	0.553343	0.553343
30	10	176	176	Models_3_3_4_5	5223.7	0.925352	0.726747	0.0536688	0.0536688	0.0557734	0.0965684	0.0970085	0.277581	0.343767	0.546641	0.44147	0.546641
30	10	177	177	Models_3_3_4_6	2376	0.888488	0.6289	0.0536688	0.0536688	0.0547009	0.0954074	0.126033	0.119753	0.324712	0.578858	0.4304	0.578858
30	10	178	178	Models_3_3_5_6	5193.68	0.923954	0.72324	0.0536688	0.0536688	0.0547009	0.093	0.0935354	0.179568	0.335862	0.537905	0.456992	0.537905
30	10	179	179	Models_3_4_5_6	5212.9	0.911778	0.700339	0.0536688	0.0536688	0.0557734	0.0936192	0.21266	0.210236	0.341674	0.725221	0.372479	0.725221
30	10	180	180	Models_3_2_3	1643.35	0.893517	0.648101	0.0536688	0.0536688	0.0547009	0.0954074	0.124029	0.277487	0.208921	0.596998	0.0960317	0.596998
30	10	181	181	Models_3_2_4	1710.39	0.883758	0.628522	0.0536688	0.0536688	0.0547009	0.0926189	0.201728	0.262047	0.505841	0.459636	0.105447	0.505841
30	10	182	182	Models_3_2_5	4485.57	0.921397	0.731143	0.0536688	0.0547009	0.0580499	0.130601	0.1825	0.313468	0.367779	0.610034	0.536933	0.610034
30	10	183	183	Models_3_2_6	1598.76	0.867996	0.594169	0.0536688	0.0536688	0.0547009	0.0954074	0.158769	0.235642	0.365944	0.546963	0.290783	0.546963
30	10	184	184	Models_3_3_4	1583.12	0.887694	0.630494	0.0536688	0.0536688	0.0547009	0.0954074	0.0953704	0.197116	0.343526	0.546605	0.38161	0.546605
30	10	185	185	Models_3_3_5	4519.17	0.922603	0.720071	0.0536688	0.0536688	0.0547009	0.0557734	0.0939875	0.22088	0.36515	0.577135	0.292333	0.577135
30	10	186	186	Models_3_3_6	1770.21	0.868123	0.571148	0.0536688	0.0536688	0.0536688	0.0547009	0.130272	0.162643	0.326222	0.0960317	0.0960317	0.326222
30	10	187	187	Models_3_4_5	4568.69	0.907325	0.693218	0.0536688	0.0536688	0.0557734	0.0939345	0.211299	0.26632	0.375514	0.704031	0.434181	0.704031
30	10	188	188	Models_3_4_6	1695.26	0.821766	0.538619	0.0536688	0.0536688	0.0536688	0.0536688	0.12025	0.304992	0.374368	0.470353	0.31656	0.470353
30	10	189	189	Models_3_5_6	4574.23	0.900954	0.672576	0.0536688	0.0536688	0.0547009	0.0926189	0.17578	0.198718	0.341512	0.578808	0.356335	0.578808
30	10	190	190	Models_3_2	872.221	0.860684	0.564015	0.0536688	0.0536688	0.0547009	0.0926189	0.20382	0.265797	0.435456	0.469619	0.0960317	0.469619
30	10	191	191	Models_3_3	885.76	0.865763	0.568258	0.0536688	0.0536688	0.0536688	0.0547009	0.130272	0.162643	0.290653	0.501741	0.0960317	0.501741
30	10	192	192	Models_3_4	885.467	0.802412	0.512463	0.0536688	0.0536688	0.0536688	0.0547009	0.171417	0.409324	0.464029	0.0960317	0.0960317	0.464029
30	10	193	193	Models_3_5	3830.04	0.892712	0.642859	0.0536688	0.0536688	0.0547009	0.0605201	0.212951	0.296713	0.318146	0.590767	0.291481	0.590767
30	10	194	194	Models_3_6	897.323	0.663984	0.258113	0.0536688	0.0536688	0.0536688	0.0536688	0.228529	0.274153	0.294494	0.0960317	0.0960317	0.294494
30	10	206	206	Models_2_2_3_4_5_6	6482.35	0.935127	0.763205	0.0536688	0.0547009	0.0970433	0.0954074	0.111852	0.213357	0.370159	0.519605	0.48854	0.519605
30	10	207	207	Models_2_2_3_4_5	5771.75	0.937083	0.771652	0.0536688	0.0547009	0.0970433	0.0954074	0.110117	0.181096	0.419337	0.517119	0.460583	0.517119
30	10	208	208	Models_2_2_3_4_6	2952.11	0.90797	0.678578	0.0536688	0.0547009	0.0970433	0.0954074	0.0950388	0.208833	0.344742	0.644081	0.0977778	0.644081
30	10	209	209	Models_2_2_3_5_6	5789.55	0.934089	0.760979	0.0536688	0.0536688	0.0942919	0.094161	0.0711111	0.269069	0.339605	0.540764	0.161728	0.540764
30	10	210	210	Models_2_2_4_5_6	5803.39	0.92736	0.743095	0.0536688	0.0536688	0.093	0.0981587	0.0729345	0.235271	0.444429	0.587248	0.383785	0.587248
30	10	211	211	Models_2_3_4_5_6	5805.59	0.925653	0.722682	0.0536688	0.0536688	0.0942919	0.0954074	0.105387	0.213179	0.413169	0.569272	0.352929	0.569272
30	10	212	212	Models_2_2_3_4	2242.92	0.903234	0.666499	0.0536688	0.0547009	0.0970433	0.130272	0.0618357	0.137631	0.212645	0.440857	0.430954	0.440857
30	10	213	213	Models_2_2_3_5	4842.61	0.932488	0.75516	0.0536688	0.0547009	0.0970433	0.0932462	0.111852	0.270661	0.371523	0.461744	0.55489	0.55489
30	10	214	214	Models_2_2_3_6	2158.22	0.896843	0.644554	0.0536688	0.0547009	0.0970433	0.130272	0.0632099	0.171984	0.237906	0.464021	0.308561	0.464021
30	10	215	215	Models_2_2_4_5	4889.61	0.932318	0.758269	0.0536688	0.0536688	0.093	0.0965684	0.0748538	0.24554	0.448299	0.537364	0.261888	0.537364
30	10	216	216	Models_2_2_4_6	2118.9	0.893039	0.636796	0.0536688	0.0536688	0.093	0.0592593	0.0953086	0.199298	0.314427	0.539	0.283336	0.539
30	10	217	217	Models_2_2_5_6	4961.08	0.929638	0.751569	0.0536688	0.0536688	0.0942919	0.0920988	0.103344	0.263924	0.397385	0.556349	0.3469	0.556349
30	10	218	218	Models_2_3_4_5	4924.7	0.92817	0.740518	0.0536688	0.0547009	0.0970433	0.0954074	0.102576	0.145036	0.394038	0.557746	0.466855	0.557746
30	10	219	219	Models_2_3_4_6	2187.91	0.89387	0.636496	0.0536688	0.0547009	0.0970433	0.0970433	0.13436	0.172993	0.208653	0.522383	0.317687	0.522383
30	10	220	220	Models_2_3_5_6	4966.9	0.922845	0.716547	0.0536688	0.0536688	0.0547009	0.0970433	0.0920988	0.218155	0.315767	0.481727	0.424388	0.481727
30	10	221	221	Models_2_4_5_6	4930.7	0.915107	0.709297	0.0536688	0.0536688	0.0959707	0.0954074	0.0950558	0.158874	0.43188	0.713233	0.103419	0.713233
30	10	222	222	Models_2_2_3	1455	0.889525	0.629781	0.0536688	0.0536688	0.0547009	0.130272	0.0605201	0.170792	0.518751	0.407908	0.0960317	0.518751
30	10	223	223	Models_2_2_4	1496.54	0.896488	0.655671	0.0536688	0.0536688	0.093	0.0981587	0.106891	0.238557	0.385942	0.496858	0.0960317	0.496858
30	10	224	224	Models_2_2_5	4435.19	0.922095	0.734818	0.0536688	0.0536688	0.0942919	0.094507	0.103344	0.263924	0.418711	0.490236	0.450135	0.490236
30	10	225	225	Models_2_2_6	1475.67	0.880767	0.62077	0.0536688	0.0536688	0.0959707	0.0920368	0.130546	0.232492	0.44127	0.59701	0.18294	0.59701
30	10	226	226	Models_2_3_4	1472.33	0.894072	0.649044	0.0536688	0.0536688	0.0547009	0.0970433	0.0939345	0.140564	0.321058	0.556505	0.0960317	0.556505
30	10	227	227	Models_2_3_5	4298.84	0.923527	0.712461	0.0536688	0.0536688	0.0547009	0.0970433	0.0920988	0.181558	0.368984	0.525926	0.31716	0.525926
30	10	228	228	Models_2_3_6	1453.53	0.867607	0.56352	0.0536688	0.0536688	0.0547009	0.0547009	0.130272	0.174799	0.168677	0.455263	0.0960317	0.455263
30	10	229	229	Models_2_4_5	4247.34	0.917287	0.724938	0.0536688	0.0536688	0.0942919	0.0932462	0.0618357	0.122011	0.394038	0.547419	0.588115	0.588115
30	10	230	230	Models_2_4_6	1454.12	0.837516	0.52955	0.0536688	0.0536688	0.0547009	0.134902	0.103951	0.162852	0.396967	0.487566	0.246592	0.487566
30	10	231	231	Models_2_5_6	4237.98	0.894394	0.634994	0.0536688	0.0536688	0.0536688	0.0568889	0.0960456	0.304585	0.355512	0.493112	0.0960317	0.493112
30	10	232	232	Models_2_2	747.418	0.874513	0.623486	0.0536688	0.0536688	0.0942919	0.0954074	0.0632099	0.215083	0.393796	0.547228	0.380673	0.547228
30	10	233	233	Models_2_3	796.061	0.868583	0.589376	0.0536688	0.0536688	0.0547009	0.0547009	0.16122	0.136563	0.144444	0.388222	0.0977778	0.388222
30	10	234	234	Models_2_4	824.319	0.828213	0.534066	0.0536688	0.0536688	0.0547009	0.0557734	0.0958227	0.23138	0.398895	0.579818	0.17524	0.579818
30	10	235	235	Models_2_5	3652.04	0.894146	0.65019	0.0536688	0.0536688	0.0536688	0.0568889	0.0960456	0.322703	0.305561	0.639764	0.114421	0.639764
30	10	236	236	Models_2_6	741.103	0.661398	0.259021	0.0536688	0.0536688	0.0536688	0.0547009	0.180169	0.141722	0.201893	0.0960317	0.0960317	0.201893
30	10	237	237	Models_1_2	731.531	0.860967	0.576566	0.0926189	0.143373	0.389379	0.53256	0.490166	0.426477	0.340872	0.187654	0.101468	0.53256
30	10	238	238	Models_1_3	723.193	0.865939	0.574529	0.130272	0.158928	0.32673	0.488469	0.528076	0.345309	0.212424	0.107556	0.0960317	0.528076
30	10	239	239	Models_1_4	728.38	0.80483	0.525161	0.0557734	0.202168	0.361241	0.392	0.435278	0.438732	0.346125	0.211714	0.103419	0.438732
30	10	240	240	Models_1_5	719.214	0.842672	0.56413	0.0536688	0.0907231	0.286921	0.49056	0.690899	0.431276	0.228135	0.107556	0.0960317	0.690899
30	10	241	241	Models_1_6	735.246	0.663712	0.261756	0.0929705	0.261693	0.342404	0.125432	0.137579	0.0960317	0.0960317	0.0960317	0.0960317	0.342404
30	10	242	242	Models_1_7	724.962	0.85709	0.567564	0.0547009	0.183568	0.234113	0.394975	0.582846	0.493372	0.408931	0.109751	0.0960317	0.582846
30	10	243	243	Models_1_8	728.193	0.826827	0.523563	0.0547009	0.23874	0.428523	0.5602	0.252209	0.103419	0.0960317	0.0960317	0.0960317	0.5602
30	10	244	244	Models_1_9	724.999	0.871787	0.612297	0.0580499	0.212207	0.334203	0.442142	0.518841	0.628491	0.409371	0.114421	0.0960317	0.628491
30	10	245	245	Models_1_10	720.857	0.866103	0.586018	0.0990386	0.260375	0.547692	0.61037	0.199153	0.101468	0.0960317	0.0960317	0.0960317	0.61037
80	8	246	246	Models_3_2_3_4_5_6	2976.95	0.934177	0.83838	0.0557734	0.0580499	0.106667	0.20152	0.415329	0.683539	0.794435	0.606486	0.293167	0.794435
80	8	247	247	Models_3_2_3_4_5	2661.87	0.930459	0.825141	0.0536688	0.0557734	0.0592593	0.151787	0.471957	0.740384	0.570469	0.234042	0.0536688	0.740384
80	8	248	248	Models_3_2_3_4_6	1380.73	0.913407	0.799094	0.0547009	0.0557734	0.133125	0.178168	0.386336	0.526055	0.622095	0.543798	0.281332	0.622095
80	8	249	249	Models_3_2_3_5_6	2665.44	0.931109	0.829357	0.0557734	0.0580499	0.10328	0.235547	0.453462	0.657781	0.770239	0.561652	0.294699	0.770239
80	8	250	250	Models_3_2_4_5_6	2660.72	0.933968	0.845215	0.0568889	0.0953704	0.132445	0.236003	0.453975	0.699811	0.77142	0.642892	0.364979	0.77142
80	8	251	251	Models_3_3_4_5_6	2669.76	0.923204	0.804618	0.0536688	0.0557734	0.0966862	0.201863	0.452587	0.615071	0.755079	0.479953	0.0536688	0.755079
80	8	252	252	Models_3_2_3_4	1037.94	0.914217	0.802067	0.0547009	0.0568889	0.133929	0.13679	0.369676	0.526055	0.707516	0.511758	0.226793	0.707516
80	8	253	253	Models_3_2_3_5	2345.24	0.929791	0.825691	0.0557734	0.0592593	0.149868	0.236003	0.470971	0.633144	0.815704	0.631501	0.364979	0.815704
80	8	254	254	Models_3_2_3_6	1036.86	0.90212	0.777646	0.0536688	0.0557734	0.0592593	0.159012	0.31473	0.461835	0.575044	0.512091	0.137327	0.575044
80	8	255	255	Models_3_2_4_5	2322.09	0.932114	0.841286	0.0557734	0.0605201	0.200296	0.264212	0.510774	0.72591	0.767769	0.61025	0.342162	0.767769
80	8	256	256	Models_3_2_4_6	1034.36	0.908204	0.796137	0.0536688	0.0580499	0.133125	0.222498	0.418525	0.510154	0.642484	0.588166	0.364278	0.642484
80	8	257	257	Models_3_2_5_6	2276.53	0.927636	0.824882	0.0547009	0.0580499	0.10849	0.286186	0.538646	0.702177	0.794086	0.519631	0.316851	0.794086
80	8	258	258	Models_3_3_4_5	2284.66	0.92581	0.816072	0.0557734	0.0580499	0.133066	0.237076	0.425562	0.53924	0.726056	0.710034	0.323553	0.726056
80	8	259	259	Models_3_3_4_6	1015.1	0.879237	0.737689	0.0536688	0.0547009	0.091358	0.17351	0.246481	0.367718	0.442963	0.551064	0.270797	0.551064
80	8	260	260	Models_3_3_5_6	2277.93	0.916589	0.783298	0.0536688	0.0557734	0.0592593	0.134483	0.402672	0.59124	0.753185	0.505389	0.0536688	0.753185
80	8	261	261	Models_3_4_5_6	2276.53	0.921122	0.815161	0.0536688	0.0568889	0.132665	0.202469	0.429721	0.61003	0.749908	0.59497	0.108883	0.749908
80	8	262	262	Models_3_2_3	704.346	0.900082	0.770329	0.0536688	0.0557734	0.101089	0.158655	0.36884	0.490733	0.575303	0.495452	0.222579	0.575303
80	8	263	263	Models_3_2_4	705.247	0.908786	0.800645	0.0536688	0.0580499	0.133169	0.18112	0.404503	0.507079	0.659722	0.610298	0.293167	0.659722
80	8	264	264	Models_3_2_5	1955.95	0.928304	0.82685	0.0557734	0.0592593	0.10849	0.263165	0.464354	0.702177	0.746657	0.54184	0.320113	0.746657
80	8	265	265	Models_3_2_6	713.411	0.887659	0.755631	0.0536688	0.0536688	0.091358	0.221368	0.305467	0.587547	0.637486	0.430833	0.0536688	0.637486
80	8	266	266	Models_3_3_4	706.231	0.87719	0.737133	0.0536688	0.0547009	0.098719	0.173	0.297747	0.392677	0.544939	0.416556	0.168502	0.544939
80	8	267	267	Models_3_3_5	1960.25	0.914654	0.782049	0.0547009	0.0580499	0.103577	0.23566	0.404768	0.540404	0.727055	0.644032	0.237155	0.727055
80	8	268	268	Models_3_3_6	711.307	0.828648	0.632122	0.0536688	0.0536688	0.0547009	0.0909295	0.227184	0.381337	0.511171	0.418765	0.166675	0.511171
80	8	269	269	Models_3_4_5	1959.24	0.921362	0.818404	0.0557734	0.0580499	0.158732	0.202469	0.429668	0.591363	0.752018	0.692986	0.230914	0.752018
80	8	270	270	Models_3_4_6	705.373	0.859418	0.7108	0.0536688	0.0536688	0.0536688	0.166548	0.290142	0.647619	0.290691	0.0536688	0.0536688	0.647619
80	8	271	271	Models_3_5_6	1961.41	0.903101	0.763774	0.0547009	0.0568889	0.0646465	0.267295	0.430193	0.567823	0.707239	0.498466	0.0957795	0.707239
80	8	272	272	Models_3_2	380.901	0.885893	0.758033	0.0536688	0.0536688	0.0580499	0.0950388	0.305467	0.59214	0.56131	0.139554	0.0536688	0.59214
80	8	273	273	Models_3_3	382.785	0.827653	0.617952	0.0536688	0.0536688	0.0557734	0.106477	0.240464	0.369558	0.5346	0.37489	0.0966862	0.5346
80	8	274	274	Models_3_4	377.369	0.850857	0.699393	0.0536688	0.0536688	0.0920368	0.137581	0.25037	0.645291	0.604106	0.414931	0.22497	0.645291
80	8	275	275	Models_3_5	1643.05	0.902053	0.765368	0.0536688	0.0547009	0.0580499	0.234227	0.479281	0.682243	0.612671	0.263906	0.0536688	0.682243
80	8	276	276	Models_3_6	385.909	0.642703	0.317489	0.0536688	0.0536688	0.0536688	0.0536688	0.10582	0.265162	0.0488017	0.0536688	0.0536688	0.265162
80	8	288	288	Models_2_2_3_4_5_6	3265.11	0.935189	0.837469	0.0557734	0.133441	0.132466	0.280776	0.433807	0.58323	0.664368	0.676085	0.316851	0.676085
80	8	289	289	Models_2_2_3_4_5	2969.73	0.934114	0.838608	0.0536688	0.0557734	0.133169	0.207292	0.434106	0.699607	0.721323	0.339479	0.0536688	0.721323
80	8	290	290	Models_2_2_3_4_6	1547.35	0.904978	0.785651	0.0536688	0.0536688	0.0920368	0.159329	0.327609	0.591279	0.612299	0.341601	0.0536688	0.612299
80	8	291	291	Models_2_2_3_5_6	2953.06	0.936201	0.843528	0.0536688	0.0963951	0.132466	0.258554	0.433807	0.572087	0.686972	0.615461	0.206644	0.686972
80	8	292	292	Models_2_2_4_5_6	2938.38	0.932602	0.836023	0.0547009	0.0580499	0.132665	0.314771	0.452525	0.599134	0.709129	0.631111	0.25918	0.709129
80	8	293	293	Models_2_3_4_5_6	2951.5	0.930032	0.817945	0.0547009	0.0557734	0.133494	0.201863	0.297146	0.626253	0.705263	0.616041	0.265144	0.705263
80	8	294	294	Models_2_2_3_4	1179	0.910895	0.786355	0.0547009	0.0568889	0.132483	0.17378	0.325698	0.457081	0.598664	0.548873	0.346432	0.598664
80	8	295	295	Models_2_2_3_5	2606.89	0.93392	0.837011	0.0557734	0.13325	0.200914	0.262026	0.415169	0.506282	0.709119	0.703014	0.383345	0.709119
80	8	296	296	Models_2_2_3_6	1161.55	0.903791	0.782309	0.0536688	0.0557734	0.135076	0.160178	0.308524	0.510425	0.553968	0.427339	0.167492	0.553968
80	8	297	297	Models_2_2_4_5	2580.65	0.933693	0.838936	0.0557734	0.0605201	0.174652	0.315222	0.416051	0.57616	0.729766	0.63219	0.341515	0.729766
80	8	298	298	Models_2_2_4_6	1156.11	0.908756	0.790444	0.0536688	0.0568889	0.132736	0.134483	0.3134	0.53731	0.621849	0.556659	0.204058	0.621849
80	8	299	299	Models_2_2_5_6	2620.29	0.92602	0.817153	0.0536688	0.0536688	0.0568889	0.13306	0.434106	0.729466	0.614956	0.0536688	0.0536688	0.729466
80	8	300	300	Models_2_3_4_5	2602.74	0.928777	0.815919	0.0547009	0.0557734	0.133169	0.235852	0.29583	0.59791	0.796365	0.616041	0.225024	0.796365
80	8	301	301	Models_2_3_4_6	1147.56	0.891519	0.753174	0.0536688	0.0557734	0.135076	0.135281	0.245645	0.395073	0.526285	0.488986	0.0580499	0.526285
80	8	302	302	Models_2_3_5_6	2579.08	0.912692	0.770758	0.0536688	0.0547009	0.0975561	0.200365	0.298595	0.633993	0.726349	0.541092	0.0536688	0.726349
80	8	303	303	Models_2_4_5_6	2594.72	0.926783	0.828576	0.0536688	0.0557734	0.102716	0.257834	0.42131	0.658095	0.749108	0.502308	0.0536688	0.749108
80	8	304	304	Models_2_2_3	780.778	0.899734	0.772148	0.0536688	0.0557734	0.133929	0.158748	0.325947	0.489308	0.550542	0.522842	0.279196	0.550542
80	8	305	305	Models_2_2_4	802.719	0.908954	0.790584	0.0536688	0.0580499	0.132483	0.19282	0.339656	0.509566	0.602987	0.586105	0.341601	0.602987
80	8	306	306	Models_2_2_5	2194.27	0.930177	0.827874	0.0557734	0.0580499	0.17425	0.292825	0.434104	0.666883	0.687937	0.597798	0.365685	0.687937
80	8	307	307	Models_2_2_6	789.642	0.897814	0.770801	0.0536688	0.0536688	0.0920368	0.132483	0.341007	0.508844	0.528525	0.293268	0.0536688	0.528525
80	8	308	308	Models_2_3_4	773.587	0.886658	0.74722	0.0536688	0.0547009	0.135076	0.135552	0.276693	0.376094	0.533058	0.405119	0.0580499	0.533058
80	8	309	309	Models_2_3_5	2232.27	0.921844	0.797554	0.0536688	0.0557734	0.134013	0.200823	0.298742	0.606434	0.707239	0.520127	0.0536688	0.707239
80	8	310	310	Models_2_3_6	846.346	0.846663	0.637381	0.0536688	0.0536688	0.093	0.159355	0.151366	0.358146	0.387491	0.35237	0.0943825	0.387491
80	8	311	311	Models_2_4_5	2281.63	0.923494	0.818278	0.0547009	0.0568889	0.132115	0.257624	0.421752	0.662212	0.727963	0.639153	0.203292	0.727963
80	8	312	312	Models_2_4_6	775.111	0.864078	0.721262	0.0536688	0.0536688	0.0557734	0.0917989	0.261892	0.417436	0.571178	0.447647	0.0632099	0.571178
80	8	313	313	Models_2_5_6	2178.92	0.902362	0.765147	0.0536688	0.0557734	0.0939345	0.200861	0.455883	0.63746	0.751682	0.449592	0.0536688	0.751682
80	8	314	314	Models_2_2	427.224	0.892846	0.766115	0.0536688	0.0536688	0.0547009	0.0907246	0.296266	0.577272	0.367645	0.0536688	0.0536688	0.577272
80	8	315	315	Models_2_3	418.803	0.846745	0.654939	0.0536688	0.0536688	0.0557734	0.103666	0.199568	0.400163	0.485816	0.306405	0.0536688	0.485816
80	8	316	316	Models_2_4	420.74	0.853923	0.723503	0.0536688	0.0536688	0.0568889	0.12477	0.333687	0.372741	0.66834	0.445797	0.137979	0.66834
80	8	317	317	Models_2_5	1836.39	0.902493	0.766701	0.0547009	0.0568889	0.0939875	0.234159	0.322282	0.619014	0.726078	0.524514	0.169058	0.726078
80	8	318	318	Models_2_6	424.465	0.629669	0.308094	0.0536688	0.0536688	0.0536688	0.0536688	0.100573	0.229052	0.144856	0.0536688	0.0536688	0.229052
80	8	319	319	Models_1_2	358.894	0.887482	0.760575	0.0580499	0.202597	0.466488	0.572459	0.607055	0.56131	0.413042	0.205881	0.102716	0.607055
80	8	320	320	Models_1_3	351.712	0.828275	0.62889	0.0568889	0.175058	0.284264	0.435161	0.493399	0.321684	0.186517	0.136192	0.0557734	0.493399
80	8	321	321	Models_1_4	354.172	0.848636	0.71041	0.137139	0.271768	0.645291	0.556296	0.495885	0.363047	0.22497	0.0618357	0.0568889	0.645291
80	8	322	322	Models_1_5	350.52	0.855997	0.699552	0.0693767	0.320034	0.612809	0.704127	0.662835	0.615923	0.291478	0.138512	0.0568889	0.704127
80	8	323	323	Models_1_6	357.629	0.648739	0.32881	0.0536688	0.147237	0.192208	0.257021	0.225641	0.16	0.162585	0.0547009	0.0536688	0.257021
80	8	324	324	Models_1_7	351.185	0.895494	0.756178	0.139518	0.479281	0.704127	0.701705	0.59191	0.368576	0.171193	0.136861	0.0547009	0.704127
80	8	325	325	Models_1_8	352.351	0.885967	0.726351	0.30272	0.699297	0.603881	0.473922	0.348105	0.203348	0.138512	0.0948148	0.0536688	0.699297
80	8	326	326	Models_1_9	358.79	0.900177	0.762428	0.132393	0.528324	0.701658	0.702088	0.591866	0.426928	0.2946	0.165318	0.0975561	0.702088
80	8	327	327	Models_1_10	353.224	0.884549	0.723609	0.0592593	0.299646	0.553925	0.681031	0.677633	0.703064	0.445714	0.320875	0.138272	0.703064
80	9	328	328	Models_3_2_3_4_5_6	2977.53	0.896401	0.719996	0.0222222	0.0241546	0.0292398	0.282222	0.408121	0.482476	0.625829	0.553752	0.268499	0.625829
80	9	329	329	Models_3_2_3_4_5	2656.99	0.888744	0.700902	0.0222222	0.0236407	0.070202	0.284349	0.433951	0.416569	0.625766	0.504501	0.187469	0.625766
80	9	330	330	Models_3_2_3_4_6	1369.36	0.885304	0.700984	0.0222222	0.0591962	0.0762626	0.266519	0.312001	0.518343	0.581019	0.425229	0.189005	0.581019
80	9	331	331	Models_3_2_3_5_6	2656.26	0.886354	0.6979	0.0222222	0.0222222	0.0222222	0.0271003	0.405172	0.530739	0.241551	0.0418803	0.0418803	0.530739
80	9	332	332	Models_3_2_4_5_6	2657.7	0.886614	0.701023	0.0222222	0.0241546	0.0277778	0.193533	0.33348	0.448012	0.651265	0.507674	0.24922	0.651265
80	9	333	333	Models_3_3_4_5_6	2660.48	0.889695	0.70895	0.0222222	0.0236407	0.071664	0.260536	0.359685	0.466831	0.651265	0.543762	0.251836	0.651265
80	9	334	334	Models_3_2_3_4	1030.1	0.880983	0.685556	0.0222222	0.0231481	0.118041	0.236567	0.327118	0.496631	0.553292	0.453836	0.197778	0.553292
80	9	335	335	Models_3_2_3_5	2327.77	0.879598	0.687082	0.0222222	0.0236407	0.0695245	0.288661	0.407049	0.50103	0.530739	0.509747	0.21965	0.530739
80	9	336	336	Models_3_2_3_6	1037.22	0.864035	0.662166	0.0222222	0.0591962	0.146392	0.24097	0.19963	0.41678	0.564032	0.342759	0.224815	0.564032
80	9	337	337	Models_3_2_4_5	2328.73	0.885442	0.692726	0.0222222	0.0231481	0.02849	0.169176	0.316799	0.537423	0.673578	0.432941	0.162098	0.673578
80	9	338	338	Models_3_2_4_6	1042.17	0.880612	0.691435	0.0222222	0.0222222	0.0531217	0.152473	0.418504	0.60129	0.557	0.374208	0.124627	0.60129
80	9	339	339	Models_3_2_5_6	2327.37	0.869773	0.66874	0.0222222	0.0231481	0.0292398	0.264962	0.388485	0.474269	0.599862	0.466468	0.235482	0.599862
80	9	340	340	Models_3_3_4_5	2325.23	0.885818	0.695985	0.0222222	0.0236407	0.108937	0.242146	0.384562	0.393492	0.603091	0.553	0.219112	0.603091
80	9	341	341	Models_3_3_4_6	1032.8	0.877917	0.689868	0.0222222	0.0637014	0.0762626	0.173024	0.334209	0.395556	0.50933	0.428838	0.283785	0.50933
80	9	342	342	Models_3_3_5_6	2336.12	0.875074	0.67528	0.0222222	0.0236407	0.0695245	0.205487	0.336094	0.468254	0.557547	0.542655	0.149048	0.557547
80	9	343	343	Models_3_4_5_6	2324.72	0.867349	0.654673	0.0222222	0.0222222	0.0277778	0.224577	0.316577	0.326936	0.577699	0.366493	0.0453704	0.577699
80	9	344	344	Models_3_2_3	724.078	0.859744	0.654388	0.0222222	0.0655724	0.146392	0.245835	0.277172	0.506255	0.588889	0.334709	0.153199	0.588889
80	9	345	345	Models_3_2_4	726.862	0.87968	0.690909	0.0222222	0.0222222	0.0524971	0.151715	0.442754	0.550217	0.557	0.434446	0.253391	0.557
80	9	346	346	Models_3_2_5	2003.24	0.87189	0.672394	0.0222222	0.0222222	0.0271003	0.108337	0.372006	0.568242	0.512458	0.355833	0.0418803	0.568242
80	9	347	347	Models_3_2_6	731.372	0.843393	0.632068	0.0222222	0.0226757	0.0797884	0.12936	0.278315	0.588889	0.540555	0.347407	0.254347	0.588889
80	9	348	348	Models_3_3_4	727.334	0.872301	0.673016	0.0222222	0.0222222	0.0778939	0.238075	0.323148	0.53003	0.505051	0.428337	0.172748	0.53003
80	9	349	349	Models_3_3_5	2010.51	0.869139	0.661365	0.0222222	0.0236407	0.0688793	0.265608	0.311111	0.450958	0.553606	0.511448	0.2204	0.553606
80	9	350	350	Models_3_3_6	729.008	0.836192	0.608961	0.0222222	0.0637014	0.114141	0.198413	0.200299	0.354379	0.450844	0.512051	0.147471	0.512051
80	9	351	351	Models_3_4_5	2002.73	0.867783	0.66158	0.0222222	0.0231481	0.0271003	0.252134	0.306368	0.429264	0.615111	0.550427	0.22146	0.615111
80	9	352	352	Models_3_4_6	722.571	0.838032	0.619903	0.0222222	0.0222222	0.0241546	0.152339	0.320943	0.484658	0.456715	0.331491	0.0842925	0.484658
80	9	353	353	Models_3_5_6	2003.1	0.831143	0.561455	0.0222222	0.0222222	0.0520202	0.207102	0.359708	0.322222	0.535778	0.364834	0.0819109	0.535778
80	9	354	354	Models_3_2	383.605	0.832851	0.619386	0.0222222	0.0222222	0.0252525	0.175448	0.314192	0.580631	0.544838	0.350145	0.047343	0.580631
80	9	355	355	Models_3_3	384.654	0.829488	0.580251	0.0222222	0.0226757	0.100449	0.213311	0.184534	0.460384	0.46918	0.261341	0.0418803	0.46918
80	9	356	356	Models_3_4	386.703	0.826151	0.61702	0.0222222	0.0222222	0.0236407	0.112594	0.461393	0.530016	0.470477	0.451237	0.189732	0.530016
80	9	357	357	Models_3_5	1661.58	0.827499	0.549582	0.0222222	0.0222222	0.0520202	0.270413	0.36388	0.338092	0.546359	0.246548	0.083669	0.546359
80	9	358	358	Models_3_6	372.781	0.62308	0.286569	0.0222222	0.0181406	0.0181406	0.0181406	0.180148	0.20512	0.326005	0.0418803	0.0418803	0.326005
80	9	370	370	Models_2_2_3_4_5_6	3054.58	0.899522	0.719044	0.0222222	0.0236407	0.0718898	0.281643	0.339824	0.521882	0.645549	0.558742	0.2204	0.645549
80	9	371	371	Models_2_2_3_4_5	2702.41	0.901877	0.724883	0.0222222	0.0241546	0.134798	0.312455	0.381402	0.453629	0.623704	0.538047	0.21965	0.623704
80	9	372	372	Models_2_2_3_4_6	1398.15	0.881518	0.677291	0.0222222	0.0222222	0.0778939	0.209652	0.34598	0.46355	0.522714	0.454882	0.122075	0.522714
80	9	373	373	Models_2_2_3_5_6	2708.72	0.894846	0.705958	0.0222222	0.0241546	0.0702778	0.3	0.387991	0.542316	0.552979	0.472222	0.221184	0.552979
80	9	374	374	Models_2_2_4_5_6	2731.29	0.891621	0.703414	0.0222222	0.0236407	0.0898226	0.284444	0.362646	0.606634	0.534089	0.47601	0.250761	0.606634
80	9	375	375	Models_2_3_4_5_6	2730.48	0.887096	0.689296	0.0222222	0.0231481	0.0513634	0.271378	0.339192	0.486705	0.571956	0.482175	0.160688	0.571956
80	9	376	376	Models_2_2_3_4	1061.97	0.893578	0.703357	0.0226757	0.0560639	0.141229	0.202326	0.231341	0.471573	0.520249	0.404016	0.27756	0.520249
80	9	377	377	Models_2_2_3_5	2392.22	0.884994	0.680059	0.0222222	0.0226757	0.070775	0.298984	0.412205	0.519544	0.527204	0.457224	0.0828283	0.527204
80	9	378	378	Models_2_2_3_6	1067.57	0.876949	0.672482	0.0222222	0.0226757	0.0819801	0.187348	0.295888	0.419565	0.450446	0.345781	0.150494	0.450446
80	9	379	379	Models_2_2_4_5	2392.1	0.887076	0.683625	0.0222222	0.0226757	0.0712522	0.251374	0.362646	0.609457	0.540593	0.40548	0.159042	0.609457
80	9	380	380	Models_2_2_4_6	1063.99	0.874038	0.675628	0.0222222	0.0226757	0.0900585	0.236207	0.308423	0.453333	0.537643	0.462823	0.151611	0.537643
80	9	381	381	Models_2_2_5_6	2396.34	0.884016	0.68735	0.0222222	0.0226757	0.051377	0.184068	0.482223	0.511056	0.553105	0.449629	0.0483951	0.553105
80	9	382	382	Models_2_3_4_5	2393.51	0.894434	0.714856	0.0222222	0.0231481	0.0516784	0.275351	0.34986	0.394895	0.622672	0.486884	0.0494949	0.622672
80	9	383	383	Models_2_3_4_6	1066.63	0.884083	0.699468	0.0222222	0.0222222	0.0778939	0.135709	0.324917	0.494532	0.495442	0.407228	0.0818913	0.495442
80	9	384	384	Models_2_3_5_6	2401.28	0.873975	0.655411	0.0222222	0.0231481	0.0252525	0.207819	0.311111	0.502469	0.551688	0.431047	0.0435556	0.551688
80	9	385	385	Models_2_4_5_6	2390.5	0.871443	0.664051	0.0222222	0.0226757	0.0271003	0.166092	0.366021	0.521273	0.556726	0.52324	0.0483951	0.556726
80	9	386	386	Models_2_2_3	725.026	0.870194	0.666256	0.0222222	0.0908213	0.0762626	0.205073	0.308539	0.415692	0.497848	0.437609	0.370924	0.497848
80	9	387	387	Models_2_2_4	724.816	0.877373	0.68836	0.0222222	0.0236407	0.139121	0.189308	0.302372	0.455402	0.538059	0.437285	0.217979	0.538059
80	9	388	388	Models_2_2_5	2069.38	0.879308	0.677387	0.0222222	0.0231481	0.0712522	0.16893	0.504641	0.493103	0.533442	0.468981	0.0494949	0.533442
80	9	389	389	Models_2_2_6	734.37	0.856799	0.643107	0.0222222	0.0222222	0.0548822	0.215079	0.193502	0.395902	0.492222	0.35637	0.047343	0.492222
80	9	390	390	Models_2_3_4	726.396	0.873545	0.670322	0.0222222	0.0226757	0.0762626	0.133237	0.352287	0.500494	0.555869	0.353981	0.159221	0.555869
80	9	391	391	Models_2_3_5	2067.89	0.889967	0.692597	0.0222222	0.0241546	0.134363	0.298984	0.357111	0.453147	0.547708	0.557835	0.259048	0.557835
80	9	392	392	Models_2_3_6	730.43	0.849813	0.620536	0.0222222	0.0222222	0.0819801	0.0924027	0.276543	0.333894	0.403569	0.415556	0.0463357	0.415556
80	9	393	393	Models_2_4_5	2042.41	0.86811	0.661738	0.0222222	0.0231481	0.051462	0.239329	0.366813	0.402742	0.556726	0.55963	0.191188	0.55963
80	9	394	394	Models_2_4_6	718.973	0.837417	0.61714	0.0222222	0.0222222	0.0246914	0.223014	0.366261	0.415911	0.524366	0.320487	0.0427015	0.524366
80	9	395	395	Models_2_5_6	2042.47	0.84578	0.579987	0.0222222	0.0222222	0.0531217	0.148127	0.250487	0.366825	0.46913	0.421292	0.148404	0.46913
80	9	396	396	Models_2_2	383.081	0.842125	0.638703	0.0222222	0.0226757	0.127523	0.170963	0.220875	0.459974	0.500292	0.472356	0.223236	0.500292
80	9	397	397	Models_2_3	385.013	0.848868	0.62531	0.0222222	0.0222222	0.0845118	0.0537669	0.268908	0.389755	0.471871	0.462527	0.0494949	0.471871
80	9	398	398	Models_2_4	381.507	0.837709	0.635589	0.0222222	0.0222222	0.0560639	0.206408	0.425777	0.461785	0.475175	0.255688	0.0444444	0.475175
80	9	399	399	Models_2_5	1654.24	0.824201	0.550215	0.0222222	0.0222222	0.0258398	0.167235	0.360981	0.389806	0.607523	0.35822	0.0418803	0.607523
80	9	400	400	Models_2_6	372.579	0.676574	0.326039	0.0222222	0.0181406	0.0181406	0.0904348	0.173879	0.155041	0.311696	0.0418803	0.0418803	0.311696
80	9	401	401	Models_1_2	403.684	0.833936	0.623433	0.0258398	0.174038	0.266986	0.435415	0.580631	0.592608	0.396866	0.350145	0.191388	0.592608
80	9	402	402	Models_1_3	395.017	0.828932	0.591425	0.0990493	0.193827	0.320202	0.506219	0.434163	0.261341	0.244689	0.0518519	0.0435556	0.506219
80	9	403	403	Models_1_4	398.246	0.815475	0.623829	0.352528	0.509037	0.451962	0.429749	0.233003	0.283785	0.189732	0.0828986	0.0453704	0.509037
80	9	404	404	Models_1_5	384.234	0.796296	0.510371	0.476794	0.274524	0.181804	0.0828283	0.083669	0.0842593	0.0833333	0.0418803	0.0418803	0.476794
80	9	405	405	Models_1_6	388.578	0.623808	0.291422	0.0570078	0.134823	0.193608	0.326005	0.185615	0.0841353	0.0418803	0.0418803	0.0418803	0.326005
80	9	406	406	Models_1_7	389.086	0.823696	0.547243	0.0252525	0.336705	0.544856	0.478806	0.345569	0.210662	0.12019	0.0833333	0.0418803	0.544856
80	9	407	407	Models_1_8	398.566	0.789258	0.508604	0.122858	0.399278	0.467019	0.299978	0.249334	0.184815	0.116162	0.0841353	0.0418803	0.467019
80	9	408	408	Models_1_9	401.2	0.739206	0.43308	0.408148	0.208259	0.0846763	0.0827037	0.0841353	0.0418803	0.0418803	0.0418803	0.0418803	0.408148
80	9	409	409	Models_1_10	399.053	0.71908	0.413405	0.114285	0.309447	0.239763	0.15435	0.0846763	0.0822331	0.0427015	0.0418803	0.0418803	0.309447
80	10	410	410	Models_3_2_3_4_5_6	2983.31	0.924405	0.804611	0.0536688	0.0926189	0.132073	0.242534	0.352285	0.469735	0.663684	0.679246	0.378396	0.679246
80	10	411	411	Models_3_2_3_4_5	2751.32	0.924028	0.804764	0.0942919	0.0926189	0.121076	0.241708	0.352285	0.445801	0.688672	0.741123	0.403517	0.741123
80	10	412	412	Models_3_2_3_4_6	1436.82	0.900472	0.758608	0.0536688	0.123457	0.0926189	0.136292	0.24716	0.411523	0.508613	0.586112	0.360972	0.586112
80	10	413	413	Models_3_2_3_5_6	2773.19	0.919973	0.798232	0.0942919	0.0926189	0.13305	0.206818	0.372667	0.444994	0.640494	0.661112	0.378396	0.661112
80	10	414	414	Models_3_2_4_5_6	2806	0.921833	0.801145	0.0536688	0.0907231	0.132915	0.177364	0.267725	0.467112	0.733568	0.62607	0.323692	0.733568
80	10	415	415	Models_3_3_4_5_6	2816.99	0.921955	0.790731	0.0959707	0.091358	0.130723	0.185743	0.299723	0.404116	0.680058	0.774746	0.299355	0.774746
80	10	416	416	Models_3_2_3_4	1119.39	0.899105	0.760301	0.0536688	0.123457	0.0971968	0.105059	0.278413	0.439646	0.501458	0.612105	0.391111	0.612105
80	10	417	417	Models_3_2_3_5	2475.23	0.920706	0.797711	0.0547009	0.0922451	0.121076	0.202998	0.399349	0.444355	0.618316	0.632462	0.34932	0.632462
80	10	418	418	Models_3_2_3_6	1121.56	0.887225	0.741331	0.0536688	0.123457	0.0966312	0.135591	0.210779	0.442213	0.529678	0.514777	0.119506	0.529678
80	10	419	419	Models_3_2_4_5	2466.06	0.920306	0.799134	0.0536688	0.0907246	0.0990991	0.238446	0.350794	0.517672	0.755556	0.625606	0.296084	0.755556
80	10	420	420	Models_3_2_4_6	1126.43	0.891285	0.735151	0.0536688	0.091358	0.133369	0.100448	0.277358	0.437587	0.620871	0.560144	0.36078	0.620871
80	10	421	421	Models_3_2_5_6	2476.93	0.916332	0.790704	0.0536688	0.0907246	0.13312	0.13566	0.289784	0.443671	0.728726	0.604633	0.287701	0.728726
80	10	422	422	Models_3_3_4_5	2469.85	0.922241	0.792879	0.0536688	0.0920368	0.0936631	0.206818	0.373139	0.54158	0.733417	0.61028	0.193333	0.733417
80	10	423	423	Models_3_3_4_6	1119.36	0.8942	0.734809	0.0536688	0.126024	0.131934	0.13479	0.22304	0.341692	0.532738	0.559998	0.315667	0.559998
80	10	424	424	Models_3_3_5_6	2478.53	0.912643	0.763813	0.0536688	0.0909295	0.132343	0.206818	0.318295	0.466981	0.730707	0.636027	0.267064	0.730707
80	10	425	425	Models_3_4_5_6	2476.53	0.913049	0.77502	0.0536688	0.0920368	0.0934508	0.179427	0.26741	0.523714	0.821429	0.654401	0.296016	0.821429
80	10	426	426	Models_3_2_3	798.024	0.885202	0.742003	0.0547009	0.123457	0.0965592	0.0946018	0.246561	0.368448	0.477807	0.602877	0.314068	0.602877
80	10	427	427	Models_3_2_4	794.806	0.87912	0.713379	0.0536688	0.0557734	0.0580499	0.168845	0.341468	0.489204	0.588707	0.384169	0.237392	0.588707
80	10	428	428	Models_3_2_5	2130.27	0.915065	0.789545	0.0536688	0.0922451	0.097076	0.177037	0.315931	0.583492	0.686741	0.582451	0.291594	0.686741
80	10	429	429	Models_3_2_6	803.794	0.867872	0.703755	0.0536688	0.0920368	0.0932462	0.13521	0.154585	0.363277	0.495609	0.522114	0.262508	0.522114
80	10	430	430	Models_3_3_4	800.526	0.89283	0.735415	0.0536688	0.126024	0.127233	0.138114	0.226349	0.452855	0.478226	0.486277	0.112037	0.486277
80	10	431	431	Models_3_3_5	2133.56	0.91215	0.754519	0.0536688	0.091358	0.121811	0.205002	0.42328	0.536593	0.684528	0.642958	0.237654	0.684528
80	10	432	432	Models_3_3_6	802.775	0.860547	0.666144	0.0536688	0.13281	0.132453	0.0677249	0.19554	0.334341	0.50642	0.515242	0.189422	0.515242
80	10	433	433	Models_3_4_5	2133.51	0.912388	0.773155	0.0536688	0.091358	0.136786	0.150899	0.376442	0.617571	0.84428	0.609989	0.298321	0.84428
80	10	434	434	Models_3_4_6	796.174	0.852134	0.648727	0.0536688	0.0547009	0.0932462	0.123001	0.278847	0.508081	0.52818	0.428439	0.244289	0.52818
80	10	435	435	Models_3_5_6	2136.98	0.895984	0.728919	0.0536688	0.093	0.133016	0.213774	0.265269	0.489547	0.684319	0.559335	0.199153	0.684319
80	10	436	436	Models_3_2	433.574	0.856418	0.68322	0.0536688	0.0536688	0.0557734	0.119259	0.26812	0.415657	0.430025	0.0960317	0.0960317	0.430025
80	10	437	437	Models_3_3	448.494	0.857103	0.653101	0.0536688	0.0536688	0.0932462	0.0881481	0.235294	0.303333	0.47925	0.539971	0.190617	0.539971
80	10	438	438	Models_3_4	444.821	0.833458	0.613595	0.0536688	0.0536688	0.0536688	0.0536688	0.548437	0.449387	0.0960317	0.0960317	0.0960317	0.548437
80	10	439	439	Models_3_5	1787.53	0.891678	0.708265	0.0536688	0.0536688	0.134963	0.210821	0.383787	0.514383	0.662443	0.487495	0.188019	0.662443
80	10	440	440	Models_3_6	456.113	0.673213	0.342937	0.0536688	0.0536688	0.0547009	0.0933803	0.156307	0.176249	0.323148	0.0960317	0.0960317	0.323148
80	10	452	452	Models_2_2_3_4_5_6	2976.94	0.933473	0.823569	0.0942919	0.0592593	0.120282	0.210108	0.389823	0.403719	0.557007	0.646382	0.316	0.646382
80	10	453	453	Models_2_2_3_4_5	2649.76	0.92591	0.795793	0.0536688	0.0920368	0.0990991	0.194739	0.389823	0.442411	0.57531	0.640508	0.293493	0.640508
80	10	454	454	Models_2_2_3_4_6	1360.96	0.909323	0.75246	0.0547009	0.128494	0.160359	0.167199	0.244218	0.35025	0.430992	0.618188	0.285185	0.618188
80	10	455	455	Models_2_2_3_5_6	2637.4	0.927734	0.809249	0.0942919	0.0935354	0.119675	0.283361	0.345244	0.403719	0.527681	0.578743	0.418765	0.578743
80	10	456	456	Models_2_2_4_5_6	2658.86	0.92251	0.792765	0.0536688	0.0920368	0.119675	0.201032	0.389823	0.452855	0.619336	0.662899	0.232012	0.662899
80	10	457	457	Models_2_3_4_5_6	2676.35	0.926791	0.807516	0.0536688	0.0942919	0.0935354	0.186706	0.2557	0.471814	0.709017	0.620734	0.116908	0.709017
80	10	458	458	Models_2_2_3_4	1027.82	0.90898	0.760702	0.0536688	0.0547009	0.128494	0.160416	0.243427	0.410847	0.615392	0.347219	0.0960317	0.615392
80	10	459	459	Models_2_2_3_5	2287.22	0.924261	0.794261	0.0536688	0.093	0.0944975	0.188418	0.367448	0.471852	0.558213	0.61028	0.0960317	0.61028
80	10	460	460	Models_2_2_3_6	1029.62	0.898459	0.730622	0.0536688	0.094161	0.12025	0.201186	0.273538	0.342301	0.433673	0.646754	0.18715	0.646754
80	10	461	461	Models_2_2_4_5	2282.58	0.927479	0.813268	0.0942919	0.0935354	0.121321	0.254074	0.367601	0.373116	0.509011	0.614202	0.431437	0.614202
80	10	462	462	Models_2_2_4_6	1032.25	0.900314	0.739743	0.0536688	0.094507	0.119259	0.200944	0.245009	0.436968	0.506074	0.500673	0.281335	0.506074
80	10	463	463	Models_2_2_5_6	2286.03	0.925417	0.808002	0.0959707	0.0618357	0.157086	0.238493	0.343951	0.420716	0.530285	0.572871	0.429154	0.572871
80	10	464	464	Models_2_3_4_5	2263.27	0.927499	0.809571	0.0536688	0.0942919	0.0935354	0.188411	0.292115	0.473449	0.633551	0.640513	0.25773	0.640513
80	10	465	465	Models_2_3_4_6	1005.49	0.894266	0.718104	0.0536688	0.133926	0.124029	0.138114	0.255374	0.329101	0.417554	0.573017	0.256291	0.573017
80	10	466	466	Models_2_3_5_6	2267.63	0.918961	0.779626	0.0959707	0.093	0.0944975	0.143114	0.255556	0.447484	0.609722	0.650965	0.382254	0.650965
80	10	467	467	Models_2_4_5_6	2261.16	0.910362	0.771161	0.0959707	0.093	0.0605201	0.127867	0.379321	0.500951	0.640616	0.6898	0.264663	0.6898
80	10	468	468	Models_2_2_3	684.826	0.900638	0.754863	0.0536688	0.124029	0.0956393	0.166455	0.231958	0.408244	0.433673	0.620178	0.413157	0.620178
80	10	469	469	Models_2_2_4	685.582	0.90386	0.754484	0.0942919	0.126033	0.12025	0.200404	0.255548	0.448768	0.484698	0.55981	0.281335	0.55981
80	10	470	470	Models_2_2_5	1953.09	0.920991	0.798812	0.0959707	0.0909091	0.157444	0.23752	0.316747	0.456103	0.53162	0.616922	0.36816	0.616922
80	10	471	471	Models_2_2_6	685.137	0.887133	0.72866	0.0536688	0.0592593	0.157194	0.188311	0.219492	0.359802	0.488526	0.617636	0.216213	0.617636
80	10	472	472	Models_2_3_4	681.098	0.897099	0.733374	0.0547009	0.135087	0.124029	0.167895	0.224811	0.241516	0.4483	0.574806	0.313889	0.574806
80	10	473	473	Models_2_3_5	1956.18	0.915626	0.762851	0.0536688	0.0942919	0.0920988	0.106119	0.332593	0.537096	0.643539	0.550868	0.0960317	0.643539
80	10	474	474	Models_2_3_6	685.179	0.869356	0.670599	0.0536688	0.0959707	0.094507	0.163492	0.214649	0.259508	0.448926	0.540981	0.0960317	0.540981
80	10	475	475	Models_2_4_5	1949.65	0.911188	0.774502	0.0959707	0.0920368	0.0605201	0.126042	0.319844	0.500951	0.584567	0.734046	0.26973	0.734046
80	10	476	476	Models_2_4_6	683.954	0.849101	0.641226	0.0536688	0.0959707	0.094507	0.200488	0.180397	0.437241	0.558961	0.440401	0.197287	0.558961
80	10	477	477	Models_2_5_6	1956.4	0.884547	0.702489	0.0536688	0.0536688	0.0536688	0.0536688	0.309806	0.269128	0.0960317	0.0960317	0.0960317	0.309806
80	10	478	478	Models_2_2	368.303	0.882264	0.728365	0.0536688	0.0920368	0.119618	0.133496	0.24408	0.402874	0.443529	0.519727	0.141849	0.519727
80	10	479	479	Models_2_3	368.705	0.875394	0.697198	0.0536688	0.0942919	0.094507	0.163165	0.159088	0.231115	0.436871	0.610922	0.116908	0.610922
80	10	480	480	Models_2_4	371.088	0.840086	0.633018	0.0536688	0.0536688	0.16122	0.157194	0.226787	0.453978	0.530147	0.377578	0.172856	0.530147
80	10	481	481	Models_2_5	1638.82	0.887305	0.711747	0.0536688	0.0536688	0.0536688	0.0924125	0.32381	0.662941	0.212632	0.0960317	0.0960317	0.662941
80	10	482	482	Models_2_6	373.226	0.684169	0.343777	0.0536688	0.0536688	0.0959707	0.0981587	0.1272	0.283627	0.21319	0.0960317	0.0960317	0.283627
80	10	483	483	Models_1_2	371.236	0.856503	0.689912	0.220673	0.415657	0.554352	0.468032	0.453084	0.317197	0.210982	0.105447	0.0977778	0.554352
80	10	484	484	Models_1_3	366.258	0.857261	0.658999	0.0979469	0.290072	0.360403	0.574714	0.519678	0.274533	0.21552	0.153927	0.105447	0.574714
80	10	485	485	Models_1_4	369.161	0.836741	0.626314	0.128678	0.528737	0.545733	0.449387	0.350696	0.21219	0.244198	0.169815	0.0995885	0.545733
80	10	486	486	Models_1_5	361.886	0.855734	0.629461	0.194314	0.528236	0.652211	0.382612	0.221296	0.140974	0.0977778	0.0960317	0.0960317	0.652211
80	10	487	487	Models_1_6	374.247	0.672234	0.346502	0.0956567	0.250701	0.232757	0.323148	0.158222	0.0960317	0.0960317	0.0960317	0.0960317	0.323148
80	10	488	488	Models_1_7	358.647	0.88283	0.687474	0.213774	0.434519	0.663012	0.682017	0.566183	0.271666	0.164571	0.103419	0.0960317	0.682017
80	10	489	489	Models_1_8	357.637	0.892311	0.720883	0.140388	0.3592	0.514383	0.662261	0.726807	0.612227	0.413266	0.209003	0.107556	0.726807
80	10	490	490	Models_1_9	366.479	0.866855	0.659084	0.308073	0.570891	0.56732	0.551982	0.323692	0.23314	0.161728	0.103419	0.0960317	0.570891
80	10	491	491	Models_1_10	365.798	0.864168	0.653076	0.269069	0.496319	0.548094	0.524256	0.460722	0.263917	0.161728	0.103419	0.0960317	0.548094
10	8	492	492	Models_3_2_3_4_5_6	20570.9	0.895502	0.595206	0.0536688	0.0536688	0.0536688	0.0547009	0.0547009	0.0568889	0.20941	0.452974	0.479517	0.479517
10	8	493	493	Models_3_2_3_4_5	17877.8	0.898161	0.605343	0.0536688	0.0536688	0.0536688	0.0547009	0.0547009	0.0568889	0.20941	0.446085	0.519192	0.519192
10	8	494	494	Models_3_2_3_4_6	9597.97	0.818881	0.420457	0.0536688	0.0536688	0.0536688	0.0536688	0.0536688	0.0557734	0.170092	0.260019	0.380233	0.380233
10	8	495	495	Models_3_2_3_5_6	17963.5	0.889238	0.57935	0.0536688	0.0536688	0.0536688	0.0547009	0.0547009	0.0605201	0.207587	0.42007	0.465021	0.465021
10	8	496	496	Models_3_2_4_5_6	16579.5	0.890722	0.596631	0.0536688	0.0536688	0.0536688	0.0547009	0.0547009	0.100026	0.199506	0.441771	0.422227	0.441771
10	8	497	497	Models_3_3_4_5_6	16326.9	0.879907	0.559341	0.0536688	0.0536688	0.0536688	0.0536688	0.0557734	0.0618357	0.29496	0.509446	0.471294	0.509446
10	8	498	498	Models_3_2_3_4	6658.32	0.808866	0.417392	0.0536688	0.0536688	0.0536688	0.0536688	0.0536688	0.098719	0.103577	0.328063	0.230398	0.328063
10	8	499	499	Models_3_2_3_5	14668.4	0.889395	0.582669	0.0536688	0.0536688	0.0536688	0.0547009	0.0547009	0.0580499	0.212205	0.401067	0.522717	0.522717
10	8	500	500	Models_3_2_3_6	6458.13	0.795693	0.373119	0.0536688	0.0536688	0.0536688	0.0536688	0.0536688	0.0557734	0.170092	0.335761	0.0568889	0.335761
10	8	501	501	Models_3_2_4_5	14073.8	0.894489	0.606774	0.0536688	0.0536688	0.0536688	0.0547009	0.0547009	0.0592593	0.199506	0.452974	0.531939	0.531939
10	8	502	502	Models_3_2_4_6	5843.74	0.807698	0.408141	0.0536688	0.0536688	0.0536688	0.0536688	0.0536688	0.0568889	0.16991	0.316498	0.317576	0.317576
10	8	503	503	Models_3_2_5_6	13661	0.884515	0.578087	0.0536688	0.0536688	0.0536688	0.0547009	0.0547009	0.0605201	0.205853	0.4349	0.602556	0.602556
10	8	504	504	Models_3_3_4_5	13506.1	0.889547	0.573803	0.0536688	0.0536688	0.0536688	0.0547009	0.0547009	0.0592593	0.178342	0.431293	0.477752	0.477752
10	8	505	505	Models_3_3_4_6	5870.6	0.766887	0.329337	0.0536688	0.0536688	0.0536688	0.0536688	0.0536688	0.174383	0.280456	0.0928395	0.0536688	0.280456
10	8	506	506	Models_3_3_5_6	13820.5	0.866968	0.525129	0.0536688	0.0536688	0.0536688	0.0536688	0.0568889	0.0618357	0.292365	0.47395	0.404697	0.47395
10	8	507	507	Models_3_4_5_6	14489.6	0.870613	0.552587	0.0536688	0.0536688	0.0536688	0.0536688	0.0557734	0.100026	0.237629	0.535104	0.341612	0.535104
10	8	508	508	Models_3_2_3	4594.2	0.782427	0.359262	0.0536688	0.0536688	0.0536688	0.0536688	0.0536688	0.0568889	0.142222	0.360508	0.0557734	0.360508
10	8	509	509	Models_3_2_4	4539.99	0.79655	0.402234	0.0536688	0.0536688	0.0536688	0.0536688	0.0536688	0.09988	0.132371	0.343911	0.236841	0.343911
10	8	510	510	Models_3_2_5	12529	0.882393	0.575704	0.0536688	0.0536688	0.0536688	0.0547009	0.0547009	0.100026	0.241015	0.508025	0.41937	0.508025
10	8	511	511	Models_3_2_6	4625.7	0.776327	0.332663	0.0536688	0.0536688	0.0536688	0.0536688	0.0536688	0.098719	0.166122	0.284382	0.134217	0.284382
10	8	512	512	Models_3_3_4	4569.78	0.758704	0.330687	0.0536688	0.0536688	0.0536688	0.0536688	0.0547009	0.174383	0.0946177	0.4643	0.0536688	0.4643
10	8	513	513	Models_3_3_5	12546.2	0.871041	0.52994	0.0536688	0.0536688	0.0536688	0.0536688	0.0557734	0.0618357	0.32413	0.544134	0.267901	0.544134
10	8	514	514	Models_3_3_6	4607.37	0.712129	0.2348	0.0536688	0.0536688	0.0536688	0.0536688	0.0536688	0.0965309	0.186121	0.160507	0.0536688	0.186121
10	8	515	515	Models_3_4_5	12561.9	0.873568	0.560477	0.0536688	0.0536688	0.0536688	0.0536688	0.0557734	0.100026	0.290342	0.554387	0.357895	0.554387
10	8	516	516	Models_3_4_6	4496.27	0.705641	0.287819	0.0536688	0.0536688	0.0536688	0.0536688	0.0536688	0.126706	0.150625	0.491237	0.0536688	0.491237
10	8	517	517	Models_3_5_6	12143.9	0.84972	0.499574	0.0536688	0.0536688	0.0536688	0.0536688	0.0557734	0.0618357	0.269674	0.553863	0.356938	0.553863
10	8	518	518	Models_3_2	2265.64	0.761214	0.312129	0.0536688	0.0536688	0.0536688	0.0536688	0.0536688	0.0568889	0.128636	0.387989	0.0557734	0.387989
10	8	519	519	Models_3_3	2331.73	0.702968	0.227738	0.0536688	0.0536688	0.0536688	0.0536688	0.0547009	0.0965309	0.371111	0.0536688	0.0536688	0.371111
10	8	520	520	Models_3_4	2255.37	0.696472	0.290496	0.0536688	0.0536688	0.0536688	0.0536688	0.0976035	0.124066	0.309448	0.489103	0.0536688	0.489103
10	8	521	521	Models_3_5	11577.9	0.851272	0.496265	0.0536688	0.0536688	0.0536688	0.0536688	0.0547009	0.0632099	0.32346	0.554519	0.324185	0.554519
10	8	522	522	Models_3_6	2838.6	0.54257	0.137191	0.0536688	0.0536688	0.0536688	0.0536688	0.0536688	0.106841	0.0536688	0.0536688	0.0536688	0.106841
10	8	534	534	Models_2_2_3_4_5_6	19377.3	0.908932	0.645641	0.0536688	0.0536688	0.0536688	0.0547009	0.0547009	0.0557734	0.142222	0.426052	0.521912	0.521912
10	8	535	535	Models_2_2_3_4_5	19309.3	0.908805	0.643885	0.0536688	0.0536688	0.0536688	0.0547009	0.0547009	0.0568889	0.142222	0.395643	0.506964	0.506964
10	8	536	536	Models_2_2_3_4_6	10327.6	0.837883	0.468376	0.0536688	0.0536688	0.0536688	0.0536688	0.0536688	0.0547009	0.190819	0.293716	0.0580499	0.293716
10	8	537	537	Models_2_2_3_5_6	19361.9	0.902172	0.614481	0.0536688	0.0536688	0.0547009	0.0547009	0.0547009	0.0557734	0.104153	0.435968	0.572032	0.572032
10	8	538	538	Models_2_2_4_5_6	19365.2	0.901715	0.630254	0.0536688	0.0536688	0.0536688	0.0547009	0.0547009	0.0963951	0.142745	0.516571	0.349438	0.516571
10	8	539	539	Models_2_3_4_5_6	18686.4	0.899817	0.620218	0.0536688	0.0536688	0.0536688	0.0536688	0.0547009	0.0580499	0.141093	0.475005	0.550446	0.550446
10	8	540	540	Models_2_2_3_4	7184.81	0.833577	0.467229	0.0536688	0.0536688	0.0536688	0.0536688	0.0536688	0.0547009	0.163535	0.279259	0.23785	0.279259
10	8	541	541	Models_2_2_3_5	16500.9	0.897634	0.604666	0.0536688	0.0536688	0.0547009	0.0547009	0.0547009	0.0568889	0.145162	0.444021	0.455204	0.455204
10	8	542	542	Models_2_2_3_6	7156.73	0.806358	0.391646	0.0536688	0.0536688	0.0536688	0.0536688	0.0536688	0.0547009	0.166271	0.33729	0.0536688	0.33729
10	8	543	543	Models_2_2_4_5	16479.8	0.903569	0.639344	0.0536688	0.0536688	0.0536688	0.0547009	0.0547009	0.0568889	0.144438	0.467924	0.481659	0.481659
10	8	544	544	Models_2_2_4_6	7049.21	0.835441	0.46746	0.0536688	0.0536688	0.0536688	0.0536688	0.0536688	0.0557734	0.195514	0.261363	0.133183	0.261363
10	8	545	545	Models_2_2_5_6	14107.2	0.897495	0.609145	0.0536688	0.0536688	0.0536688	0.0547009	0.0547009	0.0557734	0.104153	0.39291	0.490377	0.490377
10	8	546	546	Models_2_3_4_5	14204.2	0.897768	0.615896	0.0536688	0.0536688	0.0536688	0.0536688	0.0547009	0.0975561	0.139708	0.493908	0.600856	0.600856
10	8	547	547	Models_2_3_4_6	6224.52	0.822343	0.417054	0.0536688	0.0536688	0.0536688	0.0536688	0.0536688	0.0959707	0.169745	0.342429	0.0547009	0.342429
10	8	548	548	Models_2_3_5_6	14177.1	0.886754	0.578853	0.0536688	0.0536688	0.0536688	0.0547009	0.0557734	0.140595	0.238719	0.559259	0.287472	0.559259
10	8	549	549	Models_2_4_5_6	14111	0.891581	0.611695	0.0536688	0.0536688	0.0536688	0.0536688	0.0547009	0.0592593	0.206561	0.416508	0.487993	0.487993
10	8	550	550	Models_2_2_3	5363.4	0.803307	0.395615	0.0536688	0.0536688	0.0536688	0.0536688	0.0536688	0.0942919	0.135374	0.299091	0.125046	0.299091
10	8	551	551	Models_2_2_4	5431.49	0.823088	0.447638	0.0536688	0.0536688	0.0536688	0.0536688	0.0536688	0.0547009	0.163434	0.243358	0.0547009	0.243358
10	8	552	552	Models_2_2_5	14765.5	0.897936	0.612832	0.0536688	0.0536688	0.0547009	0.0547009	0.0547009	0.0568889	0.145162	0.476825	0.51681	0.51681
10	8	553	553	Models_2_2_6	5196.15	0.793386	0.364457	0.0536688	0.0536688	0.0536688	0.0536688	0.0536688	0.0557734	0.1873	0.259369	0.0536688	0.259369
10	8	554	554	Models_2_3_4	5191.08	0.811445	0.411581	0.0536688	0.0536688	0.0536688	0.0536688	0.0536688	0.0547009	0.16936	0.333066	0.0943825	0.333066
10	8	555	555	Models_2_3_5	14635.2	0.886316	0.576834	0.0536688	0.0536688	0.0536688	0.0547009	0.0557734	0.0975561	0.14448	0.48455	0.29645	0.48455
10	8	556	556	Models_2_3_6	5202.75	0.756206	0.291605	0.0536688	0.0536688	0.0536688	0.0536688	0.0536688	0.0568889	0.2053	0.223947	0.0536688	0.223947
10	8	557	557	Models_2_4_5	13008	0.891545	0.617434	0.0536688	0.0536688	0.0536688	0.0536688	0.0547009	0.0580499	0.177778	0.491486	0.402575	0.491486
10	8	558	558	Models_2_4_6	4106.7	0.788242	0.361469	0.0536688	0.0536688	0.0536688	0.0536688	0.0547009	0.0592593	0.232322	0.236066	0.0536688	0.236066
10	8	559	559	Models_2_5_6	11697.4	0.866613	0.541245	0.0536688	0.0536688	0.0536688	0.0536688	0.0557734	0.0973913	0.287414	0.579012	0.372164	0.579012
10	8	560	560	Models_2_2	2647.98	0.78616	0.372917	0.0536688	0.0536688	0.0536688	0.0536688	0.0959707	0.0557734	0.118304	0.329927	0.0948148	0.329927
10	8	561	561	Models_2_3	2747.06	0.752083	0.296616	0.0536688	0.0536688	0.0536688	0.0536688	0.0536688	0.0557734	0.102716	0.3176	0.0536688	0.3176
10	8	562	562	Models_2_4	2760.34	0.747026	0.34872	0.0536688	0.0536688	0.0536688	0.0536688	0.0965309	0.0565657	0.26889	0.197377	0.0536688	0.26889
10	8	563	563	Models_2_5	11588.4	0.867531	0.546886	0.0536688	0.0536688	0.0536688	0.0536688	0.0547009	0.0618357	0.240742	0.479349	0.385887	0.479349
10	8	564	564	Models_2_6	2735.71	0.552019	0.135919	0.0536688	0.0536688	0.0536688	0.0536688	0.091358	0.0536688	0.0536688	0.0536688	0.0536688	0.091358
10	8	565	565	Models_1_2	2118.56	0.761477	0.318137	0.13669	0.266825	0.487846	0.210684	0.0557734	0.0536688	0.0536688	0.0536688	0.0536688	0.487846
10	8	566	566	Models_1_3	2139.25	0.702978	0.228099	0.0547009	0.134449	0.160586	0.488092	0.0792381	0.0478632	0.0536688	0.0536688	0.0536688	0.488092
10	8	567	567	Models_1_4	2162.88	0.703708	0.298471	0.0976035	0.0976035	0.127809	0.124938	0.353468	0.580747	0.170574	0.0580499	0.0536688	0.580747
10	8	568	568	Models_1_5	2149.18	0.647517	0.235529	0.0536688	0.662429	0.0536688	0.0536688	0.0536688	0.0536688	0.0536688	0.0536688	0.0536688	0.662429
10	8	569	569	Models_1_6	2168.05	0.542903	0.140556	0.0916078	0.199402	0.0536688	0.0536688	0.0536688	0.0536688	0.0536688	0.0536688	0.0536688	0.199402
10	8	570	570	Models_1_7	2127.1	0.731821	0.320187	0.0536688	0.0536688	0.61642	0.582931	0.17552	0.101342	0.0536688	0.0536688	0.0536688	0.61642
10	8	571	571	Models_1_8	2194.84	0.764279	0.36702	0.0536688	0.0580499	0.484836	0.645731	0.609008	0.547373	0.265218	0.138149	0.0547009	0.645731
10	8	572	572	Models_1_9	2155.23	0.77979	0.390115	0.0536688	0.29304	0.523759	0.609331	0.504974	0.424125	0.225024	0.100026	0.0536688	0.609331
10	8	573	573	Models_1_10	2192.11	0.78501	0.377448	0.0557734	0.477739	0.496194	0.374825	0.373933	0.203048	0.0941278	0.0547009	0.0536688	0.496194
10	9	574	574	Models_3_2_3_4_5_6	20914	0.859759	0.456585	0.0222222	0.0222222	0.0222222	0.0222222	0.0655724	0.106999	0.136383	0.361052	0.448504	0.448504
10	9	575	575	Models_3_2_3_4_5	18217	0.858025	0.450675	0.0222222	0.0222222	0.0222222	0.0226757	0.0655724	0.10826	0.257885	0.299327	0.472531	0.472531
10	9	576	576	Models_3_2_3_4_6	9020.78	0.804977	0.354417	0.0222222	0.0222222	0.0222222	0.0222222	0.0651	0.0665788	0.248975	0.388485	0.211085	0.388485
10	9	577	577	Models_3_2_3_5_6	15942.2	0.846812	0.4263	0.0222222	0.0222222	0.0222222	0.0226757	0.0651	0.0652711	0.106413	0.422698	0.358992	0.422698
10	9	578	578	Models_3_2_4_5_6	16591.4	0.838524	0.423364	0.0222222	0.0222222	0.0222222	0.0222222	0.0226757	0.0664195	0.254321	0.430752	0.349877	0.430752
10	9	579	579	Models_3_3_4_5_6	16481.5	0.85635	0.447313	0.0222222	0.0222222	0.0222222	0.0226757	0.0660649	0.142506	0.104697	0.288957	0.433408	0.433408
10	9	580	580	Models_3_2_3_4	6714.3	0.802248	0.364049	0.0222222	0.0222222	0.0222222	0.0222222	0.0226757	0.0236407	0.188167	0.344455	0.182998	0.344455
10	9	581	581	Models_3_2_3_5	14183.8	0.845274	0.418696	0.0222222	0.0222222	0.0222222	0.0226757	0.0651	0.0658322	0.171483	0.298814	0.369363	0.369363
10	9	582	582	Models_3_2_3_6	6309.14	0.772596	0.273321	0.0222222	0.0222222	0.0222222	0.0222222	0.0222222	0.0236407	0.18548	0.254214	0.0418803	0.254214
10	9	583	583	Models_3_2_4_5	13877.7	0.834395	0.417383	0.0222222	0.0222222	0.0222222	0.0222222	0.0236407	0.0658322	0.315406	0.373114	0.389179	0.389179
10	9	584	584	Models_3_2_4_6	6098.25	0.755015	0.319241	0.0222222	0.0222222	0.0222222	0.0222222	0.0226757	0.0241546	0.301171	0.396524	0.160346	0.396524
10	9	585	585	Models_3_2_5_6	13798.7	0.809698	0.358733	0.0222222	0.0222222	0.0222222	0.0222222	0.0226757	0.0688793	0.260067	0.433188	0.270904	0.433188
10	9	586	586	Models_3_3_4_5	13807.2	0.855876	0.448774	0.0222222	0.0222222	0.0222222	0.0226757	0.0655724	0.13784	0.173975	0.310513	0.396747	0.396747
10	9	587	587	Models_3_3_4_6	6117.94	0.79801	0.341904	0.0222222	0.0222222	0.0222222	0.0222222	0.0651	0.0660649	0.154521	0.287798	0.213329	0.287798
10	9	588	588	Models_3_3_5_6	13930.5	0.843219	0.419928	0.0222222	0.0222222	0.0222222	0.0226757	0.0655724	0.105851	0.170018	0.342874	0.383822	0.383822
10	9	589	589	Models_3_4_5_6	14376.5	0.832232	0.414833	0.0222222	0.0222222	0.0222222	0.0222222	0.0222222	0.0647343	0.256876	0.372608	0.410072	0.410072
10	9	590	590	Models_3_2_3	5000.39	0.772202	0.274331	0.0222222	0.0222222	0.0222222	0.0222222	0.0222222	0.0241546	0.157409	0.23636	0.0418803	0.23636
10	9	591	591	Models_3_2_4	4862.5	0.754031	0.321081	0.0222222	0.0222222	0.0222222	0.0222222	0.0226757	0.336579	0.0418803	0.0418803	0.0418803	0.336579
10	9	592	592	Models_3_2_5	13013.3	0.808282	0.36005	0.0222222	0.0222222	0.0222222	0.0222222	0.0226757	0.0664195	0.286041	0.430329	0.270877	0.430329
10	9	593	593	Models_3_2_6	4847.88	0.672711	0.16438	0.0222222	0.0222222	0.0222222	0.0222222	0.0236407	0.131386	0.32085	0.120037	0.0418803	0.32085
10	9	594	594	Models_3_3_4	5050.46	0.797097	0.349524	0.0222222	0.0222222	0.0222222	0.0222222	0.0226757	0.0241546	0.169143	0.327155	0.161364	0.327155
10	9	595	595	Models_3_3_5	13554.6	0.841895	0.413482	0.0222222	0.0222222	0.0222222	0.0226757	0.0655724	0.141358	0.13545	0.281886	0.289144	0.289144
10	9	596	596	Models_3_3_6	5021.85	0.753581	0.243477	0.0222222	0.0222222	0.0222222	0.0222222	0.0231481	0.0236407	0.166764	0.147762	0.0418803	0.166764
10	9	597	597	Models_3_4_5	13558.9	0.828801	0.408648	0.0222222	0.0222222	0.0222222	0.0222222	0.0222222	0.0241546	0.342189	0.381818	0.443863	0.443863
10	9	598	598	Models_3_4_6	5133.01	0.728206	0.291745	0.0222222	0.0222222	0.0222222	0.0222222	0.0226757	0.167994	0.157447	0.366667	0.0418803	0.366667
10	9	599	599	Models_3_5_6	13385.3	0.795459	0.339735	0.0222222	0.0222222	0.0222222	0.0222222	0.0222222	0.0665788	0.315017	0.380263	0.226211	0.380263
10	9	600	600	Models_3_2	2691.17	0.68265	0.18036	0.0222222	0.0222222	0.0222222	0.0222222	0.0226757	0.134455	0.382623	0.0418803	0.0418803	0.382623
10	9	601	601	Models_3_3	2665.82	0.757512	0.23692	0.0222222	0.0222222	0.0222222	0.0222222	0.0655724	0.0941745	0.0418803	0.0418803	0.0418803	0.0941745
10	9	602	602	Models_3_4	2849.23	0.723838	0.292153	0.0222222	0.0222222	0.0222222	0.0226757	0.0765432	0.161142	0.259796	0.302398	0.0418803	0.302398
10	9	603	603	Models_3_5	11432.9	0.78998	0.329416	0.0222222	0.0222222	0.0222222	0.0222222	0.0222222	0.070202	0.334208	0.352877	0.240231	0.352877
10	9	604	604	Models_3_6	2843.11	0.523606	0.107048	0.0222222	0.0222222	0.0222222	0.0181406	0.0138889	0.208096	0.0418803	0.0418803	0.0418803	0.208096
10	9	616	616	Models_2_2_3_4_5_6	20228.8	0.878768	0.504724	0.0222222	0.0222222	0.0222222	0.0222222	0.0222222	0.0236407	0.103906	0.401852	0.522071	0.522071
10	9	617	617	Models_2_2_3_4_5	18895.4	0.877262	0.50064	0.0222222	0.0222222	0.0222222	0.0222222	0.0222222	0.0241546	0.103906	0.425998	0.557884	0.557884
10	9	618	618	Models_2_2_3_4_6	9749.68	0.832728	0.424246	0.0222222	0.0222222	0.0222222	0.0222222	0.0222222	0.0231481	0.13547	0.366667	0.195556	0.366667
10	9	619	619	Models_2_2_3_5_6	19396.9	0.861551	0.458616	0.0222222	0.0222222	0.0222222	0.0222222	0.0222222	0.0236407	0.109524	0.400703	0.373506	0.400703
10	9	620	620	Models_2_2_4_5_6	21812.1	0.86439	0.480639	0.0222222	0.0222222	0.0222222	0.0222222	0.0222222	0.0652711	0.306534	0.484423	0.33631	0.484423
10	9	621	621	Models_2_3_4_5_6	21582.2	0.871462	0.485205	0.0222222	0.0222222	0.0222222	0.0222222	0.0222222	0.0236407	0.103906	0.303595	0.482306	0.482306
10	9	622	622	Models_2_2_3_4	6763.11	0.830382	0.429837	0.0222222	0.0222222	0.0222222	0.0222222	0.0222222	0.0231481	0.13547	0.405895	0.182507	0.405895
10	9	623	623	Models_2_2_3_5	15510.2	0.864819	0.470165	0.0222222	0.0222222	0.0222222	0.0222222	0.0222222	0.0236407	0.181753	0.344666	0.368889	0.368889
10	9	624	624	Models_2_2_3_6	7053.15	0.787471	0.332573	0.0222222	0.0222222	0.0222222	0.0222222	0.0222222	0.0185185	0.167529	0.282568	0.0854321	0.282568
10	9	625	625	Models_2_2_4_5	16262.3	0.859414	0.46871	0.0222222	0.0222222	0.0222222	0.0222222	0.0222222	0.0246914	0.195216	0.417354	0.481856	0.481856
10	9	626	626	Models_2_2_4_6	7332.12	0.810719	0.389946	0.0222222	0.0222222	0.0222222	0.0222222	0.0222222	0.0236407	0.204112	0.346462	0.0805926	0.346462
10	9	627	627	Models_2_2_5_6	16019.4	0.846806	0.442612	0.0222222	0.0222222	0.0222222	0.0222222	0.0222222	0.0665788	0.264622	0.400317	0.416543	0.416543
10	9	628	628	Models_2_3_4_5	15535.2	0.869973	0.478968	0.0222222	0.0222222	0.0222222	0.0222222	0.0222222	0.0246914	0.137722	0.37699	0.475707	0.475707
10	9	629	629	Models_2_3_4_6	6573.03	0.818348	0.389602	0.0222222	0.0222222	0.0222222	0.0222222	0.0222222	0.0231481	0.134793	0.386291	0.08438	0.386291
10	9	630	630	Models_2_3_5_6	15030.2	0.851782	0.435434	0.0222222	0.0222222	0.0222222	0.0222222	0.0222222	0.0241546	0.16356	0.370505	0.33697	0.370505
10	9	631	631	Models_2_4_5_6	15016.9	0.846464	0.441706	0.0222222	0.0222222	0.0222222	0.0222222	0.0222222	0.0591962	0.0697531	0.450861	0.410036	0.450861
10	9	632	0	Models_2_2_3	4821.34	0.797477	0.355521	0.0222222	0.0222222	0.0222222	0.0222222	0.0222222	0.0226757	0.206643	0.429997	0.0805926	0.429997
10	9	633	1	Models_2_2_4	4842.4	0.810975	0.400803	0.0222222	0.0222222	0.0222222	0.0222222	0.0222222	0.0236407	0.236095	0.39249	0.0444444	0.39249
10	9	634	2	Models_2_2_5	13586.2	0.843805	0.435818	0.0222222	0.0222222	0.0222222	0.0222222	0.0222222	0.0236407	0.109524	0.415633	0.453241	0.453241
10	9	635	3	Models_2_2_6	4914.58	0.742571	0.252531	0.0222222	0.0222222	0.0222222	0.0222222	0.0222222	0.0530864	0.15873	0.243225	0.0418803	0.243225
10	9	636	4	Models_2_3_4	5037.97	0.822256	0.405264	0.0222222	0.0222222	0.0222222	0.0222222	0.0222222	0.0231481	0.1391	0.321177	0.123239	0.321177
10	9	637	5	Models_2_3_5	13993.5	0.855022	0.444343	0.0222222	0.0222222	0.0222222	0.0222222	0.0222222	0.0241546	0.137722	0.354976	0.495861	0.495861
10	9	638	6	Models_2_3_6	5062.67	0.75373	0.268512	0.0222222	0.0222222	0.0222222	0.0222222	0.0222222	0.0181406	0.122222	0.364873	0.0418803	0.364873
10	9	639	7	Models_2_4_5	13951.1	0.849468	0.450486	0.0222222	0.0222222	0.0222222	0.0222222	0.0222222	0.0231481	0.130094	0.400703	0.388111	0.400703
10	9	640	8	Models_2_4_6	5049.41	0.761359	0.307213	0.0222222	0.0222222	0.0222222	0.0222222	0.0222222	0.0252525	0.299683	0.0453704	0.0418803	0.299683
10	9	641	9	Models_2_5_6	13596.1	0.801713	0.360044	0.0222222	0.0222222	0.0222222	0.0222222	0.0222222	0.0548822	0.260302	0.43129	0.398864	0.43129
10	9	642	10	Models_2_2	2652.86	0.742872	0.277882	0.0222222	0.0222222	0.0222222	0.0222222	0.0222222	0.0236407	0.132943	0.512041	0.0418803	0.512041
10	9	643	11	Models_2_3	2705.56	0.767016	0.280324	0.0222222	0.0222222	0.0222222	0.0222222	0.0222222	0.0236407	0.167397	0.177752	0.0418803	0.177752
10	9	644	12	Models_2_4	2706.7	0.761387	0.326779	0.0222222	0.0222222	0.0222222	0.0222222	0.0222222	0.0541226	0.181962	0.45037	0.0418803	0.45037
10	9	645	13	Models_2_5	11511.7	0.817563	0.38524	0.0222222	0.0222222	0.0222222	0.0222222	0.0222222	0.0231481	0.0929415	0.40741	0.374444	0.40741
10	9	646	14	Models_2_6	2714.25	0.533082	0.108748	0.0222222	0.0222222	0.0222222	0.0222222	0.095066	0.0418803	0.0418803	0.0418803	0.0418803	0.095066
10	9	647	647	Models_1_2	2184.37	0.683749	0.182849	0.0241546	0.341978	0.112569	0.0373333	0.0418803	0.0418803	0.0418803	0.0418803	0.0418803	0.341978
10	9	648	648	Models_1_3	2195.08	0.757623	0.243267	0.0231481	0.0941745	0.380855	0.307922	0.233724	0.112309	0.123017	0.0427015	0.0418803	0.380855
10	9	649	649	Models_1_4	2217.75	0.722435	0.297394	0.0529742	0.119529	0.142764	0.253704	0.298527	0.3835	0.233166	0.082963	0.0418803	0.3835
10	9	650	650	Models_1_5	2212.72	0.687844	0.220093	0.0222222	0.0236407	0.438521	0.247497	0.0435556	0.0418803	0.0418803	0.0418803	0.0418803	0.438521
10	9	651	651	Models_1_6	2232.79	0.523324	0.108812	0.0857778	0.345752	0.0418803	0.0418803	0.0418803	0.0418803	0.0418803	0.0418803	0.0418803	0.345752
10	9	652	652	Models_1_7	2234.87	0.668889	0.20922	0.0222222	0.0222222	0.286275	0.56556	0.153093	0.083669	0.0418803	0.0418803	0.0418803	0.56556
10	9	653	653	Models_1_8	2239.52	0.687245	0.235561	0.0222222	0.0222222	0.314437	0.537037	0.189938	0.190236	0.0427015	0.0418803	0.0418803	0.537037
10	9	654	654	Models_1_9	2231.15	0.711108	0.259429	0.0222222	0.0222222	0.354245	0.385441	0.188354	0.190236	0.0427015	0.0418803	0.0418803	0.385441
10	9	655	655	Models_1_10	2224.39	0.726479	0.275371	0.0222222	0.0950242	0.396378	0.371757	0.198936	0.194224	0.0427015	0.0418803	0.0418803	0.396378
10	10	656	656	Models_3_2_3_4_5_6	19529.1	0.892413	0.577927	0.0536688	0.0536688	0.0536688	0.0568889	0.0953704	0.205776	0.28956	0.460651	0.454506	0.460651
10	10	657	657	Models_3_2_3_4_5	17827.2	0.885457	0.561061	0.0536688	0.0536688	0.0536688	0.0568889	0.0932462	0.242974	0.346698	0.459365	0.489489	0.489489
10	10	658	658	Models_3_2_3_4_6	9510.81	0.84077	0.458162	0.0536688	0.0536688	0.0536688	0.0536688	0.0965684	0.175979	0.313239	0.40332	0.316469	0.40332
10	10	659	659	Models_3_2_3_5_6	18507.7	0.881642	0.556621	0.0536688	0.0536688	0.0536688	0.0557734	0.0965684	0.17138	0.345672	0.484689	0.370146	0.484689
10	10	660	660	Models_3_2_4_5_6	19265.9	0.893975	0.58854	0.0536688	0.0536688	0.0536688	0.0557734	0.138519	0.206089	0.280697	0.400377	0.488265	0.488265
10	10	661	661	Models_3_3_4_5_6	17578	0.883452	0.554595	0.0536688	0.0536688	0.0536688	0.0536688	0.0954074	0.134221	0.262222	0.506355	0.379404	0.506355
10	10	662	662	Models_3_2_3_4	6179	0.82549	0.435795	0.0536688	0.0536688	0.0536688	0.0536688	0.0568889	0.179113	0.350831	0.393422	0.34575	0.393422
10	10	663	663	Models_3_2_3_5	13841.7	0.878896	0.553907	0.0536688	0.0536688	0.0536688	0.0568889	0.094161	0.142453	0.290404	0.410254	0.489554	0.489554
10	10	664	664	Models_3_2_3_6	6115.33	0.808669	0.436414	0.0536688	0.0536688	0.0536688	0.0536688	0.0568889	0.212002	0.234646	0.468496	0.253207	0.468496
10	10	665	665	Models_3_2_4_5	14913.7	0.889009	0.575567	0.0536688	0.0536688	0.0536688	0.0557734	0.0953704	0.20554	0.346698	0.458424	0.462011	0.462011
10	10	666	666	Models_3_2_4_6	6693.82	0.835203	0.441913	0.0536688	0.0536688	0.0536688	0.0536688	0.0965684	0.134242	0.355542	0.343848	0.346157	0.355542
10	10	667	667	Models_3_2_5_6	14921.9	0.879502	0.556808	0.0536688	0.0536688	0.0536688	0.0557734	0.14127	0.171417	0.349219	0.473808	0.361798	0.473808
10	10	668	668	Models_3_3_4_5	14933.1	0.873718	0.529095	0.0536688	0.0536688	0.0536688	0.0547009	0.0580499	0.176925	0.319162	0.534163	0.423837	0.534163
10	10	669	669	Models_3_3_4_6	6794.84	0.792789	0.372891	0.0536688	0.0536688	0.0536688	0.0536688	0.0557734	0.194985	0.299059	0.368788	0.318214	0.368788
10	10	670	670	Models_3_3_5_6	14866.6	0.866986	0.513817	0.0536688	0.0536688	0.0536688	0.0536688	0.0557734	0.0693767	0.366805	0.444561	0.40501	0.444561
10	10	671	671	Models_3_4_5_6	14909.1	0.879046	0.546494	0.0536688	0.0536688	0.0536688	0.0547009	0.14006	0.134497	0.23697	0.535348	0.420851	0.535348
10	10	672	672	Models_3_2_3	4382.33	0.791483	0.403272	0.0536688	0.0536688	0.0536688	0.0536688	0.0557734	0.17589	0.292693	0.365846	0.0960317	0.365846
10	10	673	673	Models_3_2_4	4393.88	0.815513	0.412289	0.0536688	0.0536688	0.0536688	0.0536688	0.0580499	0.172663	0.436936	0.34874	0.305868	0.436936
10	10	674	674	Models_3_2_5	12494.6	0.873673	0.536202	0.0536688	0.0536688	0.0536688	0.0557734	0.0965684	0.139082	0.367963	0.459704	0.406937	0.459704
10	10	675	675	Models_3_2_6	4399.78	0.797641	0.402968	0.0536688	0.0536688	0.0536688	0.0547009	0.0568889	0.173483	0.200131	0.493123	0.253632	0.493123
10	10	676	676	Models_3_3_4	4193.87	0.763597	0.34389	0.0536688	0.0536688	0.0536688	0.0536688	0.0536688	0.0965592	0.423019	0.322705	0.198704	0.423019
10	10	677	677	Models_3_3_5	11890.1	0.861877	0.504725	0.0536688	0.0536688	0.0536688	0.0536688	0.0547009	0.0966312	0.231385	0.464042	0.342857	0.464042
10	10	678	678	Models_3_3_6	4367.17	0.714913	0.212788	0.0536688	0.0536688	0.0536688	0.0536688	0.0547009	0.138519	0.286655	0.0960317	0.0960317	0.286655
10	10	679	679	Models_3_4_5	11931.2	0.873389	0.538479	0.0536688	0.0536688	0.0536688	0.0547009	0.0568889	0.141498	0.236088	0.470811	0.458255	0.470811
10	10	680	680	Models_3_4_6	4270.64	0.771633	0.353826	0.0536688	0.0536688	0.0536688	0.0536688	0.0981587	0.16809	0.366008	0.363642	0.0960317	0.366008
10	10	681	681	Models_3_5_6	11827.3	0.861132	0.512389	0.0536688	0.0536688	0.0536688	0.0536688	0.0942919	0.103757	0.341159	0.42779	0.382437	0.42779
10	10	682	682	Models_3_2	2297.64	0.77712	0.360149	0.0536688	0.0536688	0.0536688	0.0547009	0.0568889	0.141095	0.297789	0.351962	0.14016	0.351962
10	10	683	683	Models_3_3	2296.93	0.648421	0.169095	0.0536688	0.0536688	0.0536688	0.0536688	0.0536688	0.100137	0.242771	0.0960317	0.0960317	0.242771
10	10	684	684	Models_3_4	2257.49	0.736273	0.318829	0.0536688	0.0536688	0.0536688	0.0536688	0.0547009	0.172915	0.380442	0.287377	0.213836	0.380442
10	10	685	685	Models_3_5	9567.49	0.852358	0.488322	0.0536688	0.0536688	0.0536688	0.0536688	0.0547009	0.177609	0.306201	0.463873	0.354894	0.463873
10	10	686	686	Models_3_6	2262.36	0.64899	0.153734	0.0536688	0.0536688	0.0536688	0.0536688	0.0954416	0.0960317	0.0960317	0.0960317	0.0960317	0.0960317
10	10	698	698	Models_2_2_3_4_5_6	20303.7	0.909144	0.628082	0.0536688	0.0536688	0.0536688	0.0547009	0.0970433	0.094507	0.173352	0.422857	0.620176	0.620176
10	10	699	699	Models_2_2_3_4_5	19739.2	0.905942	0.617064	0.0536688	0.0536688	0.0536688	0.0547009	0.0547009	0.0939345	0.241894	0.394966	0.620176	0.620176
10	10	700	700	Models_2_2_3_4_6	9015.91	0.867987	0.500146	0.0536688	0.0536688	0.0536688	0.0547009	0.0547009	0.0954074	0.172626	0.22235	0.46381	0.46381
10	10	701	701	Models_2_2_3_5_6	16155.6	0.903249	0.614731	0.0536688	0.0536688	0.0536688	0.0536688	0.0557734	0.165171	0.305448	0.330204	0.266441	0.330204
10	10	702	702	Models_2_2_4_5_6	16736.7	0.903704	0.623352	0.0536688	0.0536688	0.0536688	0.0536688	0.0557734	0.0939345	0.269786	0.387446	0.566246	0.566246
10	10	703	703	Models_2_3_4_5_6	16614.1	0.905622	0.619833	0.0536688	0.0536688	0.0536688	0.0536688	0.0970433	0.0965684	0.172487	0.397385	0.548302	0.548302
10	10	704	704	Models_2_2_3_4	7201.94	0.858967	0.484531	0.0536688	0.0536688	0.0536688	0.0547009	0.0547009	0.0932462	0.166496	0.313157	0.388875	0.388875
10	10	705	705	Models_2_2_3_5	14988.6	0.90159	0.608869	0.0536688	0.0536688	0.0536688	0.0547009	0.0557734	0.0939345	0.304268	0.30785	0.640962	0.640962
10	10	706	706	Models_2_2_3_6	6526.5	0.846756	0.458822	0.0536688	0.0536688	0.0536688	0.0536688	0.0547009	0.0580499	0.266185	0.459889	0.211705	0.459889
10	10	707	707	Models_2_2_4_5	14678.1	0.89536	0.591909	0.0536688	0.0536688	0.0536688	0.0536688	0.0557734	0.131934	0.337606	0.398511	0.290509	0.398511
10	10	708	708	Models_2_2_4_6	6293.09	0.850695	0.463046	0.0536688	0.0536688	0.0536688	0.0536688	0.0547009	0.132453	0.202881	0.579122	0.0977778	0.579122
10	10	709	709	Models_2_2_5_6	14677.9	0.898851	0.616827	0.0536688	0.0536688	0.0536688	0.0536688	0.0557734	0.0618357	0.304402	0.311531	0.637115	0.637115
10	10	710	710	Models_2_3_4_5	14728.2	0.901843	0.607453	0.0536688	0.0536688	0.0536688	0.0547009	0.0970433	0.0993197	0.174139	0.400582	0.575334	0.575334
10	10	711	711	Models_2_3_4_6	6476.44	0.851649	0.451201	0.0536688	0.0536688	0.0536688	0.0536688	0.0547009	0.0557734	0.238025	0.382492	0.0960317	0.382492
10	10	712	712	Models_2_3_5_6	14597.5	0.896405	0.591988	0.0536688	0.0536688	0.0536688	0.0536688	0.0547009	0.094161	0.180312	0.338226	0.356398	0.356398
10	10	713	713	Models_2_4_5_6	14910.7	0.891491	0.600035	0.0536688	0.0536688	0.0536688	0.0536688	0.0959707	0.0932462	0.173287	0.389385	0.566207	0.566207
10	10	714	714	Models_2_2_3	4420.71	0.845833	0.469056	0.0536688	0.0536688	0.0536688	0.0536688	0.0547009	0.0580499	0.203094	0.318245	0.399657	0.399657
10	10	715	715	Models_2_2_4	4424.91	0.846262	0.459016	0.0536688	0.0536688	0.0536688	0.0536688	0.0547009	0.132453	0.205284	0.534048	0.285317	0.534048
10	10	716	716	Models_2_2_5	13034.3	0.899504	0.618609	0.0536688	0.0536688	0.0536688	0.0536688	0.0580499	0.127407	0.304402	0.310281	0.614888	0.614888
10	10	717	717	Models_2_2_6	4553.66	0.830648	0.441414	0.0536688	0.0536688	0.0536688	0.0536688	0.0536688	0.0977778	0.233734	0.440741	0.22716	0.440741
10	10	718	718	Models_2_3_4	4578.58	0.840168	0.430713	0.0536688	0.0536688	0.0536688	0.0536688	0.0942919	0.0568889	0.238255	0.475926	0.0977778	0.475926
10	10	719	719	Models_2_3_5	12768.8	0.891556	0.573643	0.0536688	0.0536688	0.0536688	0.0536688	0.0547009	0.094161	0.143951	0.31528	0.601481	0.601481
10	10	720	720	Models_2_3_6	4514.12	0.806787	0.336983	0.0536688	0.0536688	0.0536688	0.0536688	0.0536688	0.0557734	0.197725	0.369624	0.0960317	0.369624
10	10	721	721	Models_2_4_5	12692.7	0.885349	0.579916	0.0536688	0.0536688	0.0536688	0.0536688	0.0547009	0.0993197	0.20369	0.472705	0.54442	0.54442
10	10	722	722	Models_2_4_6	4654.58	0.804236	0.369545	0.0536688	0.0536688	0.0536688	0.0536688	0.0547009	0.102576	0.296166	0.342991	0.0960317	0.342991
10	10	723	723	Models_2_5_6	12607.4	0.869927	0.549904	0.0536688	0.0536688	0.0536688	0.0536688	0.0536688	0.0568889	0.207148	0.483355	0.334984	0.483355
10	10	724	724	Models_2_2	2488.95	0.809067	0.419744	0.0536688	0.0536688	0.0536688	0.0536688	0.0547009	0.139779	0.230394	0.503671	0.0977778	0.503671
10	10	725	725	Models_2_3	2349.65	0.788578	0.31104	0.0536688	0.0536688	0.0536688	0.0536688	0.0536688	0.0970433	0.132663	0.360843	0.0960317	0.360843
10	10	726	726	Models_2_4	2254.62	0.772216	0.336827	0.0536688	0.0536688	0.0536688	0.0536688	0.0536688	0.123948	0.370321	0.413951	0.0960317	0.413951
10	10	727	727	Models_2_5	10593.4	0.864233	0.528102	0.0536688	0.0536688	0.0536688	0.0536688	0.0536688	0.0580499	0.23874	0.385698	0.370146	0.385698
10	10	728	728	Models_2_6	2574.99	0.642691	0.156372	0.0536688	0.0536688	0.0536688	0.0536688	0.0954416	0.117373	0.118373	0.0960317	0.0960317	0.118373
10	10	729	729	Models_1_2	1977.05	0.777115	0.364626	0.0568889	0.207348	0.297789	0.517982	0.522063	0.36876	0.257657	0.0995885	0.0960317	0.522063
10	10	730	730	Models_1_3	1989.76	0.648428	0.171013	0.0536688	0.100137	0.430984	0.104019	0.0960317	0.0960317	0.0960317	0.0960317	0.0960317	0.430984
10	10	731	731	Models_1_4	1998.03	0.736853	0.322149	0.0536688	0.0547009	0.138688	0.295873	0.380442	0.363476	0.398968	0.241895	0.0995885	0.398968
10	10	732	732	Models_1_5	2028.82	0.731936	0.277355	0.0536688	0.0580499	0.488049	0.391577	0.0995885	0.0960317	0.0960317	0.0960317	0.0960317	0.488049
10	10	733	733	Models_1_6	2015.67	0.651043	0.162475	0.180169	0.261755	0.131416	0.0960317	0.0960317	0.0960317	0.0960317	0.0960317	0.0960317	0.261755
10	10	734	734	Models_1_7	2015.18	0.75249	0.322284	0.0536688	0.0547009	0.250488	0.522946	0.384634	0.103419	0.0960317	0.0960317	0.0960317	0.522946
10	10	735	735	Models_1_8	2048.52	0.751525	0.351704	0.0536688	0.0547009	0.361365	0.496868	0.419337	0.31979	0.103419	0.0960317	0.0960317	0.496868
10	10	736	736	Models_1_9	2185.31	0.779716	0.382188	0.0547009	0.206906	0.347725	0.569243	0.489018	0.431411	0.260553	0.109751	0.0960317	0.569243
10	10	737	737	Models_1_10	2180.47	0.782995	0.367345	0.099321	0.351004	0.474955	0.421842	0.153493	0.0960317	0.0960317	0.0960317	0.0960317	0.474955
30	8	738	738	Models_4_2_3_4_5	744.677	0.916355	0.741714	0.0632099	0.269149	0.542234	0.578015	0.510016	0.368887	0.43819	0.325513	0.0987654	0.578015
30	8	739	739	Models_4_2_3_4	723.912	0.902196	0.705979	0.0536688	0.0568889	0.132483	0.344938	0.486547	0.628995	0.444754	0.295741	0.200404	0.628995
30	8	740	740	Models_4_2_3_5	741.372	0.837256	0.585365	0.280183	0.560152	0.495658	0.377993	0.127635	0.0930909	0.0931217	0.0536688	0.0536688	0.560152
30	8	741	741	Models_4_2_4_5	752.365	0.888193	0.676922	0.0568889	0.21125	0.260881	0.379711	0.431371	0.561992	0.5695	0.313957	0.0661499	0.5695
30	8	742	742	Models_4_3_4_5	751.255	0.926176	0.759717	0.0646465	0.292769	0.53134	0.550936	0.566055	0.627024	0.475176	0.314912	0.101342	0.627024
30	8	743	743	Models_4_2_3	721.759	0.878953	0.659176	0.0547009	0.0580499	0.0944975	0.278563	0.407538	0.434921	0.567875	0.455102	0.223235	0.567875
30	8	744	744	Models_4_2_4	728.888	0.885238	0.695873	0.0592593	0.206672	0.319917	0.415895	0.621112	0.573782	0.444262	0.324392	0.223235	0.621112
30	8	745	745	Models_4_2_5	745.178	0.90351	0.730977	0.131631	0.302579	0.441181	0.538256	0.571618	0.532952	0.469394	0.324488	0.0646465	0.571618
30	8	746	746	Models_4_3_4	728.081	0.868899	0.662252	0.0536688	0.0605201	0.198086	0.278201	0.451298	0.467147	0.573331	0.247863	0.167492	0.573331
30	8	747	747	Models_4_3_5	730.9	0.904086	0.667629	0.0580499	0.179994	0.297032	0.51915	0.657516	0.633417	0.607079	0.324529	0.0661499	0.657516
30	8	748	748	Models_4_4_5	747.288	0.899137	0.705739	0.234349	0.514921	0.589053	0.488443	0.504308	0.493528	0.321859	0.0646465	0.0547009	0.589053
30	9	749	749	Models_4_2_3_4_5	761.503	0.88494	0.615359	0.0246914	0.138557	0.286516	0.420317	0.510401	0.583857	0.511426	0.307536	0.0494949	0.583857
30	9	750	750	Models_4_2_3_4	739.427	0.818736	0.500983	0.0655724	0.105851	0.21898	0.371448	0.502452	0.413428	0.238333	0.120948	0.0418803	0.502452
30	9	751	751	Models_4_2_3_5	760.405	0.878854	0.592843	0.0252525	0.19216	0.376064	0.488742	0.637331	0.487801	0.438145	0.262622	0.047343	0.637331
30	9	752	752	Models_4_2_4_5	767.531	0.852416	0.580871	0.0241546	0.274084	0.347425	0.529822	0.622078	0.564572	0.306956	0.153704	0.0463357	0.622078
30	9	753	753	Models_4_3_4_5	769.533	0.843506	0.548927	0.0222222	0.106268	0.282123	0.309077	0.474943	0.563938	0.484781	0.222763	0.0453704	0.563938
30	9	754	754	Models_4_2_3	746.497	0.85345	0.538642	0.0241546	0.160879	0.4154	0.553545	0.358333	0.326076	0.0825655	0.0435556	0.0418803	0.553545
30	9	755	755	Models_4_2_4	744.446	0.837997	0.550616	0.0660649	0.130151	0.383028	0.332724	0.516498	0.445726	0.274118	0.152233	0.107937	0.516498
30	9	756	756	Models_4_2_5	753.498	0.855374	0.552135	0.104878	0.306981	0.431851	0.494786	0.533383	0.452937	0.248883	0.087683	0.0453704	0.533383
30	9	757	757	Models_4_3_4	739.008	0.820431	0.50221	0.0665788	0.17208	0.208547	0.33683	0.443728	0.400643	0.207901	0.104974	0.0805926	0.443728
30	9	758	758	Models_4_3_5	759.278	0.856953	0.526697	0.0665788	0.221389	0.457199	0.549158	0.499564	0.375187	0.18467	0.0463357	0.0427015	0.549158
30	9	759	759	Models_4_4_5	790.722	0.824672	0.535707	0.378582	0.328879	0.26588	0.40474	0.471824	0.308871	0.216268	0.0888889	0.0463357	0.471824
30	10	760	760	Models_4_2_3_4_5	750.936	0.921219	0.749525	0.273113	0.41953	0.45703	0.505933	0.516032	0.641211	0.621998	0.403896	0.161176	0.641211
30	10	761	761	Models_4_2_3_4	731.945	0.853906	0.593023	0.126033	0.204233	0.363851	0.428854	0.458924	0.257657	0.109751	0.0977778	0.0960317	0.458924
30	10	762	762	Models_4_2_3_5	740.111	0.923313	0.739667	0.332925	0.345044	0.384065	0.575606	0.679172	0.628258	0.450135	0.257111	0.114421	0.679172
30	10	763	763	Models_4_2_4_5	760.681	0.921456	0.753426	0.17633	0.42655	0.34376	0.461515	0.580532	0.650346	0.550707	0.346049	0.119506	0.650346
30	10	764	764	Models_4_3_4_5	762.281	0.880983	0.648372	0.148148	0.475366	0.772047	0.64193	0.47102	0.31321	0.264246	0.229136	0.105447	0.772047
30	10	765	765	Models_4_2_3	737.033	0.888708	0.656164	0.0568889	0.29358	0.346128	0.468618	0.63457	0.52562	0.256291	0.149257	0.0960317	0.63457
30	10	766	766	Models_4_2_4	728.031	0.885274	0.642948	0.0922451	0.263554	0.323604	0.51746	0.580556	0.503134	0.348097	0.18294	0.0960317	0.580556
30	10	767	767	Models_4_2_5	753.096	0.915803	0.716975	0.243635	0.400875	0.386457	0.446983	0.591985	0.643206	0.651063	0.321807	0.122222	0.651063
30	10	768	768	Models_4_3_4	730.086	0.884924	0.646675	0.139779	0.253802	0.372255	0.487228	0.528709	0.551351	0.486995	0.338416	0.147019	0.551351
30	10	769	769	Models_4_3_5	749.16	0.909297	0.668626	0.0580499	0.190337	0.350301	0.41723	0.496329	0.521886	0.621661	0.456717	0.196176	0.621661
30	10	770	770	Models_4_4_5	750.749	0.893486	0.673475	0.175214	0.395561	0.575095	0.65764	0.510509	0.351531	0.222438	0.147062	0.0977778	0.65764
80	8	771	771	Models_4_2_3_4_5	338.716	0.914048	0.806582	0.456039	0.636223	0.640901	0.620938	0.678005	0.595857	0.47179	0.321077	0.224498	0.678005
80	8	772	772	Models_4_2_3_4	320.721	0.914037	0.797785	0.184537	0.454255	0.504236	0.659947	0.586195	0.455425	0.37757	0.292106	0.199097	0.659947
80	8	773	773	Models_4_2_3_5	333.164	0.917064	0.807713	0.175036	0.497444	0.688666	0.702462	0.609331	0.47179	0.358783	0.200917	0.101342	0.702462
80	8	774	774	Models_4_2_4_5	341.386	0.914302	0.811033	0.200993	0.455121	0.729919	0.745679	0.723104	0.680447	0.477376	0.41837	0.173847	0.745679
80	8	775	775	Models_4_3_4_5	340.116	0.910909	0.778498	0.184704	0.57987	0.734997	0.671887	0.618392	0.522283	0.342162	0.174325	0.0632099	0.734997
80	8	776	776	Models_4_2_3	322.228	0.894657	0.765307	0.0944975	0.324388	0.500741	0.512585	0.493347	0.487487	0.316498	0.225606	0.137453	0.512585
80	8	777	777	Models_4_2_4	318.249	0.903904	0.776937	0.488951	0.616665	0.532756	0.37215	0.315938	0.22734	0.200404	0.0975561	0.0557734	0.616665
80	8	778	778	Models_4_2_5	336.278	0.909561	0.758887	0.27866	0.705858	0.708544	0.678372	0.44691	0.41802	0.252972	0.169904	0.0646465	0.708544
80	8	779	779	Models_4_3_4	320.796	0.884281	0.758953	0.117333	0.289019	0.39317	0.59734	0.550847	0.451059	0.323108	0.22497	0.137453	0.59734
80	8	780	780	Models_4_3_5	337.748	0.913416	0.809104	0.0960456	0.286813	0.549399	0.685964	0.705792	0.622011	0.493231	0.347738	0.135758	0.705792
80	8	781	781	Models_4_4_5	337.329	0.90453	0.797747	0.472927	0.623351	0.568363	0.600984	0.495291	0.454966	0.377695	0.208601	0.0592593	0.623351
80	9	782	782	Models_4_2_3_4_5	321.853	0.894705	0.716163	0.0721859	0.359714	0.530795	0.668215	0.572398	0.33523	0.180092	0.132507	0.0834656	0.668215
80	9	783	783	Models_4_2_3_4	303.8	0.895276	0.729051	0.297163	0.477867	0.645681	0.425131	0.361194	0.275579	0.16108	0.0828283	0.0435556	0.645681
80	9	784	784	Models_4_2_3_5	324.797	0.908975	0.735109	0.216049	0.393316	0.603688	0.758515	0.628157	0.439492	0.245453	0.153704	0.0842925	0.758515
80	9	785	785	Models_4_2_4_5	327.709	0.890764	0.713965	0.381818	0.524141	0.542583	0.481798	0.403135	0.245593	0.151211	0.086532	0.0444444	0.542583
80	9	786	786	Models_4_3_4_5	326.602	0.8501	0.624043	0.164047	0.44283	0.480759	0.47101	0.41164	0.230699	0.085948	0.0819109	0.0418803	0.480759
80	9	787	787	Models_4_2_3	304.645	0.717491	0.402075	0.118368	0.544654	0.336232	0.0494949	0.0444444	0.0435556	0.0418803	0.0418803	0.0418803	0.544654
80	9	788	788	Models_4_2_4	303.346	0.876306	0.656333	0.18456	0.436381	0.594831	0.627026	0.471967	0.401934	0.159544	0.0874074	0.0453704	0.627026
80	9	789	789	Models_4_2_5	322.751	0.886908	0.689176	0.404486	0.449653	0.534981	0.530636	0.486884	0.356177	0.181847	0.0840358	0.0453704	0.534981
80	9	790	790	Models_4_3_4	300.64	0.854779	0.646362	0.05391	0.204735	0.512844	0.583661	0.416381	0.363373	0.191799	0.0854321	0.0435556	0.583661
80	9	791	791	Models_4_3_5	325.472	0.502552	0.198191	0.0181406	0.0181406	0.297076	0.0418803	0.0418803	0.0418803	0.0418803	0.0418803	0.0418803	0.297076
80	9	792	792	Models_4_4_5	325.45	0.857889	0.665684	0.467222	0.60202	0.586667	0.40549	0.365017	0.279753	0.224815	0.121073	0.0483951	0.60202
80	10	793	793	Models_4_2_3_4_5	317.579	0.927317	0.80933	0.239	0.39961	0.589091	0.613324	0.680981	0.597885	0.505169	0.349197	0.128042	0.680981
80	10	794	794	Models_4_2_3_4	298.976	0.918342	0.791926	0.127465	0.362024	0.545907	0.488042	0.595262	0.611026	0.50425	0.322347	0.156286	0.611026
80	10	795	795	Models_4_2_3_5	321.044	0.909665	0.769904	0.0980552	0.265009	0.49037	0.522835	0.651858	0.620553	0.413704	0.261032	0.116908	0.651858
80	10	796	796	Models_4_2_4_5	323.4	0.908249	0.770332	0.0748538	0.371956	0.487642	0.543452	0.663562	0.615777	0.536688	0.321807	0.193333	0.663562
80	10	797	797	Models_4_3_4_5	324.183	0.925424	0.793842	0.206173	0.490162	0.686808	0.727407	0.63206	0.407394	0.261575	0.196176	0.109751	0.727407
80	10	798	798	Models_4_2_3	298.825	0.92285	0.793376	0.129032	0.351852	0.460288	0.487094	0.527868	0.547625	0.480537	0.241263	0.119506	0.547625
80	10	799	799	Models_4_2_4	301.268	0.914345	0.782591	0.125025	0.381848	0.458984	0.559438	0.581737	0.459531	0.338926	0.244509	0.141934	0.581737
80	10	800	800	Models_4_2_5	308.681	0.907576	0.756329	0.269192	0.493461	0.707487	0.734417	0.561945	0.379524	0.233077	0.199153	0.107556	0.734417
80	10	801	801	Models_4_3_4	298.94	0.891946	0.716618	0.248254	0.537493	0.668469	0.617709	0.565065	0.433583	0.320873	0.18321	0.105447	0.668469
80	10	802	802	Models_4_3_5	319.635	0.921936	0.774998	0.192992	0.50885	0.665465	0.604829	0.543044	0.505169	0.348609	0.164571	0.114421	0.665465
80	10	803	803	Models_4_4_5	320.734	0.89833	0.764369	0.306061	0.662346	0.727998	0.63746	0.483821	0.353134	0.255736	0.148395	0.107556	0.727998
10	8	804	804	Models_4_2_3_4_5	2277.15	0.88283	0.613474	0.0547009	0.097947	0.210611	0.451559	0.507855	0.480709	0.417305	0.393296	0.13246	0.507855
10	8	805	805	Models_4_2_3_4	2261.4	0.801435	0.432452	0.0536688	0.0547009	0.127379	0.519577	0.613264	0.37544	0.222617	0.094159	0.0536688	0.613264
10	8	806	806	Models_4_2_3_5	2298.91	0.867946	0.592691	0.0547009	0.0557734	0.138769	0.347609	0.498838	0.561956	0.418086	0.362122	0.165404	0.561956
10	8	807	807	Models_4_2_4_5	2312.39	0.864583	0.599506	0.0975561	0.169166	0.506328	0.580905	0.408412	0.446895	0.513135	0.334818	0.136703	0.580905
10	8	808	808	Models_4_3_4_5	2338.7	0.887176	0.613878	0.0547009	0.171878	0.37374	0.375931	0.482417	0.624758	0.451772	0.321612	0.0618357	0.624758
10	8	809	809	Models_4_2_3	2405.01	0.76958	0.333982	0.0536688	0.162818	0.297407	0.390967	0.281545	0.198132	0.0868175	0.0536688	0.0536688	0.390967
10	8	810	810	Models_4_2_4	2391.7	0.770386	0.378588	0.0536688	0.0536688	0.135076	0.293546	0.341835	0.425735	0.200568	0.132947	0.0952796	0.425735
10	8	811	811	Models_4_2_5	2459.07	0.808197	0.480603	0.0954074	0.171675	0.353823	0.452031	0.361812	0.429136	0.342264	0.168499	0.177905	0.452031
10	8	812	812	Models_4_3_4	2396.83	0.799051	0.388551	0.0536688	0.098719	0.135379	0.302509	0.372106	0.330693	0.189998	0.17241	0.0547009	0.372106
10	8	813	813	Models_4_3_5	2433.61	0.859263	0.529056	0.0547009	0.100026	0.331957	0.563186	0.585273	0.507648	0.353786	0.173155	0.0568889	0.585273
10	8	814	814	Models_4_4_5	2431	0.853476	0.548535	0.101342	0.367164	0.50831	0.423639	0.57315	0.4539	0.383649	0.169573	0.0547009	0.57315
10	9	815	815	Models_4_2_3_4_5	1948.03	0.820648	0.443292	0.0222222	0.0236407	0.0988951	0.200325	0.400422	0.352161	0.566225	0.220034	0.0444444	0.566225
10	9	816	816	Models_4_2_3_4	1915.37	0.776484	0.355755	0.0222222	0.0652711	0.371287	0.418561	0.376285	0.326726	0.047343	0.0418803	0.0418803	0.418561
10	9	817	817	Models_4_2_3_5	1968.93	0.831891	0.38442	0.0222222	0.0537669	0.235586	0.192593	0.469514	0.35783	0.293633	0.0463357	0.0418803	0.469514
10	9	818	818	Models_4_2_4_5	1986.2	0.773044	0.398895	0.0226757	0.0246914	0.280107	0.326043	0.485476	0.410126	0.294056	0.123269	0.0427015	0.485476
10	9	819	819	Models_4_3_4_5	1983.79	0.818999	0.396672	0.0222222	0.103618	0.170549	0.391537	0.406738	0.379513	0.446884	0.149232	0.0786749	0.446884
10	9	820	820	Models_4_2_3	1926.16	0.783659	0.314538	0.0222222	0.0222222	0.0271003	0.318572	0.48058	0.351407	0.155051	0.0816508	0.0418803	0.48058
10	9	821	821	Models_4_2_4	1909.45	0.771806	0.299697	0.0222222	0.2009	0.471664	0.323977	0.169031	0.145965	0.227236	0.195557	0.0833333	0.471664
10	9	822	822	Models_4_2_5	1995.26	0.780522	0.376718	0.0226757	0.0246914	0.101235	0.371504	0.441587	0.421197	0.562877	0.186218	0.0444444	0.562877
10	9	823	823	Models_4_3_4	1930.81	0.766713	0.357766	0.106999	0.0462462	0.278659	0.319567	0.33603	0.284767	0.154584	0.0814815	0.0427015	0.33603
10	9	824	824	Models_4_3_5	1976.59	0.823938	0.397456	0.0226757	0.104878	0.332033	0.335752	0.526963	0.197028	0.182011	0.0435556	0.0418803	0.526963
10	9	825	825	Models_4_4_5	1967.79	0.773559	0.329915	0.0231481	0.0647343	0.13811	0.134568	0.179055	0.436538	0.395414	0.208187	0.0435556	0.436538
10	10	826	826	Models_4_2_3_4_5	1953.3	0.873838	0.540663	0.0568889	0.137372	0.265185	0.296292	0.228741	0.38509	0.59985	0.511179	0.147318	0.59985
10	10	827	827	Models_4_2_3_4	1920.27	0.827461	0.426372	0.0557734	0.212123	0.289682	0.42663	0.398519	0.375205	0.182014	0.137545	0.0960317	0.42663
10	10	828	828	Models_4_2_3_5	1953.62	0.851279	0.40215	0.0580499	0.127407	0.189681	0.328418	0.393876	0.382976	0.432033	0.348704	0.25608	0.432033
10	10	829	829	Models_4_2_4_5	1956.11	0.883132	0.478132	0.0547009	0.139374	0.140951	0.262053	0.392485	0.524332	0.484437	0.469606	0.354173	0.524332
10	10	830	830	Models_4_3_4_5	1940.18	0.885755	0.563993	0.0557734	0.137631	0.316883	0.543804	0.415131	0.555077	0.259052	0.101468	0.0960317	0.555077
10	10	831	831	Models_4_2_3	1916.2	0.812639	0.401285	0.0547009	0.173466	0.229899	0.469662	0.3245	0.34308	0.243858	0.215889	0.101468	0.469662
10	10	832	832	Models_4_2_4	1933.69	0.801366	0.384215	0.0557734	0.173847	0.41108	0.502192	0.438138	0.375556	0.271285	0.277866	0.101468	0.502192
10	10	833	833	Models_4_2_5	1949.49	0.865263	0.50617	0.0976296	0.176085	0.345693	0.417086	0.444509	0.439815	0.22878	0.0995885	0.0960317	0.444509
10	10	834	834	Models_4_3_4	1913.84	0.823954	0.397604	0.0536688	0.0568889	0.173161	0.306389	0.414459	0.392428	0.4595	0.304072	0.138639	0.4595
10	10	835	835	Models_4_3_5	1963.68	0.870098	0.539994	0.0557734	0.214261	0.265003	0.391357	0.433907	0.499193	0.581261	0.28703	0.114421	0.581261
10	10	836	836	Models_4_4_5	1942.65	0.8281	0.458542	0.1	0.292381	0.247847	0.453203	0.568047	0.442538	0.430697	0.114421	0.0960317	0.568047

## Sheet: AVERAGES_VAL
									f1 multiclass - wieghted
WS	Name	Type	RRI	Nassal	Channels	Time	AUROC	AUPR	f1_T_0.1	f1_T_0.2	f1_T_0.3	f1_T_0.4	f1_T_0.5	f1_T_0.6	f1_T_0.7	f1_T_0.8	f1_T_0.9	Max_f1_ahiC
80	Models_2_2_3_4_5_6	NN1ch-LGBM-3	Y	Y	ABDOMINAL_CHEST_NASSAL_SPO2_RRI	3098.88	0.922728	0.793361	0.0574292	0.0721135	0.108213	0.257509	0.387818	0.502944	0.622308	0.62707	0.284417	0.62707
80	Models_3_2_3_4_5_6	NN1ch-LGBM-1	Y	Y	ABDOMINAL_CHEST_NASSAL_SPO2_RRI	2979.26	0.918328	0.787662	0.0438881	0.0582744	0.0893266	0.242092	0.391912	0.54525	0.694649	0.613161	0.313354	0.694649
80	Models_2_2_3_4_5	NN1ch-LGBM-3	N	Y	ABDOMINAL_CHEST_NASSAL_SPO2	2773.97	0.920634	0.786428	0.0431866	0.0573216	0.122355	0.238162	0.401777	0.531882	0.640112	0.506011	0.188937	0.640112
80	Models_2_2_3_5_6	NN1ch-LGBM-3	Y	N	ABDOMINAL_CHEST_SPO2_RRI	2766.39	0.919594	0.786245	0.0567276	0.0713617	0.107473	0.280638	0.389014	0.506041	0.58921	0.555475	0.282198	0.58921
80	Models_3_2_4_5_6	NN1ch-LGBM-1	Y	Y	ABDOMINAL_NASSAL_SPO2_RRI	2708.14	0.914138	0.782461	0.04426	0.0700827	0.0977127	0.2023	0.351726	0.538311	0.718751	0.592212	0.31263	0.718751
80	Models_2_3_4_5	NN1ch-LGBM-3	N	Y	CHEST_NASSAL_SPO2	2419.84	0.916903	0.780115	0.0435306	0.0577378	0.0927944	0.233205	0.312602	0.488751	0.684196	0.581146	0.177416	0.684196
80	Models_2_2_4_5	NN1ch-LGBM-3	N	Y	ABDOMINAL_NASSAL_SPO2	2418.45	0.916083	0.778609	0.0574292	0.0589104	0.122408	0.273557	0.382099	0.519577	0.593123	0.550624	0.310665	0.593123
80	Models_3_2_4_5	NN1ch-LGBM-1	N	Y	ABDOMINAL_NASSAL_SPO2	2372.3	0.912621	0.777715	0.0438881	0.058131	0.109295	0.223945	0.392789	0.593668	0.732301	0.556266	0.266782	0.732301
80	Models_2_2_4_5_6	NN1ch-LGBM-3	Y	Y	ABDOMINAL_NASSAL_SPO2_RRI	2776.18	0.915578	0.777401	0.0435306	0.0579091	0.114054	0.266749	0.401665	0.552875	0.620851	0.590007	0.247318	0.620851
80	Models_4_2_3_4_5	NN2D	N	Y	ABDOMINAL_CHEST_NASSAL_SPO2	326.049	0.912024	0.777358	0.255741	0.465182	0.586929	0.634159	0.643795	0.509657	0.385684	0.267594	0.145335	0.643795
80	Models_3_2_3_4_5	NN1ch-LGBM-1	N	Y	ABDOMINAL_CHEST_NASSAL_SPO2	2690.06	0.91441	0.776935	0.0567276	0.0573443	0.0835124	0.225948	0.419398	0.534251	0.628302	0.493222	0.214885	0.628302
80	Models_3_2_3_5_6	NN1ch-LGBM-1	Y	N	ABDOMINAL_CHEST_SPO2_RRI	2698.3	0.912479	0.775163	0.0574292	0.0576303	0.0861841	0.156489	0.410434	0.544505	0.550761	0.421548	0.238325	0.550761
80	Models_4_2_3_4	NN2D	N	Y	ABDOMINAL_CHEST_NASSAL	307.832	0.909218	0.772921	0.203055	0.431382	0.565275	0.524373	0.514217	0.447344	0.347634	0.232427	0.132979	0.565275
80	Models_2_3_4_5_6	NN1ch-LGBM-3	Y	Y	CHEST_NASSAL_SPO2_RRI	2786.11	0.91464	0.771586	0.0435306	0.0577378	0.0927975	0.219982	0.297346	0.528257	0.662079	0.572983	0.180913	0.662079
80	Models_4_2_3_5	NN2D	N	N	ABDOMINAL_CHEST_SPO2	326.335	0.911901	0.770909	0.163047	0.385256	0.594242	0.661271	0.629782	0.510611	0.339313	0.205218	0.100848	0.661271
80	Models_2_2_5_6	NN1ch-LGBM-3	Y	N	ABDOMINAL_SPO2_RRI	2434.22	0.911818	0.770835	0.0572872	0.0460601	0.0884506	0.185207	0.420093	0.553746	0.566115	0.358723	0.177072	0.566115
80	Models_2_2_3_5	NN1ch-LGBM-3	N	N	ABDOMINAL_CHEST_SPO2	2428.78	0.914391	0.770444	0.0438881	0.0829751	0.122062	0.249809	0.398274	0.499226	0.598179	0.590173	0.187402	0.598179
80	Models_3_2_3_5	NN1ch-LGBM-1	N	N	ABDOMINAL_CHEST_SPO2	2382.75	0.910032	0.770161	0.0442322	0.0583817	0.113489	0.242554	0.425789	0.526176	0.654919	0.591236	0.311316	0.654919
80	Models_3_3_4_5	NN1ch-LGBM-1	N	Y	CHEST_NASSAL_SPO2	2359.91	0.91129	0.768312	0.0438881	0.0579091	0.111889	0.22868	0.394421	0.491437	0.687521	0.624438	0.245333	0.687521
80	Models_3_3_4_5_6	NN1ch-LGBM-1	Y	Y	CHEST_NASSAL_SPO2_RRI	2715.74	0.911618	0.7681	0.0572872	0.056924	0.0996911	0.216048	0.370665	0.495339	0.695467	0.599487	0.20162	0.695467
80	Models_2_2_5	NN1ch-LGBM-3	N	N	ABDOMINAL_SPO2	2072.24	0.910159	0.768024	0.0579888	0.057369	0.134315	0.233092	0.418497	0.538696	0.584333	0.561234	0.261113	0.584333
80	Models_4_2_4_5	NN2D	N	Y	ABDOMINAL_NASSAL_SPO2	330.832	0.904438	0.76511	0.219222	0.450406	0.586715	0.59031	0.5966	0.513939	0.388425	0.27557	0.137208	0.5966
80	Models_3_2_5	NN1ch-LGBM-1	N	N	ABDOMINAL_SPO2	2029.82	0.905086	0.76293	0.0438881	0.0579089	0.0775554	0.182846	0.384097	0.617971	0.648619	0.493375	0.217862	0.648619
80	Models_3_2_5_6	NN1ch-LGBM-1	Y	N	ABDOMINAL_SPO2_RRI	2360.28	0.90458	0.761442	0.0435306	0.0573076	0.0902832	0.228936	0.405638	0.540039	0.707558	0.530244	0.280011	0.707558
80	Models_2_4_5_6	NN1ch-LGBM-3	Y	Y	NASSAL_SPO2_RRI	2415.46	0.902863	0.754596	0.0572872	0.0571497	0.0634455	0.183931	0.388884	0.560106	0.648817	0.571783	0.122242	0.648817
80	Models_3_2_3_4_6	NN1ch-LGBM-1	Y	Y	ABDOMINAL_CHEST_NASSAL_RRI	1395.64	0.899728	0.752895	0.0435306	0.0794755	0.100669	0.19366	0.315166	0.485307	0.570575	0.51838	0.277103	0.570575
80	Models_2_4_5	NN1ch-LGBM-3	N	Y	NASSAL_SPO2	2091.23	0.900931	0.751506	0.0576313	0.057358	0.0813656	0.207665	0.36947	0.521968	0.623086	0.644276	0.221403	0.644276
80	Models_3_4_5	NN1ch-LGBM-1	N	Y	NASSAL_SPO2	2031.83	0.900511	0.751046	0.0438881	0.0575187	0.107539	0.201834	0.370826	0.546066	0.737136	0.617801	0.250232	0.737136
80	Models_2_3_5	NN1ch-LGBM-3	N	N	CHEST_SPO2	2085.45	0.909145	0.751001	0.0431866	0.0580733	0.120158	0.201975	0.329482	0.532226	0.632829	0.542943	0.136249	0.632829
80	Models_2_2_3_4	NN1ch-LGBM-3	N	Y	ABDOMINAL_CHEST_NASSAL	1089.6	0.904484	0.750138	0.0436818	0.0558846	0.134069	0.178841	0.266822	0.4465	0.578102	0.433369	0.240008	0.578102
80	Models_3_2_3_4	NN1ch-LGBM-1	N	Y	ABDOMINAL_CHEST_NASSAL	1062.47	0.898101	0.749308	0.0435306	0.0678313	0.116389	0.159472	0.325069	0.487444	0.587422	0.5259	0.271894	0.587422
80	Models_3_4_5_6	NN1ch-LGBM-1	Y	Y	NASSAL_SPO2_RRI	2359.26	0.900507	0.748285	0.0431866	0.0570493	0.0846312	0.202158	0.337903	0.486894	0.716345	0.538621	0.15009	0.716345
80	Models_2_2_4	NN1ch-LGBM-3	N	Y	ABDOMINAL_NASSAL	737.706	0.896729	0.744476	0.0567276	0.0692413	0.130618	0.194177	0.299192	0.471245	0.541915	0.527733	0.280305	0.541915
80	Models_4_4_5	NN2D	N	Y	NASSAL_SPO2	327.838	0.886916	0.7426	0.415403	0.629239	0.627676	0.547978	0.448043	0.362618	0.286082	0.159356	0.0717366	0.629239
80	Models_3_2_4_6	NN1ch-LGBM-1	Y	Y	ABDOMINAL_NASSAL_RRI	1067.65	0.893367	0.740908	0.0431866	0.05721	0.106539	0.158473	0.371462	0.516344	0.606785	0.507506	0.283228	0.606785
80	Models_3_3_5_6	NN1ch-LGBM-1	Y	N	CHEST_SPO2_RRI	2364.19	0.901435	0.740797	0.0431866	0.0567812	0.0870423	0.182263	0.352354	0.508825	0.68048	0.561357	0.156593	0.68048
80	Models_4_2_4	NN2D	N	Y	ABDOMINAL_NASSAL	307.621	0.898185	0.73862	0.266179	0.478298	0.528857	0.519538	0.456547	0.362935	0.232958	0.143158	0.0810259	0.528857
80	Models_2_2_3_4_6	NN1ch-LGBM-3	Y	Y	ABDOMINAL_CHEST_NASSAL_RRI	1435.48	0.898606	0.738467	0.0435306	0.0681283	0.110097	0.178727	0.305936	0.46836	0.522002	0.471557	0.153643	0.522002
80	Models_2_2_4_6	NN1ch-LGBM-3	Y	Y	ABDOMINAL_NASSAL_RRI	1084.12	0.894369	0.735272	0.0431866	0.0580239	0.114018	0.190545	0.288944	0.47587	0.555189	0.506718	0.212335	0.555189
80	Models_2_3_5_6	NN1ch-LGBM-3	Y	N	CHEST_SPO2_RRI	2416	0.901876	0.735265	0.0572872	0.0569497	0.0724354	0.183766	0.288421	0.527982	0.629253	0.541035	0.159826	0.629253
80	Models_3_2_4	NN1ch-LGBM-1	N	Y	ABDOMINAL_NASSAL	742.305	0.889195	0.734978	0.0431866	0.0453485	0.0812388	0.167227	0.396241	0.5155	0.60181	0.476305	0.261316	0.60181
80	Models_4_2_5	NN2D	N	N	ABDOMINAL_SPO2	322.57	0.901348	0.734797	0.317446	0.549657	0.650338	0.647808	0.49858	0.384574	0.222632	0.151031	0.0725241	0.650338
80	Models_3_3_5	NN1ch-LGBM-1	N	N	CHEST_SPO2	2034.77	0.898648	0.732644	0.0435306	0.0576829	0.0980889	0.235424	0.37972	0.509318	0.655063	0.599479	0.231736	0.655063
80	Models_4_3_4_5	NN2D	N	Y	CHEST_NASSAL_SPO2	330.3	0.895478	0.732128	0.184975	0.504287	0.634188	0.623435	0.554031	0.386792	0.229895	0.150804	0.0716136	0.634188
80	Models_2_2_3	NN1ch-LGBM-3	N	N	ABDOMINAL_CHEST	730.21	0.890189	0.731089	0.0431866	0.0902078	0.101944	0.176759	0.288815	0.437748	0.494021	0.526876	0.354426	0.526876
80	Models_2_2_3_6	NN1ch-LGBM-3	Y	N	ABDOMINAL_CHEST_RRI	1086.25	0.893066	0.728471	0.0431866	0.0575367	0.112436	0.182904	0.29265	0.424097	0.479362	0.473291	0.168379	0.479362
80	Models_3_2_3_6	NN1ch-LGBM-1	Y	N	ABDOMINAL_CHEST_RRI	1065.21	0.88446	0.727047	0.0431866	0.0794755	0.100761	0.178525	0.241713	0.440276	0.556251	0.456542	0.160549	0.556251
80	Models_2_3_4_6	NN1ch-LGBM-3	Y	Y	CHEST_NASSAL_RRI	1073.23	0.889956	0.723582	0.0431866	0.0706405	0.112333	0.136368	0.275312	0.406235	0.47976	0.489744	0.132077	0.489744
80	Models_3_2_3	NN1ch-LGBM-1	N	N	ABDOMINAL_CHEST	742.149	0.881676	0.72224	0.0435306	0.0816009	0.11468	0.166364	0.297524	0.455145	0.547333	0.477679	0.229948	0.547333
80	Models_3_3_4_6	NN1ch-LGBM-1	Y	Y	CHEST_NASSAL_RRI	1055.75	0.883785	0.720788	0.0431866	0.0814753	0.0998515	0.160442	0.26791	0.368322	0.495011	0.5133	0.290083	0.5133
30	Models_2_2_3_4_5_6	NN1ch-LGBM-3	Y	Y	ABDOMINAL_CHEST_NASSAL_SPO2_RRI	7090.87	0.921463	0.719401	0.0431866	0.0438746	0.0583463	0.059204	0.107428	0.230447	0.373312	0.539113	0.398619	0.539113
80	Models_2_3_4	NN1ch-LGBM-3	N	Y	CHEST_NASSAL	727.027	0.885768	0.716972	0.0435306	0.0708212	0.111789	0.145561	0.284597	0.372702	0.512409	0.444636	0.177053	0.512409
80	Models_3_3_4	NN1ch-LGBM-1	N	Y	CHEST_NASSAL	744.697	0.880774	0.715188	0.0431866	0.0676489	0.101282	0.183063	0.282415	0.458521	0.509405	0.443723	0.151096	0.509405
80	Models_2_2_6	NN1ch-LGBM-3	Y	N	ABDOMINAL_RRI	736.383	0.880582	0.714189	0.0431866	0.0450501	0.101371	0.178624	0.251334	0.421516	0.503091	0.422424	0.105741	0.503091
80	Models_2_2	NN1ch-LGBM-3	N	N	ABDOMINAL	392.869	0.872412	0.711061	0.0431866	0.0561271	0.100614	0.131728	0.25374	0.48004	0.437155	0.348584	0.139585	0.48004
80	Models_4_3_4	NN2D	N	Y	CHEST_NASSAL	306.792	0.877002	0.707311	0.139832	0.343749	0.524828	0.59957	0.510764	0.416005	0.278593	0.164537	0.0954851	0.59957
30	Models_2_2_3_4_5	NN1ch-LGBM-3	N	Y	ABDOMINAL_CHEST_NASSAL_SPO2	6501.14	0.916473	0.70248	0.0431866	0.0442322	0.0587181	0.0709571	0.105924	0.207132	0.417047	0.517854	0.373476	0.517854
30	Models_4_2_3_4_5	NN2D	N	Y	ABDOMINAL_CHEST_NASSAL_SPO2	752.372	0.907505	0.702199	0.120338	0.275745	0.428593	0.501422	0.51215	0.531318	0.523872	0.345648	0.103145	0.531318
30	Models_2_2_4_5	NN1ch-LGBM-3	N	Y	ABDOMINAL_NASSAL_SPO2	5590.72	0.912672	0.69751	0.0431866	0.0435306	0.0573704	0.0720372	0.107088	0.2518	0.419685	0.530056	0.350787	0.530056
80	Models_3_2_6	NN1ch-LGBM-1	Y	N	ABDOMINAL_RRI	749.526	0.866308	0.697151	0.0431866	0.0561271	0.0881309	0.161979	0.246123	0.513238	0.557883	0.433451	0.190175	0.557883
30	Models_2_2_3_5_6	NN1ch-LGBM-3	Y	N	ABDOMINAL_CHEST_SPO2_RRI	6501.09	0.914174	0.696923	0.0431866	0.0435306	0.0574292	0.0713989	0.093058	0.236248	0.372694	0.55718	0.341126	0.55718
30	Models_2_2_4_5_6	NN1ch-LGBM-3	Y	Y	ABDOMINAL_NASSAL_SPO2_RRI	6459.1	0.911489	0.692998	0.0431866	0.0435306	0.0573704	0.0729543	0.107338	0.222668	0.436394	0.587284	0.321805	0.587284
30	Models_2_3_4_5	NN1ch-LGBM-3	N	Y	CHEST_NASSAL_SPO2	5561.9	0.912545	0.692781	0.0431866	0.0438746	0.0587181	0.0718585	0.130021	0.186941	0.421913	0.537517	0.483159	0.537517
80	Models_1_2	1ch	N	N	ABDOMINAL	377.938	0.859307	0.691307	0.101521	0.264098	0.429275	0.491968	0.546923	0.490372	0.340297	0.220491	0.130627	0.546923
30	Models_2_2_3_5	NN1ch-LGBM-3	N	N	ABDOMINAL_CHEST_SPO2	5564.44	0.913146	0.689613	0.0431866	0.0435306	0.0583463	0.0575534	0.106638	0.271066	0.46105	0.42445	0.320219	0.46105
80	Models_3_2	NN1ch-LGBM-1	N	N	ABDOMINAL	399.36	0.858387	0.68688	0.0431866	0.0431866	0.0463586	0.129915	0.295926	0.529476	0.512058	0.195244	0.0656812	0.529476
30	Models_3_2_3_4_5_6	NN1ch-LGBM-1	Y	Y	ABDOMINAL_CHEST_NASSAL_SPO2_RRI	6813.25	0.910611	0.686741	0.0431866	0.0431866	0.0573704	0.0729919	0.0941449	0.268783	0.446273	0.59614	0.320821	0.59614
30	Models_3_2_3_4_5	NN1ch-LGBM-1	N	Y	ABDOMINAL_CHEST_NASSAL_SPO2	6110.23	0.91008	0.685838	0.0431866	0.0435306	0.0570493	0.0602617	0.115889	0.25744	0.421257	0.546223	0.401446	0.546223
30	Models_3_2_4_5_6	NN1ch-LGBM-1	Y	Y	ABDOMINAL_NASSAL_SPO2_RRI	6045.83	0.907404	0.68577	0.0431866	0.0438746	0.0581605	0.0725276	0.138641	0.250285	0.449594	0.536364	0.423252	0.536364
80	Models_3_5_6	NN1ch-LGBM-1	Y	N	SPO2_RRI	2033.83	0.876743	0.684716	0.0435306	0.0573704	0.0832276	0.22939	0.351723	0.459864	0.642445	0.474212	0.125615	0.642445
80	Models_2_5_6	NN1ch-LGBM-3	Y	N	SPO2_RRI	2059.26	0.877563	0.682541	0.0431866	0.0438881	0.0669083	0.134219	0.338725	0.424471	0.438948	0.322305	0.099368	0.438948
30	Models_2_2_5_6	NN1ch-LGBM-3	Y	N	ABDOMINAL_SPO2_RRI	5570.89	0.908292	0.682264	0.0431866	0.0435306	0.0570717	0.0576081	0.0906745	0.284007	0.452798	0.548028	0.147757	0.548028
30	Models_3_2_3_5_6	NN1ch-LGBM-1	Y	N	ABDOMINAL_CHEST_SPO2_RRI	6094.35	0.907522	0.681623	0.0431866	0.0435306	0.0570493	0.0592387	0.100465	0.244323	0.439962	0.576915	0.543074	0.576915
30	Models_3_2_4_5	NN1ch-LGBM-1	N	Y	ABDOMINAL_NASSAL_SPO2	5105.76	0.906516	0.681482	0.0431866	0.0435306	0.0453333	0.0724656	0.136199	0.268861	0.475036	0.542073	0.240485	0.542073
30	Models_2_3_4_5_6	NN1ch-LGBM-3	Y	Y	CHEST_NASSAL_SPO2_RRI	6388.26	0.910652	0.680825	0.0431866	0.0435306	0.0574292	0.0590327	0.118907	0.210903	0.426772	0.516436	0.322794	0.516436
30	Models_2_4_5	NN1ch-LGBM-3	N	Y	NASSAL_SPO2	4518.2	0.902087	0.678023	0.0431866	0.0435306	0.0574292	0.0585512	0.0910693	0.191432	0.400215	0.558755	0.41032	0.558755
30	Models_2_2_5	NN1ch-LGBM-3	N	N	ABDOMINAL_SPO2	4548.27	0.906048	0.677689	0.0431866	0.0435306	0.0574292	0.0719012	0.0897376	0.252075	0.43434	0.495117	0.287607	0.495117
80	Models_2_5	NN1ch-LGBM-3	N	N	SPO2	1709.82	0.871333	0.676221	0.0435306	0.04426	0.057832	0.164602	0.335691	0.557254	0.515411	0.326255	0.102323	0.557254
30	Models_3_2_3_5	NN1ch-LGBM-1	N	N	ABDOMINAL_CHEST_SPO2	4986.32	0.905988	0.674825	0.0431866	0.0435306	0.0449615	0.0731437	0.123064	0.26525	0.42651	0.541205	0.37819	0.541205
30	Models_3_3_4_5_6	NN1ch-LGBM-1	Y	Y	CHEST_NASSAL_SPO2_RRI	5726.71	0.906185	0.674613	0.0431866	0.0431866	0.0445897	0.059973	0.132056	0.262808	0.4529	0.510673	0.23998	0.510673
80	Models_3_5	NN1ch-LGBM-1	N	N	SPO2	1697.38	0.873743	0.674405	0.0431866	0.0435306	0.0816777	0.238487	0.408983	0.511573	0.607158	0.33265	0.108452	0.607158
30	Models_3_2_5_6	NN1ch-LGBM-1	Y	N	ABDOMINAL_SPO2_RRI	5139.89	0.90175	0.672057	0.0431866	0.0435306	0.0566775	0.0719472	0.127411	0.286028	0.457524	0.49778	0.439958	0.49778
30	Models_4_2_4_5	NN2D	N	Y	ABDOMINAL_NASSAL_SPO2	760.192	0.887355	0.670407	0.0857912	0.303961	0.317356	0.457016	0.544661	0.592304	0.475721	0.271237	0.0773306	0.592304
30	Models_2_3_5_6	NN1ch-LGBM-3	Y	N	CHEST_SPO2_RRI	5240.49	0.905704	0.66888	0.0431866	0.0435306	0.0442322	0.0725825	0.0991043	0.220177	0.377074	0.503297	0.450577	0.503297
30	Models_2_4_5_6	NN1ch-LGBM-3	Y	Y	NASSAL_SPO2_RRI	5244.29	0.901171	0.668429	0.0431866	0.0431866	0.0579888	0.0596919	0.109814	0.19664	0.453382	0.6161	0.0823006	0.6161
30	Models_3_3_4_5	NN1ch-LGBM-1	N	Y	CHEST_NASSAL_SPO2	5102.15	0.903437	0.668192	0.0431866	0.0431866	0.0453485	0.0609755	0.146687	0.268623	0.433516	0.512102	0.317581	0.512102
30	Models_4_2_5	NN2D	N	N	ABDOMINAL_SPO2	750.591	0.891563	0.666696	0.160048	0.336812	0.41983	0.493342	0.565662	0.543032	0.456447	0.244659	0.077413	0.565662
30	Models_3_2_5	NN1ch-LGBM-1	N	N	ABDOMINAL_SPO2	4389.36	0.900331	0.666685	0.0431866	0.0438746	0.0457203	0.071423	0.131634	0.310732	0.438937	0.525646	0.255357	0.525646
80	Models_2_4	NN1ch-LGBM-3	N	Y	NASSAL	391.111	0.843906	0.664037	0.0431866	0.0431866	0.0913909	0.16279	0.32875	0.429501	0.557887	0.359688	0.118426	0.557887
80	Models_1_7	1ch	N	N	SPO2 + 10	366.306	0.86734	0.663631	0.126182	0.416835	0.637332	0.620843	0.50122	0.283635	0.151985	0.107871	0.0642043	0.637332
80	Models_2_4_6	NN1ch-LGBM-3	Y	Y	NASSAL_RRI	726.013	0.850199	0.659876	0.0431866	0.0572872	0.0583239	0.171767	0.269517	0.423529	0.551502	0.402845	0.101066	0.551502
80	Models_3_4_6	NN1ch-LGBM-1	Y	Y	NASSAL_RRI	741.373	0.849861	0.65981	0.0431866	0.0435306	0.0570232	0.147296	0.296644	0.546786	0.425195	0.2712	0.127417	0.546786
80	Models_2_3	NN1ch-LGBM-3	N	N	CHEST	390.84	0.857002	0.659149	0.0431866	0.0567276	0.0782641	0.106866	0.209188	0.340344	0.464853	0.459951	0.0733573	0.464853
30	Models_2_3_5	NN1ch-LGBM-3	N	N	CHEST_SPO2	4611.69	0.903165	0.659043	0.0431866	0.0435306	0.0442322	0.0725825	0.112628	0.213027	0.409192	0.531948	0.402386	0.531948
30	Models_3_4_5_6	NN1ch-LGBM-1	Y	Y	NASSAL_SPO2_RRI	5071.16	0.894643	0.653705	0.0431866	0.0431866	0.0454997	0.0733253	0.215683	0.242263	0.423475	0.559924	0.22289	0.559924
80	Models_4_2_3	NN2D	N	N	ABDOMINAL_CHEST	308.566	0.845	0.653586	0.113966	0.406965	0.43242	0.349725	0.35522	0.359556	0.279639	0.169583	0.0996132	0.43242
80	Models_1_4	1ch	N	Y	NASSAL	373.86	0.833617	0.653518	0.206115	0.436514	0.547662	0.478477	0.359861	0.28634	0.219633	0.10485	0.0672826	0.547662
30	Models_3_4_5	NN1ch-LGBM-1	N	Y	NASSAL_SPO2	4366.86	0.892698	0.652945	0.0431866	0.0431866	0.0457516	0.0843156	0.213245	0.275426	0.454004	0.537822	0.346252	0.537822
30	Models_3_3_5_6	NN1ch-LGBM-1	Y	N	CHEST_SPO2_RRI	5047.91	0.898485	0.652468	0.0431866	0.0431866	0.044604	0.0585808	0.117809	0.22925	0.416866	0.501195	0.359214	0.501195
30	Models_4_3_4_5	NN2D	N	Y	CHEST_NASSAL_SPO2	761.023	0.883555	0.652339	0.0783389	0.291468	0.528503	0.500648	0.504006	0.50139	0.408068	0.255603	0.084053	0.528503
80	Models_1_8	1ch	N	N	SPO2 + 15	369.518	0.855845	0.651946	0.188655	0.485925	0.528428	0.47872	0.441415	0.333463	0.222647	0.129318	0.0677016	0.528428
30	Models_3_3_5	NN1ch-LGBM-1	N	N	CHEST_SPO2	4452.86	0.895783	0.649479	0.0431866	0.0431866	0.044604	0.0464806	0.12181	0.250709	0.426765	0.523416	0.356596	0.523416
80	Models_3_4	NN1ch-LGBM-1	N	Y	NASSAL	402.965	0.836822	0.643336	0.0431866	0.0431866	0.0564487	0.101281	0.420067	0.541565	0.390205	0.320733	0.170244	0.541565
80	Models_2_3_6	NN1ch-LGBM-3	Y	N	CHEST_RRI	753.985	0.855277	0.642839	0.0431866	0.0572872	0.0898291	0.138417	0.214186	0.317183	0.413328	0.436302	0.0789167	0.436302
30	Models_4_2_3_5	NN2D	N	N	ABDOMINAL_CHEST_SPO2	747.296	0.879808	0.639292	0.212787	0.365785	0.418596	0.48078	0.48138	0.40305	0.327134	0.191134	0.0718109	0.48138
30	Models_4_4_5	NN2D	N	Y	NASSAL_SPO2	762.92	0.872432	0.638307	0.262715	0.41312	0.476676	0.516941	0.495547	0.384643	0.253522	0.100199	0.0662714	0.516941
80	Models_3_3_6	NN1ch-LGBM-1	Y	N	CHEST_RRI	747.697	0.841796	0.635742	0.0431866	0.0833935	0.100432	0.119022	0.207674	0.356686	0.489478	0.482019	0.167856	0.489478
30	Models_2_2_3_4_6	NN1ch-LGBM-3	Y	Y	ABDOMINAL_CHEST_NASSAL_RRI	3339.72	0.8862	0.635319	0.0431866	0.0435306	0.0576447	0.0586457	0.0573766	0.176976	0.316379	0.568741	0.155677	0.568741
30	Models_4_2_4	NN2D	N	Y	ABDOMINAL_NASSAL	733.788	0.869503	0.629812	0.0725231	0.200126	0.342183	0.422027	0.572722	0.507548	0.355492	0.219855	0.142401	0.572722
80	Models_1_3	1ch	N	N	CHEST	370.996	0.838156	0.626438	0.0846284	0.219652	0.321623	0.505364	0.482414	0.285853	0.215575	0.11399	0.0682585	0.505364
30	Models_2_2_3_4	NN1ch-LGBM-3	N	Y	ABDOMINAL_CHEST_NASSAL	2489.82	0.883667	0.626181	0.0431866	0.0435306	0.0576447	0.0699456	0.0479924	0.156633	0.287997	0.484371	0.262803	0.484371
30	Models_4_3_5	NN2D	N	N	CHEST_SPO2	746.446	0.890112	0.620984	0.0608929	0.19724	0.368178	0.495179	0.551136	0.510163	0.471137	0.275861	0.101676	0.551136
30	Models_3_2_3_4_6	NN1ch-LGBM-1	Y	Y	ABDOMINAL_CHEST_NASSAL_RRI	3200.9	0.87746	0.620587	0.0431866	0.0431866	0.0438881	0.0585598	0.0602999	0.226873	0.355288	0.512563	0.207684	0.512563
80	Models_1_9	1ch	N	N	SPO2 + 20	375.49	0.835412	0.618197	0.282872	0.435825	0.451218	0.445591	0.333231	0.233983	0.16607	0.103539	0.0784894	0.451218
30	Models_4_2_3	NN2D	N	N	ABDOMINAL_CHEST	735.096	0.873703	0.617994	0.0452481	0.170837	0.285342	0.433576	0.466814	0.428872	0.302244	0.215971	0.120382	0.466814
80	Models_3_3	NN1ch-LGBM-1	N	N	CHEST	405.311	0.838081	0.617101	0.0431866	0.0433378	0.0831562	0.135979	0.220097	0.377758	0.494343	0.392067	0.109728	0.494343
30	Models_2_2_4	NN1ch-LGBM-3	N	Y	ABDOMINAL_NASSAL	1563.73	0.875703	0.615046	0.0431866	0.0431866	0.056641	0.0588693	0.0628236	0.179705	0.386294	0.467294	0.124963	0.467294
80	Models_1_5	1ch	N	N	SPO2	365.547	0.836009	0.613128	0.246828	0.374264	0.482275	0.389856	0.3226	0.280385	0.15753	0.0921415	0.0649337	0.482275
30	Models_2_3_4_6	NN1ch-LGBM-3	Y	Y	CHEST_NASSAL_RRI	2332.13	0.879724	0.613083	0.0431866	0.0435306	0.0576447	0.05814	0.07242	0.152715	0.288134	0.470282	0.22534	0.470282
30	Models_3_2_3_4	NN1ch-LGBM-1	N	Y	ABDOMINAL_CHEST_NASSAL	2234.86	0.874984	0.61284	0.0431866	0.0431866	0.0438881	0.0581728	0.0747533	0.208215	0.353461	0.51393	0.225406	0.51393
30	Models_3_5_6	NN1ch-LGBM-1	Y	N	SPO2_RRI	4417.76	0.876901	0.610262	0.0431866	0.0431866	0.044604	0.0711056	0.169637	0.223845	0.391386	0.53117	0.29178	0.53117
30	Models_2_2_4_6	NN1ch-LGBM-3	Y	Y	ABDOMINAL_NASSAL_RRI	2491.83	0.875054	0.608728	0.0431866	0.0431866	0.056641	0.0462244	0.071387	0.161615	0.33343	0.553845	0.23371	0.553845
30	Models_2_5	NN1ch-LGBM-3	N	N	SPO2	3793.05	0.875267	0.605499	0.0431866	0.0431866	0.0431866	0.0458061	0.111481	0.303627	0.414999	0.391384	0.06999	0.414999
30	Models_2_3_4	NN1ch-LGBM-3	N	Y	CHEST_NASSAL	1607.02	0.872773	0.605255	0.0431866	0.0431866	0.0435306	0.0579888	0.0734161	0.1716	0.371408	0.535725	0.100871	0.535725
30	Models_4_3_4	NN2D	N	Y	CHEST_NASSAL	732.392	0.858085	0.603713	0.0866756	0.162134	0.25963	0.36742	0.474578	0.473047	0.422743	0.230418	0.131701	0.474578
30	Models_2_5_6	NN1ch-LGBM-3	Y	N	SPO2_RRI	4492.43	0.877243	0.603324	0.0431866	0.0431866	0.0435306	0.0595508	0.124479	0.264301	0.43393	0.532234	0.194341	0.532234
30	Models_4_2_3_4	NN2D	N	Y	ABDOMINAL_CHEST_NASSAL	731.761	0.858279	0.599995	0.0817581	0.122324	0.238438	0.381747	0.482641	0.43336	0.264279	0.171489	0.112772	0.482641
30	Models_3_5	NN1ch-LGBM-1	N	N	SPO2	3707.51	0.873266	0.598842	0.0431866	0.0431866	0.044991	0.0492949	0.173761	0.290384	0.407329	0.5561	0.223232	0.5561
80	Models_1_10	1ch	N	N	SPO2 + 25	372.692	0.822599	0.596697	0.147538	0.368471	0.447261	0.453212	0.407677	0.349738	0.216715	0.155391	0.0920612	0.453212
30	Models_3_2_4_6	NN1ch-LGBM-1	Y	Y	ABDOMINAL_NASSAL_RRI	2312.88	0.863141	0.596222	0.0431866	0.0431866	0.0435306	0.0572433	0.109854	0.249908	0.413374	0.499235	0.286498	0.499235
80	Models_4_3_5	NN2D	N	N	CHEST_SPO2	327.618	0.779301	0.594098	0.102393	0.271268	0.50398	0.444224	0.430239	0.389687	0.294574	0.18473	0.0973529	0.50398
10	Models_2_2_3_4_5_6	NN1ch-LGBM-3	Y	Y	ABDOMINAL_CHEST_NASSAL_SPO2_RRI	19969.9	0.898948	0.592816	0.0431866	0.0431866	0.0431866	0.0438746	0.0579888	0.0579737	0.139827	0.41692	0.55472	0.55472
30	Models_3_2_4	NN1ch-LGBM-1	N	Y	ABDOMINAL_NASSAL	1643.38	0.859517	0.592609	0.0431866	0.0431866	0.0435306	0.0685902	0.119472	0.240935	0.416042	0.489131	0.196954	0.489131
30	Models_2_2_3	NN1ch-LGBM-3	N	N	ABDOMINAL_CHEST	1569.26	0.865836	0.588715	0.0431866	0.0431866	0.0435306	0.0695738	0.0866588	0.121275	0.338344	0.45481	0.114046	0.45481
30	Models_3_2_3	NN1ch-LGBM-1	N	N	ABDOMINAL_CHEST	1588.56	0.860923	0.58818	0.0431866	0.0431866	0.0435306	0.0581728	0.0834678	0.185209	0.312298	0.522485	0.212216	0.522485
10	Models_2_2_3_4_5	NN1ch-LGBM-3	N	Y	ABDOMINAL_CHEST_NASSAL_SPO2	19314.6	0.897337	0.587196	0.0431866	0.0431866	0.0431866	0.0438746	0.0438746	0.058326	0.162674	0.405536	0.561675	0.561675
30	Models_2_2_3_6	NN1ch-LGBM-3	Y	N	ABDOMINAL_CHEST_RRI	2492.35	0.867976	0.587124	0.0431866	0.0435306	0.0576447	0.068188	0.0577284	0.144716	0.264567	0.447209	0.219538	0.447209
30	Models_3_2_3_6	NN1ch-LGBM-1	Y	N	ABDOMINAL_CHEST_RRI	2266.05	0.861841	0.587106	0.0431866	0.0431866	0.0438881	0.0573704	0.0691475	0.210544	0.321173	0.498734	0.322911	0.498734
30	Models_3_3_4	NN1ch-LGBM-1	N	Y	CHEST_NASSAL	1588.5	0.858409	0.584042	0.0431866	0.0431866	0.0435306	0.0574435	0.0747739	0.201136	0.405496	0.466581	0.25433	0.466581
30	Models_3_3_4_6	NN1ch-LGBM-1	Y	Y	CHEST_NASSAL_RRI	2352.38	0.860159	0.580311	0.0431866	0.0431866	0.0435306	0.0574435	0.0849949	0.191473	0.359844	0.466245	0.278758	0.466245
10	Models_2_2_4_5_6	NN1ch-LGBM-3	Y	Y	ABDOMINAL_NASSAL_SPO2_RRI	19304.7	0.889936	0.578082	0.0431866	0.0431866	0.0431866	0.0435306	0.0442322	0.0852002	0.239688	0.462813	0.417331	0.462813
10	Models_2_3_4_5_6	NN1ch-LGBM-3	Y	Y	CHEST_NASSAL_SPO2_RRI	18960.9	0.892301	0.575085	0.0431866	0.0431866	0.0431866	0.0431866	0.0579888	0.0594197	0.139162	0.391995	0.527018	0.527018
30	Models_2_2	NN1ch-LGBM-3	N	N	ABDOMINAL	824.287	0.846443	0.569444	0.0431866	0.0431866	0.0567276	0.0575947	0.0741737	0.158595	0.350918	0.541358	0.174362	0.541358
10	Models_2_3_4_5	NN1ch-LGBM-3	N	Y	CHEST_NASSAL_SPO2	14822.6	0.889861	0.567439	0.0431866	0.0431866	0.0431866	0.0435306	0.0579888	0.0738557	0.150523	0.423827	0.550632	0.550632
10	Models_2_2_4_5	NN1ch-LGBM-3	N	Y	ABDOMINAL_NASSAL_SPO2	15806.7	0.886114	0.566654	0.0431866	0.0431866	0.0431866	0.0435306	0.0442322	0.0711713	0.225754	0.42793	0.418008	0.42793
10	Models_2_2_3_5_6	NN1ch-LGBM-3	Y	N	ABDOMINAL_CHEST_SPO2_RRI	18304.8	0.888991	0.562609	0.0431866	0.0431866	0.0435306	0.0435306	0.0442322	0.0815282	0.173042	0.388958	0.403993	0.403993
30	Models_2_2_6	NN1ch-LGBM-3	Y	N	ABDOMINAL_RRI	1605.28	0.851507	0.561482	0.0431866	0.0431866	0.0572872	0.0564711	0.0963483	0.150131	0.316334	0.505869	0.140643	0.505869
10	Models_2_2_3_5	NN1ch-LGBM-3	N	N	ABDOMINAL_CHEST_SPO2	15666.6	0.888014	0.561233	0.0431866	0.0431866	0.0435306	0.0438746	0.0442322	0.0581547	0.210394	0.365512	0.488352	0.488352
10	Models_2_2_5_6	NN1ch-LGBM-3	Y	N	ABDOMINAL_SPO2_RRI	14934.8	0.881051	0.556195	0.0431866	0.0431866	0.0431866	0.0435306	0.0442322	0.061396	0.224392	0.368253	0.514678	0.514678
10	Models_2_2_5	NN1ch-LGBM-3	N	N	ABDOMINAL_SPO2	13795.3	0.880415	0.555753	0.0431866	0.0431866	0.0435306	0.0435306	0.044991	0.0693123	0.186363	0.400913	0.528313	0.528313
30	Models_1_10	1ch	N	N	SPO2 + 25	725.202	0.847034	0.554955	0.0720949	0.277324	0.449441	0.514127	0.332301	0.274992	0.198626	0.117967	0.0638603	0.514127
10	Models_2_4_5_6	NN1ch-LGBM-3	Y	Y	NASSAL_SPO2_RRI	14679.5	0.876512	0.551145	0.0431866	0.0431866	0.0431866	0.0431866	0.0576313	0.0705672	0.149867	0.418918	0.488079	0.488079
10	Models_2_4_5	NN1ch-LGBM-3	N	Y	NASSAL_SPO2	13217.2	0.875454	0.549279	0.0431866	0.0431866	0.0431866	0.0431866	0.0438746	0.0601726	0.17052	0.454964	0.445035	0.454964
30	Models_1_7	1ch	N	N	SPO2 + 10	720.9	0.840973	0.544844	0.0715448	0.214144	0.350907	0.483009	0.504922	0.424101	0.309576	0.0967223	0.0642043	0.504922
10	Models_3_2_3_4_5_6	NN1ch-LGBM-1	Y	Y	ABDOMINAL_CHEST_NASSAL_SPO2_RRI	20338	0.882558	0.543239	0.0431866	0.0431866	0.0431866	0.044604	0.0718812	0.123221	0.211785	0.424892	0.460842	0.460842
30	Models_2_4_6	NN1ch-LGBM-3	Y	Y	NASSAL_RRI	1575.29	0.836105	0.542569	0.0431866	0.0431866	0.0435306	0.0702642	0.0907886	0.172212	0.415607	0.512059	0.114047	0.512059
30	Models_2_4	NN1ch-LGBM-3	N	Y	NASSAL	851.984	0.82915	0.539296	0.0431866	0.0431866	0.0435306	0.0445897	0.0750325	0.208972	0.400149	0.522173	0.0902629	0.522173
10	Models_3_2_3_4_5	NN1ch-LGBM-1	N	Y	ABDOMINAL_CHEST_NASSAL_SPO2	17974	0.880548	0.539026	0.0431866	0.0431866	0.0431866	0.0447552	0.0711731	0.136041	0.271331	0.401592	0.493737	0.493737
10	Models_3_2_4_5_6	NN1ch-LGBM-1	Y	Y	ABDOMINAL_NASSAL_SPO2_RRI	17478.9	0.874407	0.536178	0.0431866	0.0431866	0.0431866	0.0442322	0.071965	0.124178	0.244841	0.4243	0.420123	0.4243
30	Models_1_2	1ch	N	N	ABDOMINAL	723.048	0.830947	0.535783	0.0691105	0.124854	0.37753	0.477602	0.45516	0.266453	0.19444	0.121909	0.0663738	0.477602
10	Models_2_3_5_6	NN1ch-LGBM-3	Y	N	CHEST_SPO2_RRI	14601.6	0.878314	0.535425	0.0431866	0.0431866	0.0431866	0.0435306	0.0442322	0.0863037	0.194197	0.422663	0.326946	0.422663
10	Models_3_2_4_5	NN1ch-LGBM-1	N	Y	ABDOMINAL_NASSAL_SPO2	14288.4	0.872631	0.533242	0.0431866	0.0431866	0.0431866	0.0442322	0.057904	0.11021	0.287203	0.428171	0.461043	0.461043
10	Models_4_2_3_4_5	NN2D	N	Y	ABDOMINAL_CHEST_NASSAL_SPO2	2059.49	0.859105	0.532477	0.044604	0.0863199	0.191564	0.316059	0.379006	0.405986	0.527793	0.374836	0.108074	0.527793
10	Models_2_3_5	NN1ch-LGBM-3	N	N	CHEST_SPO2	13799.2	0.877631	0.531606	0.0431866	0.0431866	0.0431866	0.0435306	0.0442322	0.0719572	0.142051	0.384935	0.464598	0.464598
30	Models_3_2_6	NN1ch-LGBM-1	Y	N	ABDOMINAL_RRI	1573.94	0.834272	0.531577	0.0431866	0.0431866	0.0435306	0.0698888	0.10522	0.178153	0.385985	0.536289	0.142713	0.536289
30	Models_1_8	1ch	N	N	SPO2 + 15	730.948	0.830755	0.529651	0.0453941	0.193331	0.37145	0.518984	0.453617	0.325481	0.226592	0.105728	0.064478	0.518984
30	Models_3_2	NN1ch-LGBM-1	N	N	ABDOMINAL	880.81	0.830399	0.527709	0.0431866	0.0431866	0.0435306	0.0691105	0.134207	0.178692	0.438965	0.462922	0.150723	0.462922
10	Models_4_3_4_5	NN2D	N	Y	CHEST_NASSAL_SPO2	2087.56	0.863977	0.524847	0.0442322	0.137709	0.287057	0.43709	0.434762	0.519783	0.385903	0.19077	0.0788475	0.519783
10	Models_3_2_3_5_6	NN1ch-LGBM-1	Y	N	ABDOMINAL_CHEST_SPO2_RRI	17471.2	0.872564	0.520757	0.0431866	0.0431866	0.0431866	0.0443833	0.0721231	0.099057	0.219891	0.442486	0.398053	0.442486
10	Models_3_3_4_5_6	NN1ch-LGBM-1	Y	Y	CHEST_NASSAL_SPO2_RRI	16795.5	0.873236	0.520416	0.0431866	0.0431866	0.0431866	0.0433378	0.0724152	0.112854	0.220626	0.43492	0.428036	0.43492
30	Models_1_5	1ch	N	N	SPO2	720.868	0.815894	0.520036	0.0716559	0.118264	0.333806	0.496789	0.605993	0.372655	0.196053	0.084151	0.0638603	0.605993
10	Models_3_2_3_5	NN1ch-LGBM-1	N	N	ABDOMINAL_CHEST_SPO2	14231.3	0.871189	0.518424	0.0431866	0.0431866	0.0431866	0.0447552	0.0713206	0.0887782	0.224697	0.370045	0.460545	0.460545
10	Models_3_3_4_5	NN1ch-LGBM-1	N	Y	CHEST_NASSAL_SPO2	14082.1	0.873047	0.517224	0.0431866	0.0431866	0.0431866	0.0440258	0.059441	0.124675	0.223826	0.425323	0.432778	0.432778
30	Models_2_3	NN1ch-LGBM-3	N	N	CHEST	852.096	0.833549	0.51686	0.0431866	0.0431866	0.0435306	0.0435306	0.094403	0.108301	0.271502	0.336689	0.0644423	0.336689
30	Models_3_4_6	NN1ch-LGBM-1	Y	Y	NASSAL_RRI	1632.74	0.811809	0.516827	0.0431866	0.0431866	0.0431866	0.0433378	0.116052	0.27515	0.373563	0.433748	0.176386	0.433748
30	Models_2_3_6	NN1ch-LGBM-3	Y	N	CHEST_RRI	1582.32	0.832536	0.504753	0.0431866	0.0431866	0.0435306	0.0425141	0.0684339	0.142538	0.21244	0.425671	0.142654	0.425671
10	Models_3_4_5_6	NN1ch-LGBM-1	Y	Y	NASSAL_SPO2_RRI	14591.8	0.860631	0.504638	0.0431866	0.0431866	0.0431866	0.0435306	0.0726854	0.0997524	0.243825	0.48102	0.390845	0.48102
30	Models_1_4	1ch	N	Y	NASSAL	727.096	0.794568	0.50385	0.0453485	0.165074	0.323152	0.357139	0.435024	0.388641	0.342391	0.213457	0.104768	0.435024
10	Models_3_4_5	NN1ch-LGBM-1	N	Y	NASSAL_SPO2	12684	0.858586	0.502535	0.0431866	0.0431866	0.0431866	0.0435306	0.0449615	0.0885597	0.28954	0.469005	0.420005	0.469005
30	Models_1_9	1ch	N	N	SPO2 + 20	721.09	0.819897	0.500486	0.0993225	0.287488	0.451444	0.468365	0.405359	0.386885	0.220131	0.0850222	0.0638603	0.468365
10	Models_3_2_5_6	NN1ch-LGBM-1	Y	N	ABDOMINAL_SPO2_RRI	14127.2	0.857905	0.497876	0.0431866	0.0431866	0.0431866	0.0442322	0.0728821	0.100272	0.271713	0.447299	0.411752	0.447299
30	Models_1_3	1ch	N	N	CHEST	719.073	0.808401	0.493963	0.0833576	0.106365	0.363057	0.402757	0.306422	0.203165	0.116373	0.0680456	0.0638603	0.402757
10	Models_4_2_4_5	NN2D	N	Y	ABDOMINAL_NASSAL_SPO2	2084.9	0.840253	0.492178	0.0583109	0.111077	0.309129	0.389667	0.428791	0.460451	0.430542	0.309231	0.177859	0.460451
30	Models_3_4	NN1ch-LGBM-1	N	Y	NASSAL	894.147	0.79572	0.492063	0.0431866	0.0431866	0.0431866	0.0436818	0.15544	0.360153	0.296213	0.171227	0.0644187	0.360153
10	Models_3_2_5	NN1ch-LGBM-1	N	N	ABDOMINAL_SPO2	12679	0.854783	0.490652	0.0431866	0.0431866	0.0431866	0.0442322	0.0579817	0.101843	0.29834	0.466019	0.365728	0.466019
30	Models_3_3_6	NN1ch-LGBM-1	Y	N	CHEST_RRI	1636.36	0.817506	0.489924	0.0431866	0.0431866	0.0431866	0.0435306	0.0699456	0.187709	0.345567	0.265593	0.0638603	0.345567
10	Models_4_3_5	NN2D	N	N	CHEST_SPO2	2124.63	0.851099	0.488835	0.0443833	0.139722	0.309665	0.430098	0.515381	0.40129	0.372353	0.167913	0.0710633	0.515381
30	Models_3_3	NN1ch-LGBM-1	N	N	CHEST	887.66	0.812995	0.487482	0.0431866	0.0431866	0.0431866	0.0435306	0.070103	0.107884	0.341769	0.32083	0.111164	0.341769
10	Models_2_5	NN1ch-LGBM-3	N	N	SPO2	11231.2	0.849776	0.486743	0.0431866	0.0431866	0.0431866	0.0431866	0.0435306	0.0476779	0.190808	0.424153	0.376826	0.424153
10	Models_3_3_5_6	NN1ch-LGBM-1	Y	N	CHEST_SPO2_RRI	14205.8	0.859058	0.486291	0.0431866	0.0431866	0.0431866	0.0433378	0.0594116	0.0790211	0.276396	0.420462	0.397843	0.420462
10	Models_2_5_6	NN1ch-LGBM-3	Y	N	SPO2_RRI	12633.6	0.846085	0.483731	0.0431866	0.0431866	0.0431866	0.0431866	0.0438881	0.0697208	0.251621	0.497886	0.368671	0.497886
10	Models_3_3_5	NN1ch-LGBM-1	N	N	CHEST_SPO2	12663.7	0.858271	0.482716	0.0431866	0.0431866	0.0431866	0.0433378	0.0586822	0.0999417	0.230322	0.430021	0.299967	0.430021
10	Models_2_2_3_4_6	NN1ch-LGBM-3	Y	Y	ABDOMINAL_CHEST_NASSAL_RRI	9697.74	0.846199	0.464256	0.0431866	0.0431866	0.0431866	0.0435306	0.0435306	0.0577521	0.166305	0.294244	0.239138	0.294244
10	Models_2_2_3_4	NN1ch-LGBM-3	N	Y	ABDOMINAL_CHEST_NASSAL	7049.95	0.840976	0.460532	0.0431866	0.0431866	0.0431866	0.0435306	0.0435306	0.0570317	0.155167	0.33277	0.269744	0.33277
10	Models_4_2_3_5	NN2D	N	N	ABDOMINAL_CHEST_SPO2	2073.82	0.850372	0.459754	0.044991	0.0789826	0.188012	0.28954	0.454076	0.434254	0.38125	0.252387	0.154455	0.454076
10	Models_4_2_5	NN2D	N	N	ABDOMINAL_SPO2	2134.61	0.817994	0.454497	0.0719043	0.12415	0.266917	0.41354	0.41597	0.430049	0.377974	0.151435	0.106127	0.430049
10	Models_3_5_6	NN1ch-LGBM-1	Y	N	SPO2_RRI	12452.2	0.835437	0.450566	0.0431866	0.0431866	0.0431866	0.0431866	0.0574292	0.0773904	0.308617	0.453972	0.321862	0.453972
10	Models_4_4_5	NN2D	N	Y	NASSAL_SPO2	2113.81	0.818378	0.445664	0.07483	0.241426	0.298089	0.337137	0.440084	0.444326	0.403254	0.16406	0.0647627	0.444326
10	Models_2_2_4_6	NN1ch-LGBM-3	Y	Y	ABDOMINAL_NASSAL_RRI	6891.47	0.832285	0.440151	0.0431866	0.0431866	0.0431866	0.0431866	0.0435306	0.0706224	0.200836	0.395649	0.103851	0.395649
10	Models_3_5	NN1ch-LGBM-1	N	N	SPO2	10859.4	0.831203	0.438001	0.0431866	0.0431866	0.0431866	0.0431866	0.0438746	0.103674	0.321289	0.45709	0.306437	0.45709
10	Models_2_2_4	NN1ch-LGBM-3	N	Y	ABDOMINAL_NASSAL	4899.6	0.826775	0.435819	0.0431866	0.0431866	0.0431866	0.0431866	0.0435306	0.0702648	0.201604	0.389965	0.128154	0.389965
10	Models_2_3_4_6	NN1ch-LGBM-3	Y	Y	CHEST_NASSAL_RRI	6424.66	0.83078	0.419286	0.0431866	0.0431866	0.0431866	0.0431866	0.0435306	0.0582974	0.180854	0.370404	0.0783709	0.370404
10	Models_2_3_4	NN1ch-LGBM-3	N	Y	CHEST_NASSAL	4935.88	0.824623	0.415853	0.0431866	0.0431866	0.0431866	0.0431866	0.0567276	0.0449126	0.182238	0.376723	0.105133	0.376723
10	Models_3_2_3_4_6	NN1ch-LGBM-1	Y	Y	ABDOMINAL_CHEST_NASSAL_RRI	9376.52	0.821543	0.411012	0.0431866	0.0431866	0.0431866	0.0431866	0.071779	0.0994437	0.244102	0.350608	0.302596	0.350608
10	Models_2_2_3	NN1ch-LGBM-3	N	N	ABDOMINAL_CHEST	4868.48	0.815539	0.406731	0.0431866	0.0431866	0.0431866	0.0431866	0.0435306	0.0583392	0.181704	0.349111	0.201765	0.349111
10	Models_3_2_3_4	NN1ch-LGBM-1	N	Y	ABDOMINAL_CHEST_NASSAL	6517.21	0.812201	0.405745	0.0431866	0.0431866	0.0431866	0.0431866	0.0444111	0.100491	0.214192	0.355313	0.253049	0.355313
10	Models_4_2_3_4	NN2D	N	Y	ABDOMINAL_CHEST_NASSAL	2032.35	0.801794	0.404859	0.0438881	0.110698	0.262783	0.454922	0.462689	0.359124	0.150658	0.0911949	0.0638603	0.462689
10	Models_2_2_3_6	NN1ch-LGBM-3	Y	N	ABDOMINAL_CHEST_RRI	6912.13	0.813528	0.394347	0.0431866	0.0431866	0.0431866	0.0431866	0.0435306	0.0437564	0.199995	0.359916	0.116935	0.359916
10	Models_3_2_4_6	NN1ch-LGBM-1	Y	Y	ABDOMINAL_NASSAL_RRI	6211.94	0.799305	0.389765	0.0431866	0.0431866	0.0431866	0.0431866	0.0576376	0.0717617	0.275541	0.35229	0.274693	0.35229
10	Models_4_3_4	NN2D	N	Y	CHEST_NASSAL	2080.49	0.796573	0.381307	0.0714456	0.0672847	0.195733	0.309488	0.374198	0.335963	0.268027	0.185988	0.0786806	0.374198
10	Models_3_2_4	NN1ch-LGBM-1	N	Y	ABDOMINAL_NASSAL	4598.79	0.788698	0.378535	0.0431866	0.0431866	0.0431866	0.0431866	0.0447981	0.203041	0.203729	0.244844	0.194863	0.244844
10	Models_3_2_3_6	NN1ch-LGBM-1	Y	N	ABDOMINAL_CHEST_RRI	6294.2	0.792319	0.360951	0.0431866	0.0431866	0.0431866	0.0431866	0.04426	0.0971386	0.196739	0.352823	0.117325	0.352823
10	Models_2_2	NN1ch-LGBM-3	N	N	ABDOMINAL	2596.6	0.779366	0.356848	0.0431866	0.0431866	0.0431866	0.0431866	0.0576313	0.0730645	0.160547	0.448546	0.0781576	0.448546
10	Models_4_2_4	NN2D	N	Y	ABDOMINAL_NASSAL	2078.28	0.781186	0.354167	0.0438881	0.142805	0.339274	0.373238	0.316335	0.315752	0.23303	0.202123	0.0933601	0.373238
10	Models_2_2_6	NN1ch-LGBM-3	Y	N	ABDOMINAL_RRI	4888.13	0.788868	0.352801	0.0431866	0.0431866	0.0431866	0.0431866	0.0431866	0.0688792	0.193255	0.314445	0.10757	0.314445
10	Models_4_2_3	NN2D	N	N	ABDOMINAL_CHEST	2082.46	0.788626	0.349935	0.0435306	0.119502	0.184802	0.393067	0.362208	0.29754	0.161909	0.117069	0.0656722	0.393067
10	Models_3_3_4_6	NN1ch-LGBM-1	Y	Y	CHEST_NASSAL_RRI	6261.13	0.785895	0.348044	0.0431866	0.0431866	0.0431866	0.0431866	0.0581807	0.145144	0.244678	0.249808	0.195071	0.249808
10	Models_2_4_6	NN1ch-LGBM-3	Y	Y	NASSAL_RRI	4603.56	0.784612	0.346075	0.0431866	0.0431866	0.0431866	0.0431866	0.0438746	0.0623628	0.276057	0.208143	0.0638603	0.276057
10	Models_3_2_3	NN1ch-LGBM-1	N	N	ABDOMINAL_CHEST	4658.97	0.782037	0.345621	0.0431866	0.0431866	0.0431866	0.0431866	0.0438881	0.0856446	0.197442	0.320904	0.0645618	0.320904
10	Models_1_9	1ch	N	N	SPO2 + 20	2190.57	0.756871	0.343911	0.0435306	0.174056	0.408576	0.521338	0.394115	0.348591	0.176093	0.0838857	0.0638603	0.521338
10	Models_3_3_4	NN1ch-LGBM-1	N	Y	CHEST_NASSAL	4604.71	0.773133	0.341367	0.0431866	0.0431866	0.0431866	0.0431866	0.0436818	0.0983655	0.228927	0.371387	0.137912	0.371387
10	Models_1_10	1ch	N	N	SPO2 + 25	2198.99	0.764828	0.340055	0.0591055	0.307922	0.455842	0.389475	0.242121	0.164435	0.0776203	0.0642043	0.0638603	0.455842
10	Models_2_4	NN1ch-LGBM-3	N	Y	NASSAL	2573.88	0.76021	0.337442	0.0431866	0.0431866	0.0431866	0.0431866	0.057474	0.0782119	0.273724	0.353899	0.0638603	0.353899
80	Models_2_6	NN1ch-LGBM-3	Y	N	RRI	390.09	0.66347	0.32597	0.0431866	0.041826	0.0559267	0.0807541	0.133884	0.222574	0.223247	0.0638603	0.0638603	0.223247
80	Models_1_6	1ch	Y	N	RRI	373.485	0.648261	0.322245	0.0687778	0.177587	0.206191	0.302058	0.189826	0.113389	0.100166	0.0642043	0.0638603	0.302058
10	Models_1_8	1ch	N	N	SPO2 + 15	2160.96	0.734349	0.318095	0.0431866	0.044991	0.386879	0.559878	0.406094	0.352466	0.137113	0.0920203	0.0642043	0.559878
80	Models_3_6	NN1ch-LGBM-1	Y	N	RRI	404.935	0.646332	0.315665	0.0431866	0.041826	0.0421701	0.0550632	0.147425	0.21551	0.232652	0.0638603	0.0638603	0.232652
10	Models_3_4_6	NN1ch-LGBM-1	Y	Y	NASSAL_RRI	4633.31	0.73516	0.31113	0.0431866	0.0431866	0.0431866	0.0431866	0.0581677	0.154263	0.224693	0.407182	0.0638603	0.407182
10	Models_1_4	1ch	N	Y	NASSAL	2126.22	0.720999	0.306005	0.0680821	0.090611	0.13642	0.224838	0.344145	0.442574	0.267569	0.127636	0.0650459	0.442574
10	Models_3_4	NN1ch-LGBM-1	N	Y	NASSAL	2454.03	0.718861	0.300493	0.0431866	0.0431866	0.0431866	0.0433378	0.0762825	0.152708	0.316562	0.359626	0.103128	0.359626
10	Models_3_2_6	NN1ch-LGBM-1	Y	N	ABDOMINAL_RRI	4624.45	0.748893	0.300004	0.0431866	0.0431866	0.0431866	0.0435306	0.0447328	0.134529	0.229034	0.299181	0.143243	0.299181
10	Models_2_3_6	NN1ch-LGBM-3	Y	N	CHEST_RRI	4926.51	0.772241	0.299033	0.0431866	0.0431866	0.0431866	0.0431866	0.0431866	0.043601	0.175082	0.319482	0.0638603	0.319482
10	Models_2_3	NN1ch-LGBM-3	N	N	CHEST	2600.76	0.769226	0.295994	0.0431866	0.0431866	0.0431866	0.0431866	0.0431866	0.0588191	0.134258	0.285398	0.0638603	0.285398
10	Models_1_2	1ch	N	N	ABDOMINAL	2093.32	0.74078	0.288537	0.0725777	0.27205	0.299401	0.255333	0.206572	0.15477	0.117735	0.0650459	0.0638603	0.299401
10	Models_3_2	NN1ch-LGBM-1	N	N	ABDOMINAL	2418.15	0.740328	0.284213	0.0431866	0.0431866	0.0431866	0.0435306	0.0444111	0.110813	0.269683	0.260611	0.0792712	0.269683
10	Models_1_7	1ch	N	N	SPO2 + 10	2125.72	0.717733	0.283897	0.0431866	0.0435306	0.384394	0.557146	0.237749	0.0961433	0.0638603	0.0638603	0.0638603	0.557146
10	Models_1_5	1ch	N	N	SPO2	2130.24	0.689099	0.244325	0.0431866	0.24804	0.326746	0.230914	0.0656043	0.0638603	0.0638603	0.0638603	0.0638603	0.326746
10	Models_3_3_6	NN1ch-LGBM-1	Y	N	CHEST_RRI	4665.46	0.726874	0.230355	0.0431866	0.0431866	0.0431866	0.0431866	0.0438393	0.08623	0.21318	0.134767	0.0638603	0.21318
30	Models_2_6	NN1ch-LGBM-3	Y	N	RRI	829.432	0.620719	0.229531	0.0431866	0.0431866	0.041826	0.0421701	0.142951	0.119196	0.156388	0.0622379	0.0638603	0.156388
30	Models_1_6	1ch	Y	N	RRI	728.664	0.597013	0.221019	0.0769627	0.201233	0.260188	0.100256	0.0777092	0.0638603	0.0638603	0.0638603	0.0638603	0.260188
10	Models_1_3	1ch	N	N	CHEST	2108.03	0.70301	0.214126	0.0438393	0.109587	0.324142	0.300011	0.136331	0.0854013	0.0909058	0.064134	0.0638603	0.324142
30	Models_3_6	NN1ch-LGBM-1	Y	N	RRI	849.976	0.597792	0.212045	0.0431866	0.0431866	0.0431866	0.041826	0.168963	0.163982	0.130014	0.0638603	0.0638603	0.168963
10	Models_3_3	NN1ch-LGBM-1	N	N	CHEST	2431.49	0.702967	0.211251	0.0431866	0.0431866	0.0431866	0.0431866	0.0579807	0.0969474	0.218587	0.0638603	0.0638603	0.218587
10	Models_1_6	1ch	Y	N	RRI	2138.84	0.572424	0.137281	0.119185	0.268969	0.0756551	0.0638603	0.0638603	0.0638603	0.0638603	0.0638603	0.0638603	0.268969
10	Models_2_6	NN1ch-LGBM-3	Y	N	RRI	2674.99	0.57593	0.13368	0.0431866	0.0431866	0.0431866	0.0431866	0.0939552	0.0709741	0.0713075	0.0638603	0.0638603	0.0939552
10	Models_3_6	NN1ch-LGBM-1	Y	N	RRI	2648.02	0.571722	0.132658	0.0431866	0.0431866	0.0431866	0.041826	0.0543331	0.13699	0.0638603	0.0638603	0.0638603	0.13699

## Sheet: RESULTS_TEST
WS	fold	ID	ID	Name_models		AUROC	AUPR	f1_T_0.1	f1_T_0.2	f1_T_0.3	f1_T_0.4	f1_T_0.5	f1_T_0.6	f1_T_0.7	f1_T_0.8	f1_T_0.9	MAX
30	10	1	1	Models_4_4_5		0.88	0.63	0.52	0.37	0.26	0.12	0.11	0.11	0.1	0.1	0.1	0.52
80	10	2	2	Models_4_4_5		0.88	0.72	0.5	0.52	0.52	0.45	0.36	0.28	0.15	0.11	0.1	0.52
10	10	3	3	Models_4_4_5		0.79	0.4	0.46	0.33	0.18	0.13	0.11	0.1	0.1	0.1	0.1	0.46
30	10	4	4	Models_4_3_5		0.91	0.64	0.48	0.61	0.53	0.4	0.3	0.18	0.12	0.11	0.1	0.61
80	10	5	5	Models_4_3_5		0.92	0.75	0.4	0.62	0.65	0.52	0.38	0.25	0.17	0.15	0.12	0.65
10	10	6	6	Models_4_3_5		0.87	0.52	0.44	0.38	0.25	0.15	0.11	0.11	0.1	0.1	0.1	0.44
80	10	7	7	Models_4_3_4_5		0.91	0.74	0.38	0.6	0.61	0.48	0.28	0.23	0.18	0.15	0.11	0.61
10	10	8	8	Models_4_3_4_5		0.89	0.54	0.51	0.33	0.13	0.11	0.11	0.1	0.1	0.1	0.1	0.51
30	10	9	9	Models_4_3_4_5		0.86	0.57	0.56	0.41	0.2	0.12	0.11	0.11	0.11	0.1	0.1	0.56
80	10	10	10	Models_4_3_4		0.88	0.67	0.49	0.63	0.54	0.43	0.3	0.25	0.2	0.13	0.12	0.63
30	10	11	11	Models_4_3_4		0.86	0.58	0.49	0.51	0.34	0.26	0.17	0.14	0.11	0.11	0.1	0.51
10	10	12	12	Models_4_3_4		0.78	0.31	0.31	0.43	0.3	0.14	0.12	0.12	0.12	0.1	0.1	0.43
30	10	13	13	Models_4_2_5		0.91	0.67	0.5	0.61	0.43	0.29	0.2	0.12	0.11	0.11	0.1	0.61
80	10	14	14	Models_4_2_5		0.9	0.73	0.41	0.61	0.61	0.51	0.37	0.26	0.17	0.15	0.12	0.61
10	10	15	15	Models_4_2_5		0.87	0.47	0.44	0.5	0.3	0.21	0.14	0.11	0.1	0.1	0.1	0.5
80	10	16	16	Models_4_2_4_5		0.9	0.73	0.26	0.52	0.61	0.61	0.55	0.42	0.28	0.21	0.16	0.61
30	10	17	17	Models_4_2_4_5		0.92	0.71	0.59	0.59	0.46	0.27	0.19	0.14	0.12	0.11	0.1	0.59
10	10	18	18	Models_4_2_4_5		0.88	0.45	0.54	0.52	0.37	0.23	0.13	0.12	0.11	0.11	0.1	0.54
80	10	19	19	Models_4_2_4		0.91	0.73	0.19	0.51	0.62	0.5	0.44	0.3	0.22	0.18	0.14	0.62
30	10	20	20	Models_4_2_4		0.87	0.6	0.45	0.57	0.45	0.21	0.17	0.11	0.11	0.1	0.1	0.57
10	10	21	21	Models_4_2_4		0.8	0.34	0.42	0.36	0.25	0.13	0.12	0.1	0.1	0.1	0.1	0.42
80	10	22	22	Models_4_2_3_5		0.9	0.72	0.21	0.52	0.61	0.6	0.48	0.4	0.27	0.17	0.14	0.61
30	10	23	23	Models_4_2_3_5		0.92	0.69	0.66	0.51	0.35	0.25	0.16	0.14	0.11	0.11	0.1	0.66
10	10	24	24	Models_4_2_3_5		0.84	0.36	0.43	0.39	0.23	0.2	0.19	0.11	0.1	0.1	0.1	0.43
80	10	25	25	Models_4_2_3_4_5		0.92	0.76	0.37	0.57	0.62	0.56	0.49	0.36	0.27	0.19	0.15	0.62
30	10	26	26	Models_4_2_3_4_5		0.92	0.7	0.62	0.46	0.29	0.21	0.16	0.15	0.11	0.11	0.1	0.62
10	10	27	27	Models_4_2_3_4_5		0.87	0.51	0.44	0.53	0.35	0.27	0.14	0.11	0.11	0.1	0.1	0.53
80	10	28	28	Models_4_2_3_4		0.92	0.75	0.29	0.63	0.62	0.62	0.49	0.4	0.27	0.21	0.16	0.63
30	10	29	29	Models_4_2_3_4		0.84	0.53	0.41	0.47	0.34	0.16	0.11	0.11	0.1	0.1	0.1	0.47
10	10	30	30	Models_4_2_3_4		0.81	0.39	0.44	0.35	0.32	0.17	0.13	0.1	0.1	0.1	0.1	0.44
80	10	31	31	Models_4_2_3		0.91	0.73	0.33	0.5	0.61	0.6	0.49	0.4	0.28	0.18	0.14	0.61
30	10	32	32	Models_4_2_3		0.88	0.62	0.4	0.56	0.46	0.26	0.19	0.11	0.1	0.1	0.1	0.56
10	10	33	33	Models_4_2_3		0.81	0.36	0.42	0.4	0.21	0.16	0.17	0.1	0.1	0.1	0.1	0.42
80	10	34	34	Models_3_5		0.9	0.7	0.03	0.03	0.12	0.39	0.55	0.65	0.62	0.28	0.11	0.65
30	10	35	35	Models_3_5		0.9	0.61	0.03	0.03	0.18	0.43	0.57	0.62	0.46	0.19	0.11	0.62
10	10	36	36	Models_3_5		0.85	0.44	0.03	0.03	0.08	0.29	0.49	0.47	0.23	0.11	0.1	0.49
80	10	37	37	Models_3_4_5		0.91	0.75	0.03	0.07	0.21	0.46	0.55	0.64	0.64	0.38	0.19	0.64
30	10	38	38	Models_3_4_5		0.91	0.66	0.03	0.06	0.3	0.49	0.62	0.62	0.43	0.23	0.11	0.62
10	10	39	39	Models_3_4_5		0.87	0.49	0.03	0.04	0.11	0.39	0.58	0.42	0.22	0.12	0.1	0.58
80	10	40	40	Models_3_4		0.82	0.58	0.03	0.03	0.03	0.03	0.51	0.29	0.1	0.1	0.1	0.51
30	10	41	41	Models_3_4		0.79	0.48	0.03	0.03	0.03	0.16	0.46	0.43	0.11	0.1	0.1	0.46
10	10	42	42	Models_3_4		0.72	0.28	0.03	0.03	0.06	0.18	0.41	0.29	0.19	0.1	0.1	0.41
80	10	43	43	Models_3_3_5		0.92	0.76	0.03	0.06	0.22	0.4	0.56	0.65	0.63	0.48	0.17	0.65
30	10	44	44	Models_3_3_5		0.92	0.68	0.05	0.07	0.3	0.45	0.61	0.65	0.5	0.2	0.11	0.65
10	10	45	45	Models_3_3_5		0.86	0.45	0.03	0.03	0.11	0.31	0.49	0.47	0.23	0.11	0.1	0.49
80	10	46	46	Models_3_3_4_5		0.92	0.78	0.03	0.05	0.15	0.44	0.57	0.67	0.62	0.44	0.15	0.67
30	10	47	47	Models_3_3_4_5		0.93	0.69	0.04	0.1	0.33	0.52	0.64	0.63	0.51	0.23	0.11	0.64
10	10	48	48	Models_3_3_4_5		0.87	0.49	0.03	0.03	0.15	0.45	0.53	0.37	0.21	0.13	0.1	0.53
30	10	49	49	Models_3_3_4		0.88	0.59	0.03	0.06	0.11	0.39	0.52	0.6	0.41	0.2	0.11	0.6
80	10	50	50	Models_3_3_4		0.89	0.71	0.03	0.06	0.15	0.24	0.47	0.58	0.46	0.28	0.13	0.58
10	10	51	51	Models_3_3_4		0.75	0.3	0.03	0.03	0.07	0.17	0.51	0.3	0.2	0.11	0.1	0.51
80	10	52	52	Models_3_3		0.87	0.65	0.03	0.03	0.11	0.25	0.43	0.51	0.54	0.4	0.13	0.54
30	10	53	53	Models_3_3		0.85	0.51	0.03	0.05	0.1	0.26	0.45	0.51	0.39	0.2	0.1	0.51
10	10	54	54	Models_3_3		0.64	0.15	0.03	0.03	0.03	0.06	0.24	0.22	0.1	0.1	0.1	0.24
30	10	55	55	Models_3_2_5		0.92	0.68	0.03	0.17	0.29	0.52	0.61	0.66	0.51	0.26	0.12	0.66
80	10	56	56	Models_3_2_5		0.92	0.75	0.03	0.07	0.2	0.42	0.54	0.6	0.59	0.42	0.18	0.6
10	10	57	57	Models_3_2_5		0.88	0.49	0.03	0.03	0.12	0.31	0.57	0.56	0.27	0.16	0.1	0.57
30	10	58	58	Models_3_2_4_5		0.92	0.69	0.03	0.07	0.34	0.5	0.61	0.62	0.49	0.13	0.1	0.62
80	10	59	59	Models_3_2_4_5		0.92	0.76	0.03	0.1	0.3	0.47	0.56	0.54	0.56	0.47	0.18	0.56
10	10	60	60	Models_3_2_4_5		0.9	0.55	0.03	0.08	0.23	0.39	0.61	0.54	0.3	0.15	0.11	0.61
80	10	61	61	Models_3_2_4		0.87	0.67	0.03	0.05	0.18	0.43	0.55	0.49	0.52	0.28	0.16	0.55
30	10	62	62	Models_3_2_4		0.87	0.58	0.03	0.07	0.18	0.39	0.54	0.5	0.41	0.15	0.1	0.54
10	10	63	63	Models_3_2_4		0.82	0.4	0.03	0.03	0.1	0.32	0.45	0.46	0.3	0.14	0.1	0.46
80	10	64	64	Models_3_2_3_5		0.93	0.77	0.04	0.09	0.22	0.46	0.54	0.62	0.64	0.49	0.18	0.64
30	10	65	65	Models_3_2_3_5		0.93	0.7	0.04	0.15	0.31	0.51	0.58	0.66	0.51	0.29	0.11	0.66
10	10	66	66	Models_3_2_3_5		0.89	0.51	0.03	0.1	0.18	0.37	0.58	0.56	0.29	0.17	0.11	0.58
80	10	67	67	Models_3_2_3_4_5		0.93	0.78	0.05	0.12	0.33	0.49	0.56	0.62	0.63	0.46	0.22	0.63
30	10	68	68	Models_3_2_3_4_5		0.93	0.71	0.04	0.18	0.41	0.51	0.61	0.68	0.51	0.32	0.12	0.68
10	10	69	69	Models_3_2_3_4_5		0.89	0.53	0.03	0.1	0.22	0.41	0.63	0.53	0.25	0.14	0.11	0.63
80	10	70	70	Models_3_2_3_4		0.9	0.72	0.03	0.07	0.2	0.4	0.48	0.62	0.55	0.41	0.2	0.62
30	10	71	71	Models_3_2_3_4		0.89	0.61	0.03	0.05	0.18	0.36	0.52	0.53	0.46	0.19	0.1	0.53
10	10	72	72	Models_3_2_3_4		0.83	0.41	0.03	0.03	0.14	0.28	0.47	0.53	0.28	0.15	0.1	0.53
80	10	73	73	Models_3_2_3		0.9	0.71	0.03	0.08	0.15	0.3	0.41	0.56	0.58	0.39	0.2	0.58
30	10	74	74	Models_3_2_3		0.88	0.59	0.03	0.06	0.13	0.31	0.45	0.58	0.45	0.2	0.1	0.58
10	10	75	75	Models_3_2_3		0.8	0.32	0.03	0.03	0.1	0.23	0.38	0.53	0.3	0.14	0.1	0.53
80	10	76	76	Models_3_2		0.85	0.63	0.03	0.03	0.05	0.22	0.51	0.5	0.36	0.1	0.1	0.51
30	10	77	77	Models_3_2		0.84	0.49	0.03	0.03	0.24	0.24	0.42	0.55	0.41	0.21	0.1	0.55
10	10	78	78	Models_3_2		0.79	0.3	0.03	0.03	0.1	0.2	0.35	0.47	0.33	0.15	0.1	0.47
80	10	79	79	Models_2_5		0.89	0.69	0.03	0.03	0.03	0.11	0.49	0.66	0.13	0.1	0.1	0.66
30	10	80	80	Models_2_5		0.9	0.61	0.03	0.03	0.17	0.49	0.57	0.66	0.44	0.19	0.1	0.66
10	10	81	81	Models_2_5		0.86	0.48	0.03	0.03	0.08	0.26	0.5	0.46	0.21	0.11	0.1	0.5
80	10	82	82	Models_2_4_5		0.91	0.74	0.03	0.09	0.23	0.34	0.48	0.62	0.6	0.46	0.19	0.62
30	10	83	83	Models_2_4_5		0.92	0.67	0.06	0.14	0.21	0.4	0.58	0.57	0.53	0.27	0.13	0.58
10	10	84	84	Models_2_4_5		0.88	0.52	0.03	0.07	0.11	0.33	0.45	0.44	0.24	0.13	0.1	0.45
30	10	85	85	Models_2_4		0.82	0.5	0.03	0.03	0.14	0.23	0.35	0.49	0.4	0.12	0.1	0.49
80	10	86	86	Models_2_4		0.84	0.61	0.03	0.03	0.09	0.16	0.33	0.45	0.43	0.34	0.13	0.45
10	10	87	87	Models_2_4		0.75	0.31	0.03	0.03	0.05	0.12	0.37	0.31	0.17	0.1	0.1	0.37
30	10	88	88	Models_2_3_5		0.92	0.68	0.04	0.12	0.25	0.4	0.61	0.65	0.51	0.22	0.11	0.65
80	10	89	89	Models_2_3_5		0.92	0.75	0.03	0.04	0.13	0.3	0.52	0.66	0.58	0.37	0.1	0.66
10	10	90	90	Models_2_3_5		0.89	0.53	0.03	0.08	0.13	0.32	0.52	0.54	0.32	0.13	0.11	0.54
30	10	91	91	Models_2_3_4_5		0.93	0.69	0.04	0.1	0.26	0.44	0.62	0.63	0.49	0.24	0.11	0.63
80	10	92	92	Models_2_3_4_5		0.93	0.78	0.03	0.09	0.22	0.31	0.52	0.63	0.63	0.43	0.15	0.63
10	10	93	93	Models_2_3_4_5		0.9	0.56	0.03	0.09	0.19	0.31	0.54	0.58	0.24	0.15	0.11	0.58
80	10	94	94	Models_2_3_4		0.9	0.71	0.03	0.08	0.14	0.27	0.42	0.54	0.57	0.46	0.2	0.57
30	10	95	95	Models_2_3_4		0.89	0.6	0.03	0.06	0.11	0.26	0.47	0.55	0.45	0.15	0.1	0.55
10	10	96	96	Models_2_3_4		0.83	0.39	0.03	0.03	0.11	0.2	0.33	0.43	0.29	0.11	0.1	0.43
80	10	97	97	Models_2_3		0.89	0.68	0.03	0.04	0.11	0.17	0.37	0.54	0.59	0.38	0.14	0.59
30	10	98	98	Models_2_3		0.86	0.55	0.03	0.05	0.16	0.28	0.42	0.48	0.51	0.3	0.1	0.51
10	10	99	99	Models_2_3		0.78	0.28	0.03	0.03	0.07	0.15	0.24	0.43	0.33	0.1	0.1	0.43
30	10	100	100	Models_2_2_5		0.92	0.67	0.03	0.12	0.29	0.44	0.64	0.67	0.51	0.3	0.11	0.67
80	10	101	101	Models_2_2_5		0.93	0.77	0.04	0.11	0.24	0.44	0.51	0.61	0.66	0.55	0.26	0.66
10	10	102	102	Models_2_2_5		0.9	0.57	0.03	0.09	0.18	0.29	0.59	0.53	0.28	0.15	0.11	0.59
30	10	103	103	Models_2_2_4_5		0.93	0.7	0.03	0.12	0.3	0.5	0.6	0.65	0.5	0.23	0.11	0.65
80	10	104	104	Models_2_2_4_5		0.93	0.78	0.06	0.16	0.23	0.41	0.5	0.59	0.64	0.56	0.28	0.64
10	10	105	105	Models_2_2_4_5		0.9	0.55	0.03	0.07	0.14	0.29	0.54	0.54	0.22	0.11	0.1	0.54
30	10	106	106	Models_2_2_4		0.88	0.61	0.03	0.06	0.14	0.41	0.53	0.58	0.48	0.15	0.1	0.58
80	10	107	107	Models_2_2_4		0.91	0.73	0.05	0.11	0.19	0.27	0.45	0.52	0.56	0.52	0.22	0.56
10	10	108	108	Models_2_2_4		0.83	0.43	0.03	0.03	0.13	0.25	0.33	0.49	0.33	0.13	0.1	0.49
30	10	109	109	Models_2_2_3_5		0.93	0.7	0.04	0.14	0.32	0.5	0.62	0.7	0.54	0.29	0.12	0.7
80	10	110	110	Models_2_2_3_5		0.93	0.77	0.03	0.06	0.17	0.35	0.53	0.63	0.68	0.45	0.1	0.68
10	10	111	111	Models_2_2_3_5		0.9	0.56	0.03	0.11	0.24	0.31	0.58	0.59	0.36	0.15	0.11	0.59
30	10	112	112	Models_2_2_3_4_5		0.93	0.72	0.04	0.14	0.27	0.47	0.62	0.65	0.52	0.26	0.11	0.65
80	10	113	113	Models_2_2_3_4_5		0.93	0.77	0.03	0.11	0.21	0.43	0.54	0.61	0.62	0.52	0.17	0.62
10	10	114	114	Models_2_2_3_4_5		0.91	0.57	0.03	0.1	0.22	0.28	0.58	0.58	0.26	0.12	0.11	0.58
80	10	115	115	Models_2_2_3_4		0.91	0.74	0.03	0.04	0.09	0.28	0.47	0.59	0.55	0.22	0.1	0.59
30	10	116	116	Models_2_2_3_4		0.9	0.61	0.03	0.1	0.25	0.37	0.52	0.58	0.54	0.29	0.11	0.58
10	10	117	117	Models_2_2_3_4		0.85	0.43	0.03	0.07	0.18	0.25	0.4	0.44	0.39	0.13	0.1	0.44
80	10	118	118	Models_2_2_3		0.91	0.73	0.03	0.1	0.19	0.31	0.44	0.53	0.58	0.56	0.22	0.58
30	10	119	119	Models_2_2_3		0.88	0.56	0.03	0.03	0.12	0.32	0.52	0.52	0.43	0.13	0.1	0.52
10	10	120	120	Models_2_2_3		0.84	0.4	0.03	0.07	0.15	0.3	0.4	0.44	0.38	0.21	0.1	0.44
30	10	121	121	Models_2_2		0.86	0.56	0.03	0.09	0.17	0.35	0.51	0.56	0.48	0.24	0.11	0.56
80	10	122	122	Models_2_2		0.89	0.7	0.03	0.07	0.15	0.31	0.45	0.52	0.58	0.4	0.15	0.58
10	10	123	123	Models_2_2		0.8	0.36	0.03	0.03	0.12	0.24	0.32	0.49	0.34	0.15	0.1	0.49
30	10	124	124	Models_1_9		0.87	0.56	0.39	0.59	0.59	0.37	0.19	0.13	0.11	0.1	0.1	0.59
80	10	125	125	Models_1_9		0.88	0.63	0.38	0.62	0.53	0.3	0.17	0.15	0.11	0.1	0.1	0.62
10	10	126	126	Models_1_9		0.77	0.32	0.46	0.32	0.13	0.11	0.1	0.1	0.1	0.1	0.1	0.46
80	10	127	127	Models_1_8		0.9	0.69	0.22	0.5	0.63	0.66	0.57	0.41	0.27	0.14	0.11	0.66
30	10	128	128	Models_1_8		0.82	0.47	0.13	0.56	0.26	0.11	0.1	0.1	0.1	0.1	0.1	0.56
10	10	129	129	Models_1_8		0.74	0.3	0.1	0.38	0.19	0.11	0.1	0.1	0.1	0.1	0.1	0.38
80	10	130	130	Models_1_7		0.89	0.67	0.32	0.58	0.64	0.56	0.34	0.15	0.11	0.1	0.1	0.64
30	10	131	131	Models_1_7		0.86	0.53	0.12	0.54	0.57	0.33	0.17	0.13	0.11	0.1	0.1	0.57
10	10	132	132	Models_1_7		0.74	0.29	0.03	0.42	0.21	0.11	0.1	0.1	0.1	0.1	0.1	0.42
80	10	133	133	Models_1_5		0.87	0.62	0.25	0.66	0.57	0.3	0.15	0.1	0.1	0.1	0.1	0.66
30	10	134	134	Models_1_5		0.85	0.52	0.16	0.54	0.56	0.22	0.16	0.11	0.11	0.1	0.1	0.56
10	10	135	135	Models_1_5		0.73	0.25	0.11	0.38	0.11	0.1	0.1	0.1	0.1	0.1	0.1	0.38
80	10	136	136	Models_1_4		0.79	0.57	0.27	0.5	0.42	0.29	0.27	0.2	0.14	0.11	0.1	0.5
30	10	137	137	Models_1_4		0.77	0.48	0.23	0.52	0.44	0.29	0.18	0.11	0.11	0.11	0.1	0.52
10	10	138	138	Models_1_4		0.71	0.28	0.18	0.39	0.34	0.24	0.19	0.11	0.1	0.1	0.1	0.39
80	10	139	139	Models_1_3		0.87	0.65	0.19	0.47	0.52	0.46	0.4	0.26	0.17	0.14	0.1	0.52
30	10	140	140	Models_1_3		0.85	0.52	0.44	0.48	0.38	0.25	0.17	0.11	0.1	0.1	0.1	0.48
10	10	141	141	Models_1_3		0.64	0.15	0.31	0.22	0.1	0.1	0.1	0.1	0.1	0.1	0.1	0.31
80	10	142	142	Models_1_2		0.85	0.64	0.49	0.49	0.43	0.37	0.29	0.18	0.16	0.14	0.1	0.49
30	10	143	143	Models_1_2		0.84	0.51	0.24	0.5	0.48	0.34	0.23	0.14	0.11	0.1	0.1	0.5
10	10	144	144	Models_1_2		0.79	0.3	0.38	0.49	0.33	0.24	0.17	0.13	0.12	0.1	0.1	0.49
80	10	145	145	Models_1_10		0.87	0.63	0.34	0.57	0.59	0.41	0.24	0.15	0.11	0.1	0.1	0.59
30	10	146	146	Models_1_10		0.86	0.54	0.46	0.59	0.25	0.12	0.11	0.1	0.1	0.1	0.1	0.59
10	10	147	147	Models_1_10		0.77	0.32	0.34	0.26	0.12	0.1	0.1	0.1	0.1	0.1	0.1	0.34

## Sheet: AVERAGES_TEST
							f1 multiclass - wieghted
WS	Name	Type	Nassal	Channels	AUROC	AUPR	f1_T_0.1	f1_T_0.2	f1_T_0.3	f1_T_0.4	f1_T_0.5	f1_T_0.6	f1_T_0.7	f1_T_0.8	f1_T_0.9	Max_f1_ahiC
30	Models_2_2_3_5	NN1ch-LGBM-3	N	ABDOMINAL_CHEST_SPO2	0.93	0.7	0.04	0.14	0.32	0.5	0.62	0.7	0.54	0.29	0.12	0.7
80	Models_2_2_3_5	NN1ch-LGBM-3	N	ABDOMINAL_CHEST_SPO2	0.93	0.77	0.03	0.06	0.17	0.35	0.53	0.63	0.68	0.45	0.1	0.68
30	Models_3_2_3_4_5	NN1ch-LGBM-1	Y	ABDOMINAL_CHEST_NASSAL_SPO2	0.93	0.71	0.04	0.18	0.41	0.51	0.61	0.68	0.51	0.32	0.12	0.68
80	Models_3_3_4_5	NN1ch-LGBM-1	Y	CHEST_NASSAL_SPO2	0.92	0.78	0.03	0.05	0.15	0.44	0.57	0.67	0.62	0.44	0.15	0.67
30	Models_2_2_5	NN1ch-LGBM-3	N	ABDOMINAL_SPO2	0.92	0.67	0.03	0.12	0.29	0.44	0.64	0.67	0.51	0.3	0.11	0.67
80	Models_2_2_5	NN1ch-LGBM-3	N	ABDOMINAL_SPO2	0.93	0.77	0.04	0.11	0.24	0.44	0.51	0.61	0.66	0.55	0.26	0.66
80	Models_2_3_5	NN1ch-LGBM-3	N	CHEST_SPO2	0.92	0.75	0.03	0.04	0.13	0.3	0.52	0.66	0.58	0.37	0.1	0.66
30	Models_3_2_3_5	NN1ch-LGBM-1	N	ABDOMINAL_CHEST_SPO2	0.93	0.7	0.04	0.15	0.31	0.51	0.58	0.66	0.51	0.29	0.11	0.66
80	Models_2_5	NN1ch-LGBM-3	N	SPO2	0.89	0.69	0.03	0.03	0.03	0.11	0.49	0.66	0.13	0.1	0.1	0.66
80	Models_1_8	1ch	N	SPO2 + 15	0.9	0.69	0.22	0.5	0.63	0.66	0.57	0.41	0.27	0.14	0.11	0.66
30	Models_4_2_3_5	NN2D	N	ABDOMINAL_CHEST_SPO2	0.92	0.69	0.66	0.51	0.35	0.25	0.16	0.14	0.11	0.11	0.1	0.66
30	Models_3_2_5	NN1ch-LGBM-1	N	ABDOMINAL_SPO2	0.92	0.68	0.03	0.17	0.29	0.52	0.61	0.66	0.51	0.26	0.12	0.66
80	Models_1_5	1ch	N	SPO2	0.87	0.62	0.25	0.66	0.57	0.3	0.15	0.1	0.1	0.1	0.1	0.66
30	Models_2_5	NN1ch-LGBM-3	N	SPO2	0.9	0.61	0.03	0.03	0.17	0.49	0.57	0.66	0.44	0.19	0.1	0.66
80	Models_3_3_5	NN1ch-LGBM-1	N	CHEST_SPO2	0.92	0.76	0.03	0.06	0.22	0.4	0.56	0.65	0.63	0.48	0.17	0.65
80	Models_4_3_5	NN2D	N	CHEST_SPO2	0.92	0.75	0.4	0.62	0.65	0.52	0.38	0.25	0.17	0.15	0.12	0.65
30	Models_2_2_3_4_5	NN1ch-LGBM-3	Y	ABDOMINAL_CHEST_NASSAL_SPO2	0.93	0.72	0.04	0.14	0.27	0.47	0.62	0.65	0.52	0.26	0.11	0.65
30	Models_2_2_4_5	NN1ch-LGBM-3	Y	ABDOMINAL_NASSAL_SPO2	0.93	0.7	0.03	0.12	0.3	0.5	0.6	0.65	0.5	0.23	0.11	0.65
80	Models_3_5	NN1ch-LGBM-1	N	SPO2	0.9	0.7	0.03	0.03	0.12	0.39	0.55	0.65	0.62	0.28	0.11	0.65
30	Models_2_3_5	NN1ch-LGBM-3	N	CHEST_SPO2	0.92	0.68	0.04	0.12	0.25	0.4	0.61	0.65	0.51	0.22	0.11	0.65
30	Models_3_3_5	NN1ch-LGBM-1	N	CHEST_SPO2	0.92	0.68	0.05	0.07	0.3	0.45	0.61	0.65	0.5	0.2	0.11	0.65
80	Models_2_2_4_5	NN1ch-LGBM-3	Y	ABDOMINAL_NASSAL_SPO2	0.93	0.78	0.06	0.16	0.23	0.41	0.5	0.59	0.64	0.56	0.28	0.64
80	Models_3_2_3_5	NN1ch-LGBM-1	N	ABDOMINAL_CHEST_SPO2	0.93	0.77	0.04	0.09	0.22	0.46	0.54	0.62	0.64	0.49	0.18	0.64
80	Models_3_4_5	NN1ch-LGBM-1	Y	NASSAL_SPO2	0.91	0.75	0.03	0.07	0.21	0.46	0.55	0.64	0.64	0.38	0.19	0.64
30	Models_3_3_4_5	NN1ch-LGBM-1	Y	CHEST_NASSAL_SPO2	0.93	0.69	0.04	0.1	0.33	0.52	0.64	0.63	0.51	0.23	0.11	0.64
80	Models_1_7	1ch	N	SPO2 + 10	0.89	0.67	0.32	0.58	0.64	0.56	0.34	0.15	0.11	0.1	0.1	0.64
80	Models_2_3_4_5	NN1ch-LGBM-3	Y	CHEST_NASSAL_SPO2	0.93	0.78	0.03	0.09	0.22	0.31	0.52	0.63	0.63	0.43	0.15	0.63
80	Models_3_2_3_4_5	NN1ch-LGBM-1	Y	ABDOMINAL_CHEST_NASSAL_SPO2	0.93	0.78	0.05	0.12	0.33	0.49	0.56	0.62	0.63	0.46	0.22	0.63
80	Models_4_2_3_4	NN2D	Y	ABDOMINAL_CHEST_NASSAL	0.92	0.75	0.29	0.63	0.62	0.62	0.49	0.4	0.27	0.21	0.16	0.63
30	Models_2_3_4_5	NN1ch-LGBM-3	Y	CHEST_NASSAL_SPO2	0.93	0.69	0.04	0.1	0.26	0.44	0.62	0.63	0.49	0.24	0.11	0.63
80	Models_4_3_4	NN2D	Y	CHEST_NASSAL	0.88	0.67	0.49	0.63	0.54	0.43	0.3	0.25	0.2	0.13	0.12	0.63
10	Models_3_2_3_4_5	NN1ch-LGBM-1	Y	ABDOMINAL_CHEST_NASSAL_SPO2	0.89	0.53	0.03	0.1	0.22	0.41	0.63	0.53	0.25	0.14	0.11	0.63
80	Models_2_2_3_4_5	NN1ch-LGBM-3	Y	ABDOMINAL_CHEST_NASSAL_SPO2	0.93	0.77	0.03	0.11	0.21	0.43	0.54	0.61	0.62	0.52	0.17	0.62
80	Models_4_2_3_4_5	NN2D	Y	ABDOMINAL_CHEST_NASSAL_SPO2	0.92	0.76	0.37	0.57	0.62	0.56	0.49	0.36	0.27	0.19	0.15	0.62
80	Models_2_4_5	NN1ch-LGBM-3	Y	NASSAL_SPO2	0.91	0.74	0.03	0.09	0.23	0.34	0.48	0.62	0.6	0.46	0.19	0.62
80	Models_4_2_4	NN2D	Y	ABDOMINAL_NASSAL	0.91	0.73	0.19	0.51	0.62	0.5	0.44	0.3	0.22	0.18	0.14	0.62
80	Models_3_2_3_4	NN1ch-LGBM-1	Y	ABDOMINAL_CHEST_NASSAL	0.9	0.72	0.03	0.07	0.2	0.4	0.48	0.62	0.55	0.41	0.2	0.62
30	Models_4_2_3_4_5	NN2D	Y	ABDOMINAL_CHEST_NASSAL_SPO2	0.92	0.7	0.62	0.46	0.29	0.21	0.16	0.15	0.11	0.11	0.1	0.62
30	Models_3_2_4_5	NN1ch-LGBM-1	Y	ABDOMINAL_NASSAL_SPO2	0.92	0.69	0.03	0.07	0.34	0.5	0.61	0.62	0.49	0.13	0.1	0.62
30	Models_3_4_5	NN1ch-LGBM-1	Y	NASSAL_SPO2	0.91	0.66	0.03	0.06	0.3	0.49	0.62	0.62	0.43	0.23	0.11	0.62
80	Models_1_9	1ch	N	SPO2 + 20	0.88	0.63	0.38	0.62	0.53	0.3	0.17	0.15	0.11	0.1	0.1	0.62
30	Models_3_5	NN1ch-LGBM-1	N	SPO2	0.9	0.61	0.03	0.03	0.18	0.43	0.57	0.62	0.46	0.19	0.11	0.62
80	Models_4_3_4_5	NN2D	Y	CHEST_NASSAL_SPO2	0.91	0.74	0.38	0.6	0.61	0.48	0.28	0.23	0.18	0.15	0.11	0.61
80	Models_4_2_4_5	NN2D	Y	ABDOMINAL_NASSAL_SPO2	0.9	0.73	0.26	0.52	0.61	0.61	0.55	0.42	0.28	0.21	0.16	0.61
80	Models_4_2_5	NN2D	N	ABDOMINAL_SPO2	0.9	0.73	0.41	0.61	0.61	0.51	0.37	0.26	0.17	0.15	0.12	0.61
80	Models_4_2_3	NN2D	N	ABDOMINAL_CHEST	0.91	0.73	0.33	0.5	0.61	0.6	0.49	0.4	0.28	0.18	0.14	0.61
80	Models_4_2_3_5	NN2D	N	ABDOMINAL_CHEST_SPO2	0.9	0.72	0.21	0.52	0.61	0.6	0.48	0.4	0.27	0.17	0.14	0.61
30	Models_4_2_5	NN2D	N	ABDOMINAL_SPO2	0.91	0.67	0.5	0.61	0.43	0.29	0.2	0.12	0.11	0.11	0.1	0.61
30	Models_4_3_5	NN2D	N	CHEST_SPO2	0.91	0.64	0.48	0.61	0.53	0.4	0.3	0.18	0.12	0.11	0.1	0.61
10	Models_3_2_4_5	NN1ch-LGBM-1	Y	ABDOMINAL_NASSAL_SPO2	0.9	0.55	0.03	0.08	0.23	0.39	0.61	0.54	0.3	0.15	0.11	0.61
80	Models_3_2_5	NN1ch-LGBM-1	N	ABDOMINAL_SPO2	0.92	0.75	0.03	0.07	0.2	0.42	0.54	0.6	0.59	0.42	0.18	0.6
30	Models_3_3_4	NN1ch-LGBM-1	Y	CHEST_NASSAL	0.88	0.59	0.03	0.06	0.11	0.39	0.52	0.6	0.41	0.2	0.11	0.6
80	Models_2_2_3_4	NN1ch-LGBM-3	Y	ABDOMINAL_CHEST_NASSAL	0.91	0.74	0.03	0.04	0.09	0.28	0.47	0.59	0.55	0.22	0.1	0.59
30	Models_4_2_4_5	NN2D	Y	ABDOMINAL_NASSAL_SPO2	0.92	0.71	0.59	0.59	0.46	0.27	0.19	0.14	0.12	0.11	0.1	0.59
80	Models_2_3	NN1ch-LGBM-3	N	CHEST	0.89	0.68	0.03	0.04	0.11	0.17	0.37	0.54	0.59	0.38	0.14	0.59
80	Models_1_10	1ch	N	SPO2 + 25	0.87	0.63	0.34	0.57	0.59	0.41	0.24	0.15	0.11	0.1	0.1	0.59
10	Models_2_2_5	NN1ch-LGBM-3	N	ABDOMINAL_SPO2	0.9	0.57	0.03	0.09	0.18	0.29	0.59	0.53	0.28	0.15	0.11	0.59
10	Models_2_2_3_5	NN1ch-LGBM-3	N	ABDOMINAL_CHEST_SPO2	0.9	0.56	0.03	0.11	0.24	0.31	0.58	0.59	0.36	0.15	0.11	0.59
30	Models_1_9	1ch	N	SPO2 + 20	0.87	0.56	0.39	0.59	0.59	0.37	0.19	0.13	0.11	0.1	0.1	0.59
30	Models_1_10	1ch	N	SPO2 + 25	0.86	0.54	0.46	0.59	0.25	0.12	0.11	0.1	0.1	0.1	0.1	0.59
80	Models_2_2_3	NN1ch-LGBM-3	N	ABDOMINAL_CHEST	0.91	0.73	0.03	0.1	0.19	0.31	0.44	0.53	0.58	0.56	0.22	0.58
80	Models_3_2_3	NN1ch-LGBM-1	N	ABDOMINAL_CHEST	0.9	0.71	0.03	0.08	0.15	0.3	0.41	0.56	0.58	0.39	0.2	0.58
80	Models_3_3_4	NN1ch-LGBM-1	Y	CHEST_NASSAL	0.89	0.71	0.03	0.06	0.15	0.24	0.47	0.58	0.46	0.28	0.13	0.58
80	Models_2_2	NN1ch-LGBM-3	N	ABDOMINAL	0.89	0.7	0.03	0.07	0.15	0.31	0.45	0.52	0.58	0.4	0.15	0.58
30	Models_2_4_5	NN1ch-LGBM-3	Y	NASSAL_SPO2	0.92	0.67	0.06	0.14	0.21	0.4	0.58	0.57	0.53	0.27	0.13	0.58
30	Models_2_2_3_4	NN1ch-LGBM-3	Y	ABDOMINAL_CHEST_NASSAL	0.9	0.61	0.03	0.1	0.25	0.37	0.52	0.58	0.54	0.29	0.11	0.58
30	Models_2_2_4	NN1ch-LGBM-3	Y	ABDOMINAL_NASSAL	0.88	0.61	0.03	0.06	0.14	0.41	0.53	0.58	0.48	0.15	0.1	0.58
30	Models_3_2_3	NN1ch-LGBM-1	N	ABDOMINAL_CHEST	0.88	0.59	0.03	0.06	0.13	0.31	0.45	0.58	0.45	0.2	0.1	0.58
10	Models_2_2_3_4_5	NN1ch-LGBM-3	Y	ABDOMINAL_CHEST_NASSAL_SPO2	0.91	0.57	0.03	0.1	0.22	0.28	0.58	0.58	0.26	0.12	0.11	0.58
10	Models_2_3_4_5	NN1ch-LGBM-3	Y	CHEST_NASSAL_SPO2	0.9	0.56	0.03	0.09	0.19	0.31	0.54	0.58	0.24	0.15	0.11	0.58
10	Models_3_2_3_5	NN1ch-LGBM-1	N	ABDOMINAL_CHEST_SPO2	0.89	0.51	0.03	0.1	0.18	0.37	0.58	0.56	0.29	0.17	0.11	0.58
10	Models_3_4_5	NN1ch-LGBM-1	Y	NASSAL_SPO2	0.87	0.49	0.03	0.04	0.11	0.39	0.58	0.42	0.22	0.12	0.1	0.58
80	Models_2_3_4	NN1ch-LGBM-3	Y	CHEST_NASSAL	0.9	0.71	0.03	0.08	0.14	0.27	0.42	0.54	0.57	0.46	0.2	0.57
30	Models_4_2_4	NN2D	Y	ABDOMINAL_NASSAL	0.87	0.6	0.45	0.57	0.45	0.21	0.17	0.11	0.11	0.1	0.1	0.57
30	Models_1_7	1ch	N	SPO2 + 10	0.86	0.53	0.12	0.54	0.57	0.33	0.17	0.13	0.11	0.1	0.1	0.57
10	Models_3_2_5	NN1ch-LGBM-1	N	ABDOMINAL_SPO2	0.88	0.49	0.03	0.03	0.12	0.31	0.57	0.56	0.27	0.16	0.1	0.57
80	Models_3_2_4_5	NN1ch-LGBM-1	Y	ABDOMINAL_NASSAL_SPO2	0.92	0.76	0.03	0.1	0.3	0.47	0.56	0.54	0.56	0.47	0.18	0.56
80	Models_2_2_4	NN1ch-LGBM-3	Y	ABDOMINAL_NASSAL	0.91	0.73	0.05	0.11	0.19	0.27	0.45	0.52	0.56	0.52	0.22	0.56
30	Models_4_2_3	NN2D	N	ABDOMINAL_CHEST	0.88	0.62	0.4	0.56	0.46	0.26	0.19	0.11	0.1	0.1	0.1	0.56
30	Models_4_3_4_5	NN2D	Y	CHEST_NASSAL_SPO2	0.86	0.57	0.56	0.41	0.2	0.12	0.11	0.11	0.11	0.1	0.1	0.56
30	Models_2_2	NN1ch-LGBM-3	N	ABDOMINAL	0.86	0.56	0.03	0.09	0.17	0.35	0.51	0.56	0.48	0.24	0.11	0.56
30	Models_1_5	1ch	N	SPO2	0.85	0.52	0.16	0.54	0.56	0.22	0.16	0.11	0.11	0.1	0.1	0.56
30	Models_1_8	1ch	N	SPO2 + 15	0.82	0.47	0.13	0.56	0.26	0.11	0.1	0.1	0.1	0.1	0.1	0.56
80	Models_3_2_4	NN1ch-LGBM-1	Y	ABDOMINAL_NASSAL	0.87	0.67	0.03	0.05	0.18	0.43	0.55	0.49	0.52	0.28	0.16	0.55
30	Models_2_3_4	NN1ch-LGBM-3	Y	CHEST_NASSAL	0.89	0.6	0.03	0.06	0.11	0.26	0.47	0.55	0.45	0.15	0.1	0.55
30	Models_3_2	NN1ch-LGBM-1	N	ABDOMINAL	0.84	0.49	0.03	0.03	0.24	0.24	0.42	0.55	0.41	0.21	0.1	0.55
80	Models_3_3	NN1ch-LGBM-1	N	CHEST	0.87	0.65	0.03	0.03	0.11	0.25	0.43	0.51	0.54	0.4	0.13	0.54
30	Models_3_2_4	NN1ch-LGBM-1	Y	ABDOMINAL_NASSAL	0.87	0.58	0.03	0.07	0.18	0.39	0.54	0.5	0.41	0.15	0.1	0.54
10	Models_2_2_4_5	NN1ch-LGBM-3	Y	ABDOMINAL_NASSAL_SPO2	0.9	0.55	0.03	0.07	0.14	0.29	0.54	0.54	0.22	0.11	0.1	0.54
10	Models_2_3_5	NN1ch-LGBM-3	N	CHEST_SPO2	0.89	0.53	0.03	0.08	0.13	0.32	0.52	0.54	0.32	0.13	0.11	0.54
10	Models_4_2_4_5	NN2D	Y	ABDOMINAL_NASSAL_SPO2	0.88	0.45	0.54	0.52	0.37	0.23	0.13	0.12	0.11	0.11	0.1	0.54
30	Models_3_2_3_4	NN1ch-LGBM-1	Y	ABDOMINAL_CHEST_NASSAL	0.89	0.61	0.03	0.05	0.18	0.36	0.52	0.53	0.46	0.19	0.1	0.53
10	Models_4_2_3_4_5	NN2D	Y	ABDOMINAL_CHEST_NASSAL_SPO2	0.87	0.51	0.44	0.53	0.35	0.27	0.14	0.11	0.11	0.1	0.1	0.53
10	Models_3_3_4_5	NN1ch-LGBM-1	Y	CHEST_NASSAL_SPO2	0.87	0.49	0.03	0.03	0.15	0.45	0.53	0.37	0.21	0.13	0.1	0.53
10	Models_3_2_3_4	NN1ch-LGBM-1	Y	ABDOMINAL_CHEST_NASSAL	0.83	0.41	0.03	0.03	0.14	0.28	0.47	0.53	0.28	0.15	0.1	0.53
10	Models_3_2_3	NN1ch-LGBM-1	N	ABDOMINAL_CHEST	0.8	0.32	0.03	0.03	0.1	0.23	0.38	0.53	0.3	0.14	0.1	0.53
80	Models_4_4_5	NN2D	Y	NASSAL_SPO2	0.88	0.72	0.5	0.52	0.52	0.45	0.36	0.28	0.15	0.11	0.1	0.52
80	Models_1_3	1ch	N	CHEST	0.87	0.65	0.19	0.47	0.52	0.46	0.4	0.26	0.17	0.14	0.1	0.52
30	Models_4_4_5	NN2D	Y	NASSAL_SPO2	0.88	0.63	0.52	0.37	0.26	0.12	0.11	0.11	0.1	0.1	0.1	0.52
30	Models_2_2_3	NN1ch-LGBM-3	N	ABDOMINAL_CHEST	0.88	0.56	0.03	0.03	0.12	0.32	0.52	0.52	0.43	0.13	0.1	0.52
30	Models_1_4	1ch	Y	NASSAL	0.77	0.48	0.23	0.52	0.44	0.29	0.18	0.11	0.11	0.11	0.1	0.52
80	Models_3_2	NN1ch-LGBM-1	N	ABDOMINAL	0.85	0.63	0.03	0.03	0.05	0.22	0.51	0.5	0.36	0.1	0.1	0.51
80	Models_3_4	NN1ch-LGBM-1	Y	NASSAL	0.82	0.58	0.03	0.03	0.03	0.03	0.51	0.29	0.1	0.1	0.1	0.51
30	Models_4_3_4	NN2D	Y	CHEST_NASSAL	0.86	0.58	0.49	0.51	0.34	0.26	0.17	0.14	0.11	0.11	0.1	0.51
30	Models_2_3	NN1ch-LGBM-3	N	CHEST	0.86	0.55	0.03	0.05	0.16	0.28	0.42	0.48	0.51	0.3	0.1	0.51
10	Models_4_3_4_5	NN2D	Y	CHEST_NASSAL_SPO2	0.89	0.54	0.51	0.33	0.13	0.11	0.11	0.1	0.1	0.1	0.1	0.51
30	Models_3_3	NN1ch-LGBM-1	N	CHEST	0.85	0.51	0.03	0.05	0.1	0.26	0.45	0.51	0.39	0.2	0.1	0.51
10	Models_3_3_4	NN1ch-LGBM-1	Y	CHEST_NASSAL	0.75	0.3	0.03	0.03	0.07	0.17	0.51	0.3	0.2	0.11	0.1	0.51
80	Models_1_4	1ch	Y	NASSAL	0.79	0.57	0.27	0.5	0.42	0.29	0.27	0.2	0.14	0.11	0.1	0.5
30	Models_1_2	1ch	N	ABDOMINAL	0.84	0.51	0.24	0.5	0.48	0.34	0.23	0.14	0.11	0.1	0.1	0.5
10	Models_2_5	NN1ch-LGBM-3	N	SPO2	0.86	0.48	0.03	0.03	0.08	0.26	0.5	0.46	0.21	0.11	0.1	0.5
10	Models_4_2_5	NN2D	N	ABDOMINAL_SPO2	0.87	0.47	0.44	0.5	0.3	0.21	0.14	0.11	0.1	0.1	0.1	0.5
80	Models_1_2	1ch	N	ABDOMINAL	0.85	0.64	0.49	0.49	0.43	0.37	0.29	0.18	0.16	0.14	0.1	0.49
30	Models_2_4	NN1ch-LGBM-3	Y	NASSAL	0.82	0.5	0.03	0.03	0.14	0.23	0.35	0.49	0.4	0.12	0.1	0.49
10	Models_3_3_5	NN1ch-LGBM-1	N	CHEST_SPO2	0.86	0.45	0.03	0.03	0.11	0.31	0.49	0.47	0.23	0.11	0.1	0.49
10	Models_3_5	NN1ch-LGBM-1	N	SPO2	0.85	0.44	0.03	0.03	0.08	0.29	0.49	0.47	0.23	0.11	0.1	0.49
10	Models_2_2_4	NN1ch-LGBM-3	Y	ABDOMINAL_NASSAL	0.83	0.43	0.03	0.03	0.13	0.25	0.33	0.49	0.33	0.13	0.1	0.49
10	Models_2_2	NN1ch-LGBM-3	N	ABDOMINAL	0.8	0.36	0.03	0.03	0.12	0.24	0.32	0.49	0.34	0.15	0.1	0.49
10	Models_1_2	1ch	N	ABDOMINAL	0.79	0.3	0.38	0.49	0.33	0.24	0.17	0.13	0.12	0.1	0.1	0.49
30	Models_1_3	1ch	N	CHEST	0.85	0.52	0.44	0.48	0.38	0.25	0.17	0.11	0.1	0.1	0.1	0.48
30	Models_4_2_3_4	NN2D	Y	ABDOMINAL_CHEST_NASSAL	0.84	0.53	0.41	0.47	0.34	0.16	0.11	0.11	0.1	0.1	0.1	0.47
10	Models_3_2	NN1ch-LGBM-1	N	ABDOMINAL	0.79	0.3	0.03	0.03	0.1	0.2	0.35	0.47	0.33	0.15	0.1	0.47
30	Models_3_4	NN1ch-LGBM-1	Y	NASSAL	0.79	0.48	0.03	0.03	0.03	0.16	0.46	0.43	0.11	0.1	0.1	0.46
10	Models_4_4_5	NN2D	Y	NASSAL_SPO2	0.79	0.4	0.46	0.33	0.18	0.13	0.11	0.1	0.1	0.1	0.1	0.46
10	Models_3_2_4	NN1ch-LGBM-1	Y	ABDOMINAL_NASSAL	0.82	0.4	0.03	0.03	0.1	0.32	0.45	0.46	0.3	0.14	0.1	0.46
10	Models_1_9	1ch	N	SPO2 + 20	0.77	0.32	0.46	0.32	0.13	0.11	0.1	0.1	0.1	0.1	0.1	0.46
80	Models_2_4	NN1ch-LGBM-3	Y	NASSAL	0.84	0.61	0.03	0.03	0.09	0.16	0.33	0.45	0.43	0.34	0.13	0.45
10	Models_2_4_5	NN1ch-LGBM-3	Y	NASSAL_SPO2	0.88	0.52	0.03	0.07	0.11	0.33	0.45	0.44	0.24	0.13	0.1	0.45
10	Models_4_3_5	NN2D	N	CHEST_SPO2	0.87	0.52	0.44	0.38	0.25	0.15	0.11	0.11	0.1	0.1	0.1	0.44
10	Models_2_2_3_4	NN1ch-LGBM-3	Y	ABDOMINAL_CHEST_NASSAL	0.85	0.43	0.03	0.07	0.18	0.25	0.4	0.44	0.39	0.13	0.1	0.44
10	Models_2_2_3	NN1ch-LGBM-3	N	ABDOMINAL_CHEST	0.84	0.4	0.03	0.07	0.15	0.3	0.4	0.44	0.38	0.21	0.1	0.44
10	Models_4_2_3_4	NN2D	Y	ABDOMINAL_CHEST_NASSAL	0.81	0.39	0.44	0.35	0.32	0.17	0.13	0.1	0.1	0.1	0.1	0.44
10	Models_2_3_4	NN1ch-LGBM-3	Y	CHEST_NASSAL	0.83	0.39	0.03	0.03	0.11	0.2	0.33	0.43	0.29	0.11	0.1	0.43
10	Models_4_2_3_5	NN2D	N	ABDOMINAL_CHEST_SPO2	0.84	0.36	0.43	0.39	0.23	0.2	0.19	0.11	0.1	0.1	0.1	0.43
10	Models_4_3_4	NN2D	Y	CHEST_NASSAL	0.78	0.31	0.31	0.43	0.3	0.14	0.12	0.12	0.12	0.1	0.1	0.43
10	Models_2_3	NN1ch-LGBM-3	N	CHEST	0.78	0.28	0.03	0.03	0.07	0.15	0.24	0.43	0.33	0.1	0.1	0.43
10	Models_4_2_3	NN2D	N	ABDOMINAL_CHEST	0.81	0.36	0.42	0.4	0.21	0.16	0.17	0.1	0.1	0.1	0.1	0.42
10	Models_4_2_4	NN2D	Y	ABDOMINAL_NASSAL	0.8	0.34	0.42	0.36	0.25	0.13	0.12	0.1	0.1	0.1	0.1	0.42
10	Models_1_7	1ch	N	SPO2 + 10	0.74	0.29	0.03	0.42	0.21	0.11	0.1	0.1	0.1	0.1	0.1	0.42
10	Models_3_4	NN1ch-LGBM-1	Y	NASSAL	0.72	0.28	0.03	0.03	0.06	0.18	0.41	0.29	0.19	0.1	0.1	0.41
10	Models_1_4	1ch	Y	NASSAL	0.71	0.28	0.18	0.39	0.34	0.24	0.19	0.11	0.1	0.1	0.1	0.39
10	Models_1_8	1ch	N	SPO2 + 15	0.74	0.3	0.1	0.38	0.19	0.11	0.1	0.1	0.1	0.1	0.1	0.38
10	Models_1_5	1ch	N	SPO2	0.73	0.25	0.11	0.38	0.11	0.1	0.1	0.1	0.1	0.1	0.1	0.38
10	Models_2_4	NN1ch-LGBM-3	Y	NASSAL	0.75	0.31	0.03	0.03	0.05	0.12	0.37	0.31	0.17	0.1	0.1	0.37
10	Models_1_10	1ch	N	SPO2 + 25	0.77	0.32	0.34	0.26	0.12	0.1	0.1	0.1	0.1	0.1	0.1	0.34
10	Models_1_3	1ch	N	CHEST	0.64	0.15	0.31	0.22	0.1	0.1	0.1	0.1	0.1	0.1	0.1	0.31
10	Models_3_3	NN1ch-LGBM-1	N	CHEST	0.64	0.15	0.03	0.03	0.03	0.06	0.24	0.22	0.1	0.1	0.1	0.24

## Sheet: Summary_Tables
VALIDATION
Average of AUPR	Column Labels
Row Labels	ABDOMINAL	ABDOMINAL_CHEST	ABDOMINAL_CHEST_NASSAL	ABDOMINAL_CHEST_NASSAL_RRI	ABDOMINAL_CHEST_NASSAL_SPO2	ABDOMINAL_CHEST_NASSAL_SPO2_RRI	ABDOMINAL_CHEST_RRI	ABDOMINAL_CHEST_SPO2	ABDOMINAL_CHEST_SPO2_RRI	ABDOMINAL_NASSAL	ABDOMINAL_NASSAL_RRI	ABDOMINAL_NASSAL_SPO2	ABDOMINAL_NASSAL_SPO2_RRI	ABDOMINAL_RRI	ABDOMINAL_SPO2	ABDOMINAL_SPO2_RRI	CHEST	CHEST_NASSAL	CHEST_NASSAL_RRI	CHEST_NASSAL_SPO2	CHEST_NASSAL_SPO2_RRI	CHEST_RRI	CHEST_SPO2	CHEST_SPO2_RRI	NASSAL	NASSAL_RRI	NASSAL_SPO2	NASSAL_SPO2_RRI	RRI	SPO2	SPO2 + 10	SPO2 + 15	SPO2 + 20	SPO2 + 25	SPO2_RRI	Grand Total
10	0.753491	0.795401	0.818323	0.833871	0.878996	0.890753	0.802924	0.869858	0.880777	0.798886	0.815795	0.866333	0.882172	0.768881	0.851064	0.869478	0.725067	0.79811	0.808338	0.875628	0.882768	0.749558	0.862334	0.868686	0.733357	0.759886	0.850806	0.868571	0.573359	0.790026	0.717733	0.734349	0.756871	0.764828	0.840761	0.811504
1ch	0.74078																0.70301								0.720999				0.572424	0.689099	0.717733	0.734349	0.756871	0.764828		0.711122
NN1ch-LGBM-1	0.740328	0.782037	0.812201	0.821543	0.880548	0.882558	0.792319	0.871189	0.872564	0.788698	0.799305	0.872631	0.874407	0.748893	0.854783	0.857905	0.702967	0.773133	0.785895	0.873047	0.873236	0.726874	0.858271	0.859058	0.718861	0.73516	0.858586	0.860631	0.571722	0.831203					0.835437	0.810193
NN1ch-LGBM-3	0.779366	0.815539	0.840976	0.846199	0.897337	0.898948	0.813528	0.888014	0.888991	0.826775	0.832285	0.886114	0.889936	0.788868	0.880415	0.881051	0.769226	0.824623	0.83078	0.889861	0.892301	0.772241	0.877631	0.878314	0.76021	0.784612	0.875454	0.876512	0.57593	0.849776					0.846085	0.837352
NN2D		0.788626	0.801794		0.859105			0.850372		0.781186		0.840253			0.817994			0.796573		0.863977			0.851099				0.818378									0.824487
30	0.83593	0.866821	0.87231	0.88183	0.911353	0.916037	0.864908	0.899647	0.910848	0.868241	0.869098	0.902181	0.909447	0.842889	0.899314	0.905021	0.818315	0.863089	0.869941	0.899846	0.908418	0.825021	0.896353	0.902094	0.806479	0.823957	0.889072	0.897907	0.605175	0.854809	0.840973	0.830755	0.819897	0.847034	0.877072	0.863591
1ch	0.830947																0.808401								0.794568				0.597013	0.815894	0.840973	0.830755	0.819897	0.847034		0.798387
NN1ch-LGBM-1	0.830399	0.860923	0.874984	0.87746	0.91008	0.910611	0.861841	0.905988	0.907522	0.859517	0.863141	0.906516	0.907404	0.834272	0.900331	0.90175	0.812995	0.858409	0.860159	0.903437	0.906185	0.817506	0.895783	0.898485	0.79572	0.811809	0.892698	0.894643	0.597792	0.873266					0.876901	0.864791
NN1ch-LGBM-3	0.846443	0.865836	0.883667	0.8862	0.916473	0.921463	0.867976	0.913146	0.914174	0.875703	0.875054	0.912672	0.911489	0.851507	0.906048	0.908292	0.833549	0.872773	0.879724	0.912545	0.910652	0.832536	0.903165	0.905704	0.82915	0.836105	0.902087	0.901171	0.620719	0.875267					0.877243	0.875759
NN2D		0.873703	0.858279		0.907505			0.879808		0.869503		0.887355			0.891563			0.858085		0.883555			0.890112				0.872432									0.879264
80	0.863369	0.872288	0.903935	0.899167	0.915689	0.920528	0.888763	0.912108	0.916036	0.894703	0.893868	0.911047	0.914858	0.873445	0.905531	0.908199	0.844413	0.881181	0.88687	0.90789	0.913129	0.848536	0.862365	0.901656	0.838115	0.85003	0.896119	0.901685	0.652688	0.860362	0.86734	0.855845	0.835412	0.822599	0.877153	0.877249
1ch	0.859307																0.838156								0.833617				0.648261	0.836009	0.86734	0.855845	0.835412	0.822599		0.821839
NN1ch-LGBM-1	0.858387	0.881676	0.898101	0.899728	0.91441	0.918328	0.88446	0.910032	0.912479	0.889195	0.893367	0.912621	0.914138	0.866308	0.905086	0.90458	0.838081	0.880774	0.883785	0.91129	0.911618	0.841796	0.898648	0.901435	0.836822	0.849861	0.900511	0.900507	0.646332	0.873743					0.876743	0.881124
NN1ch-LGBM-3	0.872412	0.890189	0.904484	0.898606	0.920634	0.922728	0.893066	0.914391	0.919594	0.896729	0.894369	0.916083	0.915578	0.880582	0.910159	0.911818	0.857002	0.885768	0.889956	0.916903	0.91464	0.855277	0.909145	0.901876	0.843906	0.850199	0.900931	0.902863	0.66347	0.871333					0.877563	0.887169
NN2D		0.845	0.909218		0.912024			0.911901		0.898185		0.904438			0.901348			0.877002		0.895478			0.779301				0.886916									0.88371
Grand Total	0.817597	0.844837	0.864856	0.871623	0.902013	0.909106	0.852199	0.893871	0.902554	0.853944	0.859587	0.893187	0.902159	0.828405	0.885303	0.894233	0.795932	0.84746	0.85505	0.894455	0.901438	0.807705	0.873684	0.890812	0.79265	0.811291	0.878666	0.889388	0.610407	0.835066	0.808682	0.806983	0.80406	0.811487	0.864995	0.850781
Average of AUPR	Column Labels
Row Labels	ABDOMINAL	ABDOMINAL_CHEST	ABDOMINAL_CHEST_NASSAL	ABDOMINAL_CHEST_NASSAL_RRI	ABDOMINAL_CHEST_NASSAL_SPO2	ABDOMINAL_CHEST_NASSAL_SPO2_RRI	ABDOMINAL_CHEST_RRI	ABDOMINAL_CHEST_SPO2	ABDOMINAL_CHEST_SPO2_RRI	ABDOMINAL_NASSAL	ABDOMINAL_NASSAL_RRI	ABDOMINAL_NASSAL_SPO2	ABDOMINAL_NASSAL_SPO2_RRI	ABDOMINAL_RRI	ABDOMINAL_SPO2	ABDOMINAL_SPO2_RRI	CHEST	CHEST_NASSAL	CHEST_NASSAL_RRI	CHEST_NASSAL_SPO2	CHEST_NASSAL_SPO2_RRI	CHEST_RRI	CHEST_SPO2	CHEST_SPO2_RRI	NASSAL	NASSAL_RRI	NASSAL_SPO2	NASSAL_SPO2_RRI	RRI	SPO2	SPO2 + 10	SPO2 + 15	SPO2 + 20	SPO2 + 25	SPO2_RRI	Grand Total
10	0.309866	0.367429	0.423712	0.437634	0.5529	0.568027	0.377649	0.513137	0.541683	0.389507	0.414958	0.530691	0.55713	0.326402	0.500301	0.527035	0.240457	0.379509	0.383665	0.536503	0.547751	0.264694	0.501052	0.510858	0.314646	0.328603	0.499159	0.527892	0.134539	0.38969	0.283897	0.318095	0.343911	0.340055	0.467148	0.421921
1ch	0.288537																0.214126								0.306005				0.137281	0.244325	0.283897	0.318095	0.343911	0.340055		0.275137
NN1ch-LGBM-1	0.284213	0.345621	0.405745	0.411012	0.539026	0.543239	0.360951	0.518424	0.520757	0.378535	0.389765	0.533242	0.536178	0.300004	0.490652	0.497876	0.211251	0.341367	0.348044	0.517224	0.520416	0.230355	0.482716	0.486291	0.300493	0.31113	0.502535	0.504638	0.132658	0.438001					0.450566	0.413965
NN1ch-LGBM-3	0.356848	0.406731	0.460532	0.464256	0.587196	0.592816	0.394347	0.561233	0.562609	0.435819	0.440151	0.566654	0.578082	0.352801	0.555753	0.556195	0.295994	0.415853	0.419286	0.567439	0.575085	0.299033	0.531606	0.535425	0.337442	0.346075	0.549279	0.551145	0.13368	0.486743					0.483731	0.464511
NN2D		0.349935	0.404859		0.532477			0.459754		0.354167		0.492178			0.454497			0.381307		0.524847			0.488835				0.445664									0.444411
30	0.544312	0.598296	0.613006	0.627953	0.696839	0.703071	0.587115	0.66791	0.689273	0.612489	0.602475	0.683133	0.689384	0.54653	0.670357	0.67716	0.499435	0.59767	0.596697	0.671104	0.677719	0.497339	0.643169	0.660674	0.511736	0.529698	0.656425	0.661067	0.220865	0.574793	0.544844	0.529651	0.500486	0.554955	0.606793	0.600249
1ch	0.535783																0.493963								0.50385				0.221019	0.520036	0.544844	0.529651	0.500486	0.554955		0.489399
NN1ch-LGBM-1	0.527709	0.58818	0.61284	0.620587	0.685838	0.686741	0.587106	0.674825	0.681623	0.592609	0.596222	0.681482	0.68577	0.531577	0.666685	0.672057	0.487482	0.584042	0.580311	0.668192	0.674613	0.489924	0.649479	0.652468	0.492063	0.516827	0.652945	0.653705	0.212045	0.598842					0.610262	0.600486
NN1ch-LGBM-3	0.569444	0.588715	0.626181	0.635319	0.70248	0.719401	0.587124	0.689613	0.696923	0.615046	0.608728	0.69751	0.692998	0.561482	0.677689	0.682264	0.51686	0.605255	0.613083	0.692781	0.680825	0.504753	0.659043	0.66888	0.539296	0.542569	0.678023	0.668429	0.229531	0.605499					0.603324	0.618035
NN2D		0.617994	0.599995		0.702199			0.639292		0.629812		0.670407			0.666696			0.603713		0.652339			0.620984				0.638307									0.640158
80	0.696416	0.702305	0.757456	0.745681	0.780241	0.790512	0.727759	0.770505	0.780704	0.739358	0.73809	0.773812	0.779931	0.70567	0.75525	0.766138	0.634229	0.713157	0.722185	0.760185	0.769843	0.63929	0.692581	0.738031	0.65363	0.659843	0.748384	0.75144	0.321293	0.654585	0.663631	0.651946	0.618197	0.596697	0.683628	0.707172
1ch	0.691307																0.626438								0.653518				0.322245	0.613128	0.663631	0.651946	0.618197	0.596697		0.604123
NN1ch-LGBM-1	0.68688	0.72224	0.749308	0.752895	0.776935	0.787662	0.727047	0.770161	0.775163	0.734978	0.740908	0.777715	0.782461	0.697151	0.76293	0.761442	0.617101	0.715188	0.720788	0.768312	0.7681	0.635742	0.732644	0.740797	0.643336	0.65981	0.751046	0.748285	0.315665	0.674405					0.684716	0.715542
NN1ch-LGBM-3	0.711061	0.731089	0.750138	0.738467	0.786428	0.793361	0.728471	0.770444	0.786245	0.744476	0.735272	0.778609	0.777401	0.714189	0.768024	0.770835	0.659149	0.716972	0.723582	0.780115	0.771586	0.642839	0.751001	0.735265	0.664037	0.659876	0.751506	0.754596	0.32597	0.676221					0.682541	0.721928
NN2D		0.653586	0.772921		0.777358			0.770909		0.73862		0.76511			0.734797			0.707311		0.732128			0.594098				0.7426									0.726312
Grand Total	0.516865	0.55601	0.598058	0.603756	0.67666	0.687203	0.564174	0.650517	0.670553	0.580451	0.585174	0.662545	0.675482	0.526201	0.641969	0.656778	0.458041	0.563445	0.567516	0.655931	0.665104	0.467108	0.612267	0.636521	0.493338	0.506048	0.634656	0.6468	0.225566	0.539689	0.497458	0.499897	0.487531	0.497236	0.585857	0.576447
Average of Max_f1_ahiC	Column Labels
Row Labels	ABDOMINAL	ABDOMINAL_CHEST	ABDOMINAL_CHEST_NASSAL	ABDOMINAL_CHEST_NASSAL_RRI	ABDOMINAL_CHEST_NASSAL_SPO2	ABDOMINAL_CHEST_NASSAL_SPO2_RRI	ABDOMINAL_CHEST_RRI	ABDOMINAL_CHEST_SPO2	ABDOMINAL_CHEST_SPO2_RRI	ABDOMINAL_NASSAL	ABDOMINAL_NASSAL_RRI	ABDOMINAL_NASSAL_SPO2	ABDOMINAL_NASSAL_SPO2_RRI	ABDOMINAL_RRI	ABDOMINAL_SPO2	ABDOMINAL_SPO2_RRI	CHEST	CHEST_NASSAL	CHEST_NASSAL_RRI	CHEST_NASSAL_SPO2	CHEST_NASSAL_SPO2_RRI	CHEST_RRI	CHEST_SPO2	CHEST_SPO2_RRI	NASSAL	NASSAL_RRI	NASSAL_SPO2	NASSAL_SPO2_RRI	RRI	SPO2	SPO2 + 10	SPO2 + 15	SPO2 + 20	SPO2 + 25	SPO2_RRI	Grand Total
10	0.33921	0.354361	0.383591	0.322426	0.527735	0.507781	0.356369	0.467658	0.423239	0.336016	0.373969	0.449808	0.443557	0.306813	0.474794	0.480988	0.276042	0.374102	0.310106	0.501065	0.480969	0.266331	0.47	0.421563	0.385366	0.341619	0.456098	0.484549	0.166638	0.402663	0.557146	0.559878	0.521338	0.455842	0.475929	0.404659
1ch	0.299401																0.324142								0.442574				0.268969	0.326746	0.557146	0.559878	0.521338	0.455842		0.417337
NN1ch-LGBM-1	0.269683	0.320904	0.355313	0.350608	0.493737	0.460842	0.352823	0.460545	0.442486	0.244844	0.35229	0.461043	0.4243	0.299181	0.466019	0.447299	0.218587	0.371387	0.249808	0.432778	0.43492	0.21318	0.430021	0.420462	0.359626	0.407182	0.469005	0.48102	0.13699	0.45709					0.453972	0.378643
NN1ch-LGBM-3	0.448546	0.349111	0.33277	0.294244	0.561675	0.55472	0.359916	0.488352	0.403993	0.389965	0.395649	0.42793	0.462813	0.314445	0.528313	0.514678	0.285398	0.376723	0.370404	0.550632	0.527018	0.319482	0.464598	0.422663	0.353899	0.276057	0.454964	0.488079	0.0939552	0.424153					0.497886	0.410743
NN2D		0.393067	0.462689		0.527793			0.454076		0.373238		0.460451			0.430049			0.374198		0.519783			0.515381				0.444326									0.450459
30	0.49396	0.481369	0.493647	0.540652	0.531799	0.567627	0.472971	0.494545	0.567048	0.509716	0.52654	0.554811	0.561824	0.521079	0.528809	0.522904	0.360405	0.492295	0.468263	0.526041	0.513554	0.385619	0.5355	0.502246	0.439117	0.472904	0.537839	0.588012	0.19518	0.525698	0.504922	0.518984	0.468365	0.514127	0.531702	0.495055
1ch	0.477602																0.402757								0.435024				0.260188	0.605993	0.504922	0.518984	0.468365	0.514127		0.465329
NN1ch-LGBM-1	0.462922	0.522485	0.51393	0.512563	0.546223	0.59614	0.498734	0.541205	0.576915	0.489131	0.499235	0.542073	0.536364	0.536289	0.525646	0.49778	0.341769	0.466581	0.466245	0.512102	0.510673	0.345567	0.523416	0.501195	0.360153	0.433748	0.537822	0.559924	0.168963	0.5561					0.53117	0.490744
NN1ch-LGBM-3	0.541358	0.45481	0.484371	0.568741	0.517854	0.539113	0.447209	0.46105	0.55718	0.467294	0.553845	0.530056	0.587284	0.505869	0.495117	0.548028	0.336689	0.535725	0.470282	0.537517	0.516436	0.425671	0.531948	0.503297	0.522173	0.512059	0.558755	0.6161	0.156388	0.414999					0.532234	0.497724
NN2D		0.466814	0.482641		0.531318			0.48138		0.572722		0.592304			0.565662			0.474578		0.528503			0.551136				0.516941									0.524
80	0.518813	0.50221	0.576933	0.546289	0.637403	0.660859	0.517807	0.638123	0.569986	0.557527	0.580987	0.640675	0.669801	0.530487	0.627763	0.636837	0.488187	0.540461	0.501522	0.668635	0.678773	0.46289	0.59729	0.654866	0.549038	0.549144	0.670217	0.682581	0.252652	0.548895	0.637332	0.528428	0.451218	0.453212	0.540697	0.569289
1ch	0.546923																0.505364								0.547662				0.302058	0.482275	0.637332	0.528428	0.451218	0.453212		0.494941
NN1ch-LGBM-1	0.529476	0.547333	0.587422	0.570575	0.628302	0.694649	0.556251	0.654919	0.550761	0.60181	0.606785	0.732301	0.718751	0.557883	0.648619	0.707558	0.494343	0.509405	0.5133	0.687521	0.695467	0.489478	0.655063	0.68048	0.541565	0.546786	0.737136	0.716345	0.232652	0.607158					0.642445	0.601372
NN1ch-LGBM-3	0.48004	0.526876	0.578102	0.522002	0.640112	0.62707	0.479362	0.598179	0.58921	0.541915	0.555189	0.593123	0.620851	0.503091	0.584333	0.566115	0.464853	0.512409	0.489744	0.684196	0.662079	0.436302	0.632829	0.629253	0.557887	0.551502	0.644276	0.648817	0.223247	0.557254					0.438948	0.552876
NN2D		0.43242	0.565275		0.643795			0.661271		0.528857		0.5966			0.650338			0.59957		0.634188			0.50398				0.629239									0.585957
Grand Total	0.450661	0.44598	0.484724	0.469789	0.565646	0.578756	0.449049	0.533442	0.520091	0.467753	0.493832	0.548431	0.558394	0.452793	0.543789	0.54691	0.374878	0.468953	0.42663	0.565247	0.557765	0.371613	0.534263	0.526225	0.45784	0.454556	0.554718	0.585048	0.204823	0.492419	0.566467	0.535763	0.480307	0.474394	0.516109	0.489668
TEST
Average of AUPR	Column Labels
Row Labels	ABDOMINAL	ABDOMINAL_CHEST	ABDOMINAL_CHEST_NASSAL	ABDOMINAL_CHEST_NASSAL_SPO2	ABDOMINAL_CHEST_SPO2	ABDOMINAL_NASSAL	ABDOMINAL_NASSAL_SPO2	ABDOMINAL_SPO2	CHEST	CHEST_NASSAL	CHEST_NASSAL_SPO2	CHEST_SPO2	NASSAL	NASSAL_SPO2	SPO2	SPO2 + 10	SPO2 + 15	SPO2 + 20	SPO2 + 25	Grand Total
10	0.32	0.36	0.41	0.536667	0.476667	0.39	0.516667	0.51	0.193333	0.333333	0.53	0.5	0.29	0.47	0.39	0.29	0.3	0.32	0.32	0.406327
1ch	0.3								0.15				0.28		0.25	0.29	0.3	0.32	0.32	0.27625
NN1ch-LGBM-1	0.3	0.32	0.41	0.53	0.51	0.4	0.55	0.49	0.15	0.3	0.49	0.45	0.28	0.49	0.44					0.407333
NN1ch-LGBM-3	0.36	0.4	0.43	0.57	0.56	0.43	0.55	0.57	0.28	0.39	0.56	0.53	0.31	0.52	0.48					0.462667
NN2D		0.36	0.39	0.51	0.36	0.34	0.45	0.47		0.31	0.54	0.52		0.4						0.422727
30	0.52	0.59	0.583333	0.71	0.696667	0.596667	0.7	0.673333	0.526667	0.59	0.65	0.666667	0.486667	0.653333	0.58	0.53	0.47	0.56	0.54	0.607551
1ch	0.51								0.52				0.48		0.52	0.53	0.47	0.56	0.54	0.51625
NN1ch-LGBM-1	0.49	0.59	0.61	0.71	0.7	0.58	0.69	0.68	0.51	0.59	0.69	0.68	0.48	0.66	0.61					0.618
NN1ch-LGBM-3	0.56	0.56	0.61	0.72	0.7	0.61	0.7	0.67	0.55	0.6	0.69	0.68	0.5	0.67	0.61					0.628667
NN2D		0.62	0.53	0.7	0.69	0.6	0.71	0.67		0.58	0.57	0.64		0.63						0.630909
80	0.656667	0.723333	0.736667	0.77	0.753333	0.71	0.756667	0.75	0.66	0.696667	0.766667	0.753333	0.586667	0.736667	0.67	0.67	0.69	0.63	0.63	0.710204
1ch	0.64								0.65				0.57		0.62	0.67	0.69	0.63	0.63	0.6375
NN1ch-LGBM-1	0.63	0.71	0.72	0.78	0.77	0.67	0.76	0.75	0.65	0.71	0.78	0.76	0.58	0.75	0.7					0.714667
NN1ch-LGBM-3	0.7	0.73	0.74	0.77	0.77	0.73	0.78	0.77	0.68	0.71	0.78	0.75	0.61	0.74	0.69					0.73
NN2D		0.73	0.75	0.76	0.72	0.73	0.73	0.73		0.67	0.74	0.75		0.72						0.73
Grand Total	0.498889	0.557778	0.576667	0.672222	0.642222	0.565556	0.657778	0.644444	0.46	0.54	0.648889	0.64	0.454444	0.62	0.546667	0.496667	0.486667	0.503333	0.496667	0.574694
Average of AUROC	Column Labels
Row Labels	ABDOMINAL	ABDOMINAL_CHEST	ABDOMINAL_CHEST_NASSAL	ABDOMINAL_CHEST_NASSAL_SPO2	ABDOMINAL_CHEST_SPO2	ABDOMINAL_NASSAL	ABDOMINAL_NASSAL_SPO2	ABDOMINAL_SPO2	CHEST	CHEST_NASSAL	CHEST_NASSAL_SPO2	CHEST_SPO2	NASSAL	NASSAL_SPO2	SPO2	SPO2 + 10	SPO2 + 15	SPO2 + 20	SPO2 + 25	Grand Total
10	0.793333	0.816667	0.83	0.89	0.876667	0.816667	0.893333	0.883333	0.686667	0.786667	0.886667	0.873333	0.726667	0.846667	0.813333	0.74	0.74	0.77	0.77	0.822041
1ch	0.79								0.64				0.71		0.73	0.74	0.74	0.77	0.77	0.73625
NN1ch-LGBM-1	0.79	0.8	0.83	0.89	0.89	0.82	0.9	0.88	0.64	0.75	0.87	0.86	0.72	0.87	0.85					0.824
NN1ch-LGBM-3	0.8	0.84	0.85	0.91	0.9	0.83	0.9	0.9	0.78	0.83	0.9	0.89	0.75	0.88	0.86					0.854667
NN2D		0.81	0.81	0.87	0.84	0.8	0.88	0.87		0.78	0.89	0.87		0.79						0.837273
30	0.846667	0.88	0.876667	0.926667	0.926667	0.873333	0.923333	0.916667	0.853333	0.876667	0.906667	0.916667	0.793333	0.903333	0.883333	0.86	0.82	0.87	0.86	0.884082
1ch	0.84								0.85				0.77		0.85	0.86	0.82	0.87	0.86	0.84
NN1ch-LGBM-1	0.84	0.88	0.89	0.93	0.93	0.87	0.92	0.92	0.85	0.88	0.93	0.92	0.79	0.91	0.9					0.890667
NN1ch-LGBM-3	0.86	0.88	0.9	0.93	0.93	0.88	0.93	0.92	0.86	0.89	0.93	0.92	0.82	0.92	0.9					0.898
NN2D		0.88	0.84	0.92	0.92	0.87	0.92	0.91		0.86	0.86	0.91		0.88						0.888182
80	0.863333	0.906667	0.91	0.926667	0.92	0.896667	0.916667	0.916667	0.876667	0.89	0.92	0.92	0.816667	0.9	0.886667	0.89	0.9	0.88	0.87	0.896735
1ch	0.85								0.87				0.79		0.87	0.89	0.9	0.88	0.87	0.865
NN1ch-LGBM-1	0.85	0.9	0.9	0.93	0.93	0.87	0.92	0.92	0.87	0.89	0.92	0.92	0.82	0.91	0.9					0.896667
NN1ch-LGBM-3	0.89	0.91	0.91	0.93	0.93	0.91	0.93	0.93	0.89	0.9	0.93	0.92	0.84	0.91	0.89					0.908
NN2D		0.91	0.92	0.92	0.9	0.91	0.9	0.9		0.88	0.91	0.92		0.88						0.904545
Grand Total	0.834444	0.867778	0.872222	0.914444	0.907778	0.862222	0.911111	0.905556	0.805556	0.851111	0.904444	0.903333	0.778889	0.883333	0.861111	0.83	0.82	0.84	0.833333	0.867619
Average of Max_f1_ahiC	Column Labels
Row Labels	ABDOMINAL	ABDOMINAL_CHEST	ABDOMINAL_CHEST_NASSAL	ABDOMINAL_CHEST_NASSAL_SPO2	ABDOMINAL_CHEST_SPO2	ABDOMINAL_NASSAL	ABDOMINAL_NASSAL_SPO2	ABDOMINAL_SPO2	CHEST	CHEST_NASSAL	CHEST_NASSAL_SPO2	CHEST_SPO2	NASSAL	NASSAL_SPO2	SPO2	SPO2 + 10	SPO2 + 15	SPO2 + 20	SPO2 + 25	Grand Total
10	0.483333	0.463333	0.47	0.58	0.533333	0.456667	0.563333	0.553333	0.326667	0.456667	0.54	0.49	0.39	0.496667	0.456667	0.42	0.38	0.46	0.34	0.477143
1ch	0.49								0.31				0.39		0.38	0.42	0.38	0.46	0.34	0.39625
NN1ch-LGBM-1	0.47	0.53	0.53	0.63	0.58	0.46	0.61	0.57	0.24	0.51	0.53	0.49	0.41	0.58	0.49					0.508667
NN1ch-LGBM-3	0.49	0.44	0.44	0.58	0.59	0.49	0.54	0.59	0.43	0.43	0.58	0.54	0.37	0.45	0.5					0.497333
NN2D		0.42	0.44	0.53	0.43	0.42	0.54	0.5		0.43	0.51	0.44		0.46						0.465455
30	0.536667	0.553333	0.526667	0.65	0.673333	0.563333	0.62	0.646667	0.5	0.553333	0.61	0.636667	0.49	0.573333	0.613333	0.57	0.56	0.59	0.59	0.582653
1ch	0.5								0.48				0.52		0.56	0.57	0.56	0.59	0.59	0.54625
NN1ch-LGBM-1	0.55	0.58	0.53	0.68	0.66	0.54	0.62	0.66	0.51	0.6	0.64	0.65	0.46	0.62	0.62					0.594667
NN1ch-LGBM-3	0.56	0.52	0.58	0.65	0.7	0.58	0.65	0.67	0.51	0.55	0.63	0.65	0.49	0.58	0.66					0.598667
NN2D		0.56	0.47	0.62	0.66	0.57	0.59	0.61		0.51	0.56	0.61		0.52						0.570909
80	0.526667	0.59	0.613333	0.623333	0.643333	0.576667	0.603333	0.623333	0.55	0.593333	0.636667	0.653333	0.486667	0.593333	0.656667	0.64	0.66	0.62	0.59	0.600408
1ch	0.49								0.52				0.5		0.66	0.64	0.66	0.62	0.59	0.585
NN1ch-LGBM-1	0.51	0.58	0.62	0.63	0.64	0.55	0.56	0.6	0.54	0.58	0.67	0.65	0.51	0.64	0.65					0.595333
NN1ch-LGBM-3	0.58	0.58	0.59	0.62	0.68	0.56	0.64	0.66	0.59	0.57	0.63	0.66	0.45	0.62	0.66					0.606
NN2D		0.61	0.63	0.62	0.61	0.62	0.61	0.61		0.63	0.61	0.65		0.52						0.610909
Grand Total	0.515556	0.535556	0.536667	0.617778	0.616667	0.532222	0.595556	0.607778	0.458889	0.534444	0.595556	0.593333	0.455556	0.554444	0.575556	0.543333	0.533333	0.556667	0.506667	0.553401
