# Supplementary material for: Towards automatic home-based sleep apnea estimation using deep learning
Source: NPJ Digit Med. 2024 Jun 1;7:144. doi: 10.1038/s41746-024-01139-z (PMC11144223; doi:10.1038/s41746-024-01139-z)
Supplement: Supplementary file 3 — Supplementary Table 5 [file 41746_2024_1139_MOESM3_ESM.xlsx]

## Sheet: VAL
WS	Name	Fold	Channel	AUROC_S	AUPR_S	acc_T_0.1	acc_T_0.2	acc_T_0.3	acc_T_0.4	acc_T_0.5	acc_T_0.6	acc_T_0.7	acc_T_0.8	acc_T_0.9	rec_T_0.1	rec_T_0.2	rec_T_0.3	rec_T_0.4	rec_T_0.5	rec_T_0.6	rec_T_0.7	rec_T_0.8	rec_T_0.9	spec_T_0.1	spec_T_0.2	spec_T_0.3	spec_T_0.4	spec_T_0.5	spec_T_0.6	spec_T_0.7	spec_T_0.8	spec_T_0.9	pres_T_0.1	pres_T_0.2	pres_T_0.3	pres_T_0.4	pres_T_0.5	pres_T_0.6	pres_T_0.7	pres_T_0.8	pres_T_0.9	f1_b_T_0.1	f1_b_T_0.2	f1_b_T_0.3	f1_b_T_0.4	f1_b_T_0.5	f1_b_T_0.6	f1_b_T_0.7	f1_b_T_0.8
80	Model3	2	2_5	0.866732	0.653838	0.152795	0.152795	0.429078	0.604098	0.708575	0.80975	0.86346	0.847205	0.847205	1	1	0.954268	0.883374	0.804893	0.686264	0.445554	0	0	0	0	0.334359	0.553731	0.691204	0.83202	0.938829	1	1	0.152795	0.152795	0.205437	0.26308	0.319771	0.424231	0.567781	0	0	0.265086	0.265086	0.338089	0.40542	0.457704	0.524333	0.499296	0
80	Model3	2	5	0.866347	0.651808	0.152795	0.152795	0.320919	0.589276	0.700499	0.824539	0.869006	0.847205	0.847205	1	1	0.980906	0.891859	0.807534	0.648681	0.345182	0	0	0	0	0.201889	0.534705	0.681195	0.856255	0.963478	1	1	0.152795	0.152795	0.18144	0.256887	0.313578	0.448694	0.630254	0	0	0.265086	0.265086	0.306236	0.398882	0.451739	0.530464	0.446062	0
80	Model2	2	2	0.543345	0.218124	0.152795	0.152795	0.152821	0.175682	0.588591	0.843429	0.846956	0.847183	0.847205	1	1	0.999957	0.976685	0.416931	0.00688828	0.000535179	5.17916e-05	0	0	0	3.89195e-05	0.0312196	0.61955	0.994301	0.999609	0.999964	1	0.152795	0.152795	0.152794	0.15385	0.165028	0.178964	0.198083	0.206897	0	0.265086	0.265086	0.265083	0.265826	0.236461	0.013266	0.00106747	0.000103557
80	Model1	2	2	0.50285	0.194462	0.152795	0.152795	0.847205	0.847205	0.847205	0.847205	0.847205	0.847205	0.847205	1	1	0	0	0	0	0	0	0	0	0	1	1	1	1	1	1	1	0.152795	0.152795	0	0	0	0	0	0	0	0.265086	0.265086	0	0	0	0	0	0
80	Model3	2	2	0.501765	0.194317	0.152795	0.152795	0.152795	0.152795	0.507152	0.847205	0.847205	0.847205	0.847205	1	1	1	1	0.48924	0	0	0	0	0	0	0	0	0.510382	1	1	1	1	0.152795	0.152795	0.152795	0.152795	0.152695	0	0	0	0	0.265086	0.265086	0.265086	0.265086	0.232748	0	0	0
80	Model1	2	10	0.838474	0.54367	0.322941	0.675631	0.764152	0.783009	0.791268	0.795959	0.799248	0.798991	0.794707	0.971161	0.79702	0.614101	0.489327	0.386261	0.296256	0.21938	0.135944	0.0477432	0.206033	0.653738	0.791214	0.835975	0.864311	0.886081	0.903828	0.918573	0.929423	0.180732	0.293351	0.346605	0.349818	0.339236	0.319274	0.291487	0.231419	0.108737	0.30475	0.428857	0.443112	0.407976	0.361225	0.307335	0.250345	0.171275
80	Model2	2	2_3_4_5	0.895615	0.703759	0.152795	0.377771	0.507872	0.607079	0.695587	0.795984	0.863494	0.872816	0.847205	1	0.98902	0.961597	0.917505	0.845316	0.735475	0.557933	0.222376	0	0	0.267531	0.426042	0.551093	0.668584	0.806897	0.918602	0.990124	1	0.152795	0.195831	0.232043	0.269334	0.315072	0.407199	0.552813	0.802405	0	0.265086	0.326929	0.373868	0.416426	0.459045	0.524182	0.555361	0.348241
80	Model1	2	5	0.843454	0.622478	0.45159	0.703635	0.796468	0.831257	0.84825	0.857241	0.862004	0.862613	0.855777	0.945179	0.810443	0.687205	0.578658	0.480349	0.388799	0.296187	0.200183	0.0865782	0.362571	0.684372	0.816174	0.876814	0.914601	0.941725	0.964049	0.982083	0.994503	0.210998	0.316516	0.402705	0.458636	0.503584	0.546129	0.597725	0.668329	0.739621	0.344984	0.455239	0.507824	0.511704	0.491692	0.454226	0.396098	0.308086
80	Model1	2	4	0.806036	0.532022	0.34406	0.480243	0.574982	0.652426	0.719639	0.776725	0.820985	0.848242	0.851584	0.959654	0.900163	0.833775	0.757167	0.66515	0.551589	0.415092	0.251923	0.0721025	0.233037	0.40451	0.528308	0.633536	0.729466	0.817329	0.894189	0.955789	0.992165	0.184115	0.214223	0.241731	0.271472	0.307202	0.352577	0.414352	0.506825	0.62401	0.308955	0.346084	0.374799	0.399654	0.420291	0.430181	0.414722	0.336556
80	Model2	2	4_5	0.884082	0.683017	0.152795	0.344091	0.528604	0.627352	0.698761	0.779398	0.852306	0.873499	0.847205	1	0.985196	0.943841	0.889624	0.821198	0.722397	0.562957	0.305415	0	0	0.228467	0.453715	0.580051	0.676679	0.789678	0.90449	0.975954	1	0.152795	0.187188	0.237573	0.276441	0.314162	0.382508	0.515276	0.696112	0	0.265086	0.314601	0.379598	0.42181	0.454463	0.500175	0.538062	0.424558
80	Model3	2	3	0.842769	0.562992	0.311266	0.420766	0.490019	0.587193	0.680016	0.749383	0.804982	0.850383	0.847205	0.991532	0.968709	0.944056	0.891548	0.811703	0.701016	0.551822	0.284128	0	0.188579	0.321943	0.408133	0.532302	0.656266	0.758106	0.85064	0.952507	1	0.180586	0.204872	0.223403	0.255838	0.298682	0.343256	0.399875	0.518992	0	0.305526	0.338216	0.361306	0.397586	0.436679	0.460853	0.463718	0.367219
80	Model2	2	4	0.828007	0.587553	0.21898	0.354312	0.464062	0.569178	0.674785	0.758856	0.821404	0.857294	0.854761	0.995503	0.968045	0.925912	0.857582	0.760343	0.638486	0.48552	0.312743	0.0603113	0.0789334	0.243625	0.380766	0.517163	0.659355	0.780564	0.881981	0.955504	0.998042	0.163128	0.187535	0.212394	0.242612	0.287016	0.34416	0.42593	0.559008	0.847423	0.280322	0.314201	0.345528	0.378224	0.416726	0.447245	0.453777	0.401092
80	Model2	2	2_4	0.830709	0.589154	0.238538	0.369719	0.484077	0.59271	0.688604	0.763013	0.82057	0.857922	0.858056	0.993379	0.965524	0.918083	0.848009	0.750192	0.635215	0.492192	0.319632	0.0965913	0.102402	0.262264	0.405804	0.546666	0.677496	0.786061	0.879793	0.955003	0.995387	0.166386	0.190963	0.21793	0.252262	0.295538	0.348742	0.424777	0.561616	0.790645	0.285031	0.318861	0.352246	0.38885	0.42403	0.450276	0.456007	0.4074
80	Model2	2	2_3_4	0.869	0.646437	0.336758	0.446102	0.5242	0.593784	0.671183	0.746557	0.826102	0.868458	0.847609	0.991938	0.970729	0.941199	0.900155	0.838661	0.74339	0.582534	0.330534	0.00290033	0.218595	0.351485	0.448994	0.53853	0.640979	0.747128	0.870029	0.965474	0.999953	0.186293	0.212573	0.235513	0.260244	0.296416	0.346488	0.447007	0.63324	0.918033	0.313675	0.348771	0.376752	0.403758	0.438019	0.472669	0.50585	0.434349
80	Model3	2	4	0.80801	0.536925	0.191391	0.342885	0.456864	0.561341	0.667152	0.749727	0.810537	0.84267	0.849783	0.99672	0.961942	0.912239	0.841941	0.740188	0.610087	0.454842	0.300054	0.0303067	0.0461492	0.231238	0.374737	0.510734	0.653979	0.774912	0.874687	0.940531	0.997576	0.158573	0.18412	0.208314	0.236847	0.278394	0.328332	0.395629	0.476433	0.692778	0.273615	0.309081	0.339176	0.369695	0.404609	0.426912	0.423174	0.368211
80	Model3	2	2_3	0.842807	0.562669	0.32819	0.424941	0.493583	0.609312	0.680016	0.747246	0.803432	0.844773	0.847205	0.989417	0.967225	0.942969	0.883374	0.811703	0.705479	0.558304	0.341703	0	0.208937	0.32714	0.412535	0.559885	0.656266	0.754779	0.847641	0.935503	1	0.184055	0.205878	0.2245	0.265781	0.298682	0.341609	0.39791	0.48862	0	0.310374	0.339493	0.362659	0.40862	0.436679	0.460321	0.464655	0.402164
80	Model2	2	3	0.849472	0.594735	0.356271	0.444684	0.514043	0.581366	0.657083	0.727072	0.806632	0.859117	0.847205	0.987328	0.964298	0.93003	0.884583	0.824487	0.734094	0.576578	0.345501	0	0.242459	0.350971	0.439019	0.52668	0.626891	0.725806	0.848122	0.951748	1	0.190321	0.21133	0.230176	0.252088	0.284967	0.325623	0.406413	0.56358	0	0.319126	0.346683	0.369021	0.392362	0.423544	0.451135	0.476767	0.428383
80	Model3	2	2_4	0.808007	0.53761	0.192384	0.337532	0.460672	0.553281	0.668245	0.751288	0.808717	0.840938	0.850216	0.996616	0.963763	0.91009	0.848052	0.738694	0.606893	0.460738	0.309791	0.0364181	0.0473401	0.22459	0.379619	0.500118	0.655539	0.777329	0.871475	0.936731	0.996986	0.158726	0.183113	0.209219	0.234284	0.278896	0.329557	0.392661	0.468953	0.685459	0.273838	0.307754	0.340224	0.367141	0.404915	0.427158	0.423984	0.373107
80	Model3	2	2_3_4	0.863086	0.623602	0.316518	0.440284	0.528818	0.610624	0.688439	0.753433	0.816885	0.858069	0.847205	0.991705	0.969866	0.93924	0.893732	0.823727	0.728224	0.57341	0.35245	0	0.194747	0.344774	0.454797	0.559565	0.664039	0.75798	0.860796	0.949258	1	0.181743	0.210707	0.237047	0.267919	0.306613	0.351772	0.426245	0.556091	0	0.30719	0.3462	0.378554	0.412255	0.446884	0.474388	0.488995	0.431449
80	Model2	2	2_3	0.849634	0.595169	0.357412	0.437162	0.505076	0.576231	0.656959	0.736802	0.8108	0.857604	0.847205	0.98713	0.967285	0.936564	0.889477	0.823667	0.716303	0.562232	0.358113	0	0.243841	0.341554	0.427256	0.519737	0.626893	0.740499	0.855629	0.947688	1	0.190572	0.209451	0.227748	0.250387	0.284765	0.332365	0.412577	0.552497	0	0.319468	0.34434	0.366398	0.390772	0.423213	0.454051	0.475917	0.434558
80	Model3	1	3	0.858013	0.681188	0.180763	0.369796	0.47225	0.59089	0.670402	0.788531	0.839543	0.819237	0.819237	1	0.985129	0.955386	0.897438	0.825616	0.675003	0.491866	0	0	0	0.234025	0.365647	0.523251	0.636154	0.813581	0.916257	1	1	0.180763	0.221048	0.249425	0.293461	0.333635	0.444117	0.564455	0	0	0.306179	0.361077	0.395576	0.442292	0.475228	0.535743	0.525667	0
80	Model3	1	3_5	0.911833	0.797478	0.38322	0.515172	0.611189	0.686204	0.752335	0.804452	0.842362	0.868288	0.854808	0.991359	0.972073	0.943181	0.904686	0.855985	0.793019	0.707324	0.562411	0.242207	0.249036	0.414358	0.537936	0.637996	0.729465	0.806975	0.872158	0.935778	0.989977	0.225575	0.268064	0.310532	0.35543	0.411119	0.47548	0.549712	0.658969	0.842075	0.367523	0.420241	0.467232	0.510354	0.555459	0.594505	0.618637	0.606873
80	Model1	2	7	0.854237	0.604395	0.348666	0.551896	0.66702	0.731036	0.766806	0.795308	0.819124	0.836293	0.840021	0.978101	0.912576	0.836805	0.767698	0.699454	0.617899	0.518848	0.389317	0.218284	0.235147	0.486847	0.636399	0.724424	0.778953	0.827303	0.87328	0.916905	0.952152	0.187411	0.242844	0.29332	0.334407	0.363333	0.392203	0.424771	0.457991	0.451386	0.314552	0.383607	0.434379	0.465879	0.478242	0.479837	0.467119	0.420871
80	Model2	1	2_4_5	0.916411	0.80293	0.393764	0.549794	0.652644	0.722574	0.776108	0.817601	0.850902	0.875404	0.863431	0.991072	0.968126	0.937007	0.897773	0.854081	0.799757	0.727252	0.607587	0.311858	0.261969	0.45749	0.5899	0.683916	0.758904	0.821538	0.878186	0.934497	0.985135	0.228573	0.282512	0.335168	0.38526	0.43872	0.497186	0.568463	0.671772	0.822346	0.371472	0.437389	0.493729	0.539154	0.579675	0.613177	0.638128	0.63807
80	Model3	3	2_3_4	0.900614	0.791781	0.389466	0.483298	0.557991	0.646881	0.712453	0.769194	0.821434	0.853257	0.840591	0.9919	0.974447	0.948714	0.911082	0.859605	0.784839	0.672327	0.51101	0.241866	0.241574	0.362725	0.462072	0.582023	0.676329	0.765353	0.858039	0.937276	0.987573	0.243033	0.272926	0.302143	0.348579	0.394663	0.450883	0.537602	0.666665	0.826923	0.390409	0.426419	0.458321	0.504237	0.54096	0.572735	0.597464	0.578551
80	Model1	1	2	0.848099	0.675094	0.377268	0.624782	0.689831	0.735242	0.771762	0.802224	0.826567	0.842868	0.842106	0.981189	0.845983	0.768864	0.701936	0.634305	0.561369	0.474975	0.361976	0.186346	0.244015	0.575975	0.672393	0.742591	0.802092	0.855368	0.904145	0.948976	0.986797	0.222623	0.305661	0.341169	0.375659	0.41424	0.461326	0.522295	0.610185	0.756943	0.362906	0.449069	0.472621	0.489402	0.501179	0.506454	0.497513	0.454394
80	Model1	2	9	0.822766	0.599577	0.409209	0.602009	0.725752	0.782517	0.813594	0.832937	0.846505	0.855409	0.856721	0.933223	0.857996	0.766403	0.688172	0.618952	0.550078	0.476241	0.378027	0.227503	0.314703	0.555842	0.718421	0.799532	0.848698	0.883951	0.913283	0.941506	0.970202	0.197173	0.258375	0.329255	0.382378	0.424556	0.460881	0.497605	0.538221	0.579291	0.325561	0.397153	0.460622	0.491602	0.503647	0.501545	0.486689	0.44412
80	Model3	1	3_4	0.875341	0.72208	0.335224	0.442142	0.521611	0.623735	0.698085	0.770641	0.826208	0.852542	0.819237	0.992141	0.972816	0.944147	0.896599	0.832936	0.736384	0.596144	0.410856	0	0.190277	0.32505	0.42838	0.563528	0.668331	0.7782	0.876971	0.949999	1	0.212819	0.241288	0.267101	0.311889	0.35655	0.422818	0.516712	0.644515	0	0.350462	0.386669	0.416401	0.462792	0.499347	0.537191	0.553594	0.50182
80	Model3	2	3_5	0.889347	0.687485	0.228722	0.429109	0.551271	0.64958	0.729146	0.790153	0.843428	0.871588	0.847205	0.998455	0.978765	0.945722	0.899783	0.834794	0.747231	0.617701	0.393452	0	0.0898993	0.329978	0.480131	0.604455	0.710092	0.797894	0.884138	0.957821	1	0.165178	0.20852	0.247037	0.290912	0.341812	0.400048	0.490191	0.62719	0	0.283462	0.343797	0.391745	0.439672	0.485027	0.521108	0.546608	0.483556
80	Model3	1	4	0.796723	0.609229	0.180763	0.256283	0.359999	0.527853	0.631549	0.747693	0.795916	0.831197	0.819237	1	0.986138	0.944714	0.837462	0.720778	0.525779	0.403923	0.23013	0	0	0.0952425	0.230983	0.459538	0.61186	0.796657	0.882408	0.963821	1	0.180763	0.19387	0.213254	0.254788	0.290651	0.36327	0.431145	0.583942	0	0.306179	0.324036	0.347961	0.390708	0.414256	0.429672	0.41709	0.330149
80	Model2	1	2_5	0.91636	0.805695	0.390919	0.548803	0.649041	0.719669	0.774147	0.816464	0.849828	0.87527	0.865106	0.991163	0.96805	0.936376	0.897561	0.853063	0.798184	0.725735	0.60833	0.320431	0.258477	0.456297	0.585641	0.680417	0.756735	0.820498	0.877209	0.934169	0.985287	0.227758	0.282051	0.332721	0.382601	0.436222	0.49524	0.565991	0.670941	0.827747	0.370401	0.436828	0.490982	0.536507	0.577258	0.611235	0.635985	0.638103
80	Model1	3	10	0.890642	0.806635	0.484695	0.64929	0.738554	0.78496	0.816091	0.838128	0.852953	0.860767	0.858399	0.962053	0.915902	0.866218	0.819662	0.770052	0.710857	0.636957	0.542294	0.403257	0.367508	0.583839	0.707214	0.776442	0.827393	0.869372	0.905978	0.93895	0.970132	0.271882	0.350769	0.420724	0.473705	0.52272	0.571902	0.624495	0.685596	0.76822	0.423952	0.507267	0.566364	0.600414	0.622726	0.633854	0.630665	0.605583
80	Model3	3	2_3_5	0.923388	0.836508	0.414906	0.563652	0.642948	0.708355	0.7651	0.813194	0.848692	0.867879	0.858151	0.992497	0.975127	0.950281	0.916094	0.871317	0.812815	0.728572	0.598178	0.350202	0.273114	0.462639	0.5675	0.657357	0.739025	0.813287	0.87818	0.934088	0.982848	0.251045	0.308189	0.350391	0.396261	0.450434	0.516602	0.594849	0.690203	0.833673	0.400729	0.468354	0.511996	0.553223	0.593865	0.631708	0.654954	0.640904
80	Model3	3	5	0.904507	0.812445	0.280696	0.491377	0.593838	0.709261	0.774287	0.813545	0.842129	0.85919	0.845144	0.995838	0.965353	0.935556	0.887247	0.831809	0.77236	0.687944	0.550789	0.268084	0.105135	0.375021	0.50995	0.665567	0.760165	0.823656	0.879979	0.9349	0.986807	0.214572	0.274936	0.31911	0.39441	0.459876	0.51812	0.584566	0.675009	0.833009	0.353068	0.427981	0.475896	0.546073	0.592294	0.620196	0.632056	0.606605
80	Model2	1	2	0.875742	0.729092	0.336404	0.43606	0.516883	0.620393	0.711659	0.789176	0.840754	0.862024	0.831865	0.992229	0.974596	0.945532	0.894177	0.823768	0.727332	0.605017	0.411894	0.0789743	0.191698	0.317233	0.422303	0.559983	0.686922	0.802822	0.892768	0.961345	0.997989	0.213128	0.239519	0.265321	0.309577	0.367315	0.448703	0.554551	0.701592	0.896516	0.350887	0.384534	0.414369	0.459922	0.508079	0.555011	0.578686	0.519057
80	Model3	3	3_5	0.919613	0.832289	0.419898	0.556086	0.646548	0.706321	0.762411	0.811833	0.846221	0.866053	0.858597	0.989651	0.969368	0.944141	0.913766	0.871221	0.809677	0.722989	0.600475	0.362764	0.280029	0.45463	0.573492	0.655396	0.735699	0.812362	0.876473	0.93125	0.980319	0.252305	0.303789	0.352093	0.394289	0.447274	0.514402	0.589631	0.68195	0.819005	0.402098	0.462603	0.512909	0.550875	0.59109	0.629116	0.649535	0.638625
80	Model3	3	4	0.852929	0.729732	0.197103	0.345917	0.449814	0.54996	0.703703	0.787423	0.828841	0.843691	0.802897	1	0.978112	0.942021	0.877049	0.743338	0.632362	0.514115	0.378233	0	0	0.19072	0.328982	0.469663	0.693973	0.825489	0.906103	0.957956	1	0.197103	0.228814	0.256304	0.288753	0.373549	0.470777	0.573405	0.688324	0	0.3293	0.370869	0.402969	0.434466	0.497227	0.539735	0.542144	0.4882
80	Model2	3	2_3_5	0.92589	0.842446	0.423746	0.530307	0.612836	0.69514	0.764097	0.817219	0.858018	0.878119	0.861699	0.992519	0.975066	0.950209	0.917186	0.874428	0.817359	0.736106	0.604172	0.363005	0.284118	0.421124	0.530014	0.640629	0.737012	0.817184	0.887946	0.94537	0.984123	0.253929	0.29254	0.331697	0.385198	0.449415	0.523259	0.617251	0.730817	0.848779	0.404396	0.450054	0.491739	0.542541	0.593697	0.638049	0.671459	0.661488
80	Model2	3	4	0.855929	0.733144	0.282338	0.395453	0.477421	0.561701	0.68723	0.769033	0.81746	0.842482	0.817981	0.994337	0.973563	0.942106	0.890432	0.780737	0.675452	0.562433	0.417489	0.0933513	0.107549	0.253533	0.363345	0.481001	0.664275	0.792006	0.880067	0.946813	0.995871	0.214773	0.242525	0.26647	0.29636	0.36342	0.443585	0.535151	0.65835	0.847332	0.353246	0.388316	0.415436	0.444708	0.495973	0.535497	0.548453	0.510957
80	Model2	2	3_4	0.868316	0.643594	0.369249	0.4679	0.539216	0.602468	0.673519	0.744975	0.816401	0.864619	0.859483	0.987587	0.963124	0.930901	0.890107	0.835432	0.751996	0.613661	0.394453	0.0957971	0.257731	0.378585	0.468575	0.550592	0.644318	0.743709	0.852965	0.949414	0.997215	0.19352	0.21846	0.240077	0.263193	0.297562	0.346054	0.429455	0.584428	0.861178	0.323626	0.356139	0.381712	0.40626	0.438824	0.473988	0.505293	0.471006
80	Model3	1	5	0.894064	0.768836	0.331741	0.49473	0.597183	0.685683	0.752101	0.796947	0.829531	0.852164	0.851722	0.990589	0.958878	0.922642	0.875893	0.828912	0.76914	0.689727	0.554887	0.257078	0.186368	0.392316	0.525371	0.643714	0.735153	0.803083	0.860378	0.917758	0.982929	0.211752	0.258251	0.300171	0.351676	0.408486	0.462893	0.521528	0.598184	0.768664	0.348918	0.40691	0.452973	0.501855	0.547276	0.577955	0.593949	0.575723
80	Model3	2	2_4_5	0.881235	0.680717	0.207259	0.430659	0.561772	0.649034	0.719697	0.779854	0.831041	0.868891	0.847205	0.99773	0.968381	0.927121	0.87886	0.81879	0.740706	0.629345	0.43031	0	0.0646966	0.33368	0.495881	0.607584	0.701825	0.786914	0.867417	0.94799	1	0.161347	0.207676	0.24907	0.287707	0.331214	0.385341	0.461233	0.598739	0	0.277775	0.342006	0.392654	0.433502	0.471641	0.506949	0.532332	0.500741
80	Model3	3	3_4	0.894535	0.784191	0.38087	0.472541	0.546092	0.638166	0.705053	0.770352	0.819573	0.850924	0.837562	0.990826	0.972728	0.945989	0.905269	0.858277	0.775397	0.666672	0.494111	0.214996	0.231131	0.34975	0.447921	0.572596	0.667438	0.769114	0.857108	0.938518	0.990395	0.240329	0.268597	0.296096	0.342089	0.387841	0.451888	0.533876	0.663631	0.84604	0.38683	0.420957	0.451022	0.496542	0.534259	0.571004	0.59293	0.56646
80	Model3	1	2_3_4	0.888949	0.743355	0.381824	0.47383	0.568175	0.638207	0.706492	0.771583	0.826306	0.856704	0.840741	0.991331	0.974588	0.948741	0.908685	0.849256	0.765815	0.64287	0.455873	0.14439	0.247337	0.36334	0.484204	0.578527	0.674992	0.772855	0.866781	0.945147	0.994388	0.225175	0.252483	0.288688	0.32236	0.365707	0.426576	0.515685	0.647111	0.850243	0.366991	0.401064	0.442676	0.475894	0.511256	0.547938	0.572296	0.534913
80	Model2	3	2_4	0.892158	0.779679	0.346591	0.456417	0.539468	0.633146	0.708878	0.776468	0.82716	0.854397	0.82828	0.992705	0.974204	0.946211	0.90572	0.848073	0.770049	0.65872	0.4736	0.15245	0.187976	0.329305	0.439617	0.566231	0.674707	0.778044	0.868511	0.947879	0.99419	0.230836	0.262853	0.293043	0.338882	0.390251	0.459955	0.551536	0.690464	0.86561	0.374572	0.414003	0.447495	0.493222	0.534531	0.575913	0.600381	0.561831
80	Model1	3	9	0.794693	0.572112	0.246812	0.425936	0.550256	0.662563	0.748215	0.761105	0.74691	0.740916	0.741348	0.993608	0.944357	0.84629	0.703849	0.505407	0.264223	0.116587	0.0506177	0.0276173	0.0634813	0.298668	0.477583	0.652428	0.807822	0.883085	0.901648	0.910378	0.916563	0.206636	0.248435	0.28453	0.332055	0.392324	0.35683	0.225411	0.121767	0.0751496	0.342122	0.393382	0.425877	0.451232	0.441743	0.303622	0.153685	0.0715094
80	Model3	2	3_4	0.863433	0.623731	0.346623	0.450825	0.537244	0.62373	0.693844	0.755669	0.810861	0.85103	0.860459	0.988433	0.966448	0.934087	0.884591	0.817651	0.725237	0.595698	0.412373	0.141909	0.230872	0.357832	0.465673	0.576684	0.671515	0.761157	0.849667	0.930143	0.990051	0.188164	0.213481	0.239707	0.273717	0.309832	0.353851	0.416788	0.515651	0.720074	0.316145	0.349712	0.38151	0.418072	0.44938	0.475635	0.490436	0.458265
80	Model1	2	3	0.84152	0.567832	0.377226	0.477806	0.57729	0.642364	0.699002	0.751173	0.798602	0.836553	0.855594	0.980518	0.951074	0.907276	0.853784	0.786265	0.69714	0.574998	0.400884	0.179717	0.268421	0.392451	0.517777	0.604234	0.683264	0.760918	0.838929	0.915126	0.977489	0.194666	0.220168	0.253353	0.280094	0.309251	0.344643	0.391664	0.459999	0.590136	0.32484	0.357562	0.396097	0.421809	0.443906	0.461256	0.465946	0.428412
80	Model3	1	3_4_5	0.913526	0.799111	0.419069	0.533596	0.613712	0.689265	0.752642	0.801331	0.839677	0.867769	0.862322	0.989595	0.969495	0.942918	0.906597	0.858639	0.80081	0.718874	0.576791	0.30823	0.293184	0.437416	0.541074	0.641311	0.729254	0.801446	0.866332	0.931973	0.984582	0.236013	0.275488	0.311932	0.358025	0.411681	0.470877	0.54268	0.65167	0.81519	0.381129	0.429057	0.468784	0.513331	0.556529	0.593044	0.618473	0.611948
80	Model3	3	2_4_5	0.924048	0.84091	0.431227	0.55723	0.643055	0.70995	0.767188	0.81319	0.848626	0.868792	0.862368	0.990131	0.971843	0.947276	0.913867	0.870066	0.814144	0.734	0.6121	0.379372	0.294022	0.455447	0.568372	0.65989	0.741933	0.812956	0.876766	0.931807	0.980939	0.256118	0.304646	0.350129	0.397455	0.452853	0.516568	0.593855	0.687843	0.830103	0.406965	0.463879	0.51128	0.553977	0.595671	0.632084	0.656532	0.647765
80	Model2	1	3_4	0.881757	0.737262	0.362616	0.443703	0.521901	0.619554	0.69625	0.7703	0.827713	0.857678	0.834879	0.989579	0.971435	0.942534	0.899525	0.84006	0.75385	0.631774	0.456164	0.100774	0.224278	0.32726	0.429089	0.55778	0.664518	0.77393	0.870947	0.946271	0.996857	0.219651	0.241628	0.267009	0.309784	0.355882	0.423885	0.51927	0.651968	0.876154	0.359504	0.386997	0.416133	0.460855	0.499961	0.542645	0.570024	0.536767
80	Model1	2	8	0.832437	0.557462	0.244574	0.375075	0.492347	0.56652	0.705801	0.779206	0.805776	0.822588	0.827449	0.98574	0.958437	0.915252	0.865739	0.761975	0.630165	0.529077	0.410198	0.251448	0.110903	0.269864	0.416076	0.512555	0.69567	0.806086	0.855679	0.896963	0.931332	0.166636	0.191425	0.220386	0.242607	0.311086	0.369519	0.398012	0.417925	0.397739	0.285079	0.319115	0.355234	0.379004	0.441801	0.465863	0.45428	0.414025
80	Model2	3	2	0.868862	0.73574	0.315305	0.426535	0.503609	0.605602	0.673677	0.752938	0.823567	0.844533	0.802897	0.993893	0.972552	0.943993	0.886118	0.82455	0.730859	0.591299	0.410043	0	0.148718	0.292493	0.395499	0.536738	0.63664	0.758358	0.880587	0.951196	1	0.222767	0.252312	0.277122	0.319529	0.35777	0.426111	0.548654	0.673478	0	0.363958	0.400675	0.428463	0.46969	0.499018	0.538349	0.569179	0.509736
80	Model1	1	4	0.792218	0.613382	0.227671	0.378824	0.495217	0.656652	0.715441	0.761827	0.79446	0.821373	0.832462	0.98477	0.931451	0.862495	0.685584	0.588709	0.49452	0.40825	0.308609	0.15256	0.0606188	0.256889	0.414178	0.650268	0.743404	0.820808	0.879676	0.934513	0.98248	0.187856	0.216651	0.2452	0.301938	0.336092	0.378467	0.428128	0.509757	0.657696	0.315522	0.351536	0.381845	0.419239	0.427898	0.428779	0.417953	0.384463
80	Model3	3	2_3	0.886118	0.760747	0.384643	0.469811	0.538693	0.630428	0.693629	0.756931	0.809375	0.845676	0.831198	0.990884	0.973018	0.947389	0.910173	0.853805	0.764786	0.649992	0.469424	0.185303	0.235817	0.346279	0.438362	0.561754	0.654307	0.755003	0.848502	0.938042	0.989759	0.241457	0.267611	0.292837	0.337681	0.377459	0.433853	0.51297	0.650344	0.816248	0.388295	0.419772	0.447387	0.492603	0.523489	0.553636	0.573409	0.545268
80	Model1	1	5	0.841149	0.647336	0.465365	0.659836	0.73626	0.77478	0.797394	0.810399	0.815813	0.813385	0.802636	0.94366	0.831886	0.732844	0.64477	0.558124	0.462938	0.353163	0.217761	0.0778886	0.359831	0.621873	0.737013	0.803467	0.850189	0.887066	0.917895	0.944808	0.962549	0.245426	0.326794	0.380752	0.419913	0.45116	0.474921	0.486938	0.465402	0.31455	0.389541	0.46925	0.501136	0.508597	0.498974	0.468853	0.4094	0.296698
80	Model3	1	2_4_5	0.910391	0.790906	0.429456	0.547117	0.625659	0.689303	0.747497	0.793454	0.831815	0.856598	0.854497	0.987456	0.965189	0.938188	0.904119	0.859337	0.801493	0.715658	0.581441	0.257414	0.306335	0.45487	0.556701	0.641905	0.72282	0.79168	0.857445	0.91731	0.986242	0.239022	0.280923	0.318324	0.357777	0.406201	0.459144	0.525549	0.608074	0.805	0.384881	0.435183	0.47536	0.512677	0.551644	0.583833	0.606045	0.594459
80	Model2	2	3_5	0.897102	0.708415	0.364604	0.480202	0.561177	0.632928	0.70284	0.788337	0.844643	0.877567	0.866086	0.992171	0.972404	0.943383	0.901665	0.843331	0.765643	0.656579	0.484596	0.151654	0.251421	0.391433	0.492246	0.584461	0.677502	0.79243	0.87856	0.948439	0.994934	0.192923	0.223709	0.250983	0.281268	0.320476	0.399487	0.493694	0.628949	0.84373	0.323033	0.363737	0.396484	0.428781	0.464454	0.525031	0.563604	0.547416
80	Model1	1	10	0.871834	0.710448	0.460322	0.622097	0.750379	0.795191	0.816063	0.827977	0.833475	0.829893	0.814629	0.957102	0.89555	0.79905	0.708781	0.624777	0.533083	0.423169	0.288246	0.109467	0.350709	0.56176	0.73964	0.814257	0.85827	0.893045	0.924008	0.949407	0.970221	0.245426	0.310771	0.403758	0.457104	0.49307	0.523752	0.551306	0.556952	0.447846	0.390673	0.461421	0.536449	0.555778	0.551165	0.528376	0.478813	0.379885
80	Model2	3	2_3_4	0.902323	0.795972	0.388969	0.477509	0.555628	0.63762	0.707725	0.777599	0.835558	0.862029	0.836484	0.992316	0.975299	0.94999	0.915184	0.865903	0.793036	0.68011	0.507414	0.204084	0.240853	0.355307	0.458816	0.569481	0.668894	0.773809	0.873718	0.949084	0.991732	0.242936	0.270808	0.301155	0.342908	0.390988	0.462568	0.56936	0.709849	0.858346	0.390315	0.42391	0.457332	0.498888	0.538722	0.584313	0.619827	0.591799
80	Model2	3	3_4_5	0.924176	0.840427	0.440341	0.551547	0.634282	0.705524	0.766128	0.816233	0.853513	0.876269	0.863745	0.988704	0.96819	0.944322	0.914996	0.875545	0.821874	0.748736	0.631319	0.381234	0.305723	0.449265	0.558171	0.654101	0.739267	0.814848	0.879235	0.936402	0.982197	0.259038	0.301467	0.344127	0.393714	0.451862	0.521465	0.603493	0.709042	0.840178	0.410521	0.459773	0.504431	0.550537	0.596088	0.63808	0.668314	0.667927
80	Model2	3	3	0.870213	0.739011	0.362711	0.445896	0.51198	0.587837	0.664421	0.736756	0.80492	0.843011	0.810697	0.990131	0.968773	0.938237	0.892551	0.836043	0.752304	0.619009	0.432802	0.0457542	0.208686	0.317534	0.407338	0.513033	0.622289	0.732939	0.85056	0.943713	0.998483	0.234988	0.258423	0.279867	0.310323	0.352071	0.408823	0.504181	0.653696	0.880991	0.379831	0.408009	0.431132	0.460529	0.495486	0.52976	0.555725	0.520794
80	Model2	3	2_5	0.920911	0.833348	0.384543	0.524906	0.603761	0.685618	0.759668	0.817851	0.854196	0.87186	0.851767	0.99222	0.972988	0.947838	0.913955	0.867795	0.804543	0.718448	0.591304	0.302183	0.235365	0.414906	0.519293	0.629563	0.733124	0.821118	0.887521	0.940733	0.986684	0.241595	0.289894	0.326167	0.377212	0.443905	0.524743	0.610598	0.710082	0.84782	0.388577	0.446698	0.485325	0.53402	0.587358	0.635195	0.660147	0.645273
80	Model2	1	3_4_5	0.917596	0.809728	0.403895	0.523398	0.618695	0.69538	0.761606	0.813245	0.854313	0.878236	0.865646	0.990696	0.972069	0.944714	0.908697	0.863564	0.80465	0.719697	0.584386	0.31838	0.274418	0.4244	0.54676	0.648312	0.739109	0.815141	0.884016	0.943073	0.986398	0.231519	0.27147	0.315025	0.363103	0.422084	0.489908	0.577908	0.693727	0.837788	0.375327	0.424414	0.472493	0.518872	0.567024	0.609018	0.641056	0.63438
80	Model1	3	5	0.585118	0.341834	0.266492	0.494641	0.59332	0.662278	0.723656	0.747647	0.769157	0.772484	0.773115	0.989054	0.687824	0.438884	0.282291	0.156396	0.0757567	0.0277187	0.00705701	0.00608212	0.0891094	0.447216	0.631232	0.755561	0.862912	0.912589	0.951173	0.960389	0.961415	0.210457	0.233987	0.226106	0.220884	0.218791	0.175435	0.122317	0.0419031	0.0372545	0.347064	0.349187	0.298454	0.24784	0.182405	0.105819	0.0451955	0.0120796
80	Model3	1	2	0.848319	0.672039	0.299893	0.417944	0.513279	0.586129	0.676323	0.750677	0.814707	0.845388	0.819237	0.992141	0.97454	0.940423	0.884107	0.786366	0.675634	0.521952	0.31282	0	0.14715	0.295132	0.41903	0.520381	0.652043	0.767235	0.879302	0.962897	1	0.204255	0.233754	0.26317	0.289132	0.332734	0.390415	0.488276	0.650388	0	0.338768	0.377065	0.411254	0.435757	0.467609	0.494869	0.504553	0.422451
80	Model2	2	2_5	0.873212	0.668115	0.250831	0.44997	0.575283	0.656267	0.70152	0.766568	0.827497	0.86199	0.864093	0.993845	0.955364	0.905921	0.852213	0.800948	0.736053	0.645918	0.506677	0.151214	0.116827	0.358822	0.515652	0.620927	0.683588	0.772072	0.860245	0.926072	0.992661	0.168711	0.211808	0.25224	0.288488	0.313437	0.368053	0.454608	0.552785	0.787963	0.288455	0.346742	0.394607	0.431056	0.450557	0.490726	0.533635	0.528727
80	Model2	2	5	0.873406	0.66829	0.253727	0.453952	0.575419	0.656158	0.701364	0.765821	0.826625	0.862174	0.865574	0.993552	0.954579	0.905506	0.852325	0.801353	0.736761	0.647084	0.505865	0.166674	0.120299	0.363664	0.515887	0.62078	0.683331	0.771062	0.859006	0.926434	0.991621	0.169223	0.212938	0.252245	0.288435	0.313372	0.367249	0.452867	0.553604	0.782026	0.28919	0.348202	0.394575	0.431011	0.450553	0.490167	0.532829	0.528659
80	Model2	3	2_3	0.892261	0.774908	0.383252	0.468715	0.54252	0.623812	0.69436	0.76755	0.826803	0.8557	0.832825	0.991494	0.973544	0.947882	0.910433	0.857469	0.776977	0.660141	0.479416	0.183197	0.233934	0.344784	0.443008	0.553449	0.654319	0.765236	0.867716	0.948074	0.992303	0.241119	0.26727	0.294668	0.333559	0.378474	0.448269	0.550578	0.693863	0.853857	0.387905	0.4194	0.449576	0.48824	0.525153	0.56853	0.600402	0.567042
80	Model1	1	9	0.864766	0.670402	0.429129	0.617032	0.705123	0.759099	0.787635	0.802533	0.808496	0.805957	0.795692	0.961585	0.891906	0.820667	0.740547	0.649727	0.547456	0.43203	0.296871	0.144115	0.311644	0.556382	0.679628	0.763193	0.818064	0.858815	0.891563	0.918286	0.939461	0.235608	0.307296	0.361109	0.408288	0.440708	0.461084	0.467828	0.444945	0.344374	0.37848	0.457102	0.501534	0.52637	0.525184	0.500571	0.449216	0.356129
80	Model3	2	3_4_5	0.894734	0.701533	0.350648	0.486591	0.586323	0.666369	0.728244	0.783167	0.833076	0.869233	0.867782	0.991757	0.968709	0.93646	0.895631	0.844194	0.771159	0.666739	0.49334	0.177395	0.235024	0.399641	0.523176	0.625022	0.707332	0.785333	0.863075	0.937025	0.992294	0.189507	0.22541	0.261557	0.301074	0.3422	0.393161	0.467575	0.585554	0.80589	0.31821	0.36572	0.408906	0.450656	0.486993	0.520801	0.549672	0.535506
80	Model3	3	2_3_4_5	0.925979	0.842128	0.42124	0.567894	0.646893	0.711209	0.767004	0.813682	0.849103	0.869574	0.861034	0.992529	0.975069	0.950398	0.917854	0.874861	0.818046	0.736527	0.609118	0.365146	0.280995	0.467937	0.572386	0.660479	0.740527	0.81261	0.87674	0.933513	0.98277	0.253107	0.310293	0.353009	0.398914	0.452868	0.5173	0.594632	0.692218	0.838775	0.403354	0.470773	0.514803	0.556126	0.596804	0.633806	0.658017	0.648015
80	Model3	3	2_4	0.889465	0.777051	0.344798	0.45542	0.523065	0.618609	0.693642	0.764457	0.81886	0.850839	0.831886	0.991601	0.971791	0.948884	0.904294	0.845121	0.757126	0.643193	0.47561	0.180407	0.186014	0.328656	0.418531	0.548476	0.656456	0.766257	0.861985	0.942954	0.991818	0.230211	0.262186	0.286025	0.329605	0.376523	0.442952	0.533595	0.671778	0.844061	0.37367	0.412957	0.439554	0.483119	0.520949	0.558914	0.58329	0.556924
80	Model2	3	2_4_5	0.924205	0.838961	0.41078	0.538624	0.625714	0.703929	0.766425	0.818955	0.855783	0.875031	0.858869	0.991787	0.972933	0.947501	0.915105	0.872919	0.816222	0.735101	0.611068	0.348094	0.268148	0.432005	0.546719	0.652087	0.740282	0.819625	0.885409	0.939831	0.98426	0.249634	0.296026	0.339128	0.392358	0.452085	0.526264	0.611623	0.713726	0.844453	0.398871	0.453936	0.499482	0.54923	0.595671	0.639929	0.667701	0.65842
80	Model1	3	4	0.848301	0.730579	0.482272	0.593001	0.691331	0.747528	0.783742	0.807982	0.827705	0.841456	0.840416	0.923331	0.839444	0.754815	0.692173	0.639742	0.584992	0.519151	0.430042	0.27728	0.373996	0.532501	0.675746	0.761117	0.819092	0.862724	0.903451	0.942454	0.978661	0.265833	0.305943	0.363651	0.415655	0.464704	0.511275	0.56897	0.647211	0.761331	0.412814	0.448446	0.490832	0.519404	0.538352	0.545655	0.54292	0.516736
80	Model2	1	3	0.865858	0.702395	0.360628	0.439533	0.497318	0.584892	0.662087	0.75206	0.820481	0.849298	0.821205	0.988952	0.968773	0.941253	0.893083	0.82803	0.727982	0.587815	0.428928	0.0125324	0.22199	0.322757	0.399364	0.516891	0.625472	0.757372	0.871818	0.942051	0.999636	0.219038	0.239907	0.256934	0.289718	0.327876	0.398327	0.502944	0.620234	0.88376	0.358642	0.384577	0.403676	0.437508	0.469746	0.514912	0.542077	0.50714
80	Model3	3	3_4_5	0.923895	0.839146	0.39595	0.552077	0.643457	0.710406	0.768827	0.815157	0.849267	0.868215	0.852031	0.993474	0.974508	0.949626	0.916581	0.871158	0.811728	0.725889	0.5966	0.298032	0.249264	0.448374	0.568295	0.659792	0.743705	0.815998	0.879556	0.934893	0.988033	0.245206	0.302497	0.350653	0.398096	0.454872	0.51992	0.596695	0.692263	0.859428	0.393332	0.461683	0.512181	0.555098	0.597672	0.633852	0.654982	0.640882
80	Model3	3	2	0.855313	0.712094	0.30328	0.447749	0.495657	0.580256	0.66218	0.754425	0.803764	0.837533	0.802897	0.992305	0.962015	0.943308	0.893559	0.79871	0.68252	0.562931	0.376938	0	0.134131	0.321502	0.385763	0.503344	0.628663	0.772077	0.862886	0.950605	1	0.219565	0.258199	0.273788	0.306362	0.345561	0.423673	0.501961	0.651974	0	0.359569	0.407128	0.424398	0.456284	0.482408	0.522812	0.530701	0.477696
80	Model3	2	4_5	0.882334	0.682971	0.320465	0.479194	0.583196	0.661699	0.726745	0.781572	0.829296	0.863486	0.87134	0.987518	0.956305	0.918989	0.87614	0.822346	0.754663	0.656665	0.499374	0.247633	0.200161	0.393146	0.522636	0.623024	0.709504	0.786426	0.86043	0.929154	0.983827	0.182118	0.221308	0.25772	0.295358	0.337987	0.389227	0.459032	0.559714	0.73414	0.307523	0.359435	0.402549	0.441785	0.479073	0.513573	0.540344	0.527825
80	Model3	1	2_3_5	0.916136	0.802785	0.433868	0.543495	0.623517	0.695853	0.752855	0.802271	0.8404	0.867556	0.861659	0.990944	0.971906	0.945217	0.909399	0.863373	0.805185	0.724925	0.58728	0.299282	0.31095	0.448967	0.552535	0.648735	0.728469	0.801628	0.865879	0.929398	0.985747	0.240883	0.280149	0.317914	0.36356	0.412312	0.472462	0.543921	0.647314	0.822474	0.387557	0.43493	0.475799	0.519453	0.558098	0.5955	0.621513	0.615838
80	Model2	2	2_3_5	0.896481	0.70671	0.379978	0.489474	0.56569	0.636279	0.704274	0.784667	0.839234	0.874709	0.867252	0.990306	0.969175	0.940897	0.899507	0.840888	0.764918	0.665081	0.505002	0.162962	0.269905	0.40296	0.498021	0.588805	0.679635	0.788228	0.870643	0.941386	0.994271	0.196548	0.226464	0.252642	0.282911	0.32129	0.394463	0.481129	0.608434	0.836872	0.327998	0.367139	0.398328	0.43044	0.464935	0.520505	0.558344	0.551914
80	Model1	3	3	0.863678	0.722069	0.425311	0.514567	0.590628	0.683953	0.732735	0.775187	0.811171	0.83547	0.830916	0.976022	0.943632	0.895265	0.833948	0.76877	0.69013	0.590143	0.449981	0.211091	0.290117	0.409236	0.515842	0.64713	0.723889	0.796068	0.865431	0.930103	0.983076	0.252351	0.281673	0.312214	0.367159	0.406004	0.453781	0.51844	0.612466	0.753819	0.401018	0.433844	0.462972	0.509849	0.531377	0.547539	0.551973	0.518798
80	Model2	1	2_3_4_5	0.921467	0.815413	0.423742	0.552597	0.638406	0.71468	0.776253	0.822984	0.858935	0.881382	0.868664	0.990752	0.97187	0.945707	0.910976	0.866119	0.809064	0.73165	0.609814	0.338783	0.298633	0.460085	0.570601	0.671368	0.756424	0.826055	0.88702	0.941303	0.985581	0.237623	0.28427	0.327031	0.379514	0.439647	0.506488	0.588291	0.696265	0.838299	0.383312	0.439877	0.486001	0.535809	0.583238	0.62298	0.652186	0.650178
80	Model3	1	4_5	0.900362	0.77743	0.339668	0.506716	0.608328	0.676681	0.736417	0.786307	0.82491	0.852492	0.850538	0.990425	0.96113	0.926031	0.887531	0.841261	0.78071	0.693163	0.561373	0.235865	0.19608	0.406451	0.538227	0.630158	0.713283	0.787542	0.853979	0.916726	0.986164	0.213735	0.263239	0.306751	0.346192	0.392985	0.447759	0.511579	0.597982	0.78998	0.351596	0.413286	0.460845	0.498095	0.535717	0.569115	0.588687	0.5791
80	Model3	3	4_5	0.91824	0.833803	0.380973	0.535966	0.632441	0.710723	0.766559	0.810459	0.843882	0.863179	0.858594	0.990673	0.967139	0.939891	0.903294	0.858246	0.801725	0.720795	0.598663	0.358702	0.231298	0.430117	0.556965	0.663449	0.744051	0.812603	0.874098	0.928115	0.981312	0.24034	0.294093	0.342453	0.397187	0.451506	0.512258	0.584277	0.671533	0.824933	0.386833	0.451033	0.502	0.55176	0.59172	0.625107	0.645396	0.633008
80	Model2	1	3_5	0.91655	0.808204	0.400025	0.518623	0.612802	0.689463	0.758627	0.810259	0.852003	0.876941	0.865146	0.990728	0.971523	0.944179	0.907527	0.861736	0.80273	0.71618	0.58202	0.3162	0.269687	0.418692	0.539685	0.641348	0.735877	0.81192	0.881972	0.942014	0.98627	0.23037	0.269412	0.311571	0.358285	0.418568	0.484995	0.572443	0.688929	0.835564	0.373818	0.421844	0.468531	0.513746	0.563452	0.604663	0.636295	0.630978
80	Model3	2	2_3_4_5	0.893987	0.698976	0.357988	0.490437	0.592137	0.668594	0.729928	0.783844	0.829806	0.866261	0.867542	0.990971	0.967855	0.935295	0.894181	0.839973	0.768129	0.669164	0.507695	0.178327	0.243829	0.404334	0.530248	0.62791	0.710081	0.786678	0.858778	0.930929	0.991842	0.191169	0.226629	0.264212	0.302362	0.343197	0.393722	0.460793	0.570011	0.797676	0.320509	0.367261	0.412029	0.451912	0.487294	0.520599	0.545766	0.537051
80	Model3	1	2_3	0.8826	0.729275	0.39097	0.474441	0.563051	0.6351	0.70288	0.774101	0.825059	0.854101	0.841894	0.989822	0.973183	0.947488	0.902231	0.845005	0.755674	0.638471	0.453043	0.156707	0.258834	0.364395	0.478226	0.576159	0.67152	0.778167	0.866229	0.942593	0.993079	0.227604	0.252524	0.286057	0.319585	0.362086	0.429105	0.512937	0.635209	0.83322	0.370105	0.400997	0.439442	0.471986	0.506945	0.547382	0.568861	0.52888
80	Model1	3	2	0.850599	0.715879	0.376301	0.670693	0.737872	0.779383	0.808564	0.828434	0.837993	0.835301	0.816989	0.977698	0.814415	0.713774	0.629213	0.547084	0.462353	0.366967	0.250421	0.0912372	0.228663	0.635411	0.743788	0.816248	0.872755	0.918303	0.953625	0.978883	0.995154	0.237321	0.354161	0.406142	0.456705	0.513494	0.581471	0.660162	0.744323	0.822134	0.381934	0.49365	0.517706	0.529256	0.529757	0.515115	0.471718	0.374758
80	Model1	3	8	0.873922	0.713293	0.343959	0.546528	0.661686	0.711495	0.7418	0.762135	0.784975	0.787061	0.766501	0.979842	0.92165	0.851348	0.786849	0.718571	0.635958	0.533662	0.383743	0.143021	0.187856	0.454439	0.615126	0.692996	0.747502	0.79311	0.846669	0.886072	0.919559	0.228503	0.293147	0.351924	0.386198	0.41129	0.430073	0.460748	0.45262	0.303852	0.370584	0.444814	0.497992	0.518103	0.523146	0.513134	0.494532	0.415345
80	Model1	1	3	0.854988	0.68774	0.487185	0.617249	0.68533	0.73911	0.782753	0.817598	0.841567	0.849835	0.835536	0.953239	0.890401	0.830645	0.765177	0.688242	0.594791	0.476436	0.320144	0.118264	0.384352	0.556978	0.653267	0.733358	0.803607	0.86676	0.922133	0.96671	0.9938	0.254643	0.307223	0.345802	0.3877	0.43606	0.496217	0.574476	0.679688	0.808023	0.40192	0.456824	0.488316	0.514641	0.533869	0.541051	0.520883	0.435269
80	Model2	1	2_3_5	0.922757	0.819673	0.429891	0.557739	0.642349	0.71736	0.777293	0.824063	0.860582	0.882705	0.871872	0.990688	0.971862	0.945787	0.911211	0.867452	0.811463	0.733255	0.613263	0.360846	0.306153	0.466363	0.575396	0.674587	0.7574	0.826843	0.888677	0.942157	0.984629	0.239569	0.286654	0.329526	0.381895	0.441015	0.508361	0.592393	0.70054	0.838185	0.385836	0.442725	0.488761	0.538219	0.584744	0.625108	0.65534	0.654003
80	Model2	3	3_5	0.922407	0.837922	0.393122	0.512866	0.593429	0.678069	0.755484	0.811764	0.855171	0.875512	0.857812	0.992516	0.974568	0.948681	0.91347	0.868045	0.810504	0.726776	0.589056	0.337014	0.245977	0.399523	0.506217	0.62028	0.727851	0.812073	0.88669	0.945834	0.985663	0.244221	0.284911	0.32049	0.371291	0.439152	0.514272	0.611589	0.7275	0.8523	0.391988	0.440921	0.47912	0.527979	0.583238	0.629268	0.664226	0.650999
80	Model3	1	2_5	0.908936	0.787869	0.406554	0.53447	0.619528	0.691766	0.745054	0.794243	0.831963	0.856595	0.850031	0.98922	0.967843	0.938471	0.901764	0.856588	0.797039	0.710218	0.5693	0.21452	0.27799	0.438848	0.549154	0.645431	0.720444	0.793626	0.858826	0.919986	0.990255	0.232132	0.275656	0.314738	0.359453	0.403372	0.460091	0.526074	0.61088	0.829265	0.376025	0.429098	0.471386	0.514014	0.548467	0.583409	0.604432	0.589357
80	Model1	3	7	0.842303	0.705095	0.34728	0.560214	0.691766	0.781662	0.813061	0.827661	0.833101	0.823897	0.805645	0.971942	0.911638	0.812533	0.691578	0.572069	0.449523	0.3312	0.20714	0.0533233	0.193932	0.473943	0.662118	0.803777	0.872223	0.92049	0.956312	0.975304	0.990333	0.228399	0.298455	0.371208	0.463869	0.523601	0.581225	0.650481	0.673106	0.57521	0.36988	0.44969	0.509603	0.555286	0.546763	0.50696	0.438919	0.316791
80	Model3	3	2_5	0.919372	0.832463	0.428281	0.549349	0.633785	0.702781	0.762162	0.809363	0.845574	0.865408	0.859475	0.989509	0.970523	0.945855	0.91068	0.864044	0.806577	0.727285	0.597814	0.370119	0.290504	0.445955	0.557174	0.651743	0.737151	0.810047	0.874613	0.9311	0.979607	0.255053	0.300712	0.343985	0.390968	0.446591	0.51038	0.587445	0.68051	0.816697	0.405568	0.459157	0.504497	0.54707	0.588836	0.625169	0.649928	0.636487
80	Model2	3	5	0.905811	0.81315	0.308363	0.502554	0.594722	0.66967	0.747812	0.802845	0.841044	0.858479	0.847414	0.99348	0.962938	0.931659	0.892053	0.844499	0.776988	0.690924	0.57856	0.287234	0.140173	0.389534	0.512008	0.615077	0.724076	0.809192	0.877897	0.927197	0.984933	0.220971	0.27914	0.319117	0.362619	0.429013	0.499915	0.581435	0.66112	0.823938	0.36153	0.432814	0.475399	0.515633	0.56898	0.608391	0.631469	0.61709
80	Model1	1	8	0.867227	0.705143	0.453635	0.653253	0.752798	0.793178	0.814202	0.824666	0.826959	0.818707	0.802025	0.950226	0.871702	0.781612	0.691191	0.592253	0.4873	0.36718	0.219254	0.0650649	0.344064	0.605052	0.74644	0.815681	0.863174	0.899105	0.928408	0.950975	0.964633	0.242219	0.327504	0.404818	0.452781	0.488511	0.515896	0.530882	0.496677	0.288725	0.386035	0.476125	0.533383	0.547143	0.535403	0.50119	0.434111	0.304215
80	Model3	1	2_3_4_5	0.915854	0.802133	0.39299	0.524281	0.613403	0.689186	0.754194	0.805091	0.843448	0.86914	0.854371	0.993015	0.975662	0.948948	0.910836	0.86166	0.800275	0.711774	0.558855	0.237801	0.260596	0.424685	0.539366	0.640279	0.730482	0.806153	0.872502	0.937604	0.990416	0.228591	0.272299	0.312504	0.358437	0.413634	0.476692	0.551929	0.664006	0.845552	0.371632	0.425769	0.470173	0.514432	0.558948	0.597486	0.621742	0.606909
80	Model3	2	2_3_5	0.889273	0.690399	0.365881	0.503113	0.597353	0.675233	0.738222	0.787505	0.828618	0.862685	0.871952	0.98934	0.965179	0.930012	0.882502	0.824703	0.755751	0.669648	0.527765	0.259821	0.253439	0.419779	0.537358	0.637851	0.722626	0.793232	0.857289	0.923089	0.982351	0.192898	0.230774	0.26608	0.305309	0.349055	0.397298	0.458366	0.553087	0.726404	0.322848	0.372487	0.413777	0.453668	0.490505	0.520808	0.54422	0.540129
80	Model2	1	2_3_4	0.896929	0.763712	0.379696	0.475143	0.566108	0.645926	0.720839	0.790665	0.843973	0.86793	0.842062	0.992149	0.975191	0.94817	0.910457	0.858296	0.781293	0.663931	0.477306	0.147468	0.24456	0.364808	0.481807	0.587558	0.69051	0.792732	0.883698	0.954121	0.995323	0.224677	0.253036	0.287614	0.327539	0.379619	0.454067	0.557446	0.696557	0.874323	0.366384	0.401813	0.44135	0.481762	0.52641	0.574342	0.606047	0.566456
80	Model2	3	2_3_4_5	0.926921	0.8447	0.419108	0.535157	0.61972	0.700426	0.766952	0.819107	0.857376	0.878949	0.861241	0.992258	0.974324	0.949733	0.916891	0.874877	0.819004	0.744072	0.621386	0.357563	0.278406	0.427346	0.538705	0.647285	0.740458	0.819132	0.885191	0.942178	0.98489	0.252377	0.294623	0.335736	0.389558	0.452808	0.526431	0.61405	0.725136	0.853138	0.402403	0.452435	0.496098	0.546799	0.596755	0.640907	0.672837	0.669264
80	Model2	2	2_4_5	0.886544	0.687401	0.304971	0.486905	0.596529	0.668287	0.732651	0.782113	0.828294	0.864328	0.872038	0.991782	0.959076	0.913448	0.866162	0.812713	0.752082	0.669484	0.529456	0.233709	0.181103	0.401749	0.539372	0.6326	0.718212	0.787529	0.856935	0.924722	0.987161	0.17927	0.224281	0.263431	0.298337	0.342173	0.389644	0.457691	0.559175	0.766519	0.303653	0.363547	0.40893	0.44381	0.481586	0.513336	0.54369	0.54391
80	Model2	1	4_5	0.907275	0.790926	0.345516	0.518485	0.623002	0.693109	0.75403	0.802795	0.838804	0.863483	0.856689	0.991215	0.963201	0.931247	0.895087	0.849527	0.788661	0.707376	0.580299	0.265117	0.203044	0.42036	0.554988	0.648543	0.732959	0.805914	0.867804	0.925967	0.987217	0.215336	0.268286	0.315881	0.359772	0.412434	0.472738	0.541426	0.633635	0.82067	0.353809	0.419677	0.471745	0.513248	0.555285	0.591138	0.613374	0.605796
80	Model2	2	3_4_5	0.901825	0.720017	0.410817	0.515251	0.586993	0.652061	0.723017	0.79268	0.843526	0.877532	0.877787	0.987674	0.965282	0.937462	0.90037	0.849312	0.779472	0.683295	0.538995	0.262928	0.30678	0.434088	0.523786	0.607278	0.700239	0.795063	0.872424	0.938588	0.988678	0.204428	0.235256	0.262011	0.292526	0.338182	0.406866	0.491341	0.612837	0.807251	0.338744	0.378311	0.409556	0.441584	0.483745	0.534654	0.571634	0.573549
80	Model2	3	4_5	0.917896	0.830298	0.368846	0.524421	0.611438	0.69385	0.756892	0.810462	0.847718	0.866528	0.853387	0.992006	0.969414	0.941731	0.908256	0.864589	0.805192	0.721014	0.595962	0.316034	0.215866	0.41518	0.530354	0.641216	0.730454	0.811756	0.878823	0.93295	0.985302	0.236973	0.289233	0.329874	0.38327	0.440537	0.512208	0.59361	0.685731	0.840723	0.382559	0.445537	0.488599	0.539063	0.583673	0.626121	0.651138	0.637703
80	Model2	1	2_3	0.8927	0.753095	0.382459	0.473405	0.55657	0.638734	0.716856	0.787701	0.841122	0.865407	0.839896	0.991718	0.97468	0.947919	0.90892	0.85458	0.774963	0.655705	0.46623	0.132516	0.248028	0.362801	0.47022	0.579119	0.686468	0.790511	0.882034	0.953485	0.995978	0.225404	0.252341	0.28305	0.322724	0.375549	0.449413	0.550855	0.688628	0.879081	0.36732	0.400893	0.43593	0.476323	0.521794	0.568908	0.598724	0.556015
80	Model1	1	7	0.85224	0.724163	0.380485	0.530773	0.775669	0.826412	0.845212	0.852482	0.851689	0.842722	0.823706	0.973343	0.912792	0.739258	0.623832	0.5218	0.429276	0.324805	0.200986	0.0503452	0.249672	0.446482	0.783703	0.871111	0.916571	0.945862	0.967944	0.98432	0.994346	0.222533	0.266789	0.429916	0.516429	0.579837	0.636307	0.690949	0.738784	0.662709	0.362247	0.412897	0.543664	0.565072	0.54929	0.512679	0.441886	0.316003
80	Model2	1	4	0.818611	0.648608	0.207975	0.309804	0.424487	0.532135	0.663665	0.761478	0.822311	0.843872	0.819237	0.998659	0.983756	0.942578	0.870329	0.734979	0.598835	0.448976	0.290952	0	0.0335132	0.161099	0.310171	0.457514	0.64793	0.797365	0.904686	0.965872	1	0.185663	0.205559	0.231651	0.261443	0.31536	0.394698	0.50965	0.65291	0	0.313114	0.340061	0.371902	0.402098	0.441349	0.475795	0.477393	0.402528
80	Model2	1	2_4	0.886489	0.74926	0.336525	0.449144	0.54475	0.636317	0.712696	0.785549	0.841844	0.865504	0.833189	0.992991	0.974153	0.94358	0.901732	0.843512	0.75644	0.624833	0.429611	0.0882778	0.191677	0.333302	0.456749	0.577754	0.683832	0.791972	0.889727	0.961683	0.997552	0.213253	0.2438	0.277063	0.320285	0.370543	0.445162	0.555604	0.712138	0.888344	0.351103	0.389996	0.428349	0.47268	0.514898	0.560482	0.588189	0.535919
80	Model3	1	2_4	0.868899	0.707796	0.323304	0.458315	0.538401	0.605847	0.676474	0.740355	0.802078	0.846374	0.829269	0.990892	0.966813	0.942407	0.898076	0.82293	0.725855	0.592604	0.367627	0.0647216	0.176003	0.346116	0.449259	0.541368	0.644158	0.743555	0.848298	0.952008	0.997964	0.209697	0.24599	0.27408	0.301707	0.337869	0.384438	0.462923	0.62828	0.875216	0.346142	0.392193	0.424658	0.451675	0.479054	0.502653	0.519797	0.463844
80	Model2	1	5	0.899401	0.780485	0.300013	0.484133	0.570825	0.676787	0.74073	0.801823	0.835879	0.859012	0.843692	0.992656	0.959577	0.927974	0.887819	0.840196	0.771866	0.687891	0.560682	0.171774	0.147183	0.379227	0.49202	0.630224	0.718783	0.808433	0.868532	0.924838	0.991949	0.204346	0.254328	0.287281	0.346305	0.397311	0.470629	0.535857	0.622065	0.824799	0.338922	0.402086	0.438738	0.498258	0.539503	0.584731	0.60243	0.589781
80	Model2	3	3_4	0.895387	0.786947	0.374536	0.465562	0.537899	0.621555	0.69316	0.766999	0.828404	0.858239	0.833787	0.991878	0.973316	0.946896	0.911753	0.86084	0.77968	0.662808	0.481799	0.185002	0.222984	0.340913	0.437494	0.550314	0.651996	0.763886	0.869056	0.950651	0.993057	0.238602	0.266072	0.292409	0.332327	0.377822	0.44771	0.554092	0.705601	0.867394	0.38467	0.417903	0.446833	0.487107	0.525154	0.568801	0.603594	0.572609
80	Model3	3	3	0.864027	0.717783	0.197103	0.381127	0.495236	0.569733	0.687849	0.771371	0.829696	0.831272	0.802897	1	0.985029	0.952532	0.910499	0.829211	0.698715	0.498482	0.214498	0	0	0.232875	0.382974	0.486078	0.653146	0.789207	0.911006	0.982684	1	0.197103	0.239672	0.274823	0.3031	0.369834	0.448649	0.578957	0.752539	0	0.3293	0.385537	0.426573	0.4548	0.511524	0.546431	0.535714	0.333841
30	Model3	1	3	0.806024	0.49085	0.211638	0.316667	0.406222	0.508267	0.604904	0.730432	0.792232	0.865427	0.871829	0.992749	0.969588	0.933763	0.868303	0.769971	0.611217	0.451321	0.173649	0	0.0968037	0.220679	0.328666	0.455337	0.580637	0.747958	0.84235	0.967128	1	0.139111	0.154624	0.169768	0.18987	0.212551	0.262818	0.296206	0.437131	0	0.244027	0.266715	0.287301	0.311602	0.333139	0.36758	0.35767	0.248559
30	Model3	1	3_5	0.900962	0.705366	0.323044	0.467265	0.583236	0.663239	0.729919	0.789429	0.842304	0.88234	0.886651	0.991727	0.969422	0.93726	0.899319	0.853369	0.790093	0.697323	0.534961	0.186672	0.224738	0.393442	0.531189	0.628532	0.71177	0.789331	0.863618	0.93341	0.989557	0.158293	0.190259	0.227151	0.262492	0.303265	0.355405	0.429121	0.541507	0.724366	0.27301	0.318089	0.365678	0.406373	0.4475	0.490272	0.531293	0.538214
30	Model2	1	2_4_5	0.910053	0.725993	0.297345	0.482048	0.595247	0.675451	0.745693	0.808883	0.858683	0.890915	0.887547	0.994308	0.97105	0.941275	0.904851	0.858159	0.796129	0.704405	0.554247	0.180018	0.194882	0.410158	0.544376	0.641726	0.729159	0.810758	0.881364	0.94041	0.991564	0.153661	0.194864	0.232962	0.270762	0.317784	0.382135	0.466068	0.57759	0.758279	0.266185	0.324592	0.373487	0.416803	0.463814	0.516402	0.560971	0.565678
30	Model3	3	2_3_4	0.850661	0.618139	0.25312	0.363843	0.461938	0.55987	0.666421	0.751442	0.819606	0.86613	0.861433	0.992117	0.971461	0.938027	0.885179	0.807394	0.717974	0.572344	0.346803	0.0328421	0.131231	0.263623	0.383412	0.506214	0.643169	0.756963	0.860389	0.951788	0.9981	0.158502	0.178709	0.200591	0.228202	0.271776	0.327621	0.403403	0.542636	0.740358	0.273335	0.301883	0.330506	0.362858	0.406664	0.449932	0.473249	0.42316
30	Model1	1	2	0.824983	0.557033	0.205864	0.339459	0.44873	0.546128	0.640083	0.779259	0.846223	0.876774	0.872134	0.991451	0.966323	0.928582	0.876824	0.805939	0.66503	0.490426	0.277431	0.0102741	0.0903714	0.247301	0.378185	0.497511	0.615699	0.796052	0.89853	0.964885	0.998839	0.138108	0.158772	0.18002	0.204159	0.235656	0.324041	0.415391	0.53736	0.565449	0.242443	0.272732	0.301575	0.331202	0.36468	0.435756	0.449801	0.365935
30	Model3	1	3_4	0.805862	0.487545	0.128171	0.272671	0.375465	0.491204	0.607682	0.739518	0.809903	0.873006	0.871829	1	0.981099	0.946881	0.88109	0.76984	0.596412	0.399967	0.08474	0	0	0.168522	0.29146	0.433886	0.583843	0.760557	0.870169	0.988892	1	0.128171	0.147825	0.164206	0.186204	0.21381	0.268035	0.311722	0.528636	0	0.227219	0.256937	0.279876	0.307437	0.334671	0.369853	0.350373	0.146066
30	Model3	2	3_4	0.813975	0.416105	0.102497	0.284308	0.407683	0.508626	0.633879	0.749208	0.830052	0.897492	0.897503	1	0.980847	0.941741	0.884709	0.787079	0.629596	0.426704	0.000288889	0	0	0.204762	0.346693	0.465676	0.616384	0.762868	0.876115	0.999955	1	0.102497	0.123466	0.141352	0.159021	0.189832	0.232665	0.282307	0.422535	0	0.185936	0.219324	0.24581	0.269586	0.305889	0.33977	0.339802	0.000577384
30	Model3	1	4	0.524568	0.211801	0.128171	0.128171	0.128171	0.128171	0.652894	0.849373	0.871829	0.871829	0.871829	1	1	1	1	0.329771	0.0423374	0	0	0	0	0	0	0	0.700397	0.968018	1	1	1	0.128171	0.128171	0.128171	0.128171	0.139279	0.162909	0	0	0	0.227219	0.227219	0.227219	0.227219	0.195844	0.0672084	0	0
30	Model2	1	2_5	0.910271	0.725638	0.306531	0.490928	0.600284	0.678094	0.749612	0.811003	0.858769	0.890569	0.88927	0.993349	0.969256	0.94023	0.904998	0.859501	0.79766	0.707544	0.562482	0.205978	0.205559	0.420607	0.550307	0.644736	0.733456	0.812965	0.881001	0.938802	0.989724	0.155279	0.197391	0.235112	0.272464	0.321603	0.385364	0.466414	0.574691	0.746625	0.268574	0.327987	0.376161	0.418832	0.468067	0.519667	0.562215	0.568521
30	Model1	3	10	0.853675	0.667847	0.300001	0.398631	0.525115	0.683971	0.773138	0.822021	0.857684	0.876543	0.871266	0.976189	0.957156	0.912909	0.846019	0.77556	0.698002	0.58769	0.43838	0.176169	0.188472	0.306509	0.461153	0.657243	0.772738	0.842476	0.902216	0.948813	0.985914	0.165558	0.185434	0.218407	0.289326	0.360153	0.422252	0.497815	0.585508	0.673507	0.283102	0.310679	0.352484	0.431191	0.491886	0.526189	0.539032	0.501373
30	Model3	3	2_3_5	0.912334	0.751289	0.343622	0.48716	0.594187	0.688421	0.753245	0.808868	0.856286	0.887637	0.883041	0.992779	0.973439	0.946544	0.913675	0.872185	0.813635	0.724352	0.577374	0.262404	0.236551	0.406953	0.53607	0.651268	0.733627	0.808082	0.878047	0.938811	0.985409	0.176605	0.213053	0.251788	0.301743	0.350674	0.411507	0.494864	0.608817	0.747868	0.299867	0.349592	0.397767	0.453663	0.500226	0.546576	0.58801	0.592679
30	Model3	3	5	0.892027	0.724981	0.246608	0.388306	0.54745	0.662831	0.758359	0.812741	0.857076	0.882625	0.876664	0.996002	0.974832	0.931171	0.883862	0.832292	0.767687	0.665452	0.527833	0.195093	0.123004	0.291565	0.48416	0.626374	0.746165	0.820172	0.888683	0.941143	0.989082	0.157767	0.184979	0.22943	0.280671	0.350992	0.413189	0.496475	0.596642	0.746659	0.272388	0.310953	0.368151	0.42605	0.493758	0.537228	0.568677	0.560132
30	Model3	2	2_4	0.786162	0.378693	0.102497	0.102497	0.316347	0.518399	0.656942	0.76399	0.874972	0.897503	0.897503	1	1	0.949411	0.855396	0.741396	0.550247	0.211578	0	0	0	0	0.24405	0.479913	0.647297	0.7884	0.950733	1	1	0.102497	0.102497	0.125437	0.158129	0.193586	0.228974	0.32906	0	0	0.185936	0.185936	0.221597	0.266916	0.307009	0.32338	0.257554	0
30	Model2	1	2	0.843551	0.579626	0.19384	0.33249	0.438992	0.546168	0.667589	0.758781	0.838194	0.879276	0.87183	0.996421	0.975019	0.939185	0.878198	0.789076	0.691205	0.540668	0.281874	6.31995e-06	0.0758496	0.23803	0.365456	0.497355	0.649729	0.768716	0.881934	0.967102	1	0.136823	0.158334	0.178708	0.204364	0.24879	0.305246	0.402353	0.557453	0.75	0.240607	0.272428	0.300279	0.331569	0.378304	0.423478	0.461367	0.374423
30	Model3	3	3_5	0.906587	0.742903	0.289869	0.44429	0.563887	0.673695	0.747386	0.806572	0.85568	0.885582	0.878407	0.994059	0.976528	0.946862	0.907248	0.859434	0.793784	0.695913	0.541204	0.206393	0.173721	0.356503	0.50072	0.635172	0.728905	0.808681	0.882032	0.942383	0.989248	0.165575	0.200192	0.238269	0.290864	0.343355	0.406293	0.493157	0.607734	0.759973	0.283868	0.332268	0.38073	0.440503	0.490678	0.537481	0.577248	0.572543
30	Model3	3	4	0.499914	0.210069	0.141586	0.141586	0.141586	0.141586	0.856754	0.858414	0.858414	0.858414	0.858414	1	1	1	1	0.00224588	0	0	0	0	0	0	0	0	0.997696	1	1	1	1	0.141586	0.141586	0.141586	0.141586	0.138508	0	0	0	0	0.248051	0.248051	0.248051	0.248051	0.00442009	0	0	0
30	Model2	3	2_3_5	0.91743	0.762748	0.325684	0.478465	0.585542	0.676434	0.750554	0.813644	0.863817	0.893297	0.881897	0.994725	0.976704	0.950806	0.917756	0.874212	0.813368	0.722517	0.569213	0.232115	0.215334	0.396286	0.525296	0.636631	0.730158	0.81369	0.887123	0.946751	0.989071	0.172934	0.210635	0.248326	0.294076	0.34826	0.418628	0.513561	0.638093	0.777929	0.294644	0.346537	0.393801	0.445425	0.498094	0.552759	0.600378	0.601689
30	Model2	3	4	0.500072	0.210061	0.141586	0.141586	0.141586	0.141586	0.142433	0.858414	0.858414	0.858414	0.858414	1	1	1	1	0.99873	0	0	0	0	0	0	0	0	0.00119673	1	1	1	1	0.141586	0.141586	0.141586	0.141586	0.141577	0	0	0	0	0.248051	0.248051	0.248051	0.248051	0.247998	0	0	0
30	Model2	2	4	0.645514	0.22394	0.102497	0.102497	0.102497	0.129381	0.57106	0.849567	0.896713	0.897503	0.897503	1	1	1	0.987164	0.576546	0.137752	0.0061726	0	0	0	0	0	0.0314208	0.570433	0.930858	0.998415	1	1	0.102497	0.102497	0.102497	0.104258	0.132906	0.185353	0.307803	0	0	0.185936	0.185936	0.185936	0.188598	0.216016	0.158046	0.0121025	0
30	Model3	1	5	0.884075	0.684627	0.241034	0.392743	0.545861	0.666262	0.747983	0.799941	0.84731	0.881257	0.879833	0.994818	0.969449	0.924434	0.873949	0.819643	0.757166	0.659978	0.49959	0.0931519	0.130218	0.307959	0.490206	0.635729	0.737448	0.806229	0.87485	0.937368	0.995486	0.143944	0.170775	0.210477	0.260744	0.314576	0.364862	0.436708	0.539736	0.752096	0.251497	0.290395	0.342885	0.401653	0.454657	0.492432	0.525616	0.518888
30	Model3	3	3_4	0.817236	0.551216	0.222803	0.326818	0.422382	0.509249	0.603608	0.729928	0.807509	0.85527	0.858414	0.992299	0.97059	0.932642	0.876751	0.788623	0.65763	0.484278	0.261818	0	0.0958837	0.220635	0.33822	0.448633	0.573092	0.741852	0.860823	0.953153	1	0.153279	0.170405	0.188606	0.20778	0.233534	0.295864	0.364642	0.479656	0	0.26554	0.289911	0.313761	0.335945	0.360357	0.408118	0.41603	0.338737
30	Model3	1	2_3_4	0.848897	0.586345	0.242761	0.35379	0.455752	0.549519	0.66637	0.752799	0.823732	0.87488	0.871829	0.993174	0.972696	0.93897	0.887109	0.784477	0.70698	0.567351	0.323502	0	0.13244	0.262803	0.384712	0.499889	0.649006	0.759535	0.861424	0.955941	1	0.144055	0.162463	0.183242	0.206838	0.247316	0.301787	0.37574	0.519099	0	0.251615	0.278423	0.306642	0.33546	0.37607	0.423007	0.45208	0.398598
30	Model2	3	2_4	0.840957	0.606401	0.191434	0.332813	0.450141	0.548138	0.668476	0.758729	0.830344	0.869249	0.858418	0.99743	0.976334	0.934949	0.874315	0.788903	0.696488	0.553515	0.305702	7.27699e-05	0.0584937	0.226671	0.370178	0.494339	0.648613	0.768995	0.876004	0.9622	0.999993	0.148745	0.172347	0.196688	0.221904	0.270236	0.332129	0.424057	0.571537	0.62963	0.258883	0.292977	0.325004	0.353969	0.402572	0.449776	0.480214	0.398341
30	Model1	3	9	0.853207	0.600476	0.276148	0.47686	0.641758	0.720402	0.763283	0.784296	0.793725	0.795478	0.786919	0.981829	0.914998	0.819254	0.733137	0.631831	0.539339	0.431434	0.293761	0.11004	0.159753	0.404594	0.612483	0.718302	0.784964	0.824699	0.853481	0.87823	0.898563	0.161588	0.202216	0.258544	0.300339	0.326433	0.336631	0.326903	0.284642	0.151771	0.277505	0.331229	0.393048	0.426115	0.430467	0.414531	0.371964	0.28913
30	Model3	2	4	0.502927	0.136506	0.102497	0.102497	0.102497	0.102497	0.57242	0.897503	0.897503	0.897503	0.897503	1	1	1	1	0.409289	0	0	0	0	0	0	0	0	0.59105	1	1	1	1	0.102497	0.102497	0.102497	0.102497	0.102573	0	0	0	0	0.185936	0.185936	0.185936	0.185936	0.164036	0	0	0
30	Model3	1	3_4_5	0.901324	0.705857	0.330965	0.470335	0.581556	0.661918	0.728869	0.788858	0.842517	0.8825	0.887385	0.991104	0.968841	0.93747	0.900473	0.855307	0.792708	0.698504	0.536398	0.200835	0.233916	0.397048	0.529232	0.626847	0.710281	0.788292	0.863689	0.933382	0.988317	0.159802	0.191086	0.22646	0.261865	0.302656	0.355035	0.429663	0.542067	0.716485	0.275227	0.319213	0.364797	0.405738	0.447102	0.490421	0.532051	0.539218
30	Model3	3	2_4_5	0.908719	0.749059	0.299557	0.468388	0.597969	0.689597	0.757545	0.814097	0.860901	0.888469	0.881555	0.99443	0.973052	0.943666	0.910677	0.866089	0.804015	0.708058	0.555768	0.238356	0.184945	0.385149	0.54095	0.653132	0.739642	0.81576	0.886111	0.943344	0.987643	0.167525	0.206997	0.253209	0.30218	0.354286	0.418532	0.50628	0.618025	0.760856	0.286745	0.341374	0.399281	0.453786	0.502867	0.5505	0.590405	0.585246
30	Model2	1	3_4	0.827723	0.54456	0.223701	0.336437	0.411829	0.493418	0.633775	0.746658	0.829248	0.875414	0.871829	0.994047	0.971847	0.942002	0.894326	0.783101	0.654442	0.484416	0.229362	0	0.11045	0.243023	0.333887	0.434479	0.611822	0.760216	0.879943	0.970392	1	0.141103	0.158776	0.172119	0.188635	0.228741	0.286348	0.372326	0.532461	0	0.247126	0.272957	0.291057	0.311555	0.354062	0.398385	0.421038	0.320616
30	Model1	2	4	0.497571	0.134719	0.104124	0.104124	0.104124	0.104124	0.104125	0.897495	0.897495	0.897495	0.897495	0.998714	0.998714	0.998714	0.998714	0.998714	0	0	0	0	0.00195971	0.00195971	0.00195971	0.00195971	0.00196136	0.999991	0.999991	0.999991	0.999991	0.102559	0.102559	0.102559	0.102559	0.102559	0	0	0	0	0.186016	0.186016	0.186016	0.186016	0.186016	0	0	0
30	Model2	3	2	0.840184	0.604005	0.157152	0.30874	0.424874	0.528877	0.664268	0.767132	0.84074	0.87005	0.858414	0.999375	0.980857	0.945602	0.887291	0.788565	0.681908	0.520363	0.247082	0	0.0182364	0.197882	0.338985	0.46976	0.643766	0.781188	0.893583	0.972801	1	0.14376	0.16784	0.190906	0.216304	0.267459	0.339506	0.446451	0.599737	0	0.251362	0.286633	0.317677	0.347817	0.399439	0.453316	0.480582	0.349979
30	Model1	2	9	0.71425	0.292577	0.153634	0.318206	0.480419	0.64747	0.735334	0.791689	0.853707	0.874468	0.876716	0.96411	0.923671	0.820417	0.670363	0.51624	0.376967	0.212849	0.0802583	0.0256004	0.0610755	0.249061	0.44159	0.644856	0.760355	0.839051	0.926894	0.965169	0.973916	0.104958	0.123169	0.143679	0.177338	0.19744	0.211032	0.249531	0.208326	0.100787	0.189306	0.217355	0.244533	0.280478	0.285637	0.270586	0.229735	0.115875
30	Model1	1	4	0.493768	0.195504	0.128929	0.128929	0.128929	0.128929	0.12893	0.871691	0.871691	0.871693	0.871694	0.999555	0.999555	0.999555	0.999555	0.999555	0.000117972	0.000117972	0.000117972	0.000117972	0.000935004	0.000935004	0.000935004	0.000935314	0.000935623	0.999824	0.999825	0.999827	0.999828	0.128226	0.128226	0.128226	0.128226	0.128226	0.0897436	0.0900322	0.0910569	0.0915033	0.227294	0.227294	0.227294	0.227294	0.227294	0.000235635	0.000235636	0.00023564
30	Model3	2	2	0.786234	0.37971	0.102497	0.212962	0.425056	0.541218	0.628396	0.748808	0.81043	0.890922	0.897503	1	0.980408	0.907844	0.837423	0.76443	0.585131	0.427508	0.129316	0	0	0.125318	0.369921	0.507391	0.612861	0.767501	0.854161	0.977899	1	0.102497	0.11348	0.141297	0.162578	0.184006	0.223248	0.250806	0.400555	0	0.185936	0.203415	0.244535	0.272292	0.296614	0.323189	0.316142	0.195513
30	Model1	2	2	0.785105	0.382159	0.113983	0.181803	0.46754	0.763991	0.813724	0.844226	0.868242	0.887933	0.897234	0.996639	0.986095	0.890265	0.550238	0.417546	0.322391	0.237303	0.14807	0.0401123	0.0131813	0.089951	0.419264	0.788402	0.858968	0.903821	0.940296	0.972427	0.995119	0.103411	0.110119	0.148988	0.228973	0.252679	0.276831	0.312203	0.380145	0.484135	0.18738	0.198114	0.255258	0.323377	0.314835	0.297879	0.269649	0.213126
30	Model3	3	2_3	0.850468	0.617728	0.246388	0.361008	0.462577	0.556019	0.662878	0.760362	0.822019	0.865804	0.858414	0.992857	0.972086	0.937827	0.887662	0.811222	0.703006	0.561891	0.35122	0	0.123267	0.260218	0.38419	0.501319	0.63841	0.769822	0.864924	0.950678	1	0.157387	0.178127	0.20076	0.22696	0.270093	0.334998	0.40692	0.540131	0	0.271704	0.301082	0.330722	0.361492	0.405258	0.453766	0.472011	0.425657
30	Model1	1	5	0.798718	0.507663	0.193852	0.197436	0.285762	0.424573	0.601578	0.763687	0.831994	0.860792	0.864261	0.985546	0.983058	0.965702	0.920937	0.813812	0.650612	0.488103	0.291525	0.0904744	0.0774623	0.0819391	0.185801	0.3516	0.570377	0.780311	0.882551	0.944483	0.978018	0.135737	0.136011	0.148479	0.172738	0.217821	0.303321	0.379256	0.435658	0.376983	0.23861	0.23896	0.257385	0.290911	0.34366	0.413749	0.42685	0.349307
30	Model3	1	2_4_5	0.90194	0.713945	0.283531	0.484946	0.609596	0.691146	0.751541	0.804121	0.851001	0.88697	0.887846	0.993522	0.96797	0.932581	0.895485	0.85189	0.792514	0.701488	0.544523	0.186514	0.179153	0.413935	0.562113	0.661105	0.736788	0.805828	0.872982	0.937315	0.990952	0.15106	0.195374	0.238443	0.27978	0.322407	0.375014	0.448099	0.560836	0.751885	0.262247	0.325126	0.379783	0.426352	0.467778	0.509117	0.546867	0.552559
30	Model1	1	10	0.788536	0.461927	0.156949	0.157258	0.278461	0.615375	0.731901	0.789089	0.817802	0.827267	0.823407	0.995098	0.994818	0.96504	0.77916	0.623834	0.512119	0.372315	0.215072	0.0499087	0.0337295	0.034125	0.177524	0.591296	0.747788	0.829808	0.883294	0.917268	0.937122	0.131492	0.131506	0.147119	0.218914	0.266664	0.306698	0.319266	0.276506	0.104496	0.232289	0.232304	0.255315	0.341797	0.37362	0.383641	0.343756	0.24195
30	Model2	2	2_4	0.810547	0.433222	0.103021	0.267904	0.41564	0.528174	0.665609	0.762037	0.844363	0.894391	0.897503	0.999981	0.977486	0.925014	0.8579	0.739769	0.617236	0.459286	0.2036	0	0.000586704	0.186868	0.357469	0.490519	0.65714	0.778573	0.888339	0.973281	1	0.102549	0.120713	0.141196	0.161286	0.197694	0.241472	0.319607	0.465305	0	0.186021	0.214889	0.244996	0.271525	0.312008	0.347139	0.376922	0.283257
30	Model2	3	2_3_4	0.858197	0.628536	0.263437	0.385645	0.476587	0.57211	0.680495	0.762949	0.82757	0.871177	0.86123	0.993685	0.971471	0.938361	0.889053	0.819683	0.728194	0.597788	0.370883	0.0296673	0.14299	0.28902	0.400422	0.519833	0.657537	0.768681	0.86547	0.953695	0.998386	0.160541	0.18392	0.205173	0.233947	0.283041	0.341771	0.422936	0.56917	0.752025	0.276422	0.309285	0.336721	0.370421	0.420784	0.465204	0.495386	0.449114
30	Model2	2	2	0.812214	0.437676	0.106186	0.278287	0.416036	0.522129	0.66451	0.763599	0.847885	0.895037	0.897503	0.999904	0.975449	0.925611	0.863249	0.746923	0.621126	0.454457	0.205304	0	0.00412123	0.198669	0.357841	0.483172	0.655098	0.779869	0.892816	0.973806	1	0.102868	0.12205	0.141345	0.160193	0.198279	0.243705	0.326242	0.472324	0	0.186545	0.216954	0.24524	0.270238	0.313371	0.350061	0.379821	0.286204
30	Model2	3	3_4_5	0.913174	0.755306	0.32569	0.478825	0.58487	0.678544	0.751482	0.811876	0.859403	0.889488	0.882478	0.993364	0.972075	0.944699	0.910407	0.866083	0.807228	0.719598	0.57559	0.245083	0.215564	0.397468	0.52552	0.6403	0.732579	0.812643	0.882463	0.941262	0.987609	0.17278	0.210172	0.247213	0.294514	0.348186	0.415423	0.502439	0.61778	0.765382	0.294361	0.345618	0.391877	0.445055	0.49669	0.548547	0.591723	0.595939
30	Model2	3	3	0.830333	0.57889	0.239173	0.349648	0.433804	0.520474	0.63038	0.729727	0.818778	0.865507	0.85876	0.993559	0.971189	0.93572	0.880831	0.79841	0.688212	0.515709	0.26565	0.00340306	0.114746	0.247132	0.351019	0.461037	0.602665	0.736574	0.868766	0.964446	0.999841	0.156202	0.17544	0.192124	0.212326	0.248928	0.301144	0.393262	0.552051	0.779157	0.269962	0.297194	0.318793	0.342171	0.379527	0.418961	0.446238	0.358694
30	Model2	3	2_5	0.91446	0.758204	0.307019	0.488501	0.593561	0.681497	0.754154	0.813488	0.860364	0.889503	0.88131	0.994401	0.971618	0.945658	0.913414	0.870016	0.810757	0.722644	0.577765	0.232236	0.193643	0.408816	0.535486	0.643245	0.735044	0.813938	0.883079	0.94092	0.988368	0.169023	0.213267	0.251375	0.296913	0.351322	0.41817	0.50481	0.617299	0.767063	0.288934	0.349762	0.397174	0.448151	0.500526	0.551756	0.594398	0.596878
30	Model2	1	3_4_5	0.908497	0.722523	0.33846	0.487236	0.595818	0.678451	0.751371	0.809945	0.856605	0.889215	0.891381	0.991104	0.969022	0.939996	0.902932	0.856581	0.795137	0.70837	0.564269	0.241014	0.242513	0.416407	0.545219	0.645449	0.735904	0.812121	0.878397	0.936986	0.986994	0.161323	0.196211	0.23305	0.272409	0.322874	0.383549	0.461322	0.568307	0.731496	0.27748	0.326343	0.373499	0.418545	0.468976	0.517481	0.558757	0.566281
30	Model1	3	5	0.790043	0.518858	0.190856	0.190916	0.195217	0.269186	0.33497	0.479886	0.627115	0.768116	0.822994	0.988116	0.987957	0.987056	0.972369	0.951144	0.886955	0.777174	0.546974	0.160098	0.0593568	0.059453	0.0646122	0.153204	0.23334	0.412744	0.602365	0.80459	0.932331	0.147676	0.147669	0.148247	0.159238	0.169869	0.199432	0.243783	0.315857	0.280694	0.25695	0.256934	0.257778	0.273661	0.288256	0.325643	0.371145	0.400462
30	Model3	2	3	0.814064	0.415213	0.219223	0.326212	0.431271	0.515118	0.636608	0.730679	0.816111	0.87629	0.897503	0.991555	0.970707	0.930984	0.880111	0.78405	0.662635	0.470788	0.232349	0	0.131021	0.252609	0.374202	0.473436	0.61977	0.73845	0.855547	0.949829	1	0.115288	0.129167	0.145223	0.160285	0.190604	0.224404	0.271242	0.345931	0	0.206559	0.227995	0.251253	0.271182	0.306659	0.335268	0.344184	0.277985
30	Model3	1	2	0.826697	0.554768	0.16606	0.276066	0.4102	0.539836	0.723504	0.794224	0.835908	0.876776	0.871829	0.997575	0.98077	0.940672	0.873727	0.706607	0.641924	0.528833	0.277374	0	0.0438157	0.172464	0.332213	0.490749	0.725988	0.816615	0.881053	0.964897	1	0.132981	0.148383	0.171561	0.201427	0.274895	0.339763	0.395264	0.53739	0	0.234679	0.257767	0.290196	0.32738	0.395807	0.444342	0.452395	0.365893
30	Model2	3	2_3	0.861205	0.63468	0.259638	0.379572	0.469024	0.56913	0.668965	0.762138	0.833632	0.872235	0.858414	0.994131	0.974476	0.944126	0.896788	0.830109	0.731747	0.585361	0.351693	1.42686e-06	0.138492	0.281449	0.390661	0.515086	0.642386	0.76715	0.874581	0.958093	1	0.159897	0.182796	0.203543	0.233736	0.276862	0.341383	0.434968	0.580572	0.5	0.275484	0.307845	0.334888	0.370822	0.415234	0.465565	0.499081	0.438036
30	Model1	1	9	0.854884	0.625094	0.189574	0.262157	0.389991	0.531007	0.688805	0.780696	0.832188	0.868217	0.869005	0.993516	0.985106	0.959154	0.910499	0.824093	0.741065	0.628416	0.440336	0.12255	0.071383	0.155874	0.306316	0.475216	0.668916	0.786522	0.862145	0.931121	0.978744	0.135911	0.146442	0.168935	0.203231	0.267897	0.337898	0.401257	0.484495	0.458752	0.239112	0.25498	0.287273	0.332291	0.404348	0.464158	0.48978	0.461362
30	Model1	2	3	0.812429	0.416761	0.307786	0.423128	0.511544	0.624049	0.703941	0.771361	0.827451	0.872862	0.896873	0.975021	0.936589	0.887006	0.805062	0.705415	0.58411	0.435034	0.25118	0.0604453	0.231586	0.36449	0.468665	0.603376	0.703772	0.792745	0.872266	0.94386	0.992395	0.126568	0.14406	0.160121	0.188184	0.213807	0.243489	0.280031	0.338167	0.475819	0.224051	0.249711	0.271273	0.30506	0.328153	0.343704	0.340732	0.288254
30	Model3	3	2_3_4_5	0.91236	0.752623	0.341197	0.482473	0.59898	0.690099	0.75492	0.81005	0.857167	0.887465	0.883801	0.992923	0.974269	0.946845	0.912666	0.870368	0.811359	0.722284	0.580877	0.265115	0.233702	0.401357	0.541604	0.653389	0.735879	0.809835	0.879415	0.938033	0.985847	0.176085	0.211625	0.254116	0.302797	0.352134	0.413052	0.49697	0.607247	0.755478	0.299124	0.34772	0.400693	0.454728	0.501408	0.547419	0.588808	0.593769
30	Model3	3	2_4	0.827375	0.582934	0.176485	0.304148	0.423891	0.584891	0.69084	0.768898	0.831668	0.865068	0.858414	0.997357	0.976423	0.936871	0.841051	0.761891	0.663189	0.511234	0.318082	0	0.0410917	0.193263	0.339281	0.542641	0.679121	0.786333	0.88452	0.955287	1	0.146432	0.166411	0.189546	0.232723	0.281418	0.3386	0.422029	0.539881	0	0.25537	0.284358	0.315301	0.364568	0.411019	0.44831	0.462368	0.400312
30	Model2	3	2_4_5	0.913389	0.755958	0.304406	0.4908	0.598906	0.688967	0.75793	0.81472	0.859146	0.888589	0.882787	0.993883	0.971113	0.944218	0.910944	0.867306	0.80781	0.72242	0.5789	0.252731	0.190684	0.411577	0.54195	0.652355	0.739889	0.815859	0.881697	0.939669	0.986707	0.168436	0.213966	0.253733	0.30177	0.354825	0.41981	0.501795	0.612802	0.758217	0.288055	0.350669	0.399982	0.453356	0.503615	0.552495	0.592227	0.595369
30	Model1	3	4	0.499862	0.209728	0.141901	0.141901	0.141901	0.858069	0.858069	0.858069	0.858069	0.858069	0.858069	0.999864	0.999864	0.999864	0.000136979	0.000136979	0.000136979	0.000136979	0.000136979	0.000136979	0.000389966	0.000389966	0.000389966	0.999575	0.999575	0.999575	0.999575	0.999575	0.999575	0.141617	0.141617	0.141617	0.0504732	0.0504732	0.0504732	0.0504732	0.0504732	0.0504732	0.248094	0.248094	0.248094	0.000273216	0.000273216	0.000273216	0.000273216	0.000273216
30	Model2	1	3	0.824594	0.535707	0.226097	0.33633	0.411841	0.492513	0.641185	0.745125	0.828365	0.874671	0.871829	0.993625	0.971461	0.94102	0.892055	0.774679	0.6524	0.481454	0.229307	0	0.11326	0.242957	0.334044	0.433774	0.62156	0.758757	0.879366	0.969548	1	0.141435	0.158711	0.172004	0.188056	0.231326	0.284474	0.369775	0.525396	0	0.247623	0.272846	0.290846	0.310627	0.356267	0.396191	0.418289	0.31927
30	Model3	3	3_4_5	0.906907	0.743536	0.314062	0.448402	0.566873	0.674993	0.745757	0.805195	0.854344	0.885137	0.879866	0.993516	0.976029	0.946307	0.907489	0.860764	0.796428	0.700973	0.547598	0.223996	0.201994	0.361376	0.504289	0.636646	0.726787	0.806641	0.879641	0.94081	0.988045	0.170364	0.20133	0.239466	0.291755	0.341951	0.404538	0.489953	0.604107	0.755524	0.290854	0.333804	0.382213	0.441552	0.489458	0.536544	0.576768	0.574466
30	Model3	3	2	0.827436	0.583115	0.141586	0.313677	0.41756	0.588367	0.688689	0.757029	0.831683	0.867271	0.858414	1	0.973926	0.938515	0.838534	0.763362	0.68496	0.511204	0.281928	0	0	0.204776	0.331635	0.547105	0.676373	0.768916	0.884542	0.963817	1	0.141586	0.168056	0.188052	0.233942	0.280085	0.328362	0.422061	0.562394	0	0.248051	0.286649	0.313323	0.365823	0.409808	0.443916	0.462375	0.375578
30	Model2	2	3	0.82733	0.454681	0.23111	0.348153	0.434957	0.521942	0.645599	0.740513	0.834438	0.890857	0.897503	0.993047	0.972209	0.939434	0.887343	0.794075	0.672072	0.488859	0.25025	0	0.144095	0.276884	0.377344	0.480212	0.628643	0.748329	0.873904	0.964015	1	0.116999	0.133105	0.146978	0.16315	0.19627	0.233699	0.306878	0.442649	0	0.209334	0.234152	0.254188	0.275623	0.314745	0.346804	0.377059	0.319738
30	Model3	1	2_3_5	0.906921	0.717996	0.348754	0.500359	0.604	0.682421	0.744657	0.797972	0.846698	0.885725	0.890265	0.991782	0.969595	0.93876	0.902938	0.859495	0.802405	0.714437	0.557896	0.22455	0.25422	0.431374	0.554786	0.650002	0.727774	0.797321	0.866142	0.933921	0.988134	0.163535	0.200436	0.236634	0.274979	0.317017	0.367899	0.439667	0.553813	0.735592	0.280773	0.332199	0.377988	0.421573	0.46319	0.504491	0.544343	0.555847
30	Model1	3	3	0.814874	0.545435	0.275694	0.37776	0.465371	0.554799	0.656522	0.767639	0.826483	0.856217	0.855318	0.981651	0.954455	0.912643	0.846942	0.739668	0.587062	0.416569	0.206992	0.0230452	0.159254	0.282641	0.391599	0.506613	0.642808	0.797423	0.894094	0.963299	0.992592	0.161483	0.17996	0.198345	0.220657	0.254595	0.323404	0.393486	0.481931	0.339107	0.277343	0.302824	0.325869	0.350101	0.378805	0.417057	0.404699	0.289599
30	Model2	1	2_3_4_5	0.912795	0.730803	0.30472	0.47105	0.578762	0.667864	0.743621	0.808529	0.86195	0.894708	0.886227	0.99458	0.976256	0.947616	0.910122	0.862811	0.798737	0.702503	0.541378	0.158467	0.203301	0.396778	0.524536	0.632249	0.726099	0.809969	0.885391	0.946653	0.993218	0.155069	0.192198	0.226607	0.266773	0.316522	0.381925	0.473997	0.598703	0.774518	0.268305	0.321167	0.36575	0.412604	0.463141	0.516757	0.566059	0.568599
30	Model3	1	4_5	0.884332	0.685196	0.245479	0.396548	0.547666	0.66752	0.748949	0.800853	0.847088	0.881471	0.883605	0.994266	0.968819	0.924156	0.874224	0.819715	0.756972	0.661769	0.504172	0.148439	0.135398	0.312416	0.492316	0.637132	0.738545	0.807304	0.874332	0.936939	0.991685	0.144613	0.171599	0.211117	0.261549	0.315499	0.366093	0.436358	0.54031	0.724098	0.2525	0.291557	0.343714	0.402638	0.455631	0.49351	0.525929	0.521616
30	Model3	3	4_5	0.892122	0.723908	0.250255	0.396997	0.550265	0.661991	0.756068	0.81153	0.857359	0.882492	0.876196	0.995678	0.973178	0.93065	0.885239	0.835735	0.769238	0.665197	0.52715	0.194454	0.127306	0.301963	0.487524	0.625168	0.742927	0.818506	0.889054	0.941102	0.988641	0.158379	0.18696	0.230489	0.280335	0.349048	0.411443	0.497214	0.59616	0.738466	0.273287	0.313661	0.369473	0.425822	0.49243	0.536127	0.569068	0.559535
30	Model2	1	3_5	0.909	0.72465	0.325615	0.473427	0.583956	0.667731	0.743059	0.807128	0.858445	0.891567	0.889175	0.992534	0.971615	0.942225	0.90519	0.857917	0.795478	0.702669	0.550868	0.2016	0.227569	0.400186	0.531285	0.632822	0.726173	0.80884	0.881346	0.941654	0.990258	0.15889	0.192338	0.228116	0.266016	0.315351	0.379565	0.465416	0.581243	0.752613	0.273928	0.32111	0.367306	0.411191	0.461182	0.513914	0.559948	0.565648
30	Model2	2	3_4	0.825124	0.450434	0.227667	0.358848	0.446844	0.536504	0.649958	0.736535	0.823182	0.889947	0.897503	0.992941	0.96749	0.932448	0.876018	0.78522	0.6798	0.513597	0.251738	0	0.140271	0.28934	0.391387	0.497731	0.634511	0.743014	0.858537	0.962832	1	0.116528	0.134555	0.148913	0.166099	0.197015	0.232008	0.293099	0.43614	0	0.208578	0.236252	0.256812	0.27925	0.314996	0.345948	0.373213	0.319222
30	Model3	2	2_3	0.835407	0.45585	0.246084	0.361043	0.4607	0.548721	0.650449	0.731606	0.810952	0.877156	0.897989	0.991218	0.968978	0.934697	0.883226	0.810725	0.710326	0.53652	0.267492	0.0100485	0.160988	0.291616	0.406568	0.51052	0.632145	0.734037	0.842293	0.946781	0.999394	0.11888	0.135108	0.152454	0.17086	0.201082	0.233721	0.279807	0.364679	0.654437	0.212299	0.23715	0.262149	0.286329	0.32224	0.351715	0.367799	0.308615
30	Model3	2	2_3_4	0.835421	0.456344	0.243408	0.361308	0.464048	0.549559	0.652041	0.732813	0.813325	0.877418	0.898093	0.99143	0.969281	0.933223	0.88377	0.80902	0.706681	0.531985	0.267844	0.0100582	0.157982	0.291876	0.410467	0.511391	0.634113	0.735797	0.845455	0.947033	0.999509	0.118529	0.135188	0.153103	0.171199	0.201606	0.233989	0.282184	0.366084	0.700537	0.211743	0.237281	0.26305	0.286835	0.322777	0.35157	0.368763	0.309352
30	Model3	1	2_3	0.848799	0.585058	0.245756	0.348996	0.457934	0.55658	0.64971	0.749039	0.823627	0.874748	0.871829	0.99281	0.974156	0.937879	0.882828	0.801376	0.714389	0.562295	0.321113	0	0.135928	0.257089	0.387376	0.508617	0.627413	0.754133	0.862046	0.95614	1	0.144507	0.161618	0.183718	0.208941	0.240239	0.299309	0.374696	0.518383	0	0.252293	0.277241	0.307249	0.337908	0.36966	0.421867	0.449715	0.39657
30	Model1	3	2	0.824736	0.584629	0.204002	0.369574	0.509773	0.667833	0.781629	0.828413	0.857938	0.868208	0.85908	0.991081	0.958965	0.898694	0.786669	0.638562	0.522007	0.387671	0.211516	0.0240954	0.0741828	0.272361	0.445625	0.648232	0.805226	0.878951	0.935504	0.976522	0.996801	0.150069	0.17856	0.210972	0.269464	0.350965	0.415641	0.497841	0.59774	0.554072	0.260667	0.301063	0.341723	0.401424	0.452969	0.462791	0.435903	0.312464
30	Model1	3	8	0.847557	0.64358	0.191135	0.301862	0.419137	0.555865	0.676647	0.744177	0.789478	0.824756	0.840289	0.989229	0.976385	0.945788	0.890881	0.814427	0.750189	0.664609	0.53296	0.320248	0.0594987	0.190607	0.332272	0.500608	0.653922	0.743185	0.810074	0.872884	0.926064	0.147837	0.16595	0.18938	0.227345	0.279617	0.325149	0.365953	0.408822	0.416712	0.257231	0.283684	0.315572	0.362248	0.416305	0.453668	0.472006	0.46271
30	Model1	1	3	0.803544	0.493384	0.176949	0.291229	0.394937	0.509304	0.668379	0.785281	0.833607	0.867271	0.872429	0.992732	0.976132	0.942708	0.87591	0.695317	0.470702	0.322865	0.158749	0.0165477	0.0570182	0.19054	0.314408	0.455408	0.664419	0.831528	0.908693	0.971434	0.998255	0.134027	0.150588	0.168155	0.191235	0.233487	0.291157	0.342038	0.44964	0.582283	0.236169	0.260923	0.285402	0.313931	0.349584	0.359773	0.332175	0.234652
30	Model2	1	2_3_5	0.914972	0.733345	0.369161	0.507039	0.60941	0.689159	0.758133	0.815352	0.861341	0.893066	0.892836	0.991702	0.970998	0.943955	0.910088	0.866718	0.807199	0.721427	0.578537	0.252444	0.277639	0.438831	0.560227	0.656679	0.742169	0.81655	0.88191	0.939306	0.986983	0.167935	0.202793	0.239867	0.280425	0.330745	0.39279	0.473165	0.583568	0.74033	0.287231	0.335514	0.38253	0.428742	0.478783	0.528438	0.571499	0.581041
30	Model1	2	8	0.804861	0.436048	0.116745	0.256369	0.363275	0.545426	0.671865	0.793603	0.827879	0.842506	0.846052	0.992031	0.96788	0.924802	0.821977	0.703609	0.54979	0.423873	0.29017	0.121882	0.0167851	0.175113	0.299148	0.513843	0.66824	0.821447	0.874018	0.905584	0.928754	0.103321	0.118165	0.130959	0.16184	0.194979	0.26016	0.277581	0.259796	0.163437	0.18715	0.210617	0.22943	0.270433	0.305344	0.353191	0.335472	0.274144
30	Model2	3	3_5	0.912778	0.753906	0.333508	0.482989	0.591885	0.684798	0.757556	0.816402	0.860885	0.88917	0.884751	0.992846	0.971989	0.945024	0.91028	0.864341	0.802724	0.715482	0.576005	0.276119	0.224758	0.402334	0.533639	0.647607	0.739942	0.818658	0.884868	0.940823	0.985138	0.174397	0.211507	0.250503	0.298767	0.354088	0.422004	0.506173	0.616189	0.753965	0.296681	0.347415	0.396029	0.449878	0.502373	0.553188	0.592897	0.59542
30	Model3	1	2_5	0.902567	0.71511	0.293425	0.477313	0.602992	0.687226	0.752137	0.80641	0.853434	0.888029	0.888854	0.993383	0.969468	0.934555	0.896148	0.851232	0.790919	0.698483	0.543678	0.200086	0.190522	0.40496	0.554248	0.656511	0.737569	0.808687	0.876214	0.938653	0.990113	0.152839	0.193237	0.235606	0.277223	0.322888	0.378024	0.453417	0.565762	0.748436	0.264919	0.322244	0.376336	0.423452	0.468185	0.51155	0.549881	0.5545
30	Model1	3	7	0.827735	0.62019	0.248141	0.385557	0.516551	0.680314	0.779286	0.832008	0.856069	0.866273	0.864529	0.977083	0.950976	0.897165	0.801432	0.700856	0.587299	0.4805	0.347591	0.154959	0.127911	0.292298	0.453773	0.660337	0.792222	0.87237	0.918015	0.951824	0.981565	0.155973	0.181426	0.213161	0.280146	0.357473	0.431488	0.491528	0.543386	0.580962	0.269005	0.304718	0.344476	0.415168	0.473458	0.497479	0.485952	0.423975
30	Model3	3	2_5	0.908761	0.748815	0.302865	0.470285	0.597804	0.687733	0.756308	0.813812	0.86125	0.888191	0.881415	0.994244	0.972671	0.943562	0.911122	0.867021	0.804313	0.706907	0.558043	0.237909	0.188829	0.387422	0.540775	0.650887	0.738047	0.815378	0.886707	0.942646	0.987555	0.168167	0.207541	0.253116	0.300924	0.353136	0.418119	0.507184	0.616095	0.759209	0.287676	0.34209	0.399157	0.452423	0.501864	0.550212	0.590618	0.585634
30	Model2	3	5	0.899666	0.73528	0.222336	0.421136	0.563795	0.664143	0.747262	0.812116	0.853712	0.88192	0.873423	0.996474	0.970729	0.931613	0.889983	0.843402	0.779306	0.691577	0.53847	0.16073	0.0946507	0.330487	0.503128	0.626893	0.731405	0.817527	0.880454	0.938568	0.990974	0.153647	0.192992	0.236206	0.282348	0.341202	0.413291	0.488275	0.591125	0.746	0.266242	0.321972	0.37686	0.428693	0.485851	0.540132	0.57241	0.563571
30	Model1	2	5	0.804401	0.467911	0.155004	0.32633	0.493838	0.687172	0.778719	0.830184	0.861369	0.880441	0.88679	0.985936	0.948077	0.875089	0.743799	0.639625	0.543425	0.430772	0.303714	0.0854679	0.0601094	0.255325	0.450298	0.680705	0.794604	0.862932	0.910544	0.946305	0.978303	0.106981	0.126939	0.153835	0.210132	0.26234	0.31166	0.354814	0.392451	0.310278	0.193018	0.2239	0.26167	0.327688	0.372075	0.396134	0.389121	0.342427
30	Model1	1	8	0.835836	0.631474	0.266704	0.385283	0.493015	0.62365	0.79586	0.852821	0.875339	0.884661	0.881923	0.980364	0.949044	0.897627	0.836084	0.703011	0.574652	0.460183	0.332663	0.16166	0.161786	0.302402	0.433532	0.59242	0.809511	0.893715	0.936372	0.965812	0.987812	0.146718	0.16667	0.188943	0.2317	0.351728	0.442854	0.515332	0.588564	0.66101	0.255238	0.283544	0.312175	0.362846	0.468871	0.500217	0.486199	0.425071
30	Model3	1	2_3_4_5	0.907097	0.718809	0.35028	0.501433	0.604162	0.680339	0.744026	0.797324	0.846739	0.886277	0.890436	0.991592	0.969348	0.938924	0.903195	0.860312	0.804109	0.715615	0.555928	0.227042	0.255998	0.432643	0.554948	0.647576	0.72693	0.796326	0.866016	0.934843	0.987964	0.163836	0.200753	0.236731	0.273661	0.316552	0.367254	0.439841	0.556413	0.734981	0.281209	0.33262	0.378125	0.42005	0.462812	0.50422	0.544819	0.55617
30	Model2	2	2_3	0.847052	0.488716	0.251481	0.375242	0.469559	0.560296	0.658199	0.754744	0.835262	0.892878	0.897504	0.992393	0.970138	0.938033	0.888065	0.814312	0.710047	0.548312	0.301186	9.62964e-06	0.166868	0.307303	0.416058	0.522864	0.640371	0.759848	0.868032	0.96045	0.999999	0.119744	0.137889	0.155014	0.175297	0.205459	0.252424	0.321803	0.465151	0.666667	0.213702	0.241458	0.266061	0.292798	0.328129	0.372443	0.405575	0.365628
30	Model2	1	2_3_4	0.861488	0.60971	0.2652	0.378268	0.465865	0.559638	0.672707	0.762865	0.836581	0.881687	0.871829	0.993145	0.973321	0.944863	0.896804	0.821782	0.723976	0.57975	0.335451	0	0.158182	0.290787	0.395445	0.51007	0.650791	0.768582	0.874339	0.961991	1	0.147806	0.167888	0.186839	0.212043	0.257037	0.315032	0.404145	0.56474	0	0.257316	0.286378	0.311985	0.342989	0.391592	0.439026	0.476277	0.420894
30	Model2	3	2_3_4_5	0.917536	0.760988	0.354876	0.501076	0.610191	0.696828	0.764827	0.820903	0.864238	0.891722	0.886503	0.993342	0.97393	0.947992	0.915022	0.871898	0.812737	0.726725	0.589299	0.292987	0.249569	0.423084	0.554474	0.660839	0.747166	0.82225	0.886919	0.941604	0.984397	0.179203	0.217799	0.259784	0.307953	0.362567	0.429926	0.514561	0.624689	0.755927	0.30363	0.355989	0.407813	0.460817	0.512159	0.562368	0.602511	0.606479
30	Model2	1	4_5	0.894734	0.703225	0.224046	0.437194	0.577086	0.674078	0.743104	0.807811	0.85038	0.882167	0.885422	0.995224	0.964206	0.92328	0.882969	0.83361	0.772625	0.689943	0.542707	0.168168	0.110673	0.359716	0.52619	0.643369	0.729798	0.812983	0.873966	0.932073	0.990868	0.141277	0.18126	0.222682	0.266854	0.312033	0.377862	0.44592	0.540139	0.730267	0.24743	0.305154	0.358822	0.409844	0.454092	0.507516	0.541719	0.54142
30	Model2	3	4_5	0.900741	0.737041	0.25753	0.437082	0.586644	0.668601	0.756556	0.811728	0.85255	0.88108	0.876634	0.995688	0.968171	0.929186	0.889223	0.843361	0.783648	0.701157	0.557559	0.202229	0.135779	0.349484	0.530145	0.632212	0.742238	0.816359	0.87752	0.934441	0.98787	0.159685	0.197097	0.245956	0.285093	0.350504	0.413091	0.485655	0.583811	0.733319	0.275229	0.327519	0.388956	0.431759	0.495201	0.541	0.573841	0.570383
30	Model2	1	2_3	0.8615	0.608986	0.271293	0.378419	0.465727	0.565174	0.67201	0.763209	0.840116	0.882384	0.871837	0.99261	0.97341	0.944382	0.895165	0.82325	0.727448	0.577581	0.334406	9.26927e-05	0.16525	0.290947	0.395359	0.516661	0.649775	0.768466	0.878712	0.962945	0.999996	0.148802	0.167932	0.18674	0.214007	0.256824	0.315957	0.411795	0.570212	0.758621	0.258807	0.286446	0.311821	0.345431	0.39151	0.440562	0.480798	0.421575
30	Model1	1	7	0.837163	0.557639	0.214046	0.295485	0.423332	0.536242	0.659694	0.756007	0.808636	0.838565	0.846353	0.987432	0.971661	0.927491	0.875758	0.806553	0.713019	0.603518	0.46234	0.261071	0.100347	0.196078	0.349213	0.486328	0.638104	0.762327	0.838792	0.893875	0.932398	0.138939	0.150879	0.173227	0.200412	0.246788	0.306057	0.354995	0.39042	0.362142	0.243601	0.261199	0.29193	0.326179	0.377936	0.428279	0.447038	0.423348
30	Model2	1	4	0.707911	0.342605	0.128171	0.128171	0.128181	0.274497	0.5734	0.82151	0.864651	0.871829	0.871829	1	1	0.999994	0.934361	0.683214	0.193032	0.0381515	8.42661e-06	0	0	0	1.2698e-05	0.177488	0.557255	0.913904	0.986158	0.999998	1	0.128171	0.128171	0.128172	0.143106	0.184912	0.247903	0.288362	0.4	0	0.227219	0.227219	0.22722	0.248198	0.291051	0.217053	0.0673873	1.68529e-05
30	Model2	1	2_4	0.845024	0.584516	0.189111	0.331436	0.445033	0.553877	0.670442	0.758293	0.83575	0.879717	0.871834	0.996878	0.975856	0.938385	0.874387	0.787827	0.696257	0.550864	0.281853	5.47729e-05	0.0703579	0.236697	0.372504	0.506758	0.653184	0.767413	0.877632	0.967611	0.999998	0.136178	0.158215	0.180227	0.206737	0.25035	0.305599	0.398248	0.561276	0.764706	0.239623	0.272285	0.302379	0.334408	0.37996	0.424763	0.462286	0.375263
30	Model3	1	2_4	0.825957	0.552104	0.128171	0.128171	0.128171	0.225517	0.742707	0.874338	0.871829	0.871829	0.871829	1	1	1	0.988426	0.692159	0.048908	0	0	0	0	0	0	0.113359	0.750138	0.995688	1	1	1	0.128171	0.128171	0.128171	0.140813	0.289396	0.625094	0	0	0	0.227219	0.227219	0.227219	0.246508	0.408144	0.0907182	0	0
30	Model2	1	5	0.894342	0.701562	0.222631	0.43687	0.576497	0.67338	0.742491	0.807174	0.850054	0.88213	0.88491	0.995271	0.964082	0.923063	0.88274	0.833553	0.772136	0.689301	0.540598	0.164837	0.109042	0.359363	0.525547	0.642601	0.729103	0.812325	0.873686	0.93234	0.99077	0.14106	0.181159	0.222407	0.266383	0.311467	0.376887	0.445142	0.540152	0.724178	0.247099	0.305005	0.358448	0.409263	0.453484	0.506532	0.540947	0.540375
30	Model2	3	3_4	0.82934	0.57601	0.232699	0.347669	0.433978	0.518142	0.631565	0.72662	0.816946	0.865614	0.858431	0.994056	0.971222	0.93485	0.87969	0.797227	0.689098	0.516645	0.258116	0.000182638	0.107122	0.244821	0.351365	0.458508	0.604241	0.732808	0.866477	0.965814	0.99999	0.155141	0.175002	0.192062	0.211328	0.249394	0.298435	0.389575	0.554635	0.744186	0.268394	0.296567	0.318657	0.340788	0.379934	0.416494	0.444201	0.352286
30	Model3	3	3	0.817218	0.552148	0.222802	0.325745	0.423318	0.50309	0.606966	0.730201	0.807768	0.856086	0.858414	0.992299	0.970901	0.932157	0.881262	0.787122	0.657573	0.484006	0.253102	0	0.0958815	0.219333	0.339391	0.440715	0.577252	0.74218	0.861169	0.955541	1	0.153278	0.170215	0.188798	0.206282	0.234949	0.296111	0.36509	0.484267	0	0.265539	0.289649	0.313998	0.33431	0.36188	0.408342	0.416221	0.33245
30	Model2	2	2_3_4	0.848547	0.492628	0.25321	0.37755	0.470355	0.559669	0.662044	0.759473	0.836673	0.891605	0.897503	0.992441	0.970167	0.938298	0.889885	0.814649	0.708275	0.550195	0.315823	0	0.168788	0.309872	0.416915	0.521958	0.644616	0.765319	0.86939	0.95736	1	0.119992	0.138334	0.155244	0.175319	0.207473	0.256321	0.324815	0.458251	0	0.214099	0.242142	0.26641	0.292927	0.330719	0.376418	0.408479	0.373934
30	Model1	2	10	0.759013	0.344076	0.174666	0.302911	0.427045	0.530449	0.62484	0.706775	0.772506	0.818112	0.841093	0.974462	0.91979	0.856894	0.798673	0.723225	0.633356	0.517824	0.366836	0.172077	0.0833274	0.232462	0.377955	0.499817	0.613604	0.715159	0.801592	0.869649	0.917496	0.108259	0.120381	0.135934	0.154229	0.17611	0.20251	0.229617	0.243221	0.19237	0.194869	0.212898	0.234644	0.258534	0.283248	0.306893	0.318155	0.292505
30	Model1	2	7	0.782504	0.426255	0.255949	0.45128	0.605157	0.707479	0.774539	0.821161	0.856097	0.88114	0.894923	0.949449	0.885094	0.799371	0.716614	0.638084	0.555409	0.464009	0.351169	0.180532	0.17675	0.401738	0.582977	0.706436	0.790123	0.85151	0.900875	0.941663	0.976508	0.11638	0.144535	0.179594	0.218003	0.257723	0.299307	0.348357	0.407394	0.467408	0.207345	0.248492	0.293294	0.334306	0.367153	0.38899	0.397951	0.377198
30	Model3	2	2_4_5	0.874107	0.568773	0.134121	0.363164	0.52389	0.621337	0.700305	0.765172	0.83302	0.889983	0.897503	0.998926	0.971106	0.926882	0.876774	0.815048	0.73075	0.616442	0.432077	0	0.0353579	0.293736	0.477867	0.592165	0.687201	0.769103	0.857754	0.942276	1	0.105754	0.135716	0.168558	0.197119	0.22933	0.265478	0.331063	0.460869	0	0.19126	0.238149	0.285243	0.321874	0.357945	0.389465	0.430776	0.446009
30	Model3	2	4_5	0.856536	0.54922	0.175867	0.300183	0.486861	0.615215	0.703843	0.801495	0.850941	0.889329	0.9024	0.99584	0.973326	0.914113	0.845878	0.777786	0.70113	0.603764	0.44475	0.124579	0.0822238	0.223309	0.438068	0.588873	0.695399	0.812957	0.879169	0.940101	0.991229	0.110254	0.125197	0.156671	0.190261	0.225773	0.299762	0.363317	0.458861	0.61861	0.198528	0.221857	0.267495	0.310649	0.34996	0.41997	0.453649	0.451695
30	Model3	2	2_5	0.875757	0.571812	0.191415	0.389067	0.536337	0.630355	0.702093	0.779985	0.843647	0.889515	0.902664	0.995455	0.967009	0.923622	0.875643	0.816767	0.738237	0.630968	0.464086	0.103369	0.0995918	0.323064	0.492108	0.602342	0.688997	0.784752	0.867935	0.9381	0.993945	0.112103	0.140257	0.171967	0.200942	0.230723	0.281444	0.353012	0.461268	0.660971	0.201513	0.244982	0.289949	0.326873	0.359807	0.407525	0.452732	0.462673
30	Model3	2	5	0.857724	0.551062	0.188071	0.307127	0.486662	0.616991	0.73212	0.804211	0.851365	0.888459	0.902475	0.995036	0.97193	0.915254	0.847413	0.777782	0.701081	0.604621	0.455217	0.13494	0.0959143	0.231205	0.437716	0.590676	0.726905	0.815989	0.879544	0.937936	0.990129	0.111657	0.126162	0.156753	0.19122	0.245426	0.303189	0.364365	0.455823	0.609566	0.200783	0.223334	0.267664	0.31203	0.373117	0.423313	0.454708	0.45552
30	Model3	2	2_3_5	0.885821	0.586449	0.270827	0.411774	0.530443	0.624229	0.696532	0.77434	0.831871	0.885497	0.90439	0.993019	0.972888	0.938471	0.891272	0.833138	0.75729	0.648739	0.477881	0.139505	0.188351	0.347693	0.483845	0.593732	0.680931	0.776288	0.852785	0.932048	0.991741	0.122593	0.145539	0.17194	0.200344	0.229702	0.278804	0.334779	0.445412	0.65859	0.218242	0.2532	0.290633	0.327149	0.360118	0.407561	0.441647	0.461075
30	Model3	2	3_4_5	0.881895	0.581788	0.276084	0.410097	0.521739	0.616763	0.708074	0.775735	0.840672	0.886416	0.904925	0.991213	0.969296	0.93436	0.886606	0.827528	0.750308	0.646905	0.491468	0.180358	0.194415	0.346236	0.474617	0.585946	0.694432	0.778638	0.8628	0.931519	0.987673	0.123205	0.144802	0.168815	0.19649	0.23622	0.279066	0.350004	0.450429	0.625589	0.219168	0.251964	0.285963	0.321687	0.367528	0.406821	0.454243	0.470055
30	Model2	2	4_5	0.871287	0.579865	0.175488	0.336318	0.52641	0.638819	0.711317	0.802824	0.854658	0.890029	0.904352	0.996466	0.971289	0.913155	0.854722	0.794215	0.724385	0.62909	0.477067	0.129398	0.08173	0.263803	0.482243	0.614162	0.70185	0.811782	0.880418	0.93719	0.992853	0.110263	0.130942	0.167648	0.201906	0.233254	0.305326	0.375308	0.4645	0.674032	0.198554	0.230772	0.283287	0.326649	0.360602	0.429584	0.470137	0.4707
30	Model2	2	5	0.871877	0.58077	0.188273	0.344806	0.533743	0.644345	0.713964	0.79255	0.852501	0.887998	0.904836	0.995643	0.969744	0.910858	0.852508	0.793714	0.726918	0.635658	0.49168	0.15432	0.0960694	0.273437	0.490675	0.620572	0.704856	0.800046	0.877265	0.933259	0.990546	0.111734	0.132265	0.169597	0.204197	0.234958	0.293372	0.371648	0.456912	0.650861	0.20092	0.232781	0.285952	0.329476	0.362583	0.418033	0.469055	0.473659
30	Model3	2	3_5	0.882177	0.582461	0.275774	0.415538	0.526122	0.620617	0.708844	0.775672	0.839028	0.885763	0.904737	0.991487	0.968309	0.932838	0.885711	0.828169	0.752244	0.65055	0.497092	0.17927	0.194038	0.35241	0.479674	0.590343	0.695217	0.778347	0.860552	0.93015	0.987587	0.123184	0.145855	0.169946	0.19802	0.236825	0.27932	0.347589	0.448346	0.622553	0.219142	0.253522	0.287513	0.323675	0.368323	0.407375	0.453091	0.471462
30	Model3	2	2_3_4_5	0.88612	0.585569	0.282391	0.427713	0.540838	0.628031	0.698783	0.777441	0.834507	0.885708	0.905487	0.99219	0.96985	0.934653	0.890694	0.834534	0.758782	0.653468	0.499783	0.193955	0.20133	0.3658	0.495863	0.598034	0.68328	0.779572	0.855183	0.929782	0.986746	0.124246	0.148678	0.174732	0.20195	0.23131	0.282187	0.340074	0.448381	0.625629	0.220839	0.25783	0.294422	0.329248	0.362222	0.411382	0.447344	0.472689
30	Model2	2	3_4_5	0.893157	0.611844	0.292967	0.446227	0.549465	0.630155	0.704033	0.772231	0.849816	0.893315	0.907596	0.991993	0.967827	0.93474	0.894478	0.840061	0.766958	0.666588	0.513409	0.175876	0.213137	0.386659	0.505466	0.599968	0.688498	0.772833	0.870741	0.936701	0.99116	0.125854	0.152691	0.177536	0.203415	0.235463	0.278274	0.370649	0.480866	0.694383	0.22337	0.263768	0.298397	0.331453	0.367827	0.408377	0.476401	0.496605
30	Model2	2	2_5	0.888909	0.607309	0.226258	0.445824	0.566038	0.643248	0.709515	0.775905	0.851894	0.891439	0.908083	0.994858	0.962642	0.923598	0.880896	0.826479	0.758281	0.662568	0.514753	0.194735	0.138483	0.386802	0.525204	0.616108	0.696157	0.777918	0.873516	0.934458	0.989549	0.116512	0.152027	0.181771	0.207641	0.237014	0.280542	0.374307	0.472829	0.680297	0.208595	0.262585	0.30376	0.336065	0.368384	0.409559	0.478368	0.492901
30	Model2	2	2_4_5	0.888018	0.604138	0.229919	0.441171	0.564692	0.645823	0.712643	0.790373	0.851408	0.890713	0.908208	0.994506	0.963123	0.92434	0.878325	0.822579	0.754044	0.660319	0.515562	0.208915	0.142602	0.381563	0.523619	0.61927	0.700088	0.794522	0.873231	0.933556	0.988069	0.11697	0.150998	0.181395	0.208522	0.238517	0.295322	0.372986	0.469813	0.666626	0.209321	0.261066	0.303275	0.33703	0.369804	0.42442	0.476703	0.491625
30	Model2	2	3_5	0.89451	0.616823	0.296981	0.448929	0.553164	0.635413	0.707931	0.77531	0.852167	0.894348	0.908541	0.991887	0.967962	0.934446	0.892817	0.839387	0.769009	0.671706	0.521479	0.191914	0.217622	0.389655	0.509621	0.606017	0.692919	0.77603	0.872776	0.936931	0.990381	0.126473	0.153343	0.178725	0.205591	0.237901	0.281669	0.376153	0.485666	0.694989	0.22434	0.264746	0.30006	0.33422	0.370729	0.412317	0.482249	0.502936
30	Model2	2	2_3_4_5	0.899707	0.622005	0.313039	0.463851	0.573595	0.661547	0.737784	0.813126	0.86193	0.895502	0.910849	0.992792	0.970528	0.937142	0.89183	0.834163	0.761753	0.668865	0.536275	0.29642	0.23541	0.405987	0.532077	0.635248	0.726777	0.818993	0.883978	0.936527	0.981019	0.129138	0.157248	0.186145	0.218279	0.258526	0.324603	0.397	0.491061	0.640731	0.228547	0.270646	0.310597	0.350718	0.394719	0.455223	0.498261	0.512673
30	Model2	2	2_3_5	0.898433	0.623188	0.312091	0.46359	0.56376	0.645712	0.719439	0.786069	0.856098	0.894998	0.910582	0.992195	0.968627	0.936849	0.896106	0.84192	0.770169	0.673285	0.529996	0.247819	0.234422	0.405914	0.521152	0.617116	0.705451	0.787885	0.876976	0.936682	0.98627	0.128925	0.156972	0.182628	0.210909	0.246096	0.293115	0.384617	0.488729	0.673347	0.228198	0.270163	0.305669	0.341453	0.380864	0.424625	0.489567	0.508527
[truncated: 12 more columns]

## Sheet: TEST
WS	Name	Fold	Channel	AUROC_S	AUPR_S	acc_T_0.1	acc_T_0.2	acc_T_0.3	acc_T_0.4	acc_T_0.5	acc_T_0.6	acc_T_0.7	acc_T_0.8	acc_T_0.9	rec_T_0.1	rec_T_0.2	rec_T_0.3	rec_T_0.4	rec_T_0.5	rec_T_0.6	rec_T_0.7	rec_T_0.8	rec_T_0.9	spec_T_0.1	spec_T_0.2	spec_T_0.3	spec_T_0.4	spec_T_0.5	spec_T_0.6	spec_T_0.7	spec_T_0.8	spec_T_0.9	pres_T_0.1	pres_T_0.2	pres_T_0.3	pres_T_0.4	pres_T_0.5	pres_T_0.6	pres_T_0.7	pres_T_0.8	pres_T_0.9	f1_b_T_0.1	f1_b_T_0.2	f1_b_T_0.3	f1_b_T_0.4	f1_b_T_0.5	f1_b_T_0.6	f1_b_T_0.7	f1_b_T_0.8
30	Model1	1	2	0.806869	0.621252	0.283032	0.406974	0.496378	0.572054	0.64509	0.763077	0.827729	0.836261	0.825327	0.980836	0.941912	0.891512	0.828084	0.741569	0.586654	0.397308	0.19028	0.0041161	0.135769	0.294081	0.412989	0.518022	0.624729	0.800309	0.918564	0.972587	0.998634	0.193231	0.219719	0.242717	0.2661	0.294299	0.382712	0.507295	0.594303	0.388698	0.322857	0.35632	0.381555	0.402772	0.421372	0.46323	0.445615	0.288265
30	Model1	3	10	0.851066	0.653221	0.296486	0.397373	0.523098	0.684669	0.773872	0.8225	0.858906	0.878947	0.876041	0.977258	0.956541	0.90952	0.839976	0.769726	0.691336	0.580424	0.432404	0.174159	0.189681	0.309646	0.462473	0.660303	0.774523	0.843078	0.902596	0.949005	0.986158	0.159105	0.178564	0.209775	0.279508	0.34878	0.4087	0.483174	0.570871	0.663743	0.273657	0.300949	0.340919	0.419443	0.480042	0.513708	0.527353	0.492082
30	Model1	3	9	0.849073	0.580113	0.273987	0.477004	0.642841	0.721798	0.765057	0.786655	0.796641	0.799199	0.791816	0.980682	0.908961	0.811478	0.724693	0.622376	0.531357	0.425612	0.290657	0.108894	0.163115	0.409235	0.616384	0.721343	0.787442	0.826708	0.854851	0.878983	0.898958	0.155295	0.194452	0.249177	0.28978	0.314774	0.324807	0.315084	0.273685	0.144627	0.26813	0.320368	0.381277	0.414011	0.418092	0.403167	0.362102	0.281916
30	Model1	1	4	0.496092	0.29026	0.174262	0.174262	0.174262	0.174263	0.174276	0.825736	0.825738	0.825737	0.825738	1	1	1	1	0.99999	1.63088e-05	5.0181e-06	0	0	0	0	0	5.29506e-07	1.87975e-05	0.999994	0.999999	0.999999	1	0.174262	0.174262	0.174262	0.174262	0.174264	0.371429	0.444444	0	0	0.296803	0.296803	0.296803	0.296803	0.296804	3.26162e-05	1.00361e-05	0
30	Model1	2	10	0.7785	0.547387	0.223324	0.286498	0.371193	0.449598	0.539891	0.615931	0.697718	0.744433	0.753196	0.968585	0.944068	0.914807	0.88149	0.832661	0.768382	0.660983	0.501443	0.250128	0.0724934	0.153415	0.261174	0.362189	0.480639	0.585078	0.705152	0.793611	0.85501	0.174474	0.184133	0.200378	0.218572	0.244983	0.272617	0.312102	0.329631	0.258789	0.295686	0.308162	0.328748	0.350287	0.378581	0.402448	0.424	0.397777
30	Model1	1	5	0.81696	0.654523	0.293135	0.293645	0.36052	0.512959	0.653711	0.774178	0.821973	0.843083	0.832934	0.983616	0.981862	0.969137	0.919848	0.834097	0.700724	0.566878	0.369404	0.127921	0.147418	0.148404	0.232079	0.42709	0.615642	0.789679	0.875808	0.943047	0.981718	0.195801	0.195702	0.21032	0.253083	0.314117	0.41284	0.490651	0.577849	0.596234	0.32659	0.326356	0.345632	0.396951	0.456368	0.51957	0.526017	0.450692
30	Model1	1	10	0.824432	0.652699	0.290286	0.291387	0.39763	0.714158	0.786212	0.823689	0.839254	0.83851	0.819667	0.995849	0.995388	0.969738	0.808952	0.688604	0.589952	0.448122	0.27192	0.0596264	0.141385	0.142816	0.276894	0.694153	0.806811	0.873016	0.921797	0.958082	0.980065	0.196638	0.196829	0.220588	0.358229	0.429297	0.495066	0.547369	0.577878	0.386959	0.328426	0.328666	0.359418	0.496564	0.528876	0.53836	0.492798	0.369821
30	Model1	3	5	0.788329	0.496581	0.189897	0.189941	0.194383	0.270593	0.338259	0.486827	0.634878	0.776158	0.833047	0.989776	0.989575	0.988613	0.973137	0.951366	0.884302	0.772547	0.543284	0.155952	0.0644055	0.064488	0.0697782	0.160372	0.242069	0.424468	0.613279	0.812693	0.939275	0.142348	0.142334	0.142908	0.153858	0.164528	0.194236	0.238625	0.31274	0.2872	0.248899	0.248871	0.249718	0.265706	0.28054	0.318511	0.364624	0.396967
30	Model1	2	7	0.804779	0.65971	0.352206	0.472665	0.591883	0.672956	0.733402	0.781319	0.820149	0.84484	0.849104	0.943299	0.910597	0.854847	0.80482	0.750896	0.685092	0.600099	0.483158	0.269893	0.232577	0.384034	0.538663	0.646268	0.729861	0.800794	0.864684	0.918039	0.966328	0.199211	0.23029	0.272736	0.31529	0.360026	0.410387	0.473002	0.544017	0.618639	0.328952	0.367611	0.413535	0.453084	0.486699	0.513296	0.529024	0.511785
30	Model1	1	9	0.87006	0.742408	0.297644	0.367124	0.47989	0.573959	0.708449	0.792935	0.836351	0.863549	0.839867	0.99444	0.986698	0.966122	0.932519	0.861104	0.791722	0.698891	0.511002	0.138931	0.150594	0.236371	0.377277	0.498289	0.676233	0.793191	0.865361	0.93795	0.987792	0.198122	0.21426	0.246656	0.281739	0.359503	0.446877	0.522779	0.634765	0.706023	0.330415	0.352069	0.392981	0.432737	0.507238	0.571294	0.598141	0.566199
30	Model1	2	2	0.79897	0.604514	0.182605	0.208993	0.390587	0.691395	0.744973	0.782884	0.813304	0.835155	0.836643	0.997186	0.993327	0.952109	0.62992	0.510429	0.420313	0.332382	0.227361	0.0632928	0.0177458	0.0502546	0.276943	0.703837	0.792441	0.856263	0.910636	0.958164	0.993158	0.170443	0.174695	0.210421	0.300925	0.332312	0.371786	0.429471	0.523784	0.651825	0.291125	0.297133	0.344669	0.407283	0.402548	0.394563	0.37474	0.317084
30	Model1	3	4	0.499902	0.200085	0.135978	0.135978	0.135978	0.864052	0.864052	0.864052	0.864052	0.864052	0.864052	0.999793	0.999793	0.999793	0.00021849	0.00021849	0.00021849	0.00021849	0.00021849	0.00021849	0.000455628	0.000455628	0.000455628	0.999577	0.999577	0.999577	0.999577	0.999577	0.999577	0.135641	0.135641	0.135641	0.0750274	0.0750274	0.0750274	0.0750274	0.0750274	0.0750274	0.238874	0.238874	0.238874	0.000435711	0.000435711	0.000435711	0.000435711	0.000435711
30	Model1	3	3	0.812492	0.526178	0.276938	0.38113	0.469829	0.559616	0.658632	0.768783	0.828472	0.859494	0.861199	0.980741	0.950781	0.906376	0.83766	0.727656	0.572726	0.400435	0.195279	0.0216991	0.166519	0.291758	0.40134	0.515994	0.647803	0.799542	0.895626	0.963701	0.992906	0.155838	0.173973	0.191939	0.213542	0.244792	0.309508	0.375745	0.457706	0.324284	0.268942	0.294127	0.316792	0.340326	0.366342	0.401851	0.387697	0.273759
30	Model1	3	2	0.821445	0.565473	0.201628	0.372705	0.515133	0.670784	0.785779	0.83187	0.861068	0.871774	0.864543	0.990227	0.954082	0.890187	0.776163	0.624331	0.504249	0.367625	0.19574	0.0213371	0.0779062	0.281494	0.456291	0.654251	0.811108	0.88327	0.938484	0.977836	0.996832	0.144188	0.172409	0.20437	0.260461	0.341477	0.403954	0.483891	0.580807	0.513806	0.251722	0.292044	0.332422	0.390036	0.441485	0.448564	0.41782	0.292802
30	Model1	3	8	0.846028	0.634848	0.181425	0.296482	0.416998	0.555205	0.67622	0.742959	0.788035	0.823936	0.840779	0.990058	0.97592	0.943395	0.885972	0.808389	0.743458	0.657578	0.527325	0.316641	0.0545598	0.189887	0.334413	0.503312	0.655484	0.742881	0.808502	0.870471	0.92301	0.141109	0.158956	0.181918	0.218659	0.269075	0.312072	0.350114	0.389763	0.392188	0.247012	0.273384	0.305018	0.350752	0.403758	0.439613	0.45694	0.448227
30	Model1	2	9	0.706088	0.477198	0.231369	0.339223	0.466972	0.592947	0.657124	0.697172	0.775959	0.785087	0.783512	0.9578	0.933011	0.861326	0.751331	0.607644	0.44989	0.226999	0.067282	0.024077	0.0843503	0.219049	0.38716	0.560892	0.667138	0.747219	0.88706	0.93036	0.93721	0.174715	0.194712	0.221454	0.257218	0.269784	0.264813	0.289155	0.163553	0.0720168	0.295522	0.322187	0.352323	0.383235	0.373666	0.333388	0.254335	0.0953423
30	Model1	1	3	0.776109	0.56891	0.231531	0.323315	0.415675	0.518877	0.677575	0.781189	0.809648	0.825795	0.825367	0.98289	0.961371	0.916699	0.831171	0.618137	0.3783	0.224585	0.0847344	0.00496918	0.0729654	0.188661	0.30994	0.45297	0.690119	0.866214	0.933119	0.982187	0.998503	0.182842	0.20004	0.218964	0.242801	0.296255	0.373725	0.414748	0.500975	0.411875	0.308327	0.331171	0.353492	0.375818	0.400542	0.375999	0.291386	0.144952
30	Model1	3	7	0.824707	0.605061	0.24259	0.383274	0.513747	0.679165	0.779172	0.832729	0.857688	0.869324	0.869618	0.978845	0.950559	0.894246	0.795871	0.693591	0.580426	0.473219	0.342635	0.154071	0.127081	0.294274	0.454052	0.660855	0.792598	0.872312	0.918007	0.951955	0.981879	0.149606	0.174452	0.204441	0.269096	0.344118	0.416284	0.475196	0.528045	0.571538	0.259544	0.2948	0.332798	0.402202	0.460007	0.484839	0.474205	0.415599
30	Model1	2	3	0.805631	0.611415	0.316205	0.390123	0.457023	0.581461	0.654878	0.718087	0.774425	0.817041	0.833564	0.973968	0.94404	0.902312	0.807527	0.709796	0.592582	0.437381	0.234048	0.0444188	0.183083	0.278019	0.366903	0.535708	0.643764	0.743488	0.842637	0.93503	0.993275	0.194389	0.209257	0.223872	0.260356	0.287369	0.318588	0.360008	0.421656	0.57206	0.324094	0.342577	0.358738	0.39376	0.409106	0.414389	0.394941	0.301014
30	Model1	1	8	0.862445	0.744532	0.329056	0.414258	0.544416	0.669068	0.795232	0.839321	0.8607	0.86671	0.852161	0.98958	0.970165	0.929236	0.871875	0.77121	0.680057	0.576377	0.441096	0.223267	0.18966	0.29694	0.463205	0.626268	0.800301	0.872932	0.920703	0.956531	0.984882	0.204909	0.225536	0.267573	0.329907	0.449036	0.530396	0.60536	0.681678	0.757089	0.339516	0.36599	0.415503	0.478685	0.567592	0.595975	0.590513	0.535612
30	Model1	2	8	0.845636	0.637944	0.178881	0.302489	0.383671	0.553638	0.645364	0.717298	0.750127	0.760822	0.751121	0.995682	0.979895	0.951344	0.867153	0.786806	0.682345	0.565552	0.411756	0.179686	0.0135724	0.165392	0.268782	0.490187	0.616738	0.724372	0.787482	0.831468	0.866771	0.169631	0.191995	0.20843	0.256086	0.293526	0.333789	0.350053	0.330864	0.214428	0.289877	0.32108	0.341943	0.395403	0.42755	0.448286	0.432443	0.366904
30	Model1	2	5	0.834449	0.640451	0.198377	0.345631	0.455266	0.607512	0.687453	0.732351	0.764811	0.779992	0.766677	0.986262	0.959888	0.920074	0.833882	0.76243	0.688185	0.576733	0.433359	0.127708	0.0389205	0.221314	0.361195	0.561698	0.672279	0.74129	0.802875	0.850146	0.895996	0.171972	0.199668	0.225705	0.278002	0.320117	0.349956	0.371908	0.369194	0.199046	0.292876	0.330573	0.362487	0.416987	0.450913	0.463973	0.452208	0.398712
30	Model1	1	7	0.862092	0.719572	0.209137	0.270019	0.389896	0.507384	0.602564	0.677846	0.72117	0.746862	0.745527	0.992542	0.982458	0.948355	0.899134	0.839975	0.764869	0.67936	0.551784	0.336688	0.0438084	0.119667	0.27204	0.424709	0.552461	0.659481	0.729994	0.788031	0.831808	0.179696	0.190624	0.215644	0.248028	0.283715	0.321588	0.346828	0.354572	0.296991	0.3043	0.319296	0.351387	0.388803	0.424163	0.452798	0.459216	0.431723
30	Model1	2	4	0.502161	0.28114	0.168325	0.168325	0.168325	0.168361	0.168456	0.831609	0.831639	0.831661	0.831678	1	1	1	0.999955	0.999881	9.82473e-05	6.42739e-05	3.30552e-05	6.88649e-06	5.85365e-06	5.94657e-06	6.1324e-06	5.78861e-05	0.000187317	0.999894	0.999938	0.99997	0.999996	0.168321	0.168321	0.168321	0.168322	0.16833	0.158284	0.173267	0.183206	0.25	0.288142	0.288142	0.288142	0.288141	0.288149	0.000196373	0.0001285	6.60984e-05
80	Model1	1	2	0.84964	0.764262	0.439519	0.673605	0.7196	0.75105	0.774753	0.792183	0.802439	0.802691	0.784281	0.967305	0.810776	0.718902	0.642756	0.567973	0.489004	0.399167	0.288281	0.132003	0.270779	0.629749	0.719823	0.785673	0.840864	0.889113	0.93137	0.967155	0.992823	0.2978	0.411802	0.450654	0.489485	0.532948	0.585047	0.650292	0.737265	0.854661	0.455399	0.546189	0.554016	0.555746	0.549903	0.532731	0.494684	0.414491
80	Model1	3	10	0.888707	0.7958	0.481646	0.649494	0.738725	0.785003	0.815994	0.837788	0.852724	0.86106	0.859797	0.962685	0.913609	0.861754	0.814787	0.764989	0.705192	0.631314	0.536123	0.396276	0.367742	0.586955	0.709593	0.77795	0.828071	0.869185	0.905151	0.938001	0.969553	0.264995	0.343723	0.412677	0.464915	0.513044	0.560722	0.61181	0.67187	0.755012	0.415592	0.499515	0.558094	0.592024	0.614183	0.624713	0.621409	0.596369
80	Model1	3	9	0.791691	0.558	0.241908	0.421431	0.549065	0.664893	0.75149	0.765535	0.753141	0.747546	0.748045	0.994514	0.943626	0.841496	0.697057	0.495579	0.256843	0.11438	0.0483749	0.0247448	0.0637006	0.297782	0.479821	0.657278	0.812086	0.885986	0.904392	0.913101	0.919313	0.200965	0.241384	0.276961	0.325052	0.384415	0.347862	0.220745	0.116462	0.0677004	0.334363	0.384429	0.416755	0.443358	0.432976	0.295503	0.150683	0.0683565
80	Model1	1	4	0.831348	0.750509	0.286427	0.37195	0.452477	0.68367	0.723554	0.752856	0.777829	0.797169	0.794289	0.97814	0.96582	0.940378	0.789297	0.718758	0.647348	0.562012	0.442231	0.230159	0.0652773	0.182083	0.296489	0.6499	0.725088	0.786589	0.846828	0.910648	0.974649	0.250692	0.274061	0.299405	0.418872	0.455305	0.492334	0.539823	0.612757	0.743764	0.399097	0.426966	0.454199	0.547298	0.557473	0.559299	0.550694	0.513712
80	Model1	2	10	0.891809	0.784372	0.420149	0.675652	0.742585	0.755205	0.75665	0.753299	0.745798	0.731537	0.711674	0.981953	0.87525	0.7451	0.619526	0.512054	0.410821	0.308183	0.187309	0.0538879	0.253478	0.616437	0.741839	0.795457	0.829215	0.854903	0.875626	0.892994	0.90682	0.280696	0.403687	0.461278	0.473287	0.470757	0.456516	0.423669	0.341806	0.146445	0.436591	0.552533	0.569802	0.536622	0.490538	0.432465	0.356814	0.242001
80	Model1	1	5	0.877525	0.795474	0.462729	0.632416	0.679546	0.701451	0.710608	0.711284	0.704101	0.6877	0.661303	0.956684	0.851026	0.761209	0.676459	0.592499	0.498015	0.388529	0.254306	0.102468	0.304805	0.562524	0.653438	0.709441	0.748369	0.779469	0.804993	0.826262	0.83997	0.305541	0.383455	0.412537	0.426715	0.429487	0.419278	0.389124	0.318789	0.169927	0.46316	0.528692	0.535085	0.523318	0.497992	0.455267	0.388826	0.28292
80	Model1	1	10	0.901923	0.851741	0.547849	0.728324	0.797758	0.824705	0.836498	0.839685	0.835896	0.821905	0.786876	0.968739	0.902271	0.829936	0.767093	0.698202	0.61439	0.511871	0.374738	0.163233	0.413285	0.672711	0.78747	0.843125	0.880712	0.911715	0.939491	0.96487	0.986263	0.345501	0.468477	0.555257	0.609885	0.651727	0.689916	0.730065	0.773267	0.791625	0.509344	0.616733	0.665362	0.679515	0.674165	0.649966	0.601801	0.504828
80	Model1	3	5	0.579825	0.327668	0.262592	0.491256	0.592197	0.663471	0.725616	0.751483	0.776105	0.780337	0.780939	0.990272	0.68371	0.43241	0.277896	0.159187	0.0810527	0.0290104	0.00623227	0.00518399	0.0902864	0.445686	0.630033	0.754769	0.859739	0.910232	0.953007	0.963635	0.964628	0.204933	0.226043	0.216762	0.21156	0.211815	0.17614	0.127533	0.0389981	0.0335386	0.339589	0.339758	0.288768	0.240233	0.181768	0.111019	0.0472685	0.0107471
80	Model1	2	7	0.904115	0.820629	0.386071	0.54927	0.637414	0.692704	0.727278	0.752588	0.770995	0.779923	0.768718	0.990251	0.956106	0.914888	0.86845	0.81594	0.748096	0.660396	0.536863	0.339956	0.206828	0.428573	0.555095	0.640566	0.700975	0.753921	0.803806	0.852033	0.89592	0.270278	0.331724	0.378907	0.417523	0.447366	0.47421	0.499652	0.518397	0.492132	0.424652	0.492555	0.535877	0.563927	0.577887	0.580468	0.568887	0.527468
80	Model1	1	9	0.889709	0.825181	0.56281	0.708298	0.774228	0.810893	0.827523	0.831619	0.827022	0.813336	0.787104	0.963332	0.903042	0.842765	0.773216	0.693519	0.600148	0.493389	0.365653	0.199382	0.434758	0.646036	0.752316	0.822939	0.870366	0.905623	0.933689	0.956467	0.975007	0.352701	0.449236	0.521039	0.582667	0.631052	0.670301	0.70404	0.728658	0.718349	0.516352	0.599994	0.643954	0.664552	0.660813	0.633288	0.580186	0.486947
80	Model1	2	2	0.513008	0.371399	0.228795	0.228795	0.771205	0.771205	0.771205	0.771205	0.771205	0.771205	0.771205	1	1	0	0	0	0	0	0	0	0	0	1	1	1	1	1	1	1	0.228795	0.228795	0	0	0	0	0	0	0	0.372389	0.372389	0	0	0	0	0	0
80	Model1	3	4	0.839284	0.708491	0.480924	0.592558	0.688512	0.748491	0.783285	0.807809	0.827498	0.841125	0.841015	0.913337	0.829445	0.737526	0.670354	0.614445	0.558189	0.491111	0.400258	0.252306	0.378535	0.536467	0.676907	0.766992	0.823264	0.866916	0.90715	0.945517	0.980414	0.258157	0.297608	0.350866	0.405196	0.45152	0.498279	0.556036	0.634977	0.7531	0.402536	0.438044	0.475514	0.50509	0.520532	0.526535	0.52156	0.491009
80	Model1	3	3	0.856721	0.697435	0.426329	0.51404	0.589078	0.682542	0.730596	0.772729	0.808643	0.833392	0.831633	0.97273	0.937535	0.885466	0.820044	0.752398	0.670693	0.566783	0.424396	0.190491	0.296949	0.413762	0.518897	0.649983	0.725433	0.79689	0.865912	0.930237	0.983447	0.246769	0.274668	0.303526	0.356814	0.393524	0.438801	0.500221	0.590242	0.731542	0.393669	0.424864	0.452084	0.497262	0.516766	0.530513	0.531426	0.493765
80	Model1	3	2	0.845931	0.694537	0.377711	0.673217	0.738257	0.779214	0.808112	0.827777	0.837332	0.835417	0.819694	0.974044	0.805609	0.69767	0.606557	0.519816	0.432585	0.33695	0.223785	0.0773762	0.236507	0.641869	0.747867	0.820097	0.876376	0.921353	0.955816	0.980243	0.995465	0.232002	0.347534	0.395846	0.443933	0.49891	0.565671	0.643588	0.728416	0.801584	0.374745	0.485589	0.505104	0.512657	0.509148	0.490257	0.442323	0.342382
80	Model1	3	8	0.871845	0.699442	0.339894	0.544727	0.661855	0.711232	0.741178	0.7613	0.786355	0.789012	0.771338	0.979482	0.919745	0.848102	0.782357	0.712364	0.628342	0.52229	0.370489	0.137355	0.188448	0.455928	0.617754	0.694391	0.748001	0.792783	0.848882	0.888113	0.921457	0.222264	0.285859	0.34442	0.377402	0.400969	0.41793	0.450059	0.439483	0.292831	0.362312	0.436159	0.489892	0.50918	0.513118	0.501978	0.483492	0.402048
80	Model1	2	9	0.864328	0.764709	0.454017	0.594091	0.682786	0.732192	0.763819	0.78495	0.797368	0.802177	0.7908	0.953971	0.914451	0.869603	0.826428	0.779444	0.721007	0.647501	0.546068	0.366473	0.305695	0.49905	0.627363	0.704234	0.759184	0.803921	0.841829	0.878157	0.916685	0.289583	0.351304	0.409097	0.453241	0.489856	0.521736	0.548426	0.570743	0.566153	0.444298	0.507602	0.556428	0.585418	0.601615	0.605395	0.59386	0.558133
80	Model1	1	3	0.843172	0.765684	0.523882	0.659095	0.722869	0.765564	0.795124	0.811262	0.813535	0.801603	0.774662	0.926136	0.841044	0.763145	0.68087	0.591193	0.490636	0.376209	0.239676	0.0810475	0.395276	0.600924	0.709992	0.792642	0.860323	0.91377	0.953354	0.981258	0.996419	0.328697	0.402553	0.456909	0.512146	0.575049	0.64528	0.720556	0.80348	0.87859	0.485193	0.544493	0.571594	0.584577	0.583009	0.557431	0.494325	0.369216
80	Model1	3	7	0.83856	0.690825	0.342048	0.559388	0.689474	0.778564	0.810794	0.827533	0.83524	0.827118	0.810764	0.973228	0.910739	0.807458	0.685625	0.566457	0.445412	0.325794	0.201886	0.0524411	0.192593	0.476192	0.661537	0.80057	0.86865	0.918014	0.95587	0.975165	0.990325	0.222042	0.291634	0.360978	0.448749	0.505235	0.562632	0.636113	0.658106	0.562071	0.361588	0.441797	0.498915	0.542456	0.534097	0.497207	0.430898	0.308985
80	Model1	2	3	0.852812	0.766668	0.358256	0.439067	0.553816	0.618579	0.67257	0.722616	0.767572	0.797336	0.795057	0.987172	0.969267	0.921222	0.868552	0.804374	0.719367	0.599524	0.420509	0.176431	0.171675	0.281771	0.444817	0.544419	0.633468	0.72358	0.817427	0.90913	0.978586	0.261209	0.285901	0.32988	0.361266	0.394329	0.435688	0.493464	0.578571	0.709662	0.413109	0.441557	0.4858	0.510284	0.529219	0.542692	0.541348	0.487037
80	Model1	1	8	0.887082	0.839266	0.58354	0.741011	0.806636	0.829916	0.838032	0.837274	0.827977	0.807116	0.7748	0.947701	0.880803	0.807029	0.729619	0.639571	0.538243	0.416874	0.263657	0.0894762	0.467054	0.696296	0.80651	0.861999	0.901515	0.932926	0.959477	0.980953	0.994016	0.362573	0.481245	0.571581	0.628416	0.675037	0.71964	0.766934	0.815764	0.827071	0.524487	0.622419	0.669199	0.675246	0.656826	0.615862	0.540146	0.398514
80	Model1	2	8	0.889961	0.804726	0.358203	0.462808	0.56455	0.653402	0.727058	0.775134	0.800519	0.814221	0.809717	0.986554	0.973428	0.948895	0.911285	0.857574	0.790249	0.717509	0.613409	0.426631	0.171789	0.311321	0.450526	0.576896	0.688337	0.77065	0.825146	0.873797	0.923368	0.261115	0.295446	0.338767	0.389862	0.449437	0.505492	0.549018	0.590494	0.622875	0.412937	0.453308	0.499284	0.546096	0.589782	0.616581	0.622056	0.601733
80	Model1	2	5	0.882748	0.780419	0.457394	0.668163	0.754491	0.784558	0.79703	0.800491	0.79762	0.786736	0.761536	0.969721	0.897866	0.802582	0.709911	0.616905	0.522114	0.420536	0.299451	0.132281	0.305401	0.600016	0.740224	0.806704	0.850468	0.883078	0.909491	0.931299	0.948218	0.292876	0.399744	0.478235	0.521433	0.550347	0.569852	0.579555	0.563913	0.431131	0.449879	0.553196	0.59934	0.601247	0.581728	0.54494	0.487403	0.391178
80	Model1	1	7	0.880068	0.824995	0.343184	0.437319	0.680164	0.718898	0.730766	0.732034	0.723401	0.703136	0.665572	0.981691	0.946848	0.812946	0.727983	0.638168	0.550369	0.43343	0.285056	0.0845429	0.139045	0.274416	0.637711	0.715993	0.760371	0.790115	0.816109	0.836801	0.851334	0.267157	0.294388	0.417728	0.450401	0.459881	0.456038	0.429731	0.358331	0.153843	0.420012	0.449134	0.551877	0.556498	0.534551	0.498783	0.431572	0.317521
80	Model1	2	4	0.73293	0.650391	0.391031	0.48908	0.572164	0.644015	0.70506	0.743614	0.768276	0.784158	0.786964	0.864775	0.81088	0.732454	0.64647	0.557992	0.46362	0.357009	0.23247	0.111415	0.250484	0.39361	0.52461	0.643287	0.748691	0.82668	0.890288	0.947828	0.98738	0.255006	0.284035	0.313703	0.34966	0.397122	0.442455	0.491193	0.569323	0.723697	0.393868	0.420706	0.43927	0.453846	0.464009	0.452791	0.413487	0.330137
10	Model2	1	2_5	0.888621	0.69938	0.210489	0.372467	0.505741	0.648282	0.772454	0.834796	0.875106	0.898386	0.900802	0.995626	0.971968	0.93348	0.883189	0.819108	0.739546	0.63699	0.494216	0.273797	0.104026	0.291176	0.44774	0.616429	0.766128	0.847712	0.907394	0.953191	0.985823	0.130948	0.156785	0.186462	0.237932	0.321995	0.397043	0.482591	0.588758	0.723662	0.231454	0.270015	0.310836	0.374873	0.462269	0.516689	0.549144	0.53736
10	Model2	2	2_3_4_5	0.876468	0.682567	0.149725	0.251678	0.370478	0.492136	0.607156	0.720884	0.832708	0.882269	0.899191	0.998929	0.989772	0.969509	0.935335	0.88308	0.806401	0.697299	0.541472	0.298717	0.0370375	0.153734	0.290988	0.433324	0.570542	0.709537	0.850676	0.927491	0.978873	0.120998	0.134349	0.153584	0.179673	0.214368	0.269221	0.382585	0.497725	0.652319	0.21585	0.236584	0.265162	0.30144	0.34499	0.403673	0.494083	0.518678
10	Model2	2	2_5	0.881088	0.691912	0.125216	0.227492	0.361311	0.492047	0.616559	0.748563	0.84458	0.887284	0.89903	0.999745	0.992673	0.971916	0.934457	0.876462	0.792746	0.676485	0.514779	0.267997	0.00916789	0.125954	0.280285	0.43334	0.582071	0.7427	0.866886	0.936714	0.982766	0.118081	0.130969	0.151965	0.179538	0.217703	0.290198	0.402759	0.51909	0.673583	0.211215	0.231408	0.262835	0.301206	0.348774	0.424866	0.504909	0.516926
10	Model2	1	2_3_4_5	0.884696	0.693611	0.194844	0.364336	0.487108	0.608027	0.729151	0.827516	0.873866	0.898684	0.900096	0.996398	0.973161	0.936515	0.887311	0.823757	0.740768	0.632158	0.481975	0.256039	0.0861552	0.281781	0.426169	0.570156	0.716323	0.839279	0.906641	0.955189	0.987429	0.128804	0.155213	0.181201	0.218695	0.282514	0.384605	0.478669	0.593241	0.734163	0.228119	0.267725	0.30365	0.350903	0.420734	0.506326	0.544809	0.531851
30	Model2	2	4	0.617345	0.356718	0.16832	0.16832	0.16832	0.170496	0.417488	0.798696	0.831513	0.83168	0.83168	1	1	1	0.999528	0.773724	0.0859714	0.00163715	0	0	0	0	0	0.00271201	0.345391	0.942942	0.999468	1	1	0.16832	0.16832	0.16832	0.168634	0.193036	0.233681	0.383936	0	0	0.28814	0.28814	0.28814	0.288581	0.308984	0.125698	0.0032604	0
30	Model2	1	2_4_5	0.916498	0.804774	0.354643	0.49345	0.57116	0.635519	0.699455	0.818037	0.859755	0.881173	0.848424	0.991237	0.966715	0.938587	0.903992	0.861162	0.80467	0.721928	0.578827	0.16608	0.220297	0.393573	0.493619	0.57886	0.665329	0.820858	0.888842	0.94498	0.992425	0.211539	0.251732	0.281177	0.31177	0.351927	0.486637	0.578168	0.689458	0.822282	0.348668	0.399448	0.432722	0.463639	0.49966	0.60649	0.6421	0.629317
30	Model2	2	3	0.825029	0.64464	0.243505	0.326214	0.398292	0.469601	0.60395	0.698916	0.796184	0.839184	0.83168	0.993636	0.975325	0.943979	0.894529	0.797084	0.675218	0.49823	0.248281	0	0.0916895	0.194843	0.287853	0.383602	0.564862	0.703712	0.856486	0.958774	1	0.181266	0.19689	0.211524	0.227027	0.270461	0.315641	0.412667	0.549319	0	0.306599	0.327639	0.345606	0.362144	0.40388	0.430185	0.45143	0.34199
30	Model2	1	2_5	0.916527	0.803634	0.366976	0.500562	0.57465	0.639921	0.711929	0.824407	0.863839	0.881495	0.850046	0.989916	0.964755	0.937133	0.903437	0.86064	0.803072	0.720679	0.581056	0.179598	0.235512	0.4026	0.498152	0.584309	0.680545	0.82891	0.894052	0.944899	0.991536	0.214619	0.254182	0.282684	0.314438	0.362471	0.497635	0.58941	0.689966	0.817455	0.352759	0.402357	0.434348	0.466509	0.510104	0.614491	0.648468	0.630845
30	Model2	1	2	0.834468	0.646448	0.262781	0.405396	0.494697	0.570558	0.687361	0.772161	0.824696	0.836951	0.825739	0.991882	0.954187	0.902369	0.829767	0.728064	0.600267	0.420706	0.169082	1.00362e-05	0.108913	0.28958	0.408663	0.515855	0.678771	0.808437	0.909954	0.977897	1	0.190224	0.220851	0.243593	0.265621	0.323555	0.398059	0.496474	0.6175	0.888889	0.319227	0.358684	0.383627	0.402421	0.448011	0.478685	0.455461	0.265474
30	Model2	3	2_3_5	0.914248	0.746975	0.325943	0.477826	0.584528	0.677239	0.751233	0.814058	0.864185	0.89431	0.885574	0.993777	0.973061	0.945207	0.9104	0.864903	0.802609	0.710767	0.555918	0.222664	0.221425	0.40032	0.52808	0.640749	0.733443	0.81585	0.888195	0.947269	0.989322	0.166501	0.202519	0.238652	0.283978	0.336787	0.40551	0.498728	0.622633	0.765449	0.285216	0.335261	0.381085	0.432917	0.484797	0.538798	0.586161	0.587387
30	Model2	3	4	0.500362	0.199858	0.135325	0.135325	0.135325	0.135325	0.136789	0.864675	0.864675	0.864675	0.864675	1	1	1	1	0.998213	0	0	0	0	0	0	0	0	0.00197364	1	1	1	1	0.135325	0.135325	0.135325	0.135325	0.135346	0	0	0	0	0.238389	0.238389	0.238389	0.238389	0.238372	0	0	0
30	Model2	3	2_4	0.83827	0.588438	0.187798	0.334077	0.454564	0.551213	0.671068	0.76313	0.834244	0.872578	0.864678	0.996641	0.972585	0.92868	0.867085	0.780252	0.68573	0.537139	0.286913	8.44946e-05	0.0612112	0.234148	0.380363	0.501778	0.65398	0.775243	0.880742	0.964237	0.99999	0.142476	0.165797	0.189994	0.214066	0.26085	0.323176	0.413453	0.556651	0.571429	0.249311	0.2833	0.315452	0.343363	0.390987	0.439311	0.467249	0.378656
30	Model2	2	2	0.823251	0.63662	0.172661	0.259271	0.347698	0.43761	0.588837	0.690787	0.792343	0.843853	0.83168	0.999814	0.990043	0.967708	0.929647	0.830334	0.728462	0.582649	0.291727	0	0.00525714	0.111373	0.222217	0.338028	0.539961	0.683162	0.834782	0.955595	1	0.169033	0.183995	0.201154	0.221319	0.267555	0.317554	0.416476	0.570746	0	0.289177	0.310319	0.333073	0.357523	0.404704	0.442299	0.485743	0.386104
30	Model2	1	3_4	0.80731	0.604709	0.246906	0.349375	0.431372	0.503016	0.628957	0.753025	0.810578	0.831627	0.825738	0.992985	0.962874	0.920269	0.860276	0.730397	0.574119	0.374333	0.130846	0	0.089455	0.219903	0.328196	0.42762	0.607549	0.790781	0.902642	0.979519	1	0.187088	0.206654	0.224259	0.240806	0.282005	0.366732	0.447948	0.574147	0	0.314854	0.340277	0.360635	0.376284	0.406905	0.447569	0.407845	0.213122
30	Model2	2	3_4	0.822225	0.639755	0.240767	0.335652	0.405504	0.486455	0.612718	0.700277	0.785267	0.838299	0.83168	0.993869	0.971138	0.937763	0.885611	0.790116	0.682858	0.522273	0.258076	0	0.0883505	0.207039	0.297782	0.405671	0.576816	0.703802	0.838493	0.955728	1	0.180756	0.198629	0.212767	0.2317	0.274241	0.318142	0.395575	0.541235	0	0.305882	0.329802	0.34684	0.367304	0.407161	0.434058	0.450179	0.3495
30	Model2	3	2	0.837699	0.586565	0.151329	0.309128	0.429622	0.532652	0.667253	0.771246	0.844576	0.873531	0.864675	0.999261	0.978114	0.940084	0.879213	0.780239	0.669959	0.502528	0.228868	0	0.0186251	0.20443	0.349733	0.478414	0.649571	0.787097	0.898108	0.974423	1	0.137452	0.161364	0.184509	0.208742	0.258413	0.329975	0.435624	0.583408	0	0.241662	0.277026	0.308474	0.337383	0.388241	0.442169	0.466691	0.328764
30	Model2	2	2_3_5	0.914409	0.798408	0.300941	0.419303	0.50686	0.588687	0.706077	0.778722	0.830378	0.866926	0.86872	0.995688	0.982677	0.963529	0.937948	0.903012	0.853029	0.778782	0.652247	0.338903	0.160334	0.305284	0.414437	0.518001	0.66622	0.763683	0.840821	0.910374	0.975948	0.193543	0.222561	0.249824	0.282554	0.353812	0.422148	0.49753	0.595607	0.740371	0.324089	0.362925	0.396772	0.434282	0.508419	0.564792	0.607167	0.622642
30	Model2	2	2_3_4_5	0.915354	0.797517	0.304553	0.424043	0.527338	0.650485	0.737355	0.795297	0.838464	0.867798	0.870315	0.995883	0.983293	0.962774	0.933135	0.893472	0.840327	0.764896	0.643056	0.378815	0.164638	0.310859	0.439212	0.593281	0.705759	0.786184	0.853353	0.913282	0.969788	0.194377	0.224067	0.257863	0.317095	0.380633	0.443022	0.513529	0.600126	0.717323	0.325268	0.364968	0.406778	0.473341	0.533841	0.580175	0.6145	0.62085
30	Model2	2	2_4	0.81901	0.623148	0.168457	0.248461	0.339906	0.433174	0.573018	0.691886	0.787416	0.84119	0.83168	0.999995	0.992023	0.970954	0.932326	0.834846	0.723072	0.584952	0.293192	0	0.000166132	0.0979745	0.21219	0.332153	0.520028	0.685575	0.828392	0.952097	1	0.168343	0.182056	0.199638	0.220293	0.260367	0.317601	0.408236	0.553311	0	0.288173	0.307652	0.331182	0.35638	0.396939	0.441346	0.480872	0.383286
30	Model2	2	4_5	0.901435	0.781001	0.215561	0.343052	0.486618	0.57964	0.640649	0.774982	0.826628	0.860819	0.854415	0.998429	0.9858	0.95505	0.921587	0.884497	0.832286	0.754264	0.621052	0.20679	0.0571199	0.212969	0.391814	0.510434	0.591298	0.763384	0.841273	0.909345	0.985485	0.176486	0.202233	0.241166	0.275878	0.304587	0.415848	0.490245	0.580974	0.74249	0.299952	0.335616	0.38509	0.424639	0.453133	0.554595	0.594249	0.600345
30	Model2	2	2_5	0.91218	0.7944	0.242987	0.395134	0.490559	0.566053	0.695632	0.765366	0.821365	0.861949	0.864511	0.998418	0.986017	0.96769	0.944708	0.911431	0.864866	0.792702	0.664884	0.295694	0.0900991	0.275548	0.393994	0.489419	0.651958	0.745228	0.827166	0.901832	0.979631	0.181719	0.215967	0.244243	0.272445	0.346403	0.407243	0.481393	0.578191	0.746068	0.307475	0.354327	0.39004	0.422923	0.50201	0.553743	0.599015	0.618515
30	Model2	3	2_3_4	0.855764	0.6125	0.264135	0.388979	0.481554	0.576484	0.683969	0.766598	0.831196	0.874585	0.86692	0.992842	0.967855	0.931356	0.880214	0.809119	0.715195	0.581994	0.353949	0.0250299	0.15009	0.298383	0.411158	0.528949	0.664383	0.774643	0.870197	0.956066	0.998678	0.154565	0.177558	0.198421	0.226273	0.273944	0.331854	0.412356	0.557688	0.747731	0.267488	0.300067	0.327145	0.360001	0.409308	0.453351	0.482704	0.433052
30	Model2	2	5	0.902041	0.782212	0.214474	0.348415	0.493754	0.583851	0.643118	0.774185	0.824304	0.859244	0.857468	0.998406	0.9852	0.953506	0.920894	0.885209	0.835563	0.7616	0.636006	0.242643	0.0558173	0.219539	0.400707	0.515638	0.594122	0.761764	0.836994	0.904424	0.9819	0.176283	0.20349	0.243574	0.277867	0.306229	0.415144	0.486017	0.573881	0.730682	0.299657	0.33731	0.388026	0.426917	0.455041	0.554693	0.593372	0.603349
30	Model2	3	3_4_5	0.909952	0.739326	0.324833	0.476554	0.582447	0.678614	0.751717	0.812089	0.859626	0.890438	0.885999	0.992137	0.968649	0.939231	0.903567	0.858476	0.797892	0.709914	0.563764	0.235225	0.220397	0.39954	0.526609	0.643408	0.735008	0.81431	0.883057	0.941563	0.987847	0.166089	0.201576	0.236938	0.283956	0.336436	0.402086	0.487197	0.601569	0.751809	0.284544	0.333708	0.378415	0.432115	0.48342	0.534712	0.577837	0.582054
30	Model2	3	3	0.826788	0.557222	0.238953	0.352304	0.436998	0.523113	0.633411	0.732069	0.820852	0.868547	0.864915	0.99294	0.968547	0.930935	0.872491	0.786529	0.674689	0.498664	0.248848	0.00251534	0.120951	0.25586	0.359695	0.468434	0.609448	0.741049	0.871275	0.965532	0.999883	0.150224	0.169228	0.185362	0.204378	0.239648	0.289654	0.377442	0.530499	0.7713	0.260965	0.288115	0.309165	0.331179	0.367364	0.405305	0.429667	0.33878
30	Model2	3	2_5	0.91094	0.741276	0.305702	0.488505	0.59178	0.68159	0.754846	0.813939	0.860695	0.890475	0.884874	0.993463	0.968232	0.939671	0.905324	0.859908	0.799605	0.711259	0.565613	0.222569	0.198065	0.413426	0.537334	0.646575	0.738403	0.816183	0.884082	0.941317	0.988527	0.162396	0.205298	0.241192	0.28617	0.339694	0.405041	0.48987	0.601349	0.752232	0.279159	0.338766	0.383857	0.434877	0.487005	0.537706	0.580162	0.582934
30	Model2	1	3_4_5	0.913898	0.799168	0.350272	0.478509	0.575718	0.656587	0.734926	0.825282	0.86122	0.880407	0.852751	0.990217	0.968037	0.939145	0.903359	0.858771	0.801366	0.71842	0.569812	0.204052	0.215219	0.375199	0.499021	0.604509	0.70879	0.830329	0.891356	0.945955	0.989651	0.210287	0.246405	0.283471	0.325255	0.383609	0.499186	0.582552	0.689926	0.806243	0.346904	0.392821	0.435493	0.478299	0.530324	0.61517	0.643392	0.624142
30	Model2	2	2_4_5	0.910932	0.791226	0.246499	0.390406	0.488093	0.56819	0.694862	0.765549	0.820631	0.861057	0.864928	0.998238	0.986626	0.968408	0.94361	0.909198	0.861595	0.790075	0.663702	0.307502	0.0943584	0.269739	0.390884	0.492211	0.651483	0.746111	0.826815	0.900999	0.977743	0.182391	0.214722	0.243435	0.273302	0.345539	0.407166	0.480057	0.575694	0.736571	0.308428	0.352688	0.389068	0.423844	0.500764	0.553	0.597231	0.616573
30	Model2	3	2_3	0.85883	0.618694	0.26007	0.382584	0.474048	0.574324	0.67227	0.765601	0.836912	0.875675	0.864675	0.993291	0.970929	0.937776	0.88912	0.819911	0.719517	0.569578	0.333867	0	0.145319	0.290506	0.401473	0.525057	0.649163	0.772813	0.878751	0.96047	1	0.153894	0.176393	0.196923	0.226595	0.267802	0.331397	0.423693	0.569301	0	0.266498	0.298548	0.325495	0.36115	0.403735	0.453788	0.485922	0.420898
30	Model2	3	2_4_5	0.909811	0.738627	0.30271	0.490352	0.596429	0.688507	0.758837	0.815332	0.859394	0.889447	0.886016	0.99285	0.967481	0.938091	0.90276	0.85736	0.797143	0.710916	0.567079	0.241713	0.1947	0.41568	0.542958	0.654976	0.743418	0.818179	0.882631	0.939898	0.986852	0.161744	0.2058	0.243128	0.290525	0.34338	0.406931	0.486641	0.596231	0.742081	0.278171	0.339403	0.386171	0.439584	0.490364	0.538808	0.577778	0.581289
30	Model2	1	3	0.804589	0.599088	0.248808	0.352061	0.432891	0.503439	0.653908	0.753431	0.810507	0.831641	0.825738	0.992493	0.962483	0.918879	0.857418	0.721508	0.56781	0.366672	0.128403	0	0.0918618	0.223238	0.330329	0.428736	0.639642	0.792604	0.904173	0.980051	1	0.187415	0.207291	0.224549	0.240555	0.297032	0.366199	0.446753	0.575982	0	0.315293	0.341116	0.360904	0.375703	0.42082	0.445245	0.40277	0.209993
30	Model2	1	2_3_4_5	0.917287	0.807466	0.341546	0.471198	0.564912	0.643405	0.726446	0.820676	0.864861	0.883654	0.846002	0.99266	0.972244	0.943732	0.907821	0.862513	0.801882	0.710373	0.554815	0.144923	0.204136	0.365459	0.484967	0.587603	0.69773	0.824642	0.897464	0.953051	0.993957	0.208374	0.244343	0.278864	0.317203	0.375854	0.491105	0.593839	0.71379	0.835014	0.344444	0.390537	0.430515	0.470135	0.523558	0.609145	0.6469	0.624342
30	Model2	1	3_5	0.914904	0.80265	0.334575	0.46382	0.563037	0.641935	0.717195	0.82065	0.86124	0.881509	0.851341	0.992127	0.971624	0.943906	0.909822	0.865828	0.80802	0.722523	0.573618	0.189262	0.195806	0.356653	0.482659	0.5854	0.685828	0.823316	0.890514	0.946486	0.991065	0.206573	0.241691	0.278003	0.316527	0.367729	0.491128	0.582061	0.69345	0.81719	0.341949	0.387093	0.429506	0.469659	0.516215	0.610925	0.64473	0.627868
30	Model2	2	3_4_5	0.910669	0.79276	0.292199	0.413572	0.503136	0.57633	0.677567	0.769733	0.825721	0.864957	0.859501	0.995015	0.980458	0.959322	0.933167	0.897075	0.845934	0.768722	0.630491	0.244909	0.149959	0.298842	0.41081	0.504111	0.633141	0.754311	0.837256	0.91241	0.983886	0.191529	0.220579	0.247852	0.275809	0.331055	0.410668	0.488745	0.592969	0.75466	0.321225	0.360137	0.393928	0.425775	0.483632	0.552917	0.597565	0.611154
30	Model2	1	2_3_5	0.919068	0.807017	0.389765	0.50985	0.597797	0.68043	0.784124	0.835195	0.868747	0.883647	0.852201	0.988044	0.964462	0.935688	0.900482	0.856152	0.796628	0.70924	0.558633	0.195098	0.263505	0.413909	0.526489	0.63399	0.768923	0.843334	0.90241	0.952237	0.990874	0.220649	0.257764	0.294296	0.341763	0.438804	0.517632	0.605324	0.711674	0.818573	0.360738	0.406805	0.447761	0.495477	0.580225	0.627516	0.653175	0.625935
30	Model2	3	3_5	0.909618	0.737753	0.332838	0.48054	0.590232	0.685018	0.75763	0.816597	0.861238	0.890038	0.887938	0.991533	0.968544	0.93956	0.903483	0.856787	0.794249	0.705878	0.563858	0.264905	0.22975	0.404165	0.535561	0.650828	0.742112	0.820095	0.885552	0.941086	0.985445	0.167683	0.202806	0.240472	0.288232	0.342085	0.408611	0.491162	0.599658	0.740149	0.286854	0.335385	0.382935	0.437039	0.48895	0.539612	0.579263	0.581208
30	Model2	2	2_3_4	0.84548	0.668076	0.252965	0.339309	0.410198	0.487288	0.598619	0.70716	0.789937	0.841968	0.83168	0.99479	0.978939	0.954561	0.916162	0.849301	0.750988	0.606812	0.367183	0	0.10283	0.209857	0.300027	0.40049	0.547885	0.698289	0.826998	0.938058	1	0.183278	0.200476	0.216298	0.236223	0.275458	0.334999	0.415163	0.545394	0	0.309529	0.332798	0.352681	0.375601	0.415995	0.463321	0.493018	0.438888
30	Model2	3	5	0.895721	0.71703	0.219762	0.415232	0.559429	0.658411	0.747268	0.812061	0.85346	0.883008	0.877715	0.995996	0.968207	0.926116	0.883326	0.835661	0.771428	0.682776	0.530093	0.153133	0.0982784	0.328689	0.502042	0.623211	0.733434	0.81842	0.880173	0.938241	0.991114	0.147387	0.184152	0.225448	0.268417	0.32914	0.399361	0.471392	0.573251	0.729512	0.256777	0.309448	0.362622	0.411723	0.472269	0.526274	0.557726	0.550828
30	Model2	1	2_3_4	0.846086	0.665621	0.302387	0.420398	0.507748	0.588758	0.697984	0.781214	0.827545	0.841458	0.825738	0.988177	0.957379	0.914692	0.848036	0.750201	0.62267	0.452196	0.207403	0	0.157659	0.307074	0.421868	0.534041	0.686964	0.814673	0.906757	0.975268	1	0.198445	0.225755	0.250315	0.277501	0.335884	0.414882	0.505799	0.638958	0	0.330517	0.365356	0.393064	0.418166	0.464016	0.497969	0.477498	0.313157
30	Model2	3	2_3_4_5	0.914904	0.74701	0.35457	0.500527	0.610401	0.698333	0.76582	0.821408	0.864701	0.89245	0.889471	0.992152	0.970145	0.942413	0.90819	0.863705	0.803933	0.717373	0.577984	0.28224	0.254542	0.42685	0.558312	0.665409	0.750463	0.82415	0.887815	0.941785	0.984738	0.172738	0.209834	0.250794	0.298662	0.351922	0.417671	0.500807	0.609018	0.743681	0.294246	0.345039	0.396162	0.449502	0.500083	0.549736	0.589839	0.593096
30	Model2	1	4_5	0.904638	0.78838	0.273252	0.438309	0.562938	0.619596	0.664935	0.817378	0.851124	0.873878	0.848204	0.994797	0.967453	0.928685	0.898875	0.861068	0.809287	0.740471	0.608987	0.175055	0.120978	0.326639	0.485751	0.560658	0.623543	0.819086	0.874475	0.92978	0.990264	0.192789	0.232664	0.275947	0.301566	0.325558	0.485607	0.554549	0.646672	0.791432	0.322985	0.375115	0.425471	0.451618	0.472478	0.606993	0.634164	0.627264
30	Model2	3	4_5	0.896817	0.718983	0.2516	0.430897	0.579864	0.662546	0.756711	0.811437	0.852249	0.881984	0.880557	0.995064	0.965549	0.923723	0.88273	0.835702	0.775885	0.692279	0.549374	0.193741	0.135245	0.347222	0.526049	0.628086	0.744349	0.817001	0.877284	0.934039	0.988046	0.152605	0.187976	0.23373	0.270849	0.338448	0.398875	0.468901	0.565873	0.71723	0.264626	0.314687	0.373063	0.414512	0.481781	0.526884	0.559104	0.557502
30	Model2	1	2_3	0.846406	0.66557	0.307467	0.420144	0.506727	0.591466	0.701183	0.783345	0.830111	0.841828	0.825741	0.987205	0.957272	0.913715	0.846713	0.751648	0.623203	0.443637	0.203894	3.13631e-05	0.164017	0.30679	0.420836	0.537599	0.690533	0.817141	0.911672	0.976457	0.999998	0.199496	0.225664	0.249781	0.278727	0.338878	0.418348	0.514555	0.646351	0.757576	0.331918	0.365229	0.392315	0.419394	0.467145	0.50063	0.476471	0.309998
30	Model2	1	4	0.739234	0.501594	0.174262	0.174262	0.174266	0.285364	0.549194	0.811234	0.824786	0.82574	0.825738	1	1	0.999999	0.959915	0.710104	0.201782	0.0370599	2.25815e-05	0	0	0	5.0303e-06	0.143008	0.515236	0.939851	0.991026	0.999997	1	0.174262	0.174262	0.174263	0.19119	0.236139	0.414511	0.465689	0.642857	0	0.296803	0.296803	0.296804	0.318869	0.354419	0.271432	0.0686562	4.51613e-05
30	Model2	1	2_4	0.835415	0.647983	0.255184	0.40224	0.495901	0.570187	0.679425	0.769347	0.822251	0.835406	0.825739	0.993237	0.956302	0.902931	0.828562	0.730296	0.609101	0.432262	0.165222	2.50905e-05	0.0994269	0.285311	0.410003	0.515661	0.668689	0.803165	0.904553	0.976841	0.999996	0.188807	0.220202	0.244126	0.265259	0.317492	0.395059	0.488689	0.600892	0.588235	0.317299	0.357975	0.384339	0.401864	0.442576	0.479268	0.458747	0.25918
30	Model2	2	2_3	0.84414	0.665434	0.251475	0.338006	0.410035	0.489762	0.592618	0.702146	0.788046	0.842937	0.83168	0.994737	0.979081	0.954735	0.914809	0.847649	0.750409	0.602635	0.351801	8.72289e-06	0.101049	0.208261	0.299795	0.403738	0.541004	0.692379	0.825571	0.942336	0.999999	0.182973	0.200176	0.216273	0.236937	0.272068	0.330521	0.411495	0.55252	0.542857	0.309092	0.332393	0.352659	0.376389	0.411922	0.458912	0.489052	0.429885
30	Model2	1	5	0.90439	0.78695	0.267953	0.436534	0.56167	0.618894	0.664502	0.816627	0.850547	0.873536	0.84789	0.995208	0.967836	0.928892	0.899124	0.861428	0.809971	0.740513	0.608691	0.175956	0.114475	0.324409	0.484172	0.559754	0.622943	0.818032	0.873768	0.929429	0.989693	0.191709	0.232145	0.27538	0.301192	0.3253	0.484368	0.553175	0.645421	0.782745	0.321488	0.374469	0.424818	0.451229	0.472261	0.606215	0.63328	0.626518
30	Model2	3	3_4	0.825693	0.554147	0.231978	0.350301	0.437911	0.521695	0.634404	0.728795	0.818928	0.868711	0.864688	0.993552	0.968734	0.929681	0.870912	0.784456	0.675492	0.49973	0.2417	0.000116993	0.11279	0.253514	0.360947	0.467041	0.61092	0.737138	0.868883	0.966841	0.999996	0.149126	0.168813	0.185454	0.203659	0.239855	0.286822	0.373624	0.532878	0.808989	0.259328	0.287522	0.309224	0.33012	0.36738	0.402667	0.427573	0.332559
30	Model2	2	3_5	0.912152	0.796428	0.29457	0.418	0.509255	0.58359	0.680878	0.77417	0.828473	0.866108	0.862375	0.994949	0.980294	0.95844	0.931306	0.895557	0.846001	0.771295	0.636831	0.26917	0.152823	0.3042	0.418346	0.513218	0.63743	0.759632	0.840045	0.912511	0.982432	0.192042	0.221872	0.250087	0.279124	0.333288	0.415997	0.4939	0.595658	0.756146	0.321943	0.361846	0.39667	0.429517	0.485787	0.55774	0.602188	0.615557
80	Model2	2	4	0.812415	0.719155	0.236268	0.269404	0.322946	0.41409	0.583922	0.732607	0.792763	0.802973	0.772632	0.999688	0.996525	0.984532	0.929593	0.810465	0.631676	0.470948	0.297891	0.0109667	0.00978299	0.0536882	0.126672	0.261155	0.516713	0.76255	0.888236	0.952816	0.998596	0.230478	0.238045	0.250626	0.271807	0.332226	0.441097	0.555576	0.651931	0.698603	0.374594	0.384292	0.399543	0.420626	0.47127	0.519458	0.509774	0.408928
80	Model2	1	2_4_5	0.931528	0.887408	0.482334	0.601312	0.690485	0.789733	0.826803	0.848749	0.863873	0.865347	0.810813	0.985196	0.955281	0.918663	0.878661	0.834665	0.782299	0.709135	0.57548	0.244239	0.321563	0.488144	0.617534	0.761301	0.824289	0.869993	0.913345	0.958022	0.991955	0.317067	0.373702	0.434368	0.540627	0.602971	0.657983	0.723477	0.814229	0.906592	0.479739	0.537238	0.589843	0.669389	0.700148	0.714776	0.716234	0.674346
80	Model2	2	3	0.8634	0.781559	0.337594	0.411383	0.477089	0.548545	0.63159	0.700212	0.784838	0.82053	0.771205	0.992193	0.972907	0.942938	0.899707	0.83503	0.751074	0.600882	0.38151	0	0.143393	0.244795	0.338885	0.444365	0.571235	0.685123	0.839413	0.950775	1	0.255747	0.276512	0.297327	0.324499	0.366196	0.414399	0.526085	0.696904	0	0.406671	0.430633	0.452099	0.476969	0.509121	0.534108	0.561001	0.493086
80	Model2	1	2_5	0.930144	0.886372	0.469396	0.588509	0.670758	0.768697	0.820491	0.844133	0.859659	0.865024	0.816324	0.986426	0.956946	0.919775	0.880291	0.838267	0.787427	0.717772	0.592887	0.2697	0.304095	0.470715	0.591144	0.733019	0.814808	0.862262	0.905023	0.95203	0.991087	0.311856	0.366303	0.418346	0.513183	0.591365	0.646363	0.707274	0.79804	0.906315	0.473892	0.529805	0.575111	0.64838	0.693495	0.709955	0.712484	0.680334
80	Model2	1	2	0.873354	0.797552	0.425982	0.50566	0.562109	0.644824	0.750462	0.80127	0.823188	0.811755	0.766505	0.981086	0.949517	0.90662	0.836731	0.734434	0.614431	0.47584	0.284781	0.0387869	0.248508	0.363754	0.451964	0.583469	0.755586	0.861005	0.93424	0.980235	0.999166	0.294479	0.323012	0.345937	0.391077	0.489977	0.58563	0.6982	0.821638	0.93699	0.45299	0.482041	0.500789	0.533025	0.587803	0.599685	0.565962	0.422963
80	Model2	3	2_3_5	0.922436	0.831203	0.423104	0.527794	0.611141	0.695233	0.763443	0.815708	0.856603	0.877767	0.862881	0.991288	0.972388	0.945408	0.9108	0.865857	0.80751	0.725436	0.593316	0.348907	0.288565	0.422519	0.531991	0.644189	0.739192	0.817649	0.887661	0.945121	0.984583	0.248081	0.285057	0.323558	0.377383	0.440124	0.511854	0.604598	0.719099	0.842734	0.396846	0.440872	0.482116	0.533651	0.583599	0.626555	0.659528	0.65018
80	Model2	3	4	0.847054	0.709495	0.278325	0.394413	0.477333	0.5613	0.687032	0.767063	0.815971	0.841713	0.821347	0.993647	0.969694	0.934055	0.878998	0.76418	0.653105	0.532909	0.384395	0.0838804	0.108946	0.258194	0.369187	0.486073	0.668765	0.794047	0.882997	0.95	0.995969	0.208892	0.236367	0.259596	0.288251	0.353287	0.428859	0.51888	0.64544	0.831292	0.345211	0.380086	0.406278	0.434136	0.483191	0.517743	0.525801	0.481832
80	Model2	3	2_4	0.887272	0.763469	0.346812	0.459107	0.541615	0.637379	0.711544	0.776528	0.826972	0.854036	0.829796	0.991357	0.970814	0.941532	0.897311	0.835315	0.749613	0.631532	0.44569	0.132557	0.194192	0.337941	0.44692	0.57583	0.682237	0.782901	0.87325	0.950727	0.994893	0.225593	0.257727	0.287289	0.333738	0.383648	0.449822	0.54124	0.681712	0.860052	0.367547	0.407321	0.440246	0.486523	0.525802	0.562252	0.58291	0.538996
80	Model2	2	2	0.565402	0.433967	0.228795	0.228795	0.228842	0.242767	0.564932	0.771078	0.771449	0.771237	0.771205	1	1	0.999983	0.983212	0.45141	0.0183831	0.00299182	0.000327512	0	0	0	6.61139e-05	0.0230984	0.59861	0.994381	0.999429	0.999944	1	0.228795	0.228795	0.228803	0.229933	0.250173	0.492519	0.60844	0.634615	0	0.372389	0.372389	0.372399	0.372705	0.321931	0.0354432	0.00595435	0.000654686
80	Model2	1	3_4	0.882008	0.805339	0.398125	0.474809	0.54167	0.661642	0.74454	0.797767	0.825354	0.822046	0.772229	0.986416	0.96183	0.925336	0.874681	0.801808	0.701208	0.562509	0.376269	0.0675022	0.21004	0.319102	0.419006	0.59353	0.726231	0.828638	0.90939	0.964567	0.99754	0.285318	0.311116	0.337397	0.407579	0.483569	0.566773	0.664966	0.772472	0.897673	0.442611	0.470155	0.494492	0.556052	0.603293	0.626864	0.609461	0.506045
80	Model2	2	3_4	0.875691	0.792246	0.326953	0.403636	0.468523	0.539428	0.619054	0.718041	0.798816	0.821671	0.777439	0.995419	0.980886	0.957109	0.921934	0.871169	0.790848	0.641083	0.389956	0.0367382	0.128639	0.232382	0.323574	0.42595	0.544259	0.696442	0.845611	0.949749	0.997183	0.253123	0.274887	0.295663	0.322704	0.361878	0.435954	0.55195	0.697172	0.794626	0.403613	0.42943	0.451769	0.47807	0.511347	0.562069	0.593187	0.500156
80	Model2	3	2	0.866099	0.720633	0.315172	0.431097	0.507245	0.608252	0.676729	0.755593	0.82457	0.844235	0.808547	0.992318	0.970316	0.940064	0.882091	0.818627	0.719336	0.568236	0.380975	0	0.154833	0.303417	0.404759	0.543411	0.643129	0.764178	0.885267	0.953929	1	0.217536	0.248028	0.272175	0.313871	0.351981	0.419374	0.539749	0.661939	0	0.356844	0.395069	0.422132	0.462996	0.492294	0.529847	0.553626	0.483611
80	Model2	2	2_3_5	0.925661	0.87497	0.358763	0.453577	0.518826	0.587145	0.660196	0.761308	0.826138	0.857313	0.818067	0.995979	0.984354	0.967761	0.941997	0.90456	0.854873	0.779577	0.638349	0.241279	0.16972	0.29611	0.385639	0.481871	0.5877	0.733549	0.839951	0.922274	0.989183	0.26247	0.293226	0.318488	0.350384	0.394261	0.487661	0.59101	0.709006	0.868725	0.415456	0.451852	0.479255	0.510779	0.549164	0.621047	0.672322	0.671825
80	Model2	2	2_3_4_5	0.924234	0.872849	0.228795	0.350773	0.454551	0.532344	0.639877	0.77458	0.848592	0.831744	0.771205	1	0.996336	0.983475	0.960215	0.913164	0.838081	0.693151	0.318879	0	0	0.159253	0.297635	0.405407	0.558801	0.755741	0.894707	0.983897	1	0.228795	0.260122	0.29349	0.323912	0.380433	0.504438	0.661362	0.854539	0	0.372389	0.412538	0.452072	0.484415	0.537103	0.629801	0.676884	0.464446
80	Model2	2	2_4	0.811921	0.71822	0.245368	0.288373	0.353485	0.488384	0.622399	0.72006	0.784788	0.802431	0.774546	0.999	0.993503	0.972924	0.89029	0.779244	0.647921	0.495303	0.309754	0.0278665	0.0217863	0.0791809	0.169716	0.36915	0.575868	0.741461	0.870669	0.948594	0.996065	0.232526	0.242475	0.257961	0.295119	0.352778	0.426436	0.531873	0.641275	0.677503	0.377245	0.389812	0.407799	0.443292	0.485679	0.514348	0.512937	0.417732
80	Model2	2	4_5	0.918946	0.862731	0.228795	0.283976	0.467488	0.562529	0.633222	0.726844	0.835467	0.842078	0.771205	1	0.998829	0.980088	0.950531	0.908266	0.83311	0.702945	0.450864	0	0	0.071899	0.315414	0.44742	0.551624	0.695318	0.874783	0.95814	1	0.228795	0.242011	0.298112	0.337891	0.375375	0.447882	0.624829	0.761643	0	0.372389	0.389619	0.457168	0.498557	0.531208	0.582572	0.661589	0.566425
80	Model2	2	2_5	0.91447	0.859966	0.296682	0.451684	0.546801	0.601817	0.65824	0.73981	0.808855	0.840978	0.822795	0.997536	0.978949	0.953129	0.92616	0.894727	0.848976	0.780057	0.668338	0.28669	0.0887581	0.29526	0.426255	0.505593	0.588081	0.707423	0.817399	0.892195	0.981841	0.24515	0.291837	0.330137	0.357222	0.391875	0.462613	0.558958	0.647791	0.824064	0.393576	0.449633	0.49041	0.515583	0.545034	0.598888	0.651253	0.657904
80	Model2	3	2_3_4	0.89684	0.779499	0.389594	0.479056	0.557884	0.637927	0.707757	0.776596	0.833898	0.86093	0.837506	0.990711	0.972062	0.94452	0.906537	0.853673	0.775572	0.656826	0.479199	0.181639	0.247258	0.362319	0.466334	0.574323	0.673206	0.776839	0.875826	0.951319	0.992807	0.237598	0.26522	0.295319	0.335226	0.382163	0.451431	0.556048	0.699777	0.856715	0.383276	0.416736	0.449953	0.489457	0.527971	0.570687	0.60225	0.568854
80	Model2	2	5	0.914587	0.860049	0.299169	0.456189	0.548168	0.602142	0.6583	0.739116	0.807974	0.841239	0.825887	0.997416	0.978176	0.952461	0.925754	0.894639	0.849472	0.781297	0.668754	0.307156	0.0920193	0.30133	0.428225	0.506136	0.588186	0.706376	0.815889	0.892411	0.979779	0.245791	0.293464	0.330743	0.357374	0.391912	0.461871	0.557318	0.648389	0.818396	0.394393	0.451479	0.49099	0.515678	0.545053	0.598388	0.650569	0.658414
80	Model2	3	3_4_5	0.920502	0.828119	0.43923	0.549498	0.631798	0.705026	0.765292	0.81464	0.851618	0.875023	0.864227	0.987155	0.965102	0.93997	0.908619	0.867005	0.81228	0.737323	0.617798	0.364284	0.309489	0.451088	0.558826	0.656818	0.741208	0.815199	0.878682	0.93593	0.982607	0.252901	0.293945	0.335328	0.385343	0.442363	0.509991	0.590012	0.695423	0.832195	0.402647	0.450638	0.494313	0.541175	0.585826	0.626582	0.655493	0.654316
80	Model2	3	3	0.863645	0.717568	0.363408	0.446101	0.511497	0.58723	0.663733	0.734432	0.801736	0.841368	0.814915	0.988321	0.965769	0.932798	0.884877	0.823279	0.735326	0.597461	0.407971	0.0386171	0.215436	0.323051	0.411739	0.516751	0.625954	0.73422	0.850106	0.943991	0.998732	0.229751	0.252511	0.272976	0.302446	0.342611	0.395811	0.485546	0.632994	0.878255	0.372832	0.400347	0.422353	0.450808	0.483862	0.514616	0.535721	0.496161
80	Model2	3	2_5	0.917584	0.822477	0.38579	0.52404	0.601687	0.685922	0.760185	0.817171	0.853642	0.871453	0.853803	0.991185	0.970246	0.943112	0.907748	0.859567	0.794734	0.708875	0.581245	0.290965	0.242441	0.418385	0.520842	0.633396	0.736653	0.822484	0.88792	0.94017	0.987075	0.236531	0.283157	0.3179	0.369606	0.435944	0.514583	0.599618	0.697004	0.842039	0.381922	0.438378	0.475515	0.525319	0.578495	0.624687	0.649685	0.633883
80	Model2	1	3_4_5	0.932113	0.888617	0.443445	0.541844	0.686562	0.769703	0.816711	0.848369	0.868128	0.8649	0.816842	0.990391	0.969682	0.939992	0.902876	0.856194	0.79671	0.706835	0.556699	0.271928	0.268579	0.405059	0.605538	0.727126	0.804088	0.864885	0.919695	0.963435	0.991058	0.302121	0.342578	0.43242	0.514057	0.582854	0.653404	0.737814	0.829574	0.906741	0.463002	0.50629	0.592346	0.655119	0.693564	0.717976	0.721992	0.66628
80	Model2	2	2_4_5	0.919355	0.862063	0.289925	0.438671	0.542327	0.604399	0.666966	0.754086	0.81531	0.845248	0.820093	0.998747	0.98535	0.960613	0.931875	0.897828	0.852298	0.783877	0.650281	0.272149	0.0796373	0.276486	0.418234	0.507246	0.598475	0.724949	0.824635	0.903089	0.982653	0.243535	0.287767	0.328798	0.359406	0.398811	0.478975	0.570098	0.66563	0.823144	0.391585	0.445444	0.48991	0.518743	0.552295	0.613292	0.660111	0.657866
80	Model2	3	2_3	0.887631	0.758955	0.384555	0.470881	0.544897	0.625049	0.694249	0.766888	0.825941	0.854321	0.83428	0.989931	0.970836	0.943287	0.90351	0.846991	0.762721	0.64122	0.451572	0.162474	0.24121	0.352499	0.450564	0.559113	0.658082	0.767874	0.86968	0.949686	0.993355	0.236009	0.262008	0.289026	0.326712	0.369707	0.437582	0.538123	0.680019	0.852722	0.381149	0.41265	0.442477	0.479893	0.514735	0.556114	0.585165	0.542736
80	Model2	3	2_4_5	0.92092	0.828023	0.410645	0.537135	0.622901	0.705257	0.766594	0.818037	0.854653	0.87427	0.859737	0.990608	0.969981	0.942801	0.909135	0.865506	0.805812	0.7233	0.598419	0.331295	0.273318	0.434643	0.547153	0.656981	0.743173	0.820932	0.885756	0.939588	0.984865	0.24402	0.288891	0.330197	0.38559	0.443817	0.515867	0.599862	0.701092	0.83827	0.39158	0.44519	0.489097	0.541511	0.586756	0.629036	0.655823	0.645699
80	Model2	1	3	0.859655	0.773479	0.394532	0.466044	0.515988	0.613494	0.703156	0.774613	0.809209	0.809098	0.760271	0.984765	0.955922	0.918567	0.857918	0.768812	0.63786	0.475099	0.314873	0.0116047	0.205827	0.309423	0.387278	0.535348	0.682164	0.818334	0.916028	0.967109	0.999629	0.283893	0.306787	0.324005	0.371191	0.436097	0.528873	0.643986	0.753733	0.90916	0.440731	0.464501	0.479039	0.518183	0.556517	0.578276	0.546799	0.444186
80	Model2	1	2_3_4_5	0.933678	0.891193	0.471513	0.569057	0.698765	0.790166	0.831091	0.857586	0.873028	0.868027	0.816714	0.987221	0.963339	0.931107	0.890389	0.842951	0.783787	0.697843	0.561665	0.269597	0.306634	0.443	0.624482	0.758123	0.827299	0.881181	0.929036	0.965976	0.991635	0.312814	0.356064	0.442194	0.540635	0.609454	0.678351	0.758687	0.840707	0.911534	0.47509	0.519947	0.599621	0.67277	0.707433	0.727267	0.726994	0.673424
80	Model2	1	3_5	0.930506	0.886842	0.432143	0.530992	0.642551	0.75697	0.808682	0.841859	0.863316	0.86478	0.818801	0.990996	0.970581	0.941111	0.903021	0.856775	0.799931	0.714489	0.566002	0.282035	0.253471	0.39045	0.547098	0.710275	0.793306	0.855264	0.910898	0.960303	0.990412	0.297955	0.337343	0.399165	0.499121	0.569939	0.638598	0.719393	0.820096	0.903891	0.458159	0.500669	0.560569	0.642897	0.684524	0.710218	0.716932	0.669759
80	Model2	2	3_4_5	0.928648	0.878311	0.375722	0.466352	0.533815	0.60595	0.692541	0.780362	0.835634	0.862341	0.831715	0.995142	0.983734	0.967187	0.94368	0.909056	0.860363	0.785686	0.649843	0.321249	0.191958	0.31286	0.405245	0.505756	0.628307	0.756628	0.850452	0.925383	0.983156	0.267595	0.29811	0.325439	0.361612	0.420483	0.511906	0.609167	0.720961	0.849805	0.421774	0.457561	0.487009	0.522866	0.575	0.641893	0.686258	0.683557
80	Model2	1	2_3_5	0.934443	0.893269	0.47538	0.570382	0.705614	0.788528	0.829274	0.856015	0.872953	0.870191	0.825107	0.986737	0.962766	0.929981	0.890589	0.844462	0.787284	0.705408	0.574316	0.308222	0.311892	0.444932	0.63388	0.755898	0.824418	0.877989	0.92652	0.964786	0.990362	0.314347	0.356724	0.448155	0.538415	0.605937	0.673519	0.754254	0.839082	0.910904	0.476799	0.520567	0.60484	0.671106	0.705586	0.725972	0.729014	0.6819
80	Model2	3	3_5	0.918824	0.82583	0.393639	0.5099	0.590006	0.676633	0.754594	0.810159	0.853853	0.875291	0.858855	0.991266	0.971681	0.944145	0.907628	0.860724	0.801268	0.716651	0.578698	0.321359	0.252128	0.400556	0.506151	0.621936	0.729463	0.812265	0.886341	0.945521	0.986127	0.238878	0.277365	0.311623	0.362432	0.429662	0.502642	0.598878	0.715524	0.845798	0.384981	0.431546	0.468585	0.518012	0.573194	0.617759	0.652492	0.639878
80	Model2	2	2_3_4	0.877222	0.797579	0.308847	0.386368	0.449661	0.522346	0.611305	0.716289	0.807133	0.820837	0.771209	0.997199	0.984827	0.96464	0.930163	0.875675	0.782326	0.619677	0.338238	3.0676e-05	0.104633	0.208823	0.296881	0.401358	0.532874	0.696698	0.862745	0.96401	0.999995	0.248353	0.269692	0.289276	0.315521	0.357384	0.433499	0.572542	0.736021	0.653846	0.397667	0.423429	0.445081	0.471204	0.507604	0.557872	0.595178	0.463482
80	Model2	3	5	0.902316	0.800784	0.305963	0.49717	0.590927	0.665675	0.747788	0.803186	0.840505	0.858516	0.849755	0.992695	0.960332	0.927198	0.886429	0.838719	0.771342	0.685199	0.572402	0.279679	0.143354	0.3875	0.511303	0.613404	0.726257	0.810727	0.87728	0.926264	0.984742	0.215312	0.270741	0.309989	0.351883	0.420455	0.491087	0.569352	0.647657	0.812745	0.353871	0.422398	0.464636	0.503781	0.560119	0.600107	0.621927	0.607709
80	Model2	1	2_3_4	0.893214	0.823117	0.428288	0.511448	0.590993	0.701496	0.77437	0.819852	0.838085	0.827166	0.777965	0.985551	0.957891	0.919977	0.866739	0.791194	0.688095	0.553746	0.37191	0.0923605	0.250124	0.368715	0.485812	0.648666	0.768991	0.861977	0.928992	0.972718	0.997162	0.295871	0.326655	0.363878	0.440944	0.522674	0.614478	0.713734	0.813374	0.912325	0.455113	0.487176	0.521491	0.58452	0.629495	0.649206	0.623643	0.51043
80	Model2	3	2_3_4_5	0.923445	0.833377	0.419486	0.533041	0.617958	0.699819	0.766435	0.817729	0.855655	0.878008	0.862147	0.99101	0.971322	0.944674	0.910522	0.866156	0.808833	0.731955	0.60724	0.342065	0.284157	0.429262	0.540596	0.649927	0.742823	0.819836	0.884945	0.942123	0.985295	0.246878	0.287232	0.327462	0.381138	0.443666	0.515277	0.60102	0.713002	0.846345	0.395284	0.443357	0.486339	0.537347	0.586773	0.629514	0.660057	0.655885
80	Model2	1	4_5	0.928348	0.88025	0.433533	0.552837	0.677607	0.767071	0.807685	0.834102	0.850592	0.856588	0.81515	0.990914	0.965781	0.93681	0.902254	0.858805	0.804005	0.733366	0.617432	0.277409	0.255331	0.420813	0.594736	0.723851	0.791341	0.843725	0.88807	0.933049	0.987073	0.29846	0.347733	0.424974	0.510904	0.5682	0.621908	0.676874	0.746735	0.872788	0.458747	0.511352	0.584703	0.652391	0.683912	0.701329	0.703989	0.675955
80	Model2	3	4_5	0.914286	0.817784	0.366711	0.5218	0.607341	0.694847	0.756846	0.809263	0.846482	0.865956	0.854367	0.991254	0.966434	0.937315	0.902447	0.857534	0.795849	0.711427	0.585809	0.301098	0.218827	0.416517	0.529208	0.64569	0.733004	0.81244	0.878461	0.932291	0.985374	0.231045	0.28171	0.320387	0.376212	0.431982	0.501179	0.580894	0.671987	0.82978	0.374743	0.436254	0.477543	0.531043	0.57454	0.615041	0.639568	0.625946
80	Model2	1	2_3	0.886836	0.813472	0.428934	0.50745	0.573386	0.678392	0.76414	0.813723	0.832046	0.82054	0.77372	0.984801	0.956667	0.918109	0.860628	0.778131	0.667436	0.523336	0.337942	0.0720245	0.251216	0.36383	0.463174	0.620129	0.759667	0.860493	0.930744	0.974833	0.998061	0.296016	0.324681	0.3535	0.420067	0.508633	0.604678	0.707254	0.811072	0.922331	0.455204	0.48482	0.510458	0.56457	0.615161	0.634509	0.601551	0.477097
80	Model2	1	4	0.868096	0.789049	0.324598	0.423822	0.496986	0.562283	0.719982	0.798626	0.818447	0.812636	0.75774	0.995393	0.977873	0.94672	0.893451	0.757615	0.64265	0.51499	0.333948	0	0.110136	0.246685	0.3532	0.456405	0.707951	0.848494	0.915466	0.965679	1	0.263421	0.293295	0.318784	0.344468	0.453366	0.575577	0.660755	0.756741	0	0.416595	0.451247	0.476963	0.49723	0.56727	0.607267	0.578837	0.463399
80	Model2	1	2_4	0.890045	0.820883	0.429282	0.517702	0.586881	0.685479	0.761385	0.811553	0.833224	0.823274	0.76901	0.983827	0.953933	0.914539	0.858468	0.780282	0.673559	0.533396	0.345823	0.050353	0.251986	0.378234	0.482125	0.630172	0.755343	0.855671	0.929083	0.975922	0.998775	0.296024	0.32909	0.360857	0.425992	0.504866	0.598724	0.706289	0.821168	0.929264	0.45511	0.48936	0.517514	0.569423	0.613062	0.63394	0.607786	0.486685
80	Model2	2	2_3	0.863703	0.781453	0.338568	0.405228	0.470974	0.54376	0.631983	0.7098	0.787164	0.820429	0.771205	0.992087	0.975356	0.947469	0.902584	0.833173	0.734706	0.586379	0.388797	0	0.144688	0.236087	0.329612	0.437307	0.572296	0.702411	0.846731	0.948482	1	0.256015	0.274725	0.295422	0.322435	0.366254	0.422779	0.531618	0.691255	0	0.407	0.428699	0.450407	0.475135	0.508831	0.536713	0.557657	0.497676
80	Model2	1	5	0.916768	0.866851	0.355038	0.537585	0.595173	0.639993	0.791431	0.825043	0.842806	0.850051	0.802942	0.993417	0.957563	0.931131	0.90049	0.857814	0.801119	0.732966	0.617461	0.224843	0.15094	0.403312	0.487763	0.556709	0.770207	0.832692	0.877924	0.924413	0.987768	0.272235	0.339094	0.367555	0.39374	0.544104	0.60488	0.657489	0.723122	0.854585	0.427358	0.500832	0.527059	0.547907	0.66586	0.689305	0.693179	0.666127
80	Model2	3	3_4	0.888827	0.767839	0.375117	0.465792	0.537738	0.621236	0.692267	0.764775	0.826214	0.856736	0.834962	0.9901	0.969428	0.940614	0.902534	0.848139	0.761576	0.638338	0.451829	0.163628	0.229498	0.346538	0.442342	0.554628	0.655358	0.765532	0.8707	0.952613	0.993925	0.233289	0.259961	0.285405	0.324252	0.368175	0.434743	0.538956	0.693039	0.864452	0.377606	0.409981	0.437931	0.477098	0.513458	0.553515	0.584452	0.547024
80	Model2	2	3_5	0.926739	0.87697	0.345498	0.445404	0.514939	0.580056	0.659265	0.774095	0.832302	0.860461	0.816568	0.997024	0.98645	0.969386	0.943914	0.90674	0.855804	0.774304	0.621352	0.231676	0.152209	0.284891	0.380117	0.47211	0.585846	0.749854	0.849508	0.931397	0.990089	0.258652	0.290398	0.316912	0.346608	0.393765	0.503717	0.604183	0.728779	0.873972	0.410746	0.448703	0.477666	0.507032	0.549083	0.634169	0.678746	0.670792
10	Model3	2	2_5	0.856313	0.637457	0.120108	0.184378	0.311066	0.448797	0.577552	0.701379	0.819268	0.874985	0.892426	0.999886	0.995425	0.978312	0.942878	0.885344	0.798419	0.675805	0.50069	0.236133	0.00336358	0.076754	0.222524	0.383234	0.536709	0.688503	0.838305	0.924653	0.979514	0.117489	0.125164	0.143084	0.168648	0.202287	0.253801	0.356752	0.46859	0.604678	0.21027	0.222368	0.249655	0.28612	0.329328	0.385166	0.466986	0.484108
10	Model3	2	2_3_4_5	0.863051	0.651274	0.14486	0.228841	0.34017	0.460207	0.574532	0.679734	0.781657	0.875477	0.895385	0.998997	0.991814	0.975026	0.944803	0.896591	0.822189	0.706651	0.530638	0.2653	0.0315179	0.127596	0.255926	0.395902	0.531796	0.66083	0.79161	0.921236	0.978995	0.120398	0.131085	0.148128	0.171868	0.202622	0.243384	0.310334	0.472014	0.626314	0.214898	0.231565	0.257184	0.290832	0.330543	0.375587	0.431271	0.499612
10	Model3	1	2_5	0.864865	0.642394	0.184254	0.299824	0.425466	0.547159	0.719179	0.798316	0.8539	0.885944	0.891878	0.996791	0.9811	0.948539	0.897449	0.82544	0.729248	0.59983	0.425405	0.187	0.074076	0.207444	0.354538	0.499661	0.70477	0.807682	0.888351	0.948392	0.987458	0.127381	0.14373	0.166158	0.195636	0.274901	0.339572	0.421461	0.527799	0.669058	0.225895	0.250728	0.28278	0.321244	0.412443	0.463375	0.495069	0.471103
10	Model3	1	2_3_4_5	0.863115	0.64067	0.184398	0.310349	0.42473	0.539247	0.644389	0.766677	0.852312	0.887485	0.892633	0.996362	0.978171	0.947471	0.900057	0.832745	0.741014	0.61458	0.4385	0.185755	0.0742978	0.219794	0.353847	0.490322	0.618848	0.770157	0.884548	0.948366	0.988484	0.12736	0.145302	0.165854	0.193195	0.228547	0.304187	0.419219	0.535221	0.686251	0.225851	0.253019	0.282292	0.318108	0.35866	0.431318	0.498441	0.482057
30	Model3	1	3	0.782501	0.569031	0.235817	0.329273	0.40943	0.502249	0.596671	0.73389	0.785351	0.825197	0.825738	0.990642	0.958839	0.911722	0.828313	0.708273	0.530252	0.357135	0.0957053	0	0.0765199	0.19641	0.303427	0.433438	0.573118	0.776866	0.875722	0.979148	1	0.184596	0.201157	0.216437	0.235788	0.259342	0.334002	0.377511	0.492028	0	0.311203	0.332547	0.349827	0.367082	0.379665	0.409845	0.36704	0.160242
30	Model3	1	3_5	0.908052	0.793676	0.320256	0.463078	0.630851	0.699001	0.755691	0.805385	0.846573	0.875251	0.855447	0.992238	0.972211	0.944123	0.911833	0.87248	0.818865	0.740897	0.600408	0.228634	0.178442	0.355632	0.564739	0.654085	0.731044	0.80254	0.868875	0.933253	0.987728	0.203112	0.241511	0.314017	0.357449	0.406386	0.466716	0.543884	0.654976	0.797234	0.337199	0.386908	0.471284	0.513572	0.554497	0.59456	0.627285	0.626506
30	Model3	3	2_3_4	0.848047	0.602788	0.255363	0.368112	0.4673	0.566564	0.669825	0.753945	0.822324	0.868745	0.866254	0.990951	0.967847	0.931559	0.875238	0.795031	0.703614	0.555315	0.330143	0.0291946	0.13935	0.273525	0.394079	0.517881	0.650079	0.761883	0.864435	0.95369	0.998271	0.153684	0.173632	0.195154	0.222585	0.263803	0.317886	0.392483	0.529268	0.726958	0.2661	0.294441	0.322705	0.354911	0.396155	0.437923	0.459911	0.406637
30	Model3	2	2_5	0.900204	0.773621	0.226164	0.345611	0.45598	0.53367	0.602806	0.673753	0.768256	0.856626	0.852634	0.998483	0.988956	0.969651	0.945027	0.911698	0.861863	0.784676	0.6369	0.189369	0.0698573	0.215408	0.35202	0.450417	0.540291	0.635682	0.764933	0.901095	0.986869	0.17848	0.203251	0.232454	0.258165	0.286414	0.323768	0.403193	0.565833	0.744811	0.302829	0.337201	0.375008	0.405543	0.435891	0.470709	0.532678	0.599267
30	Model3	1	3_4	0.782487	0.567423	0.174262	0.288176	0.381176	0.487438	0.601035	0.752096	0.796007	0.826736	0.825738	1	0.975188	0.92942	0.843985	0.706677	0.515319	0.301207	0.0364013	0	0	0.14319	0.265475	0.412193	0.578741	0.802065	0.900429	0.993527	1	0.174262	0.193676	0.210755	0.232548	0.26146	0.354602	0.389649	0.54271	0	0.296803	0.323169	0.343597	0.364628	0.381698	0.420114	0.339767	0.0682265
30	Model3	1	4	0.557485	0.323542	0.174262	0.174262	0.174262	0.174262	0.693876	0.810094	0.825738	0.825738	0.825738	1	1	1	1	0.313118	0.0509262	0	0	0	0	0	0	0	0.77423	0.970308	1	1	1	0.174262	0.174262	0.174262	0.174262	0.226418	0.265763	0	0	0	0.296803	0.296803	0.296803	0.296803	0.262802	0.0854737	0	0
30	Model3	3	2_3_5	0.909203	0.737182	0.343931	0.486784	0.595372	0.689989	0.755181	0.80992	0.85662	0.888234	0.885974	0.991485	0.969482	0.940228	0.905341	0.862292	0.802565	0.712297	0.565241	0.253862	0.241803	0.410656	0.540983	0.656025	0.738288	0.81108	0.879382	0.939175	0.985668	0.170978	0.205998	0.244173	0.293338	0.341949	0.401197	0.482231	0.594424	0.736393	0.291661	0.339796	0.38767	0.443106	0.489703	0.534967	0.575109	0.579465
30	Model3	3	5	0.888507	0.710175	0.240741	0.38271	0.543891	0.657881	0.758696	0.812906	0.85767	0.883672	0.880502	0.99534	0.972373	0.926035	0.877435	0.826266	0.761013	0.659643	0.521237	0.191918	0.12173	0.289712	0.483621	0.623254	0.748039	0.82109	0.888902	0.940833	0.989102	0.151634	0.17757	0.220475	0.268639	0.340891	0.401504	0.483585	0.581485	0.73526	0.263175	0.3003	0.356155	0.411341	0.482654	0.525669	0.558057	0.549715
30	Model3	2	2_3_4_5	0.903126	0.775362	0.278234	0.379079	0.466376	0.540734	0.607664	0.675429	0.741558	0.852666	0.860814	0.996203	0.986134	0.969042	0.944926	0.911105	0.860007	0.780573	0.647712	0.289631	0.132927	0.25622	0.364643	0.458931	0.546252	0.638073	0.733662	0.894146	0.976413	0.188658	0.211562	0.23587	0.261146	0.288955	0.324738	0.372311	0.553249	0.713071	0.317239	0.348383	0.379393	0.409202	0.438759	0.471455	0.504154	0.596766
30	Model3	3	3_5	0.903476	0.728892	0.292636	0.444542	0.563774	0.672736	0.747226	0.806487	0.855937	0.88648	0.882109	0.992981	0.973207	0.940959	0.899688	0.850666	0.78408	0.685349	0.531705	0.202483	0.182181	0.361164	0.504286	0.636943	0.730912	0.810021	0.882841	0.942433	0.989296	0.160718	0.19372	0.230397	0.281005	0.332702	0.394276	0.479867	0.592948	0.74896	0.276657	0.323121	0.37016	0.428252	0.478327	0.524704	0.56449	0.560659
30	Model3	3	4	0.499982	0.201163	0.136229	0.136229	0.136229	0.136229	0.861631	0.863771	0.863771	0.863771	0.863771	1	1	1	1	0.00280872	0	0	0	0	0	0	0	0	0.99708	1	1	1	1	0.136229	0.136229	0.136229	0.136229	0.131718	0	0	0	0	0.239792	0.239792	0.239792	0.239792	0.00550016	0	0	0
30	Model3	2	3_4_5	0.901172	0.774851	0.277145	0.373499	0.4625	0.545061	0.616905	0.682956	0.78743	0.854558	0.858881	0.99535	0.984308	0.965144	0.93652	0.898847	0.846453	0.767768	0.631579	0.267933	0.131791	0.24988	0.360772	0.465836	0.559844	0.649867	0.791409	0.899686	0.978481	0.188327	0.209842	0.234053	0.261901	0.292433	0.328531	0.42691	0.560289	0.715899	0.316727	0.345936	0.376744	0.409331	0.441294	0.473344	0.548713	0.593802
30	Model3	1	5	0.896332	0.780216	0.263774	0.392465	0.513548	0.600984	0.763325	0.803135	0.842444	0.87053	0.843731	0.994958	0.973784	0.937303	0.898538	0.858769	0.812964	0.738285	0.599884	0.134943	0.109466	0.269784	0.42412	0.538188	0.743183	0.80106	0.864425	0.927647	0.993313	0.190797	0.219623	0.255668	0.291088	0.413727	0.46306	0.534717	0.636328	0.809837	0.320193	0.358411	0.40175	0.439724	0.558423	0.590038	0.620224	0.617569
30	Model3	3	3_4	0.814993	0.533025	0.223883	0.331026	0.427137	0.515386	0.608136	0.730978	0.808929	0.857521	0.863771	0.991953	0.96824	0.927296	0.868934	0.777297	0.644603	0.468554	0.24882	0	0.102747	0.230528	0.348255	0.459627	0.581457	0.7446	0.862611	0.953521	1	0.148473	0.165592	0.18327	0.202303	0.226545	0.284721	0.349752	0.457793	0	0.258286	0.282816	0.306052	0.328196	0.350837	0.394979	0.400529	0.322406
30	Model3	1	2_3_4	0.829296	0.647725	0.276967	0.380113	0.473306	0.556298	0.673434	0.755799	0.815875	0.837826	0.825738	0.987366	0.956093	0.908594	0.840998	0.711058	0.620916	0.46767	0.217316	0	0.127045	0.25856	0.381443	0.496215	0.665495	0.784264	0.88936	0.968778	1	0.1927	0.21392	0.236637	0.260518	0.30968	0.377876	0.471471	0.594959	0	0.322466	0.349616	0.375482	0.397807	0.431453	0.469826	0.469563	0.318351
30	Model3	2	3_5	0.901394	0.774602	0.277471	0.378192	0.466666	0.547813	0.617113	0.682373	0.786795	0.854006	0.858479	0.995348	0.983653	0.964041	0.935666	0.898846	0.846944	0.770173	0.637207	0.266979	0.132183	0.255655	0.366004	0.469317	0.560094	0.649066	0.790158	0.897883	0.97819	0.188396	0.211016	0.235324	0.26299	0.29255	0.328154	0.426213	0.558086	0.712435	0.316824	0.347488	0.378303	0.410578	0.441428	0.47303	0.548749	0.595028
30	Model3	1	3_4_5	0.908384	0.793805	0.32267	0.457782	0.578692	0.696692	0.7528	0.80453	0.847411	0.875257	0.857406	0.991748	0.971713	0.944259	0.912506	0.873691	0.820233	0.740967	0.600046	0.246955	0.181469	0.349323	0.501543	0.651147	0.727287	0.801216	0.869874	0.933337	0.986235	0.20363	0.239637	0.285604	0.355678	0.403378	0.465468	0.545806	0.655123	0.791062	0.337884	0.384461	0.438559	0.511847	0.551932	0.593905	0.628587	0.626376
30	Model3	3	2_4_5	0.9052	0.73401	0.296789	0.469044	0.598008	0.691493	0.759393	0.815067	0.86133	0.889147	0.884822	0.993322	0.969375	0.937309	0.902444	0.856226	0.792792	0.696571	0.544968	0.232449	0.186936	0.390135	0.544495	0.658223	0.744121	0.81858	0.887315	0.943429	0.987711	0.161552	0.200439	0.245018	0.294003	0.34544	0.408004	0.493652	0.603067	0.748942	0.277906	0.33219	0.388484	0.443515	0.492275	0.538747	0.577814	0.572547
30	Model3	3	2_3	0.84791	0.602653	0.248609	0.36487	0.467775	0.562619	0.666817	0.76283	0.82507	0.868416	0.863771	0.991784	0.968567	0.931399	0.8778	0.798741	0.687882	0.545518	0.334007	0	0.1314	0.269659	0.394654	0.51291	0.646011	0.774651	0.86916	0.9527	1	0.152601	0.172978	0.195277	0.221318	0.262464	0.324974	0.396706	0.526897	0	0.264504	0.293534	0.322862	0.353507	0.3951	0.441413	0.45936	0.408843
30	Model3	1	2_4_5	0.909312	0.797885	0.322933	0.495772	0.656786	0.726169	0.775232	0.815985	0.852791	0.878346	0.854357	0.992212	0.96745	0.937177	0.906706	0.8702	0.820856	0.74472	0.602539	0.211396	0.18169	0.39623	0.597613	0.688069	0.75519	0.814957	0.875598	0.936551	0.990047	0.20375	0.252703	0.329542	0.380204	0.428622	0.483517	0.558178	0.667124	0.81759	0.338076	0.400733	0.48762	0.535754	0.574346	0.608565	0.638095	0.633189
30	Model3	2	2_3_5	0.902134	0.774197	0.268696	0.364274	0.454597	0.53572	0.604827	0.6724	0.735171	0.835349	0.854611	0.996756	0.988014	0.971587	0.94568	0.910256	0.858365	0.775933	0.624592	0.21021	0.121347	0.238038	0.349966	0.45275	0.543013	0.634763	0.726921	0.878003	0.985029	0.18672	0.207875	0.232246	0.259113	0.287305	0.322327	0.365105	0.50888	0.739698	0.314522	0.343483	0.374881	0.406772	0.436756	0.468664	0.49656	0.56083
30	Model3	2	2_4_5	0.897621	0.768719	0.180196	0.331382	0.44698	0.528679	0.601688	0.672654	0.733028	0.855032	0.83168	0.999781	0.990327	0.971305	0.945762	0.910397	0.855485	0.771506	0.599202	0	0.0143241	0.198021	0.340865	0.444268	0.53921	0.635651	0.72524	0.906808	1	0.170318	0.199947	0.229724	0.256188	0.285643	0.322125	0.362361	0.565462	0	0.291054	0.332718	0.371568	0.403167	0.434849	0.468021	0.493115	0.581843
30	Model3	1	2	0.8105	0.620102	0.230625	0.338474	0.450558	0.554931	0.707674	0.781762	0.822347	0.83626	0.825738	0.993564	0.965415	0.910417	0.82717	0.62686	0.562804	0.438471	0.190231	0	0.069616	0.206165	0.35351	0.497479	0.724729	0.827971	0.903359	0.972597	1	0.18392	0.204235	0.229105	0.257817	0.324592	0.408433	0.489145	0.594325	0	0.310384	0.337146	0.366085	0.393108	0.427712	0.47335	0.462424	0.288212
30	Model3	3	2_3_4_5	0.909413	0.738329	0.341696	0.482593	0.600611	0.691512	0.756874	0.811382	0.857572	0.888541	0.887387	0.991669	0.970652	0.940454	0.904199	0.860135	0.800123	0.710054	0.569076	0.258501	0.239723	0.406023	0.547294	0.658144	0.740673	0.813149	0.880716	0.938662	0.986052	0.169875	0.204062	0.245807	0.293268	0.342264	0.401848	0.482909	0.592759	0.74409	0.290061	0.337228	0.389746	0.44289	0.489676	0.535001	0.574857	0.580676
30	Model3	3	2_4	0.824147	0.566079	0.173868	0.306581	0.428101	0.590847	0.693389	0.772915	0.834754	0.867787	0.863771	0.996646	0.972751	0.930232	0.831785	0.750314	0.650082	0.493344	0.298517	0	0.0441038	0.201516	0.348908	0.552847	0.684411	0.792288	0.8886	0.957569	1	0.141216	0.161169	0.183894	0.22683	0.272709	0.330478	0.411227	0.525971	0	0.247381	0.276522	0.307082	0.356455	0.400025	0.438194	0.448558	0.38087
30	Model3	3	3_4_5	0.903797	0.729419	0.313569	0.448448	0.566743	0.674922	0.745582	0.805087	0.854547	0.88602	0.883316	0.992379	0.972625	0.940294	0.899898	0.851972	0.786795	0.690217	0.537896	0.219364	0.206511	0.365778	0.507829	0.63944	0.728803	0.807972	0.880464	0.940924	0.988031	0.16475	0.19476	0.231546	0.282449	0.331311	0.392541	0.476621	0.589495	0.742971	0.282586	0.324535	0.371588	0.42995	0.477092	0.523768	0.563869	0.562515
30	Model3	3	2	0.824197	0.566288	0.136229	0.316331	0.421626	0.594143	0.691497	0.761122	0.834771	0.870016	0.863771	1	0.970086	0.931892	0.829168	0.751808	0.672694	0.493302	0.26282	0	0	0.213225	0.34115	0.557076	0.681985	0.775068	0.888626	0.96578	1	0.136229	0.162802	0.182388	0.227946	0.271587	0.320499	0.411263	0.547776	0	0.239792	0.278812	0.305069	0.357588	0.399027	0.434151	0.448562	0.355212
30	Model3	2	4	0.51025	0.286115	0.16832	0.16832	0.16832	0.16832	0.523422	0.83168	0.83168	0.83168	0.83168	1	1	1	1	0.467163	0	0	0	0	0	0	0	0	0.534808	1	1	1	1	0.16832	0.16832	0.16832	0.16832	0.168913	0	0	0	0	0.28814	0.28814	0.28814	0.28814	0.248114	0	0	0
30	Model3	1	2_3_5	0.911774	0.800432	0.345846	0.49314	0.63312	0.717387	0.769485	0.81446	0.853074	0.87863	0.860017	0.990962	0.969208	0.941856	0.909969	0.87187	0.821019	0.742756	0.598445	0.257335	0.209702	0.392672	0.567964	0.676744	0.747877	0.813075	0.876355	0.93776	0.987206	0.20925	0.251937	0.315103	0.372677	0.421897	0.481041	0.559033	0.669874	0.809338	0.345538	0.399919	0.472221	0.528789	0.568633	0.606644	0.63793	0.632148
30	Model3	2	3	0.808228	0.610828	0.249609	0.314102	0.384682	0.450183	0.583998	0.679762	0.762732	0.819912	0.83168	0.990964	0.973874	0.942531	0.898736	0.787849	0.668316	0.475452	0.213204	0	0.099569	0.180573	0.271782	0.359403	0.542741	0.682079	0.820874	0.942701	1	0.182161	0.193894	0.207574	0.221147	0.258549	0.298464	0.349462	0.429567	0	0.30775	0.323401	0.340221	0.354953	0.389331	0.412645	0.402836	0.28497
30	Model3	1	4_5	0.89656	0.780345	0.266757	0.39734	0.516644	0.662884	0.764759	0.804446	0.842468	0.870764	0.852204	0.994626	0.97276	0.936399	0.897609	0.858183	0.812115	0.739168	0.60429	0.207238	0.113149	0.275904	0.42806	0.613347	0.745043	0.802828	0.864268	0.927	0.988316	0.191386	0.220887	0.256792	0.328824	0.415326	0.465019	0.534726	0.635963	0.789176	0.321005	0.360023	0.403054	0.481324	0.559754	0.591401	0.620542	0.619722
30	Model3	3	4_5	0.888592	0.708942	0.244474	0.391256	0.546582	0.656898	0.756333	0.811593	0.857857	0.883619	0.880023	0.995056	0.970568	0.925591	0.878826	0.829691	0.762695	0.658571	0.520982	0.191298	0.126096	0.299891	0.486806	0.621896	0.744764	0.819305	0.889287	0.940812	0.988645	0.15224	0.179414	0.221458	0.268244	0.338921	0.399651	0.484045	0.581279	0.726545	0.264077	0.302845	0.357403	0.411029	0.481254	0.524477	0.557979	0.549481
30	Model3	2	2_3_4	0.83446	0.651686	0.255761	0.324689	0.394749	0.471295	0.580967	0.662868	0.751004	0.826797	0.832456	0.993247	0.97985	0.957238	0.920061	0.846851	0.74793	0.579075	0.291121	0.00710319	0.106505	0.192094	0.28091	0.380471	0.527155	0.645653	0.7858	0.93521	0.999496	0.18366	0.197083	0.212233	0.231102	0.266037	0.299318	0.353645	0.476268	0.740358	0.309999	0.328161	0.347435	0.369414	0.404881	0.427537	0.439117	0.36136
30	Model3	2	2_3	0.83398	0.651337	0.256761	0.324377	0.391753	0.469135	0.579791	0.661378	0.746985	0.826345	0.832584	0.993104	0.979706	0.957664	0.919759	0.846589	0.751845	0.585244	0.293323	0.00826287	0.107735	0.191748	0.27722	0.377935	0.525795	0.643068	0.779719	0.934221	0.999415	0.183846	0.196992	0.211453	0.230319	0.265416	0.298889	0.349678	0.474372	0.740902	0.310256	0.328027	0.346417	0.368388	0.404132	0.427735	0.437784	0.362499
30	Model3	1	2_3	0.829034	0.646591	0.279268	0.375499	0.474138	0.562174	0.654471	0.753125	0.814915	0.837526	0.825738	0.986922	0.958121	0.907809	0.83642	0.733575	0.630705	0.463579	0.217526	0	0.129926	0.252544	0.382617	0.504297	0.637776	0.77896	0.88906	0.96837	1	0.193145	0.212919	0.236824	0.262588	0.299423	0.375845	0.46861	0.59206	0	0.323065	0.348412	0.37565	0.399694	0.425265	0.47101	0.466081	0.318159
30	Model3	1	2_5	0.910092	0.799123	0.324956	0.47814	0.640503	0.718699	0.772051	0.818032	0.854791	0.879196	0.856783	0.991994	0.969361	0.939357	0.908092	0.870558	0.819286	0.741694	0.602092	0.230328	0.184186	0.374474	0.577433	0.67873	0.751263	0.817767	0.878659	0.937675	0.988988	0.20421	0.246443	0.319327	0.373636	0.424829	0.486861	0.563312	0.670917	0.815303	0.338697	0.392979	0.476628	0.529435	0.571008	0.610771	0.640312	0.634644
30	Model3	2	5	0.889071	0.762278	0.227751	0.324019	0.450739	0.557994	0.634343	0.767798	0.817405	0.856292	0.855216	0.996855	0.984792	0.95549	0.917399	0.877343	0.826873	0.753951	0.619856	0.239072	0.0720957	0.190288	0.348585	0.485256	0.585164	0.755842	0.830247	0.904144	0.979915	0.178594	0.197526	0.228905	0.265084	0.299734	0.406671	0.473376	0.566861	0.706662	0.302918	0.329052	0.369331	0.411318	0.446817	0.545201	0.581593	0.592175
30	Model3	3	2_5	0.905293	0.733765	0.300274	0.471078	0.597369	0.689547	0.758091	0.814682	0.861682	0.888853	0.884692	0.993151	0.969012	0.93739	0.902996	0.857154	0.793352	0.695331	0.547192	0.232096	0.190998	0.392546	0.543743	0.655883	0.742468	0.818046	0.887918	0.942737	0.987616	0.162208	0.201014	0.244729	0.292715	0.34423	0.407464	0.494547	0.601131	0.747208	0.27887	0.332958	0.388127	0.442114	0.491197	0.538405	0.577999	0.572895
30	Model3	1	2_3_4_5	0.912057	0.801029	0.342821	0.482898	0.589502	0.704106	0.767092	0.81231	0.853157	0.879142	0.859932	0.990855	0.968954	0.941646	0.90986	0.872208	0.821521	0.742673	0.596413	0.256568	0.206061	0.380322	0.515186	0.660684	0.744908	0.810366	0.876473	0.938809	0.987265	0.208473	0.248114	0.290728	0.361385	0.419139	0.477601	0.55924	0.672875	0.809588	0.34447	0.395065	0.444285	0.517304	0.566193	0.604038	0.638034	0.632341
30	Model3	2	2_4	0.799948	0.59943	0.16832	0.16832	0.263881	0.442352	0.590239	0.691393	0.821128	0.83168	0.83168	1	1	0.983661	0.926277	0.809878	0.629924	0.303356	0	0	0	0	0.118207	0.344413	0.545787	0.703834	0.925918	1	1	0.16832	0.16832	0.184184	0.222365	0.265171	0.300924	0.453176	0	0	0.28814	0.28814	0.310271	0.358635	0.399528	0.407283	0.363431	0
30	Model3	2	3_4	0.808265	0.613218	0.16832	0.288628	0.367753	0.444485	0.581267	0.696741	0.777007	0.831699	0.83168	1	0.981944	0.95159	0.903597	0.791729	0.637092	0.428845	0.000349834	0	0	0.148311	0.249593	0.351567	0.538672	0.708814	0.847469	0.999952	1	0.16832	0.189192	0.20423	0.219985	0.257793	0.306905	0.362657	0.597647	0	0.28814	0.317258	0.336286	0.353828	0.388943	0.414253	0.392984	0.000699258
30	Model3	2	4_5	0.887727	0.760458	0.222346	0.318261	0.449003	0.556907	0.629516	0.732397	0.816308	0.856878	0.853747	0.99745	0.985775	0.955175	0.916203	0.877022	0.8274	0.753238	0.609947	0.217632	0.0654765	0.183166	0.346561	0.48419	0.579425	0.71317	0.829073	0.906853	0.982487	0.177641	0.196299	0.2283	0.264428	0.296781	0.36861	0.471422	0.569942	0.715512	0.301573	0.327402	0.368519	0.410407	0.443488	0.510009	0.579905	0.589266
30	Model3	1	2_4	0.81008	0.620118	0.174262	0.174262	0.174262	0.294921	0.726298	0.828734	0.825738	0.825738	0.825738	1	1	1	0.977213	0.615385	0.0303495	0	0	0	0	0	0	0.150931	0.749705	0.997224	1	1	1	0.174262	0.174262	0.174262	0.195423	0.341615	0.697618	0	0	0	0.296803	0.296803	0.296803	0.32571	0.439341	0.0581684	0	0
30	Model3	2	2	0.799754	0.600073	0.16832	0.210371	0.347406	0.467585	0.552716	0.677058	0.741025	0.837753	0.83168	1	0.993506	0.963807	0.910733	0.835229	0.659906	0.51982	0.203107	0	0	0.0518754	0.222655	0.377898	0.49554	0.68053	0.785794	0.966196	1	0.16832	0.174967	0.200596	0.228564	0.250985	0.294808	0.329369	0.548739	0	0.28814	0.297535	0.332077	0.36542	0.385983	0.407547	0.403238	0.296478
30	Model3	3	3	0.814992	0.533971	0.223873	0.329905	0.42812	0.509293	0.611525	0.731264	0.809248	0.858401	0.863771	0.991955	0.968618	0.926762	0.87395	0.775749	0.64454	0.46803	0.240409	0	0.102736	0.22917	0.349477	0.451781	0.585624	0.744941	0.863063	0.955867	1	0.148471	0.165403	0.183464	0.200909	0.227952	0.284973	0.350246	0.462112	0	0.258284	0.282556	0.306294	0.326712	0.352363	0.39521	0.400661	0.316277
80	Model3	1	3	0.851654	0.765331	0.24226	0.402739	0.492748	0.617962	0.691264	0.798339	0.813864	0.75774	0.75774	1	0.977613	0.935665	0.857434	0.763906	0.576596	0.390398	0	0	0	0.218945	0.351141	0.541399	0.66804	0.869233	0.949252	1	1	0.24226	0.285801	0.315552	0.374123	0.423871	0.585015	0.710942	0	0	0.390031	0.442299	0.471942	0.520944	0.545216	0.580775	0.504023	0
80	Model3	1	3_5	0.927556	0.883527	0.41886	0.519961	0.603916	0.718527	0.791349	0.831183	0.854931	0.860271	0.808832	0.991428	0.971967	0.943203	0.906224	0.861028	0.801642	0.717222	0.570936	0.235023	0.235803	0.375449	0.495441	0.658518	0.769072	0.840628	0.898958	0.952775	0.992286	0.293176	0.332246	0.374085	0.459008	0.543809	0.616588	0.694134	0.79446	0.906896	0.452533	0.495214	0.535703	0.609367	0.666604	0.697042	0.705489	0.664402
80	Model3	3	2_3_4	0.894559	0.774032	0.391179	0.485365	0.558845	0.648112	0.712661	0.768019	0.819682	0.852153	0.841277	0.98988	0.969811	0.941728	0.901302	0.845967	0.765636	0.647591	0.48193	0.217966	0.249415	0.370654	0.468183	0.58816	0.681096	0.768583	0.86043	0.939817	0.988869	0.237966	0.267337	0.295425	0.341326	0.385799	0.439274	0.523508	0.654713	0.82259	0.383692	0.419136	0.449759	0.495141	0.529927	0.558256	0.578976	0.555189
80	Model3	2	2_5	0.914235	0.857035	0.228795	0.228795	0.473391	0.595403	0.680603	0.799833	0.842676	0.771205	0.771205	1	1	0.978885	0.944576	0.893026	0.813538	0.599685	0	0	0	0	0.323426	0.491813	0.617583	0.795768	0.914764	1	1	0.228795	0.228795	0.300323	0.355433	0.40926	0.541654	0.676088	0	0	0.372389	0.372389	0.459631	0.516509	0.56129	0.650323	0.635599	0
80	Model3	1	3_4	0.875366	0.795919	0.379893	0.466886	0.546684	0.657293	0.720965	0.78436	0.818576	0.816415	0.75774	0.990584	0.966201	0.93337	0.88159	0.814956	0.70873	0.546726	0.357579	0	0.184647	0.307248	0.423056	0.585582	0.690915	0.808539	0.90549	0.963111	1	0.279759	0.308396	0.340903	0.404806	0.4574	0.542016	0.64906	0.756044	0	0.436299	0.467555	0.499404	0.554842	0.585938	0.614262	0.593514	0.485524
80	Model3	1	4	0.839554	0.747405	0.24226	0.294737	0.357004	0.47789	0.666479	0.743402	0.778942	0.801221	0.75774	1	0.996196	0.983825	0.939573	0.815255	0.672922	0.557061	0.338237	0	0	0.0704711	0.156601	0.330284	0.618913	0.765935	0.84988	0.949244	1	0.24226	0.255201	0.271639	0.309649	0.406161	0.478937	0.542624	0.680566	0	0.390031	0.406314	0.425731	0.465791	0.542198	0.559595	0.549747	0.451888
80	Model3	3	2_3_5	0.919651	0.824476	0.416014	0.564819	0.642773	0.708508	0.765077	0.812543	0.847557	0.867512	0.858653	0.99104	0.971757	0.944804	0.909048	0.862603	0.803029	0.717844	0.587996	0.33331	0.279856	0.468462	0.571256	0.661023	0.741984	0.814795	0.878271	0.933698	0.983047	0.245772	0.302111	0.342882	0.388379	0.441849	0.506583	0.582699	0.677412	0.823183	0.393867	0.460925	0.50316	0.544239	0.584369	0.621254	0.64325	0.629545
80	Model3	3	5	0.900902	0.800008	0.278766	0.486558	0.592569	0.708939	0.774323	0.813634	0.841819	0.859513	0.847606	0.995142	0.962458	0.931545	0.881596	0.825509	0.767563	0.683024	0.544987	0.260752	0.109137	0.373871	0.512304	0.668056	0.762202	0.824542	0.879419	0.933989	0.986565	0.209176	0.26685	0.31143	0.386078	0.451152	0.508806	0.572882	0.66158	0.821295	0.345689	0.417849	0.466801	0.536991	0.583444	0.611956	0.623123	0.59765
80	Model3	2	2_3_4_5	0.925278	0.87029	0.339841	0.451127	0.551397	0.638239	0.712809	0.776527	0.826147	0.851798	0.808708	0.997054	0.986568	0.967612	0.939603	0.901101	0.847532	0.76166	0.59851	0.196042	0.144865	0.292276	0.427918	0.548833	0.656948	0.755461	0.845278	0.926941	0.990469	0.257007	0.292567	0.334126	0.381896	0.437973	0.506956	0.59357	0.708488	0.859197	0.408672	0.4513	0.496728	0.543066	0.589449	0.634426	0.667191	0.648872
80	Model3	3	3_5	0.915786	0.819618	0.420418	0.554671	0.645825	0.705321	0.761654	0.811242	0.845331	0.865472	0.858956	0.987943	0.965769	0.938677	0.906613	0.863032	0.800875	0.713998	0.589872	0.345832	0.286035	0.457328	0.576481	0.657658	0.73765	0.813697	0.876429	0.930731	0.980457	0.24679	0.296468	0.34418	0.3854	0.437867	0.504433	0.577733	0.668478	0.807325	0.394927	0.45367	0.503679	0.540875	0.580972	0.618993	0.638678	0.62672
80	Model3	3	4	0.845078	0.70817	0.191453	0.340994	0.44734	0.54986	0.703028	0.786948	0.828659	0.843688	0.808547	1	0.975334	0.934907	0.869032	0.724563	0.606968	0.486008	0.349684	0	0	0.190791	0.331891	0.474284	0.697929	0.829565	0.909794	0.960661	1	0.191453	0.222031	0.248879	0.281309	0.362232	0.457485	0.560586	0.677919	0	0.321378	0.361718	0.39311	0.425033	0.482998	0.521731	0.52064	0.461379
80	Model3	2	3_4_5	0.926464	0.872947	0.33491	0.461132	0.564189	0.643688	0.715647	0.780502	0.830135	0.852891	0.810224	0.997402	0.987229	0.968655	0.941121	0.903701	0.849823	0.76305	0.599874	0.203414	0.138368	0.305054	0.444196	0.555448	0.659857	0.759937	0.850037	0.927953	0.990247	0.25563	0.296491	0.340821	0.385771	0.44078	0.512246	0.601521	0.711828	0.860873	0.406959	0.456026	0.504229	0.547229	0.592546	0.639202	0.672725	0.651074
80	Model3	1	5	0.914371	0.863611	0.361915	0.51144	0.589937	0.646142	0.685268	0.818158	0.8384	0.846792	0.823832	0.992091	0.961599	0.930203	0.892166	0.853326	0.805567	0.739164	0.621653	0.345114	0.16044	0.367518	0.481149	0.567485	0.631538	0.822184	0.870127	0.918772	0.976885	0.274204	0.327088	0.364347	0.397404	0.425429	0.591571	0.645344	0.709878	0.826792	0.429656	0.488136	0.523606	0.549873	0.567786	0.682181	0.689075	0.662843
80	Model3	3	3_4	0.887714	0.764173	0.381459	0.472515	0.544791	0.637019	0.704575	0.768462	0.817283	0.849346	0.838212	0.988611	0.967866	0.938399	0.895852	0.84471	0.756144	0.641048	0.464257	0.191895	0.237694	0.355222	0.45159	0.57573	0.671392	0.771379	0.859013	0.94053	0.991252	0.234937	0.262231	0.288344	0.333324	0.378371	0.439196	0.518453	0.648937	0.83855	0.379652	0.412657	0.441138	0.485868	0.522638	0.55565	0.573269	0.541278
80	Model3	1	2_3_4	0.887824	0.814852	0.425162	0.504817	0.612867	0.684556	0.74509	0.794389	0.823407	0.823592	0.779718	0.984987	0.961228	0.929868	0.882436	0.813864	0.716815	0.577442	0.383942	0.101251	0.246178	0.358897	0.511518	0.621291	0.723102	0.81919	0.902045	0.964154	0.996633	0.29466	0.32403	0.378342	0.426924	0.484458	0.558984	0.653343	0.773979	0.905782	0.453619	0.484676	0.537847	0.575446	0.607373	0.628137	0.613052	0.51327
80	Model3	2	3_5	0.92391	0.869208	0.265496	0.396145	0.524737	0.625794	0.709245	0.771433	0.832632	0.846519	0.771205	0.999545	0.992326	0.975395	0.947878	0.907924	0.845792	0.740233	0.523799	0	0.0477249	0.219275	0.391039	0.530241	0.650302	0.749372	0.860044	0.942261	1	0.237455	0.273825	0.322121	0.374461	0.435108	0.500294	0.61076	0.729098	0	0.383746	0.429212	0.484303	0.536842	0.588289	0.628703	0.669292	0.609628
80	Model3	1	3_4_5	0.929381	0.885048	0.43845	0.535997	0.640807	0.730492	0.791867	0.829773	0.854216	0.861935	0.821221	0.990244	0.971641	0.946595	0.913051	0.868313	0.814987	0.735661	0.588066	0.297384	0.262034	0.396716	0.543042	0.672125	0.767427	0.8345	0.89212	0.949494	0.988698	0.300214	0.339902	0.398421	0.47099	0.544139	0.611559	0.685554	0.788251	0.893761	0.460744	0.503624	0.560801	0.621424	0.669025	0.698768	0.709724	0.6736
80	Model3	3	2_4_5	0.920057	0.828381	0.430015	0.559988	0.64395	0.710419	0.766948	0.812676	0.847813	0.86824	0.862551	0.988593	0.968766	0.942408	0.906863	0.861757	0.804099	0.722705	0.599715	0.3622	0.297751	0.463195	0.57328	0.663904	0.744498	0.814707	0.877437	0.931823	0.981027	0.250002	0.29939	0.343376	0.389836	0.444023	0.506796	0.582678	0.675628	0.818854	0.399082	0.457418	0.503351	0.545274	0.586071	0.621734	0.645181	0.635412
80	Model3	3	2_3	0.880671	0.741992	0.387133	0.47215	0.541463	0.632073	0.69339	0.755682	0.808042	0.844104	0.832884	0.988705	0.969301	0.941958	0.902731	0.841903	0.748495	0.62891	0.44118	0.165957	0.244688	0.354432	0.446631	0.567985	0.658225	0.757384	0.850459	0.939511	0.990803	0.236615	0.26228	0.287274	0.331008	0.368401	0.422136	0.498955	0.633297	0.810346	0.381847	0.412849	0.440275	0.484399	0.512529	0.539823	0.556445	0.520063
80	Model3	1	2_4_5	0.926513	0.877216	0.463116	0.574961	0.681677	0.735759	0.780541	0.816475	0.841938	0.851695	0.817981	0.9872	0.967322	0.942755	0.911788	0.872512	0.824196	0.75167	0.63543	0.300438	0.29556	0.449518	0.598207	0.679481	0.751137	0.814007	0.870798	0.920838	0.983446	0.309414	0.359717	0.428625	0.476301	0.528505	0.586222	0.650352	0.719598	0.852994	0.471155	0.524418	0.589317	0.625732	0.658275	0.685132	0.69735	0.6749
80	Model3	2	2_3_5	0.923261	0.869337	0.346309	0.447887	0.559602	0.654159	0.720294	0.773851	0.818491	0.846333	0.835133	0.996325	0.985764	0.965659	0.936729	0.898891	0.849366	0.778644	0.651391	0.370718	0.153467	0.288315	0.439137	0.570329	0.667309	0.751448	0.830312	0.904166	0.972912	0.258802	0.291244	0.338095	0.392753	0.444929	0.503427	0.57651	0.668491	0.802378	0.410876	0.449642	0.500837	0.553453	0.595232	0.632165	0.662502	0.65983
80	Model3	2	2_4_5	0.918656	0.863247	0.267471	0.435604	0.55498	0.642018	0.706194	0.77367	0.822759	0.847657	0.771205	0.999147	0.984311	0.960637	0.929365	0.888568	0.830371	0.735899	0.531623	0	0.0504034	0.272818	0.434633	0.55677	0.652089	0.756848	0.848528	0.941415	1	0.237893	0.286516	0.335144	0.3835	0.431075	0.503264	0.590386	0.729151	0	0.384289	0.443838	0.496924	0.542952	0.58052	0.626702	0.65516	0.614914
80	Model3	1	2	0.849659	0.762216	0.377513	0.486043	0.583145	0.646436	0.709839	0.761088	0.798106	0.799362	0.75774	0.983372	0.956474	0.921766	0.856407	0.739728	0.613018	0.447358	0.242882	0	0.183812	0.335641	0.474883	0.579306	0.700284	0.808428	0.910245	0.977276	1	0.278083	0.315204	0.359471	0.394248	0.441054	0.5057	0.614423	0.773616	0	0.433562	0.474152	0.517232	0.539935	0.552617	0.554212	0.517747	0.369696
80	Model3	3	2_3_4_5	0.92215	0.830037	0.422001	0.569028	0.647066	0.711268	0.767095	0.813156	0.848087	0.868927	0.861029	0.991152	0.971503	0.945221	0.910794	0.865908	0.807531	0.725351	0.596262	0.345442	0.287234	0.473727	0.576466	0.664022	0.743697	0.814488	0.877149	0.93349	0.983113	0.247707	0.304159	0.345742	0.390949	0.444436	0.507566	0.582997	0.679775	0.828879	0.396357	0.463276	0.506293	0.547073	0.587389	0.623338	0.64643	0.635286
80	Model3	3	2_4	0.883215	0.758666	0.342992	0.458659	0.526397	0.622823	0.695141	0.764439	0.818487	0.84982	0.833544	0.989889	0.967525	0.943027	0.894045	0.829285	0.733647	0.614046	0.442796	0.161646	0.189815	0.338167	0.427744	0.558601	0.663378	0.771731	0.866896	0.946197	0.992641	0.22439	0.257144	0.280681	0.324145	0.368422	0.432148	0.522072	0.660874	0.838736	0.365848	0.406302	0.432603	0.475788	0.510186	0.54391	0.564336	0.53029
80	Model3	3	3_4_5	0.920001	0.826523	0.396118	0.550595	0.643126	0.709896	0.768624	0.814597	0.84808	0.867549	0.852583	0.992097	0.971192	0.944819	0.909476	0.862271	0.801661	0.714681	0.584637	0.279056	0.254998	0.451004	0.571689	0.662638	0.746449	0.81766	0.879667	0.934538	0.988386	0.23973	0.29522	0.343113	0.389627	0.446063	0.510053	0.584428	0.678946	0.85051	0.386151	0.4528	0.503412	0.54554	0.587965	0.623444	0.643025	0.628272
80	Model3	3	2	0.850929	0.693716	0.302984	0.453445	0.499674	0.584512	0.664399	0.754685	0.803482	0.836861	0.808547	0.990665	0.95902	0.94017	0.89071	0.789039	0.664678	0.536818	0.346844	0	0.14015	0.333732	0.39537	0.512008	0.634886	0.775997	0.866624	0.952891	1	0.214337	0.254193	0.269108	0.301772	0.3385	0.412667	0.487976	0.635483	0	0.352425	0.401868	0.418444	0.45081	0.473757	0.509198	0.511233	0.448758
80	Model3	2	4	0.780909	0.67488	0.250404	0.340756	0.422538	0.522687	0.659075	0.72629	0.76305	0.77974	0.77636	0.993032	0.966471	0.921969	0.817016	0.629304	0.511574	0.387428	0.269008	0.0332041	0.0300877	0.155124	0.274371	0.435368	0.667908	0.78999	0.874486	0.931259	0.996833	0.232978	0.253379	0.273754	0.300347	0.35987	0.419508	0.47801	0.537249	0.756713	0.37741	0.401498	0.422159	0.439227	0.457892	0.460989	0.427978	0.358507
80	Model3	1	2_3_5	0.930119	0.886298	0.456633	0.546921	0.667131	0.746682	0.798036	0.83239	0.856051	0.862471	0.819118	0.988653	0.968558	0.940954	0.905827	0.862436	0.808503	0.732187	0.595254	0.286078	0.286539	0.412118	0.579586	0.695801	0.777447	0.840027	0.895652	0.947904	0.989538	0.307014	0.345009	0.417103	0.487711	0.553362	0.617713	0.691677	0.785089	0.897353	0.468532	0.508785	0.577995	0.634044	0.674163	0.700346	0.711356	0.677118
80	Model3	2	3	0.854598	0.764529	0.304705	0.377844	0.442938	0.557551	0.654292	0.720919	0.773845	0.800523	0.771205	0.9954	0.98211	0.963599	0.905514	0.828701	0.722902	0.576619	0.290909	0	0.0997959	0.198575	0.288473	0.45432	0.60255	0.720331	0.832356	0.95171	1	0.247013	0.266624	0.286618	0.329895	0.382172	0.434021	0.505052	0.64122	0	0.395805	0.419391	0.441819	0.483604	0.523104	0.542396	0.538468	0.400238
80	Model3	1	4_5	0.923241	0.871345	0.373649	0.506425	0.582436	0.634512	0.773942	0.810123	0.837767	0.848044	0.821019	0.994721	0.975911	0.950684	0.920428	0.881971	0.829523	0.751655	0.636143	0.323168	0.175084	0.356325	0.464702	0.543101	0.739403	0.80392	0.865297	0.915791	0.980188	0.278252	0.326479	0.362167	0.391752	0.519703	0.57493	0.640809	0.707193	0.839102	0.43486	0.489276	0.524517	0.549588	0.654022	0.679151	0.69182	0.669789
80	Model3	3	4_5	0.914076	0.820588	0.376543	0.53197	0.633422	0.710733	0.766977	0.810148	0.842938	0.862715	0.859149	0.98965	0.964304	0.935025	0.897042	0.851078	0.792456	0.711005	0.588438	0.343941	0.231367	0.429599	0.562006	0.666618	0.747063	0.814337	0.874178	0.92766	0.981143	0.233642	0.28587	0.335764	0.389175	0.443435	0.502652	0.572294	0.65825	0.811992	0.378036	0.441004	0.494099	0.542842	0.583073	0.61513	0.634153	0.621389
80	Model3	2	2_3_4	0.869815	0.787659	0.308039	0.395672	0.48671	0.576888	0.661866	0.736778	0.796397	0.809704	0.771205	0.996338	0.982585	0.95293	0.905303	0.828414	0.72505	0.540803	0.299847	0	0.10384	0.221552	0.348396	0.479457	0.612455	0.740258	0.872224	0.960964	1	0.248027	0.272446	0.302583	0.34035	0.388066	0.452994	0.556667	0.695013	0	0.39718	0.426606	0.459319	0.494713	0.528541	0.557608	0.54862	0.418948
80	Model3	2	2_3	0.854499	0.764097	0.314549	0.381066	0.447423	0.585176	0.654292	0.718808	0.772178	0.800263	0.771205	0.99419	0.981301	0.962171	0.895841	0.828701	0.726933	0.582688	0.355274	0	0.112918	0.202994	0.294711	0.493011	0.60255	0.716397	0.828394	0.932278	1	0.249527	0.267545	0.288117	0.343924	0.382172	0.431957	0.50183	0.608819	0	0.398928	0.420456	0.443447	0.497032	0.523104	0.541904	0.539244	0.448706
80	Model3	1	2_3	0.879585	0.804501	0.436024	0.508206	0.610258	0.678033	0.741828	0.797729	0.821526	0.819115	0.780805	0.981477	0.954189	0.917875	0.856072	0.779276	0.664825	0.531052	0.354554	0.106393	0.261635	0.36562	0.511909	0.621112	0.729856	0.84022	0.914394	0.967642	0.996424	0.298236	0.32473	0.375481	0.419405	0.479781	0.570869	0.664805	0.777934	0.904869	0.457465	0.484556	0.532947	0.56299	0.593907	0.614275	0.590449	0.487104
80	Model3	1	2_5	0.924846	0.875232	0.448111	0.550761	0.680542	0.741856	0.78499	0.818496	0.842432	0.850036	0.805832	0.988296	0.967377	0.93803	0.903192	0.8636	0.812565	0.738043	0.618249	0.229132	0.275406	0.417564	0.59822	0.690275	0.759857	0.820393	0.875807	0.924141	0.99021	0.303654	0.346839	0.427403	0.482487	0.534829	0.59124	0.655167	0.722658	0.882119	0.464569	0.510607	0.587238	0.628975	0.660568	0.684455	0.69414	0.666389
80	Model3	2	5	0.913877	0.855794	0.228795	0.228795	0.381093	0.583143	0.677374	0.813493	0.8428	0.771205	0.771205	1	1	0.99214	0.949124	0.894775	0.784153	0.504855	0	0	0	0	0.199813	0.474567	0.612878	0.822197	0.943059	1	1	0.228795	0.228795	0.268919	0.348914	0.406779	0.566798	0.724546	0	0	0.372389	0.372389	0.423145	0.510252	0.559294	0.65799	0.595072	0
80	Model3	3	2_5	0.915724	0.820136	0.428616	0.553057	0.634577	0.703081	0.761785	0.809186	0.845067	0.865027	0.860434	0.987768	0.967525	0.941608	0.904428	0.856274	0.797888	0.717744	0.587785	0.357306	0.296216	0.454917	0.561876	0.655404	0.739411	0.811861	0.875215	0.930674	0.979568	0.249437	0.295922	0.337264	0.383276	0.43759	0.501048	0.576624	0.667511	0.80548	0.398294	0.453223	0.496642	0.538394	0.57919	0.61555	0.639491	0.625116
80	Model3	1	2_3_4_5	0.930095	0.885956	0.439653	0.535058	0.659671	0.743994	0.800967	0.834607	0.857842	0.860042	0.807495	0.99102	0.972615	0.945737	0.908835	0.863139	0.807382	0.721484	0.564741	0.228025	0.263374	0.395165	0.568211	0.691292	0.781089	0.843311	0.901437	0.954454	0.992759	0.300761	0.339551	0.411855	0.484864	0.557638	0.622271	0.700627	0.798557	0.909652	0.461472	0.503369	0.57382	0.632362	0.677543	0.702843	0.710903	0.661598
80	Model3	2	2_4	0.780704	0.675372	0.251755	0.33729	0.425663	0.515491	0.65996	0.727294	0.762066	0.779091	0.776883	0.991616	0.967686	0.919721	0.824654	0.627937	0.509055	0.392211	0.276657	0.0371821	0.0322588	0.150269	0.27909	0.423771	0.66946	0.79204	0.871791	0.928148	0.996331	0.233123	0.252534	0.274567	0.298035	0.360449	0.420695	0.475772	0.533212	0.750382	0.377499	0.400541	0.422888	0.437834	0.457997	0.460676	0.429969	0.364298
80	Model3	2	3_4	0.870357	0.787377	0.324517	0.403613	0.483677	0.585848	0.665655	0.73763	0.791628	0.809419	0.790029	0.994627	0.980455	0.952413	0.898867	0.825911	0.720126	0.568307	0.347983	0.109233	0.125714	0.23248	0.344616	0.492984	0.618112	0.742823	0.857881	0.946314	0.992002	0.25234	0.274825	0.30125	0.344673	0.390843	0.453765	0.542614	0.657882	0.802042	0.402552	0.429312	0.457722	0.49828	0.530594	0.556727	0.555163	0.455193
80	Model3	2	4_5	0.918662	0.863636	0.34079	0.461117	0.548926	0.625006	0.703254	0.76737	0.82422	0.848057	0.822734	0.995314	0.979209	0.956083	0.927651	0.8909	0.840899	0.76003	0.613673	0.286994	0.146612	0.307414	0.428134	0.53522	0.647585	0.745556	0.843263	0.917592	0.981673	0.257064	0.2955	0.331548	0.371908	0.428565	0.495065	0.589927	0.688399	0.822872	0.408597	0.453996	0.492358	0.530951	0.578732	0.62322	0.664261	0.648892
80	Model3	1	2_4	0.877147	0.798177	0.393202	0.512392	0.605428	0.653402	0.703954	0.75089	0.795235	0.811594	0.768059	0.986141	0.958877	0.938348	0.904607	0.834921	0.741639	0.598702	0.349612	0.0470119	0.203632	0.369644	0.49899	0.573088	0.662082	0.753847	0.85807	0.959295	0.998587	0.283616	0.327205	0.374529	0.40386	0.441322	0.490646	0.574222	0.733049	0.914085	0.440534	0.487915	0.535371	0.558416	0.577428	0.590581	0.586206	0.473431
80	Model3	2	2	0.512217	0.369226	0.228795	0.228795	0.228795	0.228795	0.505674	0.771205	0.771205	0.771205	0.771205	1	1	1	1	0.505087	0	0	0	0	0	0	0	0	0.505848	1	1	1	1	0.228795	0.228795	0.228795	0.228795	0.232679	0	0	0	0	0.372389	0.372389	0.372389	0.372389	0.318592	0	0	0
80	Model3	3	3	0.857126	0.693653	0.191453	0.382858	0.494968	0.568824	0.686571	0.768878	0.827332	0.831963	0.808547	1	0.982472	0.947338	0.901682	0.815355	0.67978	0.473199	0.193856	0	0	0.240877	0.387853	0.490008	0.656076	0.789976	0.911186	0.983059	1	0.191453	0.234569	0.268173	0.295103	0.359533	0.433877	0.557836	0.730425	0	0.321378	0.378718	0.418015	0.444673	0.499021	0.52968	0.512044	0.306394
[truncated: 12 more columns]

## Sheet: SUMMARY
					VALIDATION			TEST			VALIDATION TRIAL 1			TEST TRIAL 1			VALIDATION TRIAL 2			TEST TRIAL 2			VALIDATION TRIAL 3			TEST TRIAL 3
WS	Name		Channel	Channels	AUROC_SLEEP	AUPR_SLEEP	BEST AHI ONLY SLEEP F1	AUROC_SLEEP	AUPR_SLEEP	AHI SLEEP F1 - THR	AUROC_SLEEP	AUPR_SLEEP	BEST AHI ONLY SLEEP F1	AUROC_SLEEP	AUPR_SLEEP	AHI SLEEP F1 - THR	AUROC_SLEEP	AUPR_SLEEP	BEST AHI ONLY SLEEP F1	AUROC_SLEEP	AUPR_SLEEP	AHI SLEEP F1 - THR	AUROC_SLEEP	AUPR_SLEEP	BEST AHI ONLY SLEEP F1	AUROC_SLEEP	AUPR_SLEEP	AHI SLEEP F1 - THR
80	Model2	NN1D-L3	2_3_5	ABDO_THOR_SPO2	0.915042	0.78961	0.70251	0.927513	0.866481	0.672415	0.922757	0.819673	0.704715	0.934443	0.893269	0.602862	0.896481	0.70671	0.677165	0.925661	0.87497	0.716108	0.92589	0.842446	0.72565	0.922436	0.831203	0.72565
80	Model2	NN1D-L3	2_3_4_5	ABDO_THOR_FLOW_SPO2	0.914668	0.787957	0.701945	0.927119	0.865806	0.640706	0.921467	0.815413	0.708414	0.933678	0.891193	0.597186	0.895615	0.703759	0.676081	0.924234	0.872849	0.625345	0.926921	0.8447	0.721341	0.923445	0.833377	0.721341
80	Model3	NN1D-L1	3_5	THOR_SPO2	0.906931	0.772417	0.701553	0.922417	0.857451	0.667696	0.911833	0.797478	0.689671	0.927556	0.883527	0.62511	0.889347	0.687485	0.699836	0.92391	0.869208	0.68734	0.919613	0.832289	0.715153	0.915786	0.819618	0.715153
80	Model2	NN1D-L3	3_5	THOR_SPO2	0.91202	0.784847	0.697957	0.925356	0.863214	0.674697	0.91655	0.808204	0.702798	0.930506	0.886842	0.62433	0.897102	0.708415	0.68257	0.926739	0.87697	0.715832	0.922407	0.837922	0.708503	0.918824	0.82583	0.708503
80	Model3	NN1D-L1	2_4_5	ABDO_FLOW_SPO2	0.905224	0.770845	0.697701	0.921742	0.856281	0.693056	0.910391	0.790906	0.698273	0.926513	0.877216	0.689045	0.881235	0.680717	0.66421	0.918656	0.863247	0.682404	0.924048	0.84091	0.730621	0.920057	0.828381	0.730621
80	Model3	NN1D-L1	3_4_5	THOR_FLOW_SPO2	0.910718	0.77993	0.697143	0.925282	0.861506	0.692199	0.913526	0.799111	0.698285	0.929381	0.885048	0.655781	0.894734	0.701533	0.66506	0.926464	0.872947	0.713472	0.923895	0.839146	0.728084	0.920001	0.826523	0.728084
80	Model3	NN1D-L1	2_3_4_5	ABDO_THOR_FLOW_SPO2	0.91194	0.781079	0.695257	0.925841	0.862094	0.686204	0.915854	0.802133	0.698164	0.930095	0.885956	0.634488	0.893987	0.698976	0.653475	0.925278	0.87029	0.713685	0.925979	0.842128	0.734131	0.92215	0.830037	0.734131
80	Model2	NN1D-L3	2_4_5	ABDO_FLOW_SPO2	0.909054	0.776431	0.694172	0.923934	0.859165	0.682329	0.916411	0.80293	0.702866	0.931528	0.887408	0.622635	0.886544	0.687401	0.655133	0.919355	0.862063	0.722465	0.924205	0.838961	0.724517	0.92092	0.828023	0.724517
80	Model2	NN1D-L3	3_4_5	THOR_FLOW_SPO2	0.914532	0.790057	0.693881	0.927088	0.865016	0.676602	0.917596	0.809728	0.702798	0.932113	0.888617	0.610157	0.901825	0.720017	0.666485	0.928648	0.878311	0.726245	0.924176	0.840427	0.71236	0.920502	0.828119	0.71236
80	Model3	NN1D-L1	2_3_5	ABDO_THOR_SPO2	0.909599	0.776564	0.690635	0.924344	0.860037	0.635625	0.916136	0.802785	0.696256	0.930119	0.886298	0.651883	0.889273	0.690399	0.646768	0.923261	0.869337	0.555889	0.923388	0.836508	0.728881	0.919651	0.824476	0.728881
80	Model2	NN1D-L3	2_5	ABDO_SPO2	0.903494	0.769052	0.687618	0.920732	0.856272	0.682133	0.91636	0.805695	0.712354	0.930144	0.886372	0.635174	0.873212	0.668115	0.636734	0.91447	0.859966	0.713917	0.920911	0.833348	0.713767	0.917584	0.822477	0.713767
80	Model2	NN1D-L3	4_5	FLOW_SPO2	0.903085	0.76808	0.687296	0.920527	0.853588	0.668896	0.907275	0.790926	0.687169	0.928348	0.88025	0.662978	0.884082	0.683017	0.672447	0.918946	0.862731	0.647986	0.917896	0.830298	0.702271	0.914286	0.817784	0.702271
80	Model3	NN1D-L1	4_5	FLOW_SPO2	0.900312	0.764735	0.683802	0.91866	0.851856	0.699203	0.900362	0.77743	0.692322	0.923241	0.871345	0.685006	0.882334	0.682971	0.646193	0.918662	0.863636	0.712505	0.91824	0.833803	0.71289	0.914076	0.820588	0.71289
80	Model2	NN1D-L3	5	SPO2	0.892873	0.753975	0.666664	0.911223	0.842561	0.681142	0.899401	0.780485	0.68155	0.916768	0.866851	0.663833	0.873406	0.66829	0.638337	0.914587	0.860049	0.71573	0.905811	0.81315	0.680104	0.902316	0.800784	0.680104
80	Model3	NN1D-L1	2_5	ABDO_SPO2	0.898347	0.758057	0.664524	0.918268	0.850801	0.463754	0.908936	0.787869	0.696301	0.924846	0.875232	0.672025	0.866732	0.653838	0.579933	0.914235	0.857035	0.0244706	0.919372	0.832463	0.71734	0.915724	0.820136	0.71734
80	Model3	NN1D-L1	5	SPO2	0.888306	0.744363	0.658595	0.909717	0.839804	0.452687	0.894064	0.768836	0.674746	0.914371	0.863611	0.667491	0.866347	0.651808	0.625664	0.913877	0.855794	0.0244706	0.904507	0.812445	0.675375	0.900902	0.800008	0.675375
80	Model1	NN1D-1ch	10	SPO2+25	0.866983	0.686918	0.652916	0.894146	0.810637	0.121065	0.871834	0.710448	0.6479	0.901923	0.851741	0.0558181	0.838474	0.54367	0.615697	0.891809	0.784372	0.0363848	0.890642	0.806635	0.69515	0.888707	0.7958	0.69515
80	Model2	NN1D-L3	2_3_4	ABDO_THOR_FLOW	0.889417	0.735374	0.634175	0.889092	0.800065	0.530228	0.896929	0.763712	0.634535	0.893214	0.823117	0.426685	0.869	0.646437	0.620923	0.877222	0.797579	0.535808	0.902323	0.795972	0.647067	0.89684	0.779499	0.647067
80	Model1	NN1D-1ch	8	SPO2+15	0.857862	0.658633	0.633885	0.882962	0.781145	0.443714	0.867227	0.705143	0.652782	0.887082	0.839266	0.031977	0.832437	0.557462	0.599393	0.889961	0.804726	0.648374	0.873922	0.713293	0.649481	0.871845	0.699442	0.649481
80	Model3	NN1D-L1	2_3_4	ABDO_THOR_FLOW	0.884216	0.719579	0.627273	0.884066	0.792181	0.511114	0.888949	0.743355	0.615134	0.887824	0.814852	0.466198	0.863086	0.623602	0.614025	0.869815	0.787659	0.432184	0.900614	0.791781	0.652658	0.894559	0.774032	0.652658
80	Model2	NN1D-L3	2_4	ABDO_THOR	0.869785	0.706031	0.624571	0.863079	0.767524	0.475838	0.886489	0.74926	0.636103	0.890045	0.820883	0.400941	0.830709	0.589154	0.600614	0.811921	0.71822	0.418332	0.892158	0.779679	0.636996	0.887272	0.763469	0.636996
80	Model3	NN1D-L1	3_4	THOR_FLOW	0.877769	0.710001	0.609295	0.877812	0.78249	0.506005	0.875341	0.72208	0.578937	0.875366	0.795919	0.429956	0.863433	0.623731	0.605272	0.870357	0.787377	0.46543	0.894535	0.784191	0.643676	0.887714	0.764173	0.643676
80	Model1	NN1D-1ch	7	SPO2+10	0.849593	0.677884	0.608698	0.874248	0.778817	0.0849529	0.85224	0.724163	0.631477	0.880068	0.824995	0.0306731	0.854237	0.604395	0.615136	0.904115	0.820629	0.133002	0.842303	0.705095	0.579482	0.83856	0.690825	0.579482
80	Model3	NN1D-L1	2_4	ABDO_THOR	0.855457	0.674152	0.605825	0.847022	0.744071	0.468599	0.868899	0.707796	0.624391	0.877147	0.798177	0.50735	0.808007	0.53761	0.550547	0.780704	0.675372	0.290432	0.889465	0.777051	0.642538	0.883215	0.758666	0.642538
80	Model2	NN1D-L3	3_4	THOR_FLOW	0.88182	0.722601	0.602103	0.882175	0.788475	0.534149	0.881757	0.737262	0.595652	0.882008	0.805339	0.443024	0.868316	0.643594	0.589274	0.875691	0.792246	0.54371	0.895387	0.786947	0.621383	0.888827	0.767839	0.621383
80	Model2	NN1D-L3	2_3	ABDO_THOR	0.878198	0.707724	0.600187	0.87939	0.784627	0.503963	0.8927	0.753095	0.622012	0.886836	0.813472	0.393804	0.849634	0.595169	0.562885	0.863703	0.781453	0.516939	0.892261	0.774908	0.615663	0.887631	0.758955	0.615663
80	Model3	NN1D-L1	2_3	ABDO_THOR	0.870509	0.684231	0.58168	0.871585	0.770197	0.500801	0.8826	0.729275	0.573145	0.879585	0.804501	0.420646	0.842807	0.562669	0.564325	0.854499	0.764097	0.501626	0.886118	0.760747	0.607571	0.880671	0.741992	0.607571
80	Model1	NN1D-1ch	9	SPO2+20	0.827408	0.61403	0.571045	0.848576	0.715964	0.394491	0.864766	0.670402	0.636729	0.889709	0.825181	0.580729	0.822766	0.599577	0.61591	0.864328	0.764709	0.156553	0.794693	0.572112	0.460495	0.791691	0.558	0.460495
80	Model2	NN1D-L3	4	FLOW	0.834182	0.656435	0.5672	0.842522	0.739233	0.168402	0.818611	0.648608	0.530437	0.868096	0.789049	0.0247207	0.828007	0.587553	0.592015	0.812415	0.719155	0.386268	0.855929	0.733144	0.579149	0.847054	0.709495	0.579149
80	Model2	NN1D-L3	3	THOR	0.861848	0.678714	0.563531	0.862233	0.757535	0.477582	0.865858	0.702395	0.556078	0.859655	0.773479	0.367384	0.849472	0.594735	0.560422	0.8634	0.781559	0.524775	0.870213	0.739011	0.574092	0.863645	0.717568	0.574092
80	Model3	NN1D-L1	4	FLOW	0.819221	0.625295	0.557618	0.821847	0.710152	0.131522	0.796723	0.609229	0.52942	0.839554	0.747405	0.0247207	0.80801	0.536925	0.551764	0.780909	0.67488	0.284189	0.852929	0.729732	0.591669	0.845078	0.70817	0.591669
80	Model1	NN1D-1ch	3	THOR	0.853395	0.659213	0.550429	0.850902	0.743262	0.361179	0.854988	0.68774	0.535485	0.843172	0.765684	0.0379817	0.84152	0.567832	0.560399	0.852812	0.766668	0.516179	0.863678	0.722069	0.555402	0.856721	0.697435	0.555402
80	Model1	NN1D-1ch	4	FLOW	0.815518	0.625328	0.549123	0.801187	0.70313	0.228843	0.792218	0.613382	0.522862	0.831348	0.750509	0.0858456	0.806036	0.532022	0.532204	0.73293	0.650391	0.0360498	0.848301	0.730579	0.592304	0.839284	0.708491	0.592304
80	Model3	NN1D-L1	3	THOR	0.854937	0.653988	0.538598	0.854459	0.741171	0.202205	0.858013	0.681188	0.515087	0.851654	0.765331	0.0247207	0.842769	0.562992	0.564872	0.854598	0.764529	0.496236	0.864027	0.717783	0.535835	0.857126	0.693653	0.535835
80	Model1	NN1D-1ch	5	SPO2	0.756574	0.537216	0.494169	0.780032	0.634521	0.0606769	0.841149	0.647336	0.579159	0.877525	0.795474	0.0395013	0.843454	0.622478	0.653194	0.882748	0.780419	0.0549013	0.585118	0.341834	0.250153	0.579825	0.327668	0.250153
80	Model2	NN1D-L3	2	ABDO	0.76265	0.560985	0.458191	0.768285	0.650718	0.317644	0.875742	0.729092	0.618944	0.873354	0.797552	0.352704	0.543345	0.218124	0.177429	0.565402	0.433967	0.0244706	0.868862	0.73574	0.5782	0.866099	0.720633	0.5782
80	Model1	NN1D-1ch	2	ABDO	0.733849	0.528478	0.447916	0.736193	0.610066	0.0594693	0.848099	0.675094	0.572534	0.84964	0.764262	0.0536848	0.50285	0.194462	0.177182	0.513008	0.371399	0.0244706	0.850599	0.715879	0.594032	0.845931	0.694537	0.594032
80	Model3	NN1D-L1	2	ABDO	0.735132	0.52615	0.433314	0.737602	0.608386	0.152531	0.848319	0.672039	0.558915	0.849659	0.762216	0.347464	0.501765	0.194317	0.177182	0.512217	0.369226	0.0244706	0.855313	0.712094	0.563847	0.850929	0.693716	0.563847
30	Model2	NN1D-L3	2_3_4_5	ABDO_THOR_FLOW_SPO2	0.910013	0.704599	0.713549	0.915848	0.783998	0.708941	0.912795	0.730803	0.72124	0.917287	0.807466	0.740696	0.899707	0.622005	0.692373	0.915354	0.797517	0.670446	0.917536	0.760988	0.727034	0.914904	0.74701	0.727034
30	Model2	NN1D-L3	2_3_5	ABDO_THOR_SPO2	0.910278	0.706427	0.708555	0.915908	0.784133	0.716457	0.914972	0.733345	0.698912	0.919068	0.807017	0.741583	0.898433	0.623188	0.692517	0.914409	0.798408	0.682536	0.91743	0.762748	0.734236	0.914248	0.746975	0.734236
30	Model2	NN1D-L3	2_4_5	ABDO_FLOW_SPO2	0.90382	0.695363	0.706006	0.912414	0.778209	0.729265	0.910053	0.725993	0.708668	0.916498	0.804774	0.750844	0.888018	0.604138	0.680965	0.910932	0.791226	0.71262	0.913389	0.755958	0.728386	0.909811	0.738627	0.728386
30	Model2	NN1D-L3	2_5	ABDO_SPO2	0.904547	0.69705	0.705089	0.913216	0.77977	0.729725	0.910271	0.725638	0.706495	0.916527	0.803634	0.748658	0.888909	0.607309	0.680204	0.91218	0.7944	0.7108	0.91446	0.758204	0.728567	0.91094	0.741276	0.728567
30	Model2	NN1D-L3	3_5	THOR_SPO2	0.905429	0.69846	0.701384	0.912225	0.778944	0.70471	0.909	0.72465	0.70403	0.914904	0.80265	0.74352	0.89451	0.616823	0.68238	0.912152	0.796428	0.661021	0.912778	0.753906	0.717743	0.909618	0.737753	0.717743
30	Model2	NN1D-L3	3_4_5	THOR_FLOW_SPO2	0.904942	0.696558	0.69398	0.911506	0.777085	0.702426	0.908497	0.722523	0.692704	0.913898	0.799168	0.74513	0.893157	0.611844	0.674668	0.910669	0.79276	0.654937	0.913174	0.755306	0.714567	0.909952	0.739326	0.714567
30	Model3	NN1D-L1	2_3_4_5	ABDO_THOR_FLOW_SPO2	0.901859	0.685667	0.683837	0.908199	0.771573	0.723583	0.907097	0.718809	0.676436	0.912057	0.801029	0.755871	0.88612	0.585569	0.645675	0.903126	0.775362	0.687593	0.91236	0.752623	0.729399	0.909413	0.738329	0.729399
30	Model2	NN1D-L3	5	SPO2	0.888628	0.672537	0.68169	0.900717	0.762064	0.702591	0.894342	0.701562	0.693773	0.90439	0.78695	0.737464	0.871877	0.58077	0.635937	0.902041	0.782212	0.663453	0.899666	0.73528	0.71536	0.895721	0.71703	0.71536
30	Model3	NN1D-L1	2_5	ABDO_SPO2	0.895695	0.678579	0.680613	0.905196	0.768836	0.719698	0.902567	0.71511	0.699267	0.910092	0.799123	0.751206	0.875757	0.571812	0.608114	0.900204	0.773621	0.679553	0.908761	0.748815	0.734457	0.905293	0.733765	0.734457
30	Model2	NN1D-L3	4_5	FLOW_SPO2	0.888921	0.673377	0.679115	0.900963	0.762788	0.694246	0.894734	0.703225	0.695955	0.904638	0.78838	0.734029	0.871287	0.579865	0.630766	0.901435	0.781001	0.638159	0.900741	0.737041	0.710623	0.896817	0.718983	0.710623
30	Model3	NN1D-L1	2_3_5	ABDO_THOR_SPO2	0.901692	0.685245	0.678405	0.907704	0.770603	0.712522	0.906921	0.717996	0.68376	0.911774	0.800432	0.757053	0.885821	0.586449	0.623547	0.902134	0.774197	0.657163	0.912334	0.751289	0.727907	0.909203	0.737182	0.727907
30	Model3	NN1D-L1	3_5	THOR_SPO2	0.896576	0.67691	0.678205	0.904307	0.765723	0.708208	0.900962	0.705366	0.674113	0.908052	0.793676	0.737567	0.882177	0.582461	0.639681	0.901394	0.774602	0.667073	0.906587	0.742903	0.720822	0.903476	0.728892	0.720822
30	Model3	NN1D-L1	2_4_5	ABDO_FLOW_SPO2	0.894922	0.677259	0.678049	0.904044	0.766871	0.723697	0.90194	0.713945	0.68995	0.909312	0.797885	0.751331	0.874107	0.568773	0.6103	0.897621	0.768719	0.693884	0.908719	0.749059	0.733895	0.9052	0.73401	0.733895
30	Model3	NN1D-L1	3_4_5	THOR_FLOW_SPO2	0.896709	0.67706	0.672809	0.904451	0.766025	0.706508	0.901324	0.705857	0.671311	0.908384	0.793805	0.73874	0.881895	0.581788	0.62977	0.901172	0.774851	0.659637	0.906907	0.743536	0.717347	0.903797	0.729419	0.717347
30	Model3	NN1D-L1	5	SPO2	0.877942	0.653557	0.654376	0.891303	0.75089	0.6731	0.884075	0.684627	0.662147	0.896332	0.780216	0.7111	0.857724	0.551062	0.605645	0.889071	0.762278	0.636355	0.892027	0.724981	0.695336	0.888507	0.710175	0.695336
30	Model3	NN1D-L1	4_5	FLOW_SPO2	0.877663	0.652775	0.652191	0.89096	0.749915	0.669374	0.884332	0.685196	0.661422	0.89656	0.780345	0.710453	0.856536	0.54922	0.600013	0.887727	0.760458	0.626161	0.892122	0.723908	0.695137	0.888592	0.708942	0.695137
30	Model1	NN1D-1ch	7	SPO2+10	0.8158	0.534695	0.646111	0.830526	0.661448	0.494061	0.837163	0.557639	0.680226	0.862092	0.719572	0.725701	0.782504	0.426255	0.591963	0.804779	0.65971	0.630457	0.827735	0.62019	0.666142	0.824707	0.605061	0.666142
30	Model1	NN1D-1ch	8	SPO2+15	0.829418	0.570367	0.622993	0.85137	0.672441	0.42362	0.835836	0.631474	0.662713	0.862445	0.744532	0.0775018	0.804861	0.436048	0.595127	0.845636	0.637944	0.593125	0.847557	0.64358	0.611138	0.846028	0.634848	0.611138
30	Model1	NN1D-1ch	5	SPO2	0.79772	0.498144	0.620749	0.813246	0.597185	0.636069	0.798718	0.507663	0.630696	0.81696	0.654523	0.66908	0.804401	0.467911	0.646385	0.834449	0.640451	0.654763	0.790043	0.518858	0.585165	0.788329	0.496581	0.585165
30	Model2	NN1D-L3	2	ABDO	0.831983	0.540436	0.619367	0.831806	0.623211	0.523487	0.843551	0.579626	0.65294	0.834468	0.646448	0.393925	0.812214	0.437676	0.604131	0.823251	0.63662	0.585811	0.840184	0.604005	0.601031	0.837699	0.586565	0.601031
30	Model2	NN1D-L3	2_4	ABDO_THOR	0.832176	0.54138	0.616895	0.830898	0.619856	0.526533	0.845024	0.584516	0.655519	0.835415	0.647983	0.408519	0.810547	0.433222	0.58985	0.81901	0.623148	0.577303	0.840957	0.606401	0.605317	0.83827	0.588438	0.605317
30	Model1	NN1D-1ch	2	ABDO	0.811608	0.507941	0.600232	0.809095	0.59708	0.162192	0.824983	0.557033	0.635166	0.806869	0.621252	0.373264	0.785105	0.382159	0.568817	0.79897	0.604514	0.0265047	0.824736	0.584629	0.596713	0.821445	0.565473	0.596713
30	Model2	NN1D-L3	2_3	ABDO_THOR	0.856586	0.57746	0.598098	0.849792	0.649899	0.546383	0.8615	0.608986	0.635902	0.846406	0.66557	0.432072	0.847052	0.488716	0.541262	0.84414	0.665434	0.600599	0.861205	0.63468	0.617129	0.85883	0.618694	0.617129
30	Model3	NN1D-L1	2	ABDO	0.813456	0.505865	0.595619	0.811484	0.595488	0.525364	0.826697	0.554768	0.636285	0.8105	0.620102	0.426854	0.786234	0.37971	0.546941	0.799754	0.600073	0.562724	0.827436	0.583115	0.603631	0.824197	0.566288	0.603631
30	Model3	NN1D-L1	2_3	ABDO_THOR	0.844891	0.552879	0.59155	0.836975	0.633527	0.556655	0.848799	0.585058	0.640902	0.829034	0.646591	0.464401	0.835407	0.45585	0.521453	0.83398	0.651337	0.609093	0.850468	0.617728	0.612296	0.84791	0.602653	0.612296
30	Model2	NN1D-L3	2_3_4	ABDO_THOR_FLOW	0.856077	0.576958	0.59076	0.84911	0.648732	0.542982	0.861488	0.60971	0.631249	0.846086	0.665621	0.441994	0.848547	0.492628	0.540789	0.84548	0.668076	0.602079	0.858197	0.628536	0.600241	0.855764	0.6125	0.600241
30	Model3	NN1D-L1	2_3_4	ABDO_THOR_FLOW	0.844993	0.55361	0.590132	0.837268	0.634066	0.557576	0.848897	0.586345	0.630294	0.829296	0.647725	0.468648	0.835421	0.456344	0.530964	0.83446	0.651686	0.610342	0.850661	0.618139	0.609138	0.848047	0.602788	0.609138
30	Model1	NN1D-1ch	9	SPO2+20	0.807447	0.506049	0.585736	0.808407	0.599906	0.455112	0.854884	0.625094	0.656692	0.87006	0.742408	0.703702	0.71425	0.292577	0.456162	0.706088	0.477198	0.037468	0.853207	0.600476	0.644353	0.849073	0.580113	0.644353
30	Model2	NN1D-L3	3	THOR	0.827419	0.523092	0.554437	0.818802	0.600317	0.482657	0.824594	0.535707	0.56206	0.804589	0.599088	0.365777	0.82733	0.454681	0.533783	0.825029	0.64464	0.555631	0.830333	0.57889	0.567469	0.826788	0.557222	0.567469
30	Model1	NN1D-1ch	10	SPO2+25	0.800408	0.491284	0.550511	0.817999	0.617769	0.380642	0.788536	0.461927	0.504107	0.824432	0.652699	0.0363324	0.759013	0.344076	0.488736	0.7785	0.547387	0.470116	0.853675	0.667847	0.658689	0.851066	0.653221	0.658689
30	Model3	NN1D-L1	3_4	THOR_FLOW	0.812357	0.484955	0.546612	0.801915	0.571222	0.416068	0.805862	0.487545	0.515599	0.782487	0.567423	0.267761	0.813975	0.416105	0.571223	0.808265	0.613218	0.45837	0.817236	0.551216	0.553014	0.814993	0.533025	0.553014
30	Model3	NN1D-L1	3	THOR	0.812435	0.48607	0.54162	0.801907	0.571277	0.468826	0.806024	0.49085	0.517044	0.782501	0.569031	0.363739	0.814064	0.415213	0.552733	0.808228	0.610828	0.520361	0.817218	0.552148	0.555082	0.814992	0.533971	0.555082
30	Model2	NN1D-L3	3_4	THOR_FLOW	0.827396	0.523668	0.541287	0.818409	0.599537	0.4862	0.827723	0.54456	0.568866	0.80731	0.604709	0.366512	0.825124	0.450434	0.489651	0.822225	0.639755	0.571422	0.82934	0.57601	0.565343	0.825693	0.554147	0.565343
30	Model1	NN1D-1ch	3	THOR	0.810282	0.485193	0.53214	0.798077	0.568834	0.325593	0.803544	0.493384	0.515307	0.776109	0.56891	0.0247541	0.812429	0.416761	0.576992	0.805631	0.611415	0.470646	0.814874	0.545435	0.504121	0.812492	0.526178	0.504121
30	Model3	NN1D-L1	2_4	ABDO_THOR	0.813165	0.504577	0.46822	0.811391	0.595209	0.393943	0.825957	0.552104	0.405139	0.81008	0.620118	0.570844	0.786162	0.378693	0.395887	0.799948	0.59943	0.0244706	0.827375	0.582934	0.603635	0.824147	0.566079	0.603635
30	Model2	NN1D-L3	4	FLOW	0.617832	0.258869	0.234152	0.61898	0.352723	0.0449863	0.707911	0.342605	0.278794	0.739234	0.501594	0.0247207	0.645514	0.22394	0.337841	0.617345	0.356718	0.0244706	0.500072	0.210061	0.0858209	0.500362	0.199858	0.0858209
30	Model3	NN1D-L1	4	FLOW	0.509136	0.186125	0.164309	0.522572	0.270274	0.147963	0.524568	0.211801	0.225181	0.557485	0.323542	0.324858	0.502927	0.136506	0.177182	0.51025	0.286115	0.0244706	0.499914	0.210069	0.090566	0.499982	0.201163	0.090566
30	Model1	NN1D-1ch	4	FLOW	0.497067	0.179984	0.123475	0.499385	0.257162	0.045076	0.493768	0.195504	0.107528	0.496092	0.29026	0.0247207	0.497571	0.134719	0.177182	0.502161	0.28114	0.0244706	0.499862	0.209728	0.0857171	0.499902	0.200085	0.0857171
